# Supplementary material for: Quantification of drainable water storage volumes on landmasses and in river networks based on GRACE and river runoff using a cascaded storage approach – first application on the Amazon
Source: Copernicus journal article supplement (doi:10.5194/hess-24-1447-2020), 2020-03-30
Supplement: Supplementary file 2 [file hess-24-1447-2020-supplement.zip]

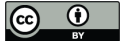

## *Supplement of*

# **Quantification of drainable water storage volumes on landmasses and in river networks based on GRACE and river runoff using a cascaded storage approach – first application on the Amazon**

**Johannes Riegger**

*Correspondence to:* Johannes Riegger ([johannes.riegger@iws.uni-stuttgart.de](mailto:johannes.riegger@iws.uni-stuttgart.de))

- [hess-24-1447-2020-supplement-title-page.pdf](#)
- [Riegger\\_Cascade\\_approach\\_4.xlsx](#)
- [Riegger\\_Readme\\_7.pdf](#)

The copyright of individual parts of the supplement might differ from the CC BY 4.0 License.
