# Supplementary material for: Quantification of drainable water storage volumes on landmasses and in river networks based on GRACE and river runoff using a cascaded storage approach – first application on the Amazon
Source: Copernicus journal article supplement (doi:10.5194/hess-24-1447-2020), 2020-03-30
Supplement: Supplementary file 3 [file hess-24-1447-2020-supplement.zip]

Archive with 3 entries (3 files):
- Riegger_Readme_7.pdf
- Riegger_Cascade_approach_4.xlsx
- hess-24-1447-2020-supplement-title-page.pdf
