# Supplementary material for: Quantification of drainable water storage volumes on landmasses and in river networks based on GRACE and river runoff using a cascaded storage approach – first application on the Amazon
Source: Copernicus journal article supplement (doi:10.5194/hess-24-1447-2020), 2020-03-30
Supplement: Supplementary file 3 [file hess-24-1447-2020-supplement.zip › Riegger_Cascade_approach_4.xlsx]

## Sheet: Synthetic Eval
N Ampl.	N Offset	tau C	tau R	AvgMCm	AvgMRm	AvgMTm	StdMCm/N	StdMRm/N	StdMTm/N	StdRCm/N	StdRRm/N	StdRR / Std RC	StdMR / StdRC						Offset	RMSE MCm		N Ampl.	N Offset	tau C	tau R	RMSE RRm	RMSE dMTm	rel.Error tC	rel.Error tR						AvgMTm Fit
1	1	3	2.5	3	2.5	5.5	1.61836	0.824227	2.23137	0.539452	0.329691	0.611158	1.5279						5.50001	2.53524		1	1	3.00001	2.49999	4.30616e-08	8.44184e-08	1.99712e-06	-2.27561e-06						5.5
																			Ampl	RMSE MRm
																			2.15275	3.153
																Balance-	Check		Phasing	RMSE MTm
time [mo]	sin	N	MC	RC	MR	RR	MT	Mean time [mo]	MCm	RCm	MRm	RRm	MTm	dMTm		dMT/dt	dMT/dt+RRm-N		2.48696	2.3322e-05		time [mo]	sin	N	MC Fit	RC Fit	MR Fit	RR Fit	MT Fit	Mean time [mo]	MCm Fit	RCm Fit	MRm Fit	RRm Fit	MTm Fit	dMTm Fit
		1	Eq.10	Eq.5	Eq.12	Eq.18	Eq.13		Eq.16	Eq.17	Eq.18	Eq.19	Eq.20				Eq.21		sinPhase-	Test				1	Eq.10	Eq.5	Eq.12	Eq.18	Eq.13		Eq.16	Eq.17	Eq.18	Eq.19	Eq.20
0	0	1	3	1	2.5	1	5.5												3.42446			0	0	1	3.00001	1	2.49999	1	5.5				0
1	0.5	1.5	3.4252	1.14173	2.56552	1.02621	5.99072	0.5	3.22439	1.0748	2.5232	1.00928	5.74759	0.247595		0.490718	0		3.98821			1	0.5	1.5	3.42521	1.14173	2.56551	1.02621	5.99072	0.5	3.2244	1.0748	2.5232	1.00928	5.74759	0.247595
2	0.866025	1.86603	4.04114	1.34705	2.75564	1.10226	6.79678	1.5	3.75025	1.25008	2.6499	1.05996	6.40015	0.900154		0.806064	0		4.95705			2	0.866025	1.86603	4.04115	1.34705	2.75563	1.10226	6.79678	1.5	3.75026	1.25008	2.6499	1.05996	6.40015	0.900154
3	1	2	4.59642	1.53214	3.04295	1.21718	7.63937	2.5	4.33418	1.44473	2.89353	1.15741	7.2277	1.7277		0.842589	0		6.07137			3	1	2	4.59643	1.53214	3.04295	1.21718	7.63937	2.5	4.33418	1.44473	2.89352	1.15741	7.2277	1.7277
4	0.866025	1.86603	4.88036	1.62679	3.34629	1.33852	8.22665	3.5	4.74626	1.58209	3.19687	1.27875	7.94313	2.44313		0.587276	0		7.0326			4	0.866025	1.86603	4.88037	1.62679	3.34628	1.33852	8.22665	3.5	4.74627	1.58209	3.19687	1.27875	7.94313	2.44313
5	0.5	1.5	4.77254	1.59085	3.56727	1.42691	8.33981	4.5	4.82346	1.60782	3.4671	1.38684	8.29056	2.79056		0.113159	0		7.58317			5	0.5	1.5	4.77255	1.59085	3.56726	1.42691	8.33981	4.5	4.82347	1.60782	3.46709	1.38684	8.29056	2.79056
6	1.22515e-16	1	4.27008	1.42336	3.62497	1.44999	7.89505	5.5	4.50738	1.50246	3.6119	1.44476	8.11928	2.61928		-0.44476	0		7.57556			6	1.22515e-16	1	4.27009	1.42336	3.62496	1.44999	7.89505	5.5	4.50739	1.50246	3.61189	1.44476	8.11928	2.61928
7	-0.5	0.5	3.48485	1.16162	3.48203	1.39281	6.96688	6.5	3.85569	1.28523	3.57041	1.42817	7.42611	1.92611		-0.928166	-8.88178e-16		7.01181			7	-0.5	0.5	3.48486	1.16162	3.48203	1.39281	6.96688	6.5	3.8557	1.28523	3.57041	1.42817	7.42611	1.92611
8	-0.866025	0.133975	2.61094	0.870312	3.15683	1.26273	5.76776	7.5	3.02366	1.00789	3.33273	1.33309	6.35639	0.856393		-1.19912	8.88178e-16		6.04297			8	-0.866025	0.133975	2.61094	0.870313	3.15682	1.26273	5.76776	7.5	3.02367	1.00789	3.33272	1.33309	6.35639	0.856393
9	-1	0	1.87082	0.623606	2.71936	1.08774	4.59018	8.5	2.22036	0.740119	2.94397	1.17759	5.16433	-0.335674		-1.17759	-6.66134e-16		4.92865			9	-1	0	1.87082	0.623607	2.71935	1.08774	4.59018	8.5	2.22036	0.740119	2.94396	1.17759	5.16433	-0.335674
10	-0.866025	0.133975	1.45443	0.484811	2.27266	0.909064	3.72709	9.5	1.65108	0.55036	2.49265	0.997059	4.14373	-1.35627		-0.863084	4.44089e-16		3.96743			10	-0.866025	0.133975	1.45444	0.484812	2.27265	0.909064	3.72709	9.5	1.65109	0.550361	2.49264	0.997059	4.14373	-1.35627
11	-0.5	0.5	1.46735	0.489116	1.92498	0.769992	3.39233	10.5	1.46125	0.487083	2.0869	0.834762	3.54815	-1.95185		-0.334762	0		3.41686			11	-0.5	0.5	1.46735	0.489117	1.92498	0.769992	3.39233	10.5	1.46125	0.487084	2.0869	0.834762	3.54815	-1.95185
12	-2.4503e-16	1	1.90181	0.633936	1.76042	0.70417	3.66223	11.5	1.69662	0.565541	1.82524	0.730098	3.52187	-1.97813		0.269902	0		3.42446			12	-2.4503e-16	1	1.90181	0.633936	1.76042	0.70417	3.66223	11.5	1.69663	0.565542	1.82524	0.730098	3.52187	-1.97813
13	0.5	1.5	2.63831	0.879438	1.81602	0.726407	4.45433	12.5	2.29048	0.763494	1.76975	0.707899	4.06023	-1.43977		0.792101	0		3.98821			13	0.5	1.5	2.63832	0.879438	1.81601	0.726407	4.45433	12.5	2.29049	0.763494	1.76974	0.707899	4.06023	-1.43977
14	0.866025	1.86603	3.47731	1.1591	2.07142	0.828568	5.54873	13.5	3.08108	1.02703	1.92906	0.771624	5.01014	-0.489863		1.0944	0		4.95705			14	0.866025	1.86603	3.47732	1.1591	2.07142	0.828568	5.54873	13.5	3.08108	1.02702	1.92906	0.771624	5.01014	-0.489863
15	1	2	4.19242	1.39747	2.45403	0.981613	6.64645	14.5	3.85469	1.2849	2.25571	0.902286	6.11041	0.610407		1.09771	0		6.07137			15	1	2	4.19242	1.39747	2.45403	0.981613	6.64645	14.5	3.8547	1.2849	2.25571	0.902286	6.11041	0.610407
16	0.866025	1.86603	4.59088	1.53029	2.85818	1.14327	7.44905	15.5	4.40269	1.46756	2.65855	1.06342	7.06124	1.56124		0.802607	0		7.0326			16	0.866025	1.86603	4.59088	1.53029	2.85817	1.14327	7.44905	15.5	4.4027	1.46756	2.65854	1.06342	7.06124	1.56124
17	0.5	1.5	4.56512	1.52171	3.17319	1.26928	7.73831	16.5	4.57728	1.52576	3.02687	1.21075	7.60415	2.10415		0.289253	0		7.58317			17	0.5	1.5	4.56512	1.5217	3.17318	1.26928	7.73831	16.5	4.57729	1.52576	3.02686	1.21075	7.60415	2.10415
18	3.67545e-16	1	4.12145	1.37382	3.31288	1.32515	7.43434	17.5	4.33098	1.44366	3.25992	1.30397	7.59091	2.09091		-0.303969	0		7.57556			18	3.67545e-16	1	4.12146	1.37382	3.31288	1.32515	7.43434	17.5	4.33099	1.44366	3.25992	1.30397	7.59091	2.09091
19	-0.5	0.5	3.37835	1.12612	3.2385	1.2954	6.61685	18.5	3.7293	1.2431	3.29372	1.31749	7.02302	1.52302		-0.817488	8.88178e-16		7.01181			19	-0.5	0.5	3.37836	1.12612	3.23849	1.2954	6.61685	18.5	3.72931	1.2431	3.29371	1.31749	7.02302	1.52302
20	-0.866025	0.133975	2.53463	0.844877	2.96897	1.18759	5.5036	19.5	2.9331	0.977699	3.11805	1.24722	6.05115	0.551153		-1.11325	-5.55112e-16		6.04297			20	-0.866025	0.133975	2.53464	0.844877	2.96897	1.18759	5.5036	19.5	2.93311	0.9777	3.11805	1.24722	6.05115	0.551153
21	-1	0	1.81614	0.60538	2.5758	1.03032	4.39195	20.5	2.15546	0.718488	2.77914	1.11166	4.93461	-0.565393		-1.11166	-4.44089e-16		4.92865			21	-1	0	1.81615	0.605381	2.5758	1.03032	4.39195	20.5	2.15547	0.718489	2.77914	1.11166	4.93461	-0.565393
22	-0.866025	0.133975	1.41525	0.471752	2.1638	0.86552	3.57905	21.5	1.60458	0.534861	2.36717	0.946866	3.97175	-1.52825		-0.812892	0		3.96743			22	-0.866025	0.133975	1.41526	0.471753	2.16379	0.86552	3.57905	21.5	1.60459	0.534862	2.36716	0.946866	3.97175	-1.52825
23	-0.5	0.5	1.43928	0.479759	1.84296	0.737183	3.28223	22.5	1.42793	0.475977	1.99205	0.79682	3.41998	-2.08002		-0.29682	0		3.41686			23	-0.5	0.5	1.43928	0.47976	1.84295	0.737183	3.28224	22.5	1.42794	0.475978	1.99204	0.79682	3.41998	-2.08002
24	-4.90059e-16	1	1.88169	0.627231	1.69896	0.679582	3.58065	23.5	1.67275	0.557584	1.75396	0.701585	3.42671	-2.07329		0.298415	0		3.42446			24	-4.90059e-16	1	1.8817	0.627231	1.69895	0.679582	3.58065	23.5	1.67276	0.557584	1.75396	0.701585	3.42672	-2.07329
25	0.5	1.5	2.6239	0.874634	1.77017	0.708067	4.39407	24.5	2.27338	0.757792	1.71645	0.68658	3.98983	-1.51017		0.81342	0		3.98821			25	0.5	1.5	2.62391	0.874634	1.77016	0.708067	4.39407	24.5	2.27338	0.757792	1.71645	0.68658	3.98983	-1.51017
26	0.866025	1.86603	3.46699	1.15566	2.03736	0.814942	5.50434	25.5	3.06882	1.02294	1.88938	0.755753	4.9582	-0.541798		1.11027	0		4.95705			26	0.866025	1.86603	3.46699	1.15566	2.03735	0.814942	5.50434	25.5	3.06882	1.02294	1.88938	0.755753	4.9582	-0.541798
27	1	2	4.18502	1.39501	2.42881	0.971524	6.61383	26.5	3.84591	1.28197	2.22629	0.890514	6.0722	0.572196		1.10949	0		6.07137			27	1	2	4.18502	1.395	2.42881	0.971524	6.61383	26.5	3.84592	1.28197	2.22628	0.890514	6.0722	0.572196
28	0.866025	1.86603	4.58557	1.52852	2.83956	1.13582	7.42514	27.5	4.3964	1.46547	2.63679	1.05472	7.03319	1.53319		0.811309	0		7.0326			28	0.866025	1.86603	4.58558	1.52852	2.83956	1.13582	7.42514	27.5	4.39641	1.46547	2.63678	1.05472	7.03319	1.53319
29	0.5	1.5	4.56132	1.52044	3.15949	1.2638	7.72081	28.5	4.57277	1.52426	3.01083	1.20433	7.5836	2.0836		0.295668	0		7.58317			29	0.5	1.5	4.56132	1.52044	3.15948	1.2638	7.72081	28.5	4.57278	1.52426	3.01082	1.20433	7.5836	2.0836
30	2.38893e-15	1	4.11873	1.37291	3.30282	1.32113	7.42155	29.5	4.32775	1.44258	3.24813	1.29925	7.57588	2.07588		-0.299252	0		7.57556			30	2.38893e-15	1	4.11874	1.37291	3.30281	1.32113	7.42155	29.5	4.32776	1.44258	3.24812	1.29925	7.57588	2.07588
31	-0.5	0.5	3.3764	1.12547	3.23112	1.29245	6.60753	30.5	3.72699	1.24233	3.28507	1.31403	7.01206	1.51206		-0.814028	0		7.01181			31	-0.5	0.5	3.37641	1.12547	3.23111	1.29245	6.60753	30.5	3.72699	1.24233	3.28506	1.31403	7.01206	1.51206
32	-0.866025	0.133975	2.53323	0.844411	2.96358	1.18543	5.49681	31.5	2.93144	0.977147	3.11172	1.24469	6.04316	0.54316		-1.11071	-2.22045e-16		6.04297			32	-0.866025	0.133975	2.53324	0.844411	2.96357	1.18543	5.49681	31.5	2.93145	0.977147	3.11171	1.24469	6.04316	0.54316
33	-1	0	1.81514	0.605047	2.57187	1.02875	4.38701	32.5	2.15428	0.718092	2.77451	1.10981	4.92879	-0.571211		-1.10981	-4.44089e-16		4.92865			33	-1	0	1.81515	0.605048	2.57186	1.02875	4.38701	32.5	2.15428	0.718093	2.77451	1.10981	4.92879	-0.571211
34	-0.866025	0.133975	1.41454	0.471512	2.16093	0.864371	3.57547	33.5	1.60373	0.534577	2.36379	0.945515	3.96752	-1.53248		-0.811541	6.66134e-16		3.96743			34	-0.866025	0.133975	1.41454	0.471513	2.16092	0.864371	3.57547	33.5	1.60374	0.534578	2.36378	0.945515	3.96752	-1.53248
35	-0.5	0.5	1.43876	0.479588	1.84087	0.736347	3.27963	34.5	1.42732	0.475774	1.98959	0.795835	3.41691	-2.08309		-0.295835	0		3.41686			35	-0.5	0.5	1.43877	0.479588	1.84086	0.736347	3.27963	34.5	1.42733	0.475775	1.98958	0.795835	3.41691	-2.08309
36	-7.35089e-16	1	1.88133	0.627108	1.69744	0.678974	3.57876	35.5	1.67231	0.557438	1.75217	0.700869	3.42449	-2.07551		0.299131	0		3.42446			36	-7.35089e-16	1	1.88133	0.627109	1.69743	0.678974	3.57876	35.5	1.67232	0.557439	1.75217	0.700869	3.42449	-2.07551
37	0.5	1.5	2.62364	0.874546	1.76906	0.707626	4.3927	36.5	2.27306	0.757688	1.71515	0.68606	3.98821	-1.51179		0.81394	0		3.98821			37	0.5	1.5	2.62364	0.874546	1.76906	0.707626	4.3927	36.5	2.27307	0.757688	1.71515	0.68606	3.98821	-1.51179
38	0.866025	1.86603	3.4668	1.1556	2.03655	0.814622	5.50335	37.5	3.0686	1.02287	1.88844	0.755375	4.95703	-0.542967		1.11065	0		4.95705			38	0.866025	1.86603	3.4668	1.1556	2.03655	0.814622	5.50335	37.5	3.0686	1.02286	1.88843	0.755375	4.95703	-0.542967
39	1	2	4.18488	1.39496	2.42823	0.971292	6.61311	38.5	3.84575	1.28192	2.2256	0.89024	6.07135	0.57135		1.10976	0		6.07137			39	1	2	4.18489	1.39496	2.42822	0.971292	6.61311	38.5	3.84575	1.28192	2.2256	0.89024	6.07135	0.57135
40	0.866025	1.86603	4.58548	1.52849	2.83914	1.13566	7.42462	39.5	4.39629	1.46543	2.63629	1.05452	7.03258	1.53258		0.811508	0		7.0326			40	0.866025	1.86603	4.58548	1.52849	2.83914	1.13566	7.42462	39.5	4.39629	1.46543	2.63629	1.05452	7.03258	1.53258
41	0.5	1.5	4.56125	1.52042	3.15918	1.26367	7.72043	40.5	4.57269	1.52423	3.01047	1.20419	7.58316	2.08316		0.295812	0		7.58317			41	0.5	1.5	4.56125	1.52042	3.15918	1.26367	7.72043	40.5	4.5727	1.52423	3.01046	1.20419	7.58316	2.08316
42	8.57604e-16	1	4.11868	1.37289	3.3026	1.32104	7.42128	41.5	4.32769	1.44256	3.24787	1.29915	7.57557	2.07557		-0.299148	0		7.57556			42	8.57604e-16	1	4.11869	1.37289	3.30259	1.32104	7.42128	41.5	4.3277	1.44256	3.24786	1.29915	7.57557	2.07556
43	-0.5	0.5	3.37637	1.12546	3.23096	1.29238	6.60733	42.5	3.72694	1.24231	3.28488	1.31395	7.01182	1.51182		-0.813952	8.88178e-16		7.01181			43	-0.5	0.5	3.37638	1.12546	3.23095	1.29238	6.60733	42.5	3.72695	1.24231	3.28487	1.31395	7.01183	1.51182
44	-0.866025	0.133975	2.53321	0.844402	2.96346	1.18539	5.49667	43.5	2.93141	0.977136	3.11158	1.24463	6.04299	0.542994		-1.11066	-3.33067e-16		6.04297			44	-0.866025	0.133975	2.53321	0.844403	2.96346	1.18539	5.49667	43.5	2.93142	0.977137	3.11158	1.24463	6.04299	0.542994
45	-1	0	1.81512	0.605041	2.57178	1.02871	4.3869	44.5	2.15425	0.718085	2.77442	1.10977	4.92867	-0.57133		-1.10977	-4.44089e-16		4.92865			45	-1	0	1.81513	0.605041	2.57178	1.02871	4.38691	44.5	2.15426	0.718085	2.77441	1.10977	4.92867	-0.57133
46	-0.866025	0.133975	1.41452	0.471508	2.16087	0.864347	3.57539	45.5	1.60372	0.534572	2.36372	0.945487	3.96743	-1.53257		-0.811513	0		3.96743			46	-0.866025	0.133975	1.41453	0.471509	2.16086	0.864347	3.57539	45.5	1.60372	0.534573	2.36371	0.945487	3.96743	-1.53257
47	-0.5	0.5	1.43875	0.479585	1.84082	0.736329	3.27958	46.5	1.42731	0.47577	1.98954	0.795815	3.41685	-2.08315		-0.295815	0		3.41686			47	-0.5	0.5	1.43876	0.479585	1.84082	0.736329	3.27958	46.5	1.42732	0.475771	1.98953	0.795815	3.41685	-2.08315
48	-9.80119e-16	1	1.88132	0.627106	1.6974	0.678962	3.57872	47.5	1.67231	0.557436	1.75214	0.700854	3.42444	-2.07556		0.299146	0		3.42446			48	-9.80119e-16	1	1.88132	0.627106	1.6974	0.678962	3.57872	47.5	1.67231	0.557436	1.75213	0.700854	3.42444	-2.07556
49	0.5	1.5	2.62363	0.874544	1.76904	0.707617	4.39267	48.5	2.27306	0.757686	1.71512	0.686049	3.98818	-1.51182		0.813951	0		3.98821			49	0.5	1.5	2.62364	0.874544	1.76904	0.707617	4.39267	48.5	2.27306	0.757686	1.71512	0.686049	3.98818	-1.51182
50	0.866025	1.86603	3.46679	1.1556	2.03654	0.814615	5.50333	49.5	3.06859	1.02286	1.88842	0.755367	4.95701	-0.54299		1.11066	0		4.95705			50	0.866025	1.86603	3.4668	1.1556	2.03653	0.814615	5.50333	49.5	3.0686	1.02286	1.88841	0.755367	4.95701	-0.54299
51	1	2	4.18488	1.39496	2.42822	0.971287	6.6131	50.5	3.84575	1.28192	2.22559	0.890235	6.07133	0.571333		1.10977	0		6.07137			51	1	2	4.18488	1.39496	2.42821	0.971288	6.6131	50.5	3.84575	1.28191	2.22558	0.890235	6.07133	0.571333
52	0.866025	1.86603	4.58548	1.52849	2.83913	1.13565	7.42461	51.5	4.39628	1.46543	2.63628	1.05451	7.03257	1.53257		0.811512	0		7.0326			52	0.866025	1.86603	4.58548	1.52849	2.83913	1.13565	7.42461	51.5	4.39629	1.46543	2.63628	1.05451	7.03257	1.53257
53	0.5	1.5	4.56125	1.52042	3.15918	1.26367	7.72042	52.5	4.57269	1.52423	3.01046	1.20419	7.58315	2.08315		0.295814	0		7.58317			53	0.5	1.5	4.56125	1.52041	3.15917	1.26367	7.72042	52.5	4.5727	1.52423	3.01046	1.20419	7.58315	2.08315
54	4.65535e-15	1	4.11868	1.37289	3.3026	1.32104	7.42128	53.5	4.32769	1.44256	3.24787	1.29915	7.57556	2.07556		-0.299146	0		7.57556			54	4.65535e-15	1	4.11869	1.37289	3.30259	1.32104	7.42128	53.5	4.3277	1.44256	3.24786	1.29915	7.57556	2.07556
55	-0.5	0.5	3.37637	1.12546	3.23096	1.29238	6.60733	54.5	3.72694	1.24231	3.28488	1.31395	7.01182	1.51182		-0.813951	0		7.01181			55	-0.5	0.5	3.37638	1.12546	3.23095	1.29238	6.60733	54.5	3.72695	1.24231	3.28487	1.31395	7.01182	1.51182
56	-0.866025	0.133975	2.53321	0.844402	2.96346	1.18539	5.49667	55.5	2.93141	0.977136	3.11158	1.24463	6.04299	0.542991		-1.11066	6.66134e-16		6.04297			56	-0.866025	0.133975	2.53321	0.844403	2.96346	1.18538	5.49667	55.5	2.93142	0.977137	3.11157	1.24463	6.04299	0.542991
57	-1	0	1.81512	0.60504	2.57178	1.02871	4.3869	56.5	2.15425	0.718085	2.77441	1.10977	4.92867	-0.571333		-1.10977	-6.66134e-16		4.92865			57	-1	0	1.81513	0.605041	2.57178	1.02871	4.3869	56.5	2.15426	0.718085	2.77441	1.10977	4.92867	-0.571333
58	-0.866025	0.133975	1.41452	0.471508	2.16087	0.864347	3.57539	57.5	1.60372	0.534572	2.36372	0.945487	3.96743	-1.53257		-0.811512	-2.22045e-16		3.96743			58	-0.866025	0.133975	1.41453	0.471509	2.16086	0.864347	3.57539	57.5	1.60372	0.534573	2.36371	0.945487	3.96743	-1.53257
59	-0.5	0.5	1.43875	0.479585	1.84082	0.736329	3.27958	58.5	1.42731	0.47577	1.98954	0.795815	3.41685	-2.08315		-0.295815	0		3.41686			59	-0.5	0.5	1.43876	0.479585	1.84082	0.736329	3.27958	58.5	1.42732	0.475771	1.98953	0.795814	3.41685	-2.08315
60	-4.77786e-15	1	1.88132	0.627106	1.6974	0.678962	3.57872	59.5	1.67231	0.557436	1.75213	0.700854	3.42444	-2.07556		0.299146	0		3.42446			60	-4.77786e-15	1	1.88132	0.627106	1.6974	0.678962	3.57872	59.5	1.67231	0.557436	1.75213	0.700854	3.42444	-2.07556
61	0.5	1.5	2.62363	0.874544	1.76904	0.707616	4.39267	60.5	2.27306	0.757686	1.71512	0.686049	3.98818	-1.51182		0.813951	0		3.98821			61	0.5	1.5	2.62364	0.874544	1.76904	0.707616	4.39267	60.5	2.27306	0.757686	1.71512	0.686049	3.98818	-1.51182
62	0.866025	1.86603	3.46679	1.1556	2.03654	0.814615	5.50333	61.5	3.06859	1.02286	1.88842	0.755367	4.95701	-0.542991		1.11066	0		4.95705			62	0.866025	1.86603	3.4668	1.1556	2.03653	0.814615	5.50333	61.5	3.0686	1.02286	1.88841	0.755367	4.95701	-0.542991
63	1	2	4.18488	1.39496	2.42822	0.971287	6.6131	62.5	3.84575	1.28192	2.22559	0.890235	6.07133	0.571333		1.10977	0		6.07137			63	1	2	4.18488	1.39496	2.42821	0.971287	6.6131	62.5	3.84575	1.28191	2.22558	0.890235	6.07133	0.571333
64	0.866025	1.86603	4.58548	1.52849	2.83913	1.13565	7.42461	63.5	4.39628	1.46543	2.63628	1.05451	7.03257	1.53257		0.811512	0		7.0326			64	0.866025	1.86603	4.58548	1.52849	2.83913	1.13565	7.42461	63.5	4.39629	1.46543	2.63628	1.05451	7.03257	1.53257
65	0.5	1.5	4.56125	1.52042	3.15918	1.26367	7.72042	64.5	4.57269	1.52423	3.01046	1.20419	7.58315	2.08315		0.295815	0		7.58317			65	0.5	1.5	4.56125	1.52041	3.15917	1.26367	7.72042	64.5	4.5727	1.52423	3.01046	1.20419	7.58315	2.08315
66	4.90038e-15	1	4.11868	1.37289	3.3026	1.32104	7.42128	65.5	4.32769	1.44256	3.24787	1.29915	7.57556	2.07556		-0.299146	0		7.57556			66	4.90038e-15	1	4.11869	1.37289	3.30259	1.32104	7.42128	65.5	4.3277	1.44256	3.24786	1.29915	7.57556	2.07556
67	-0.5	0.5	3.37637	1.12546	3.23096	1.29238	6.60733	66.5	3.72694	1.24231	3.28488	1.31395	7.01182	1.51182		-0.813951	0		7.01181			67	-0.5	0.5	3.37638	1.12546	3.23095	1.29238	6.60733	66.5	3.72695	1.24231	3.28487	1.31395	7.01182	1.51182
68	-0.866025	0.133975	2.53321	0.844402	2.96346	1.18538	5.49667	67.5	2.93141	0.977136	3.11158	1.24463	6.04299	0.542991		-1.11066	0		6.04297			68	-0.866025	0.133975	2.53321	0.844403	2.96346	1.18538	5.49667	67.5	2.93142	0.977137	3.11157	1.24463	6.04299	0.542991
69	-1	0	1.81512	0.60504	2.57178	1.02871	4.3869	68.5	2.15425	0.718085	2.77441	1.10977	4.92867	-0.571333		-1.10977	2.22045e-16		4.92865			69	-1	0	1.81513	0.605041	2.57178	1.02871	4.3869	68.5	2.15426	0.718085	2.77441	1.10977	4.92867	-0.571333
70	-0.866025	0.133975	1.41452	0.471508	2.16087	0.864347	3.57539	69.5	1.60372	0.534572	2.36372	0.945487	3.96743	-1.53257		-0.811512	2.22045e-16		3.96743			70	-0.866025	0.133975	1.41453	0.471509	2.16086	0.864347	3.57539	69.5	1.60372	0.534573	2.36371	0.945487	3.96743	-1.53257
71	-0.5	0.5	1.43875	0.479585	1.84082	0.736329	3.27958	70.5	1.42731	0.47577	1.98954	0.795815	3.41685	-2.08315		-0.295815	-4.44089e-16		3.41686			71	-0.5	0.5	1.43876	0.479585	1.84082	0.736329	3.27958	70.5	1.42732	0.475771	1.98953	0.795814	3.41685	-2.08315
72	-1.47018e-15	1	1.88132	0.627106	1.6974	0.678962	3.57872	71.5	1.67231	0.557436	1.75213	0.700854	3.42444	-2.07556		0.299146	0		3.42446			72	-1.47018e-15	1	1.88132	0.627106	1.6974	0.678962	3.57872	71.5	1.67231	0.557436	1.75213	0.700854	3.42444	-2.07556
73	0.5	1.5	2.62363	0.874544	1.76904	0.707616	4.39267	72.5	2.27306	0.757686	1.71512	0.686049	3.98818	-1.51182		0.813951	0		3.98821			73	0.5	1.5	2.62364	0.874544	1.76904	0.707616	4.39267	72.5	2.27306	0.757686	1.71512	0.686049	3.98818	-1.51182
74	0.866025	1.86603	3.46679	1.1556	2.03654	0.814615	5.50333	73.5	3.06859	1.02286	1.88842	0.755367	4.95701	-0.542991		1.11066	0		4.95705			74	0.866025	1.86603	3.4668	1.1556	2.03653	0.814615	5.50333	73.5	3.0686	1.02286	1.88841	0.755367	4.95701	-0.542991
75	1	2	4.18488	1.39496	2.42822	0.971287	6.6131	74.5	3.84575	1.28192	2.22559	0.890235	6.07133	0.571333		1.10977	0		6.07137			75	1	2	4.18488	1.39496	2.42821	0.971287	6.6131	74.5	3.84575	1.28191	2.22558	0.890235	6.07133	0.571333
76	0.866025	1.86603	4.58548	1.52849	2.83913	1.13565	7.42461	75.5	4.39628	1.46543	2.63628	1.05451	7.03257	1.53257		0.811512	0		7.0326			76	0.866025	1.86603	4.58548	1.52849	2.83913	1.13565	7.42461	75.5	4.39629	1.46543	2.63628	1.05451	7.03257	1.53257
77	0.5	1.5	4.56125	1.52042	3.15918	1.26367	7.72042	76.5	4.57269	1.52423	3.01046	1.20419	7.58315	2.08315		0.295815	0		7.58317			77	0.5	1.5	4.56125	1.52041	3.15917	1.26367	7.72042	76.5	4.5727	1.52423	3.01046	1.20419	7.58315	2.08315
78	5.14541e-15	1	4.11868	1.37289	3.3026	1.32104	7.42128	77.5	4.32769	1.44256	3.24787	1.29915	7.57556	2.07556		-0.299146	0		7.57556			78	5.14541e-15	1	4.11869	1.37289	3.30259	1.32104	7.42128	77.5	4.3277	1.44256	3.24786	1.29915	7.57556	2.07556
79	-0.5	0.5	3.37637	1.12546	3.23096	1.29238	6.60733	78.5	3.72694	1.24231	3.28488	1.31395	7.01182	1.51182		-0.813951	0		7.01181			79	-0.5	0.5	3.37638	1.12546	3.23095	1.29238	6.60733	78.5	3.72695	1.24231	3.28487	1.31395	7.01182	1.51182
80	-0.866025	0.133975	2.53321	0.844402	2.96346	1.18538	5.49667	79.5	2.93141	0.977136	3.11158	1.24463	6.04299	0.542991		-1.11066	-4.44089e-16		6.04297			80	-0.866025	0.133975	2.53321	0.844403	2.96346	1.18538	5.49667	79.5	2.93142	0.977137	3.11157	1.24463	6.04299	0.542991
81	-1	0	1.81512	0.60504	2.57178	1.02871	4.3869	80.5	2.15425	0.718085	2.77441	1.10977	4.92867	-0.571333		-1.10977	8.88178e-16		4.92865			81	-1	0	1.81513	0.605041	2.57178	1.02871	4.3869	80.5	2.15426	0.718085	2.77441	1.10977	4.92867	-0.571333
82	-0.866025	0.133975	1.41452	0.471508	2.16087	0.864347	3.57539	81.5	1.60372	0.534572	2.36372	0.945487	3.96743	-1.53257		-0.811512	-3.33067e-16		3.96743			82	-0.866025	0.133975	1.41453	0.471509	2.16086	0.864347	3.57539	81.5	1.60372	0.534573	2.36371	0.945487	3.96743	-1.53257
83	-0.5	0.5	1.43875	0.479585	1.84082	0.736329	3.27958	82.5	1.42731	0.47577	1.98954	0.795815	3.41685	-2.08315		-0.295815	0		3.41686			83	-0.5	0.5	1.43876	0.479585	1.84082	0.736329	3.27958	82.5	1.42732	0.475771	1.98953	0.795814	3.41685	-2.08315
84	-1.71521e-15	1	1.88132	0.627106	1.6974	0.678962	3.57872	83.5	1.67231	0.557436	1.75213	0.700854	3.42444	-2.07556		0.299146	0		3.42446			84	-1.71521e-15	1	1.88132	0.627106	1.6974	0.678962	3.57872	83.5	1.67231	0.557436	1.75213	0.700854	3.42444	-2.07556
85	0.5	1.5	2.62363	0.874544	1.76904	0.707616	4.39267	84.5	2.27306	0.757686	1.71512	0.686049	3.98818	-1.51182		0.813951	0		3.98821			85	0.5	1.5	2.62364	0.874544	1.76904	0.707616	4.39267	84.5	2.27306	0.757686	1.71512	0.686049	3.98818	-1.51182
86	0.866025	1.86603	3.46679	1.1556	2.03654	0.814615	5.50333	85.5	3.06859	1.02286	1.88842	0.755367	4.95701	-0.542991		1.11066	0		4.95705			86	0.866025	1.86603	3.4668	1.1556	2.03653	0.814615	5.50333	85.5	3.0686	1.02286	1.88841	0.755367	4.95701	-0.542991
87	1	2	4.18488	1.39496	2.42822	0.971287	6.6131	86.5	3.84575	1.28192	2.22559	0.890235	6.07133	0.571333		1.10977	0		6.07137			87	1	2	4.18488	1.39496	2.42821	0.971287	6.6131	86.5	3.84575	1.28191	2.22558	0.890235	6.07133	0.571333
88	0.866025	1.86603	4.58548	1.52849	2.83913	1.13565	7.42461	87.5	4.39628	1.46543	2.63628	1.05451	7.03257	1.53257		0.811512	0		7.0326			88	0.866025	1.86603	4.58548	1.52849	2.83913	1.13565	7.42461	87.5	4.39629	1.46543	2.63628	1.05451	7.03257	1.53257
89	0.5	1.5	4.56125	1.52042	3.15918	1.26367	7.72042	88.5	4.57269	1.52423	3.01046	1.20419	7.58315	2.08315		0.295815	0		7.58317			89	0.5	1.5	4.56125	1.52041	3.15917	1.26367	7.72042	88.5	4.5727	1.52423	3.01046	1.20419	7.58315	2.08315
90	5.39044e-15	1	4.11868	1.37289	3.3026	1.32104	7.42128	89.5	4.32769	1.44256	3.24787	1.29915	7.57556	2.07556		-0.299146	0		7.57556			90	5.39044e-15	1	4.11869	1.37289	3.30259	1.32104	7.42128	89.5	4.3277	1.44256	3.24786	1.29915	7.57556	2.07556
91	-0.5	0.5	3.37637	1.12546	3.23096	1.29238	6.60733	90.5	3.72694	1.24231	3.28488	1.31395	7.01182	1.51182		-0.813951	0		7.01181			91	-0.5	0.5	3.37638	1.12546	3.23095	1.29238	6.60733	90.5	3.72695	1.24231	3.28487	1.31395	7.01182	1.51182
92	-0.866025	0.133975	2.53321	0.844402	2.96346	1.18538	5.49667	91.5	2.93141	0.977136	3.11158	1.24463	6.04299	0.542991		-1.11066	-7.77156e-16		6.04297			92	-0.866025	0.133975	2.53321	0.844403	2.96346	1.18538	5.49667	91.5	2.93142	0.977137	3.11157	1.24463	6.04299	0.542991
93	-1	0	1.81512	0.60504	2.57178	1.02871	4.3869	92.5	2.15425	0.718085	2.77441	1.10977	4.92867	-0.571333		-1.10977	4.44089e-16		4.92865			93	-1	0	1.81513	0.605041	2.57178	1.02871	4.3869	92.5	2.15426	0.718085	2.77441	1.10977	4.92867	-0.571333
94	-0.866025	0.133975	1.41452	0.471508	2.16087	0.864347	3.57539	93.5	1.60372	0.534572	2.36372	0.945487	3.96743	-1.53257		-0.811512	-2.22045e-16		3.96743			94	-0.866025	0.133975	1.41453	0.471509	2.16086	0.864347	3.57539	93.5	1.60372	0.534573	2.36371	0.945487	3.96743	-1.53257
95	-0.5	0.5	1.43875	0.479585	1.84082	0.736329	3.27958	94.5	1.42731	0.47577	1.98954	0.795815	3.41685	-2.08315		-0.295815	0		3.41686			95	-0.5	0.5	1.43876	0.479585	1.84082	0.736329	3.27958	94.5	1.42732	0.475771	1.98953	0.795814	3.41685	-2.08315
96	-1.96024e-15	1	1.88132	0.627106	1.6974	0.678962	3.57872	95.5	1.67231	0.557436	1.75213	0.700854	3.42444	-2.07556		0.299146	0		3.42446			96	-1.96024e-15	1	1.88132	0.627106	1.6974	0.678962	3.57872	95.5	1.67231	0.557436	1.75213	0.700854	3.42444	-2.07556
97	0.5	1.5	2.62363	0.874544	1.76904	0.707616	4.39267	96.5	2.27306	0.757686	1.71512	0.686049	3.98818	-1.51182		0.813951	0		3.98821			97	0.5	1.5	2.62364	0.874544	1.76904	0.707616	4.39267	96.5	2.27306	0.757686	1.71512	0.686049	3.98818	-1.51182
98	0.866025	1.86603	3.46679	1.1556	2.03654	0.814615	5.50333	97.5	3.06859	1.02286	1.88842	0.755367	4.95701	-0.542991		1.11066	0		4.95705			98	0.866025	1.86603	3.4668	1.1556	2.03653	0.814615	5.50333	97.5	3.0686	1.02286	1.88841	0.755367	4.95701	-0.542991
99	1	2	4.18488	1.39496	2.42822	0.971287	6.6131	98.5	3.84575	1.28192	2.22559	0.890235	6.07133	0.571333		1.10977	0		6.07137			99	1	2	4.18488	1.39496	2.42821	0.971287	6.6131	98.5	3.84575	1.28191	2.22558	0.890235	6.07133	0.571333
100	0.866025	1.86603	4.58548	1.52849	2.83913	1.13565	7.42461	99.5	4.39628	1.46543	2.63628	1.05451	7.03257	1.53257		0.811512	0		7.0326			100	0.866025	1.86603	4.58548	1.52849	2.83913	1.13565	7.42461	99.5	4.39629	1.46543	2.63628	1.05451	7.03257	1.53257
101	0.5	1.5	4.56125	1.52042	3.15918	1.26367	7.72042	100.5	4.57269	1.52423	3.01046	1.20419	7.58315	2.08315		0.295815	0		7.58317			101	0.5	1.5	4.56125	1.52041	3.15917	1.26367	7.72042	100.5	4.5727	1.52423	3.01046	1.20419	7.58315	2.08315
102	5.63547e-15	1	4.11868	1.37289	3.3026	1.32104	7.42128	101.5	4.32769	1.44256	3.24787	1.29915	7.57556	2.07556		-0.299146	0		7.57556			102	5.63547e-15	1	4.11869	1.37289	3.30259	1.32104	7.42128	101.5	4.3277	1.44256	3.24786	1.29915	7.57556	2.07556
103	-0.5	0.5	3.37637	1.12546	3.23096	1.29238	6.60733	102.5	3.72694	1.24231	3.28488	1.31395	7.01182	1.51182		-0.813951	9.99201e-16		7.01181			103	-0.5	0.5	3.37638	1.12546	3.23095	1.29238	6.60733	102.5	3.72695	1.24231	3.28487	1.31395	7.01182	1.51182
104	-0.866025	0.133975	2.53321	0.844402	2.96346	1.18538	5.49667	103.5	2.93141	0.977136	3.11158	1.24463	6.04299	0.542991		-1.11066	1.11022e-15		6.04297			104	-0.866025	0.133975	2.53321	0.844403	2.96346	1.18538	5.49667	103.5	2.93142	0.977137	3.11157	1.24463	6.04299	0.542991
105	-1	0	1.81512	0.60504	2.57178	1.02871	4.3869	104.5	2.15425	0.718085	2.77441	1.10977	4.92867	-0.571333		-1.10977	-6.66134e-16		4.92865			105	-1	0	1.81513	0.605041	2.57178	1.02871	4.3869	104.5	2.15426	0.718085	2.77441	1.10977	4.92867	-0.571333
106	-0.866025	0.133975	1.41452	0.471508	2.16087	0.864347	3.57539	105.5	1.60372	0.534572	2.36372	0.945487	3.96743	-1.53257		-0.811512	0		3.96743			106	-0.866025	0.133975	1.41453	0.471509	2.16086	0.864347	3.57539	105.5	1.60372	0.534573	2.36371	0.945487	3.96743	-1.53257
107	-0.5	0.5	1.43875	0.479585	1.84082	0.736329	3.27958	106.5	1.42731	0.47577	1.98954	0.795815	3.41685	-2.08315		-0.295815	-4.44089e-16		3.41686			107	-0.5	0.5	1.43876	0.479585	1.84082	0.736329	3.27958	106.5	1.42732	0.475771	1.98953	0.795814	3.41685	-2.08315
108	-9.31069e-15	1	1.88132	0.627106	1.6974	0.678962	3.57872	107.5	1.67231	0.557436	1.75213	0.700854	3.42444	-2.07556		0.299146	0		3.42446			108	-9.31069e-15	1	1.88132	0.627106	1.6974	0.678962	3.57872	107.5	1.67231	0.557436	1.75213	0.700854	3.42444	-2.07556
109	0.5	1.5	2.62363	0.874544	1.76904	0.707616	4.39267	108.5	2.27306	0.757686	1.71512	0.686049	3.98818	-1.51182		0.813951	0		3.98821			109	0.5	1.5	2.62364	0.874544	1.76904	0.707616	4.39267	108.5	2.27306	0.757686	1.71512	0.686049	3.98818	-1.51182
110	0.866025	1.86603	3.46679	1.1556	2.03654	0.814615	5.50333	109.5	3.06859	1.02286	1.88842	0.755367	4.95701	-0.542991		1.11066	0		4.95705			110	0.866025	1.86603	3.4668	1.1556	2.03653	0.814615	5.50333	109.5	3.0686	1.02286	1.88841	0.755367	4.95701	-0.542991
111	1	2	4.18488	1.39496	2.42822	0.971287	6.6131	110.5	3.84575	1.28192	2.22559	0.890235	6.07133	0.571333		1.10977	0		6.07137			111	1	2	4.18488	1.39496	2.42821	0.971287	6.6131	110.5	3.84575	1.28191	2.22558	0.890235	6.07133	0.571333
112	0.866025	1.86603	4.58548	1.52849	2.83913	1.13565	7.42461	111.5	4.39628	1.46543	2.63628	1.05451	7.03257	1.53257		0.811512	0		7.0326			112	0.866025	1.86603	4.58548	1.52849	2.83913	1.13565	7.42461	111.5	4.39629	1.46543	2.63628	1.05451	7.03257	1.53257
113	0.5	1.5	4.56125	1.52042	3.15918	1.26367	7.72042	112.5	4.57269	1.52423	3.01046	1.20419	7.58315	2.08315		0.295815	0		7.58317			113	0.5	1.5	4.56125	1.52041	3.15917	1.26367	7.72042	112.5	4.5727	1.52423	3.01046	1.20419	7.58315	2.08315
114	5.8805e-15	1	4.11868	1.37289	3.3026	1.32104	7.42128	113.5	4.32769	1.44256	3.24787	1.29915	7.57556	2.07556		-0.299146	0		7.57556			114	5.8805e-15	1	4.11869	1.37289	3.30259	1.32104	7.42128	113.5	4.3277	1.44256	3.24786	1.29915	7.57556	2.07556
115	-0.5	0.5	3.37637	1.12546	3.23096	1.29238	6.60733	114.5	3.72694	1.24231	3.28488	1.31395	7.01182	1.51182		-0.813951	8.88178e-16		7.01181			115	-0.5	0.5	3.37638	1.12546	3.23095	1.29238	6.60733	114.5	3.72695	1.24231	3.28487	1.31395	7.01182	1.51182
116	-0.866025	0.133975	2.53321	0.844402	2.96346	1.18538	5.49667	115.5	2.93141	0.977136	3.11158	1.24463	6.04299	0.542991		-1.11066	-2.22045e-16		6.04297			116	-0.866025	0.133975	2.53321	0.844403	2.96346	1.18538	5.49667	115.5	2.93142	0.977137	3.11157	1.24463	6.04299	0.542991
117	-1	0	1.81512	0.60504	2.57178	1.02871	4.3869	116.5	2.15425	0.718085	2.77441	1.10977	4.92867	-0.571333		-1.10977	0		4.92865			117	-1	0	1.81513	0.605041	2.57178	1.02871	4.3869	116.5	2.15426	0.718085	2.77441	1.10977	4.92867	-0.571333
118	-0.866025	0.133975	1.41452	0.471508	2.16087	0.864347	3.57539	117.5	1.60372	0.534572	2.36372	0.945487	3.96743	-1.53257		-0.811512	-5.55112e-16		3.96743			118	-0.866025	0.133975	1.41453	0.471509	2.16086	0.864347	3.57539	117.5	1.60372	0.534573	2.36371	0.945487	3.96743	-1.53257
119	-0.5	0.5	1.43875	0.479585	1.84082	0.736329	3.27958	118.5	1.42731	0.47577	1.98954	0.795815	3.41685	-2.08315		-0.295815	-4.44089e-16		3.41686			119	-0.5	0.5	1.43876	0.479585	1.84082	0.736329	3.27958	118.5	1.42732	0.475771	1.98953	0.795814	3.41685	-2.08315
120	-9.55572e-15	1	1.88132	0.627106	1.6974	0.678962	3.57872	119.5	1.67231	0.557436	1.75213	0.700854	3.42444	-2.07556		0.299146	0		3.42446			120	-9.55572e-15	1	1.88132	0.627106	1.6974	0.678962	3.57872	119.5	1.67231	0.557436	1.75213	0.700854	3.42444	-2.07556
121	0.5	1.5	2.62363	0.874544	1.76904	0.707616	4.39267	120.5	2.27306	0.757686	1.71512	0.686049	3.98818	-1.51182		0.813951	0		3.98821			121	0.5	1.5	2.62364	0.874544	1.76904	0.707616	4.39267	120.5	2.27306	0.757686	1.71512	0.686049	3.98818	-1.51182
122	0.866025	1.86603	3.46679	1.1556	2.03654	0.814615	5.50333	121.5	3.06859	1.02286	1.88842	0.755367	4.95701	-0.542991		1.11066	0		4.95705			122	0.866025	1.86603	3.4668	1.1556	2.03653	0.814615	5.50333	121.5	3.0686	1.02286	1.88841	0.755367	4.95701	-0.542991
123	1	2	4.18488	1.39496	2.42822	0.971287	6.6131	122.5	3.84575	1.28192	2.22559	0.890235	6.07133	0.571333		1.10977	0		6.07137			123	1	2	4.18488	1.39496	2.42821	0.971287	6.6131	122.5	3.84575	1.28191	2.22558	0.890235	6.07133	0.571333
124	0.866025	1.86603	4.58548	1.52849	2.83913	1.13565	7.42461	123.5	4.39628	1.46543	2.63628	1.05451	7.03257	1.53257		0.811512	0		7.0326			124	0.866025	1.86603	4.58548	1.52849	2.83913	1.13565	7.42461	123.5	4.39629	1.46543	2.63628	1.05451	7.03257	1.53257
125	0.5	1.5	4.56125	1.52042	3.15918	1.26367	7.72042	124.5	4.57269	1.52423	3.01046	1.20419	7.58315	2.08315		0.295815	0		7.58317			125	0.5	1.5	4.56125	1.52041	3.15917	1.26367	7.72042	124.5	4.5727	1.52423	3.01046	1.20419	7.58315	2.08315
126	1.3231e-14	1	4.11868	1.37289	3.3026	1.32104	7.42128	125.5	4.32769	1.44256	3.24787	1.29915	7.57556	2.07556		-0.299146	0		7.57556			126	1.3231e-14	1	4.11869	1.37289	3.30259	1.32104	7.42128	125.5	4.3277	1.44256	3.24786	1.29915	7.57556	2.07556
127	-0.5	0.5	3.37637	1.12546	3.23096	1.29238	6.60733	126.5	3.72694	1.24231	3.28488	1.31395	7.01182	1.51182		-0.813951	0		7.01181			127	-0.5	0.5	3.37638	1.12546	3.23095	1.29238	6.60733	126.5	3.72695	1.24231	3.28487	1.31395	7.01182	1.51182
128	-0.866025	0.133975	2.53321	0.844402	2.96346	1.18538	5.49667	127.5	2.93141	0.977136	3.11158	1.24463	6.04299	0.542991		-1.11066	7.77156e-16		6.04297			128	-0.866025	0.133975	2.53321	0.844403	2.96346	1.18538	5.49667	127.5	2.93142	0.977137	3.11157	1.24463	6.04299	0.542991
129	-1	0	1.81512	0.60504	2.57178	1.02871	4.3869	128.5	2.15425	0.718085	2.77441	1.10977	4.92867	-0.571333		-1.10977	-8.88178e-16		4.92865			129	-1	0	1.81513	0.605041	2.57178	1.02871	4.3869	128.5	2.15426	0.718085	2.77441	1.10977	4.92867	-0.571333
130	-0.866025	0.133975	1.41452	0.471508	2.16087	0.864347	3.57539	129.5	1.60372	0.534572	2.36372	0.945487	3.96743	-1.53257		-0.811512	5.55112e-16		3.96743			130	-0.866025	0.133975	1.41453	0.471509	2.16086	0.864347	3.57539	129.5	1.60372	0.534573	2.36371	0.945487	3.96743	-1.53257
131	-0.5	0.5	1.43875	0.479585	1.84082	0.736329	3.27958	130.5	1.42731	0.47577	1.98954	0.795815	3.41685	-2.08315		-0.295815	0		3.41686			131	-0.5	0.5	1.43876	0.479585	1.84082	0.736329	3.27958	130.5	1.42732	0.475771	1.98953	0.795814	3.41685	-2.08315
132	-9.80075e-15	1	1.88132	0.627106	1.6974	0.678962	3.57872	131.5	1.67231	0.557436	1.75213	0.700854	3.42444	-2.07556		0.299146	0		3.42446			132	-9.80075e-15	1	1.88132	0.627106	1.6974	0.678962	3.57872	131.5	1.67231	0.557436	1.75213	0.700854	3.42444	-2.07556
133	0.5	1.5	2.62363	0.874544	1.76904	0.707616	4.39267	132.5	2.27306	0.757686	1.71512	0.686049	3.98818	-1.51182		0.813951	0		3.98821			133	0.5	1.5	2.62364	0.874544	1.76904	0.707616	4.39267	132.5	2.27306	0.757686	1.71512	0.686049	3.98818	-1.51182
134	0.866025	1.86603	3.46679	1.1556	2.03654	0.814615	5.50333	133.5	3.06859	1.02286	1.88842	0.755367	4.95701	-0.542991		1.11066	0		4.95705			134	0.866025	1.86603	3.4668	1.1556	2.03653	0.814615	5.50333	133.5	3.0686	1.02286	1.88841	0.755367	4.95701	-0.542991
135	1	2	4.18488	1.39496	2.42822	0.971287	6.6131	134.5	3.84575	1.28192	2.22559	0.890235	6.07133	0.571333		1.10977	0		6.07137			135	1	2	4.18488	1.39496	2.42821	0.971287	6.6131	134.5	3.84575	1.28191	2.22558	0.890235	6.07133	0.571333
136	0.866025	1.86603	4.58548	1.52849	2.83913	1.13565	7.42461	135.5	4.39628	1.46543	2.63628	1.05451	7.03257	1.53257		0.811512	0		7.0326			136	0.866025	1.86603	4.58548	1.52849	2.83913	1.13565	7.42461	135.5	4.39629	1.46543	2.63628	1.05451	7.03257	1.53257
137	0.5	1.5	4.56125	1.52042	3.15918	1.26367	7.72042	136.5	4.57269	1.52423	3.01046	1.20419	7.58315	2.08315		0.295815	0		7.58317			137	0.5	1.5	4.56125	1.52041	3.15917	1.26367	7.72042	136.5	4.5727	1.52423	3.01046	1.20419	7.58315	2.08315
138	6.37056e-15	1	4.11868	1.37289	3.3026	1.32104	7.42128	137.5	4.32769	1.44256	3.24787	1.29915	7.57556	2.07556		-0.299146	0		7.57556			138	6.37056e-15	1	4.11869	1.37289	3.30259	1.32104	7.42128	137.5	4.3277	1.44256	3.24786	1.29915	7.57556	2.07556
139	-0.5	0.5	3.37637	1.12546	3.23096	1.29238	6.60733	138.5	3.72694	1.24231	3.28488	1.31395	7.01182	1.51182		-0.813951	0		7.01181			139	-0.5	0.5	3.37638	1.12546	3.23095	1.29238	6.60733	138.5	3.72695	1.24231	3.28487	1.31395	7.01182	1.51182
140	-0.866025	0.133975	2.53321	0.844402	2.96346	1.18538	5.49667	139.5	2.93141	0.977136	3.11158	1.24463	6.04299	0.542991		-1.11066	2.22045e-16		6.04297			140	-0.866025	0.133975	2.53321	0.844403	2.96346	1.18538	5.49667	139.5	2.93142	0.977137	3.11157	1.24463	6.04299	0.542991
141	-1	0	1.81512	0.60504	2.57178	1.02871	4.3869	140.5	2.15425	0.718085	2.77441	1.10977	4.92867	-0.571333		-1.10977	6.66134e-16		4.92865			141	-1	0	1.81513	0.605041	2.57178	1.02871	4.3869	140.5	2.15426	0.718085	2.77441	1.10977	4.92867	-0.571333
142	-0.866025	0.133975	1.41452	0.471508	2.16087	0.864347	3.57539	141.5	1.60372	0.534572	2.36372	0.945487	3.96743	-1.53257		-0.811512	-4.44089e-16		3.96743			142	-0.866025	0.133975	1.41453	0.471509	2.16086	0.864347	3.57539	141.5	1.60372	0.534573	2.36371	0.945487	3.96743	-1.53257
143	-0.5	0.5	1.43875	0.479585	1.84082	0.736329	3.27958	142.5	1.42731	0.47577	1.98954	0.795815	3.41685	-2.08315		-0.295815	-4.44089e-16		3.41686			143	-0.5	0.5	1.43876	0.479585	1.84082	0.736329	3.27958	142.5	1.42732	0.475771	1.98953	0.795814	3.41685	-2.08315
144	-2.94036e-15	1	1.88132	0.627106	1.6974	0.678962	3.57872	143.5	1.67231	0.557436	1.75213	0.700854	3.42444	-2.07556		0.299146	0		3.42446			144	-2.94036e-15	1	1.88132	0.627106	1.6974	0.678962	3.57872	143.5	1.67231	0.557436	1.75213	0.700854	3.42444	-2.07556
145	0.5	1.5	2.62363	0.874544	1.76904	0.707616	4.39267	144.5	2.27306	0.757686	1.71512	0.686049	3.98818	-1.51182		0.813951	0		3.98821			145	0.5	1.5	2.62364	0.874544	1.76904	0.707616	4.39267	144.5	2.27306	0.757686	1.71512	0.686049	3.98818	-1.51182
146	0.866025	1.86603	3.46679	1.1556	2.03654	0.814615	5.50333	145.5	3.06859	1.02286	1.88842	0.755367	4.95701	-0.542991		1.11066	0		4.95705			146	0.866025	1.86603	3.4668	1.1556	2.03653	0.814615	5.50333	145.5	3.0686	1.02286	1.88841	0.755367	4.95701	-0.542991
147	1	2	4.18488	1.39496	2.42822	0.971287	6.6131	146.5	3.84575	1.28192	2.22559	0.890235	6.07133	0.571333		1.10977	0		6.07137			147	1	2	4.18488	1.39496	2.42821	0.971287	6.6131	146.5	3.84575	1.28191	2.22558	0.890235	6.07133	0.571333
148	0.866025	1.86603	4.58548	1.52849	2.83913	1.13565	7.42461	147.5	4.39628	1.46543	2.63628	1.05451	7.03257	1.53257		0.811512	0		7.0326			148	0.866025	1.86603	4.58548	1.52849	2.83913	1.13565	7.42461	147.5	4.39629	1.46543	2.63628	1.05451	7.03257	1.53257
149	0.5	1.5	4.56125	1.52042	3.15918	1.26367	7.72042	148.5	4.57269	1.52423	3.01046	1.20419	7.58315	2.08315		0.295815	0		7.58317			149	0.5	1.5	4.56125	1.52041	3.15917	1.26367	7.72042	148.5	4.5727	1.52423	3.01046	1.20419	7.58315	2.08315
150	1.3721e-14	1	4.11868	1.37289	3.3026	1.32104	7.42128	149.5	4.32769	1.44256	3.24787	1.29915	7.57556	2.07556		-0.299146	0		7.57556			150	1.3721e-14	1	4.11869	1.37289	3.30259	1.32104	7.42128	149.5	4.3277	1.44256	3.24786	1.29915	7.57556	2.07556
151	-0.5	0.5	3.37637	1.12546	3.23096	1.29238	6.60733	150.5	3.72694	1.24231	3.28488	1.31395	7.01182	1.51182		-0.813951	0		7.01181			151	-0.5	0.5	3.37638	1.12546	3.23095	1.29238	6.60733	150.5	3.72695	1.24231	3.28487	1.31395	7.01182	1.51182
152	-0.866025	0.133975	2.53321	0.844402	2.96346	1.18538	5.49667	151.5	2.93141	0.977136	3.11158	1.24463	6.04299	0.542991		-1.11066	3.33067e-16		6.04297			152	-0.866025	0.133975	2.53321	0.844403	2.96346	1.18538	5.49667	151.5	2.93142	0.977137	3.11157	1.24463	6.04299	0.542991
153	-1	0	1.81512	0.60504	2.57178	1.02871	4.3869	152.5	2.15425	0.718085	2.77441	1.10977	4.92867	-0.571333		-1.10977	2.22045e-16		4.92865			153	-1	0	1.81513	0.605041	2.57178	1.02871	4.3869	152.5	2.15426	0.718085	2.77441	1.10977	4.92867	-0.571333
154	-0.866025	0.133975	1.41452	0.471508	2.16087	0.864347	3.57539	153.5	1.60372	0.534572	2.36372	0.945487	3.96743	-1.53257		-0.811512	5.55112e-16		3.96743			154	-0.866025	0.133975	1.41453	0.471509	2.16086	0.864347	3.57539	153.5	1.60372	0.534573	2.36371	0.945487	3.96743	-1.53257
155	-0.5	0.5	1.43875	0.479585	1.84082	0.736329	3.27958	154.5	1.42731	0.47577	1.98954	0.795815	3.41685	-2.08315		-0.295815	0		3.41686			155	-0.5	0.5	1.43876	0.479585	1.84082	0.736329	3.27958	154.5	1.42732	0.475771	1.98953	0.795814	3.41685	-2.08315
156	-1.02908e-14	1	1.88132	0.627106	1.6974	0.678962	3.57872	155.5	1.67231	0.557436	1.75213	0.700854	3.42444	-2.07556		0.299146	0		3.42446			156	-1.02908e-14	1	1.88132	0.627106	1.6974	0.678962	3.57872	155.5	1.67231	0.557436	1.75213	0.700854	3.42444	-2.07556
157	0.5	1.5	2.62363	0.874544	1.76904	0.707616	4.39267	156.5	2.27306	0.757686	1.71512	0.686049	3.98818	-1.51182		0.813951	0		3.98821			157	0.5	1.5	2.62364	0.874544	1.76904	0.707616	4.39267	156.5	2.27306	0.757686	1.71512	0.686049	3.98818	-1.51182
158	0.866025	1.86603	3.46679	1.1556	2.03654	0.814615	5.50333	157.5	3.06859	1.02286	1.88842	0.755367	4.95701	-0.542991		1.11066	0		4.95705			158	0.866025	1.86603	3.4668	1.1556	2.03653	0.814615	5.50333	157.5	3.0686	1.02286	1.88841	0.755367	4.95701	-0.542991
159	1	2	4.18488	1.39496	2.42822	0.971287	6.6131	158.5	3.84575	1.28192	2.22559	0.890235	6.07133	0.571333		1.10977	0		6.07137			159	1	2	4.18488	1.39496	2.42821	0.971287	6.6131	158.5	3.84575	1.28191	2.22558	0.890235	6.07133	0.571333
160	0.866025	1.86603	4.58548	1.52849	2.83913	1.13565	7.42461	159.5	4.39628	1.46543	2.63628	1.05451	7.03257	1.53257		0.811512	0		7.0326			160	0.866025	1.86603	4.58548	1.52849	2.83913	1.13565	7.42461	159.5	4.39629	1.46543	2.63628	1.05451	7.03257	1.53257
161	0.5	1.5	4.56125	1.52042	3.15918	1.26367	7.72042	160.5	4.57269	1.52423	3.01046	1.20419	7.58315	2.08315		0.295815	0		7.58317			161	0.5	1.5	4.56125	1.52041	3.15917	1.26367	7.72042	160.5	4.5727	1.52423	3.01046	1.20419	7.58315	2.08315
162	6.86061e-15	1	4.11868	1.37289	3.3026	1.32104	7.42128	161.5	4.32769	1.44256	3.24787	1.29915	7.57556	2.07556		-0.299146	0		7.57556			162	6.86061e-15	1	4.11869	1.37289	3.30259	1.32104	7.42128	161.5	4.3277	1.44256	3.24786	1.29915	7.57556	2.07556
163	-0.5	0.5	3.37637	1.12546	3.23096	1.29238	6.60733	162.5	3.72694	1.24231	3.28488	1.31395	7.01182	1.51182		-0.813951	0		7.01181			163	-0.5	0.5	3.37638	1.12546	3.23095	1.29238	6.60733	162.5	3.72695	1.24231	3.28487	1.31395	7.01182	1.51182
164	-0.866025	0.133975	2.53321	0.844402	2.96346	1.18538	5.49667	163.5	2.93141	0.977136	3.11158	1.24463	6.04299	0.542991		-1.11066	-6.66134e-16		6.04297			164	-0.866025	0.133975	2.53321	0.844403	2.96346	1.18538	5.49667	163.5	2.93142	0.977137	3.11157	1.24463	6.04299	0.542991
165	-1	0	1.81512	0.60504	2.57178	1.02871	4.3869	164.5	2.15425	0.718085	2.77441	1.10977	4.92867	-0.571333		-1.10977	6.66134e-16		4.92865			165	-1	0	1.81513	0.605041	2.57178	1.02871	4.3869	164.5	2.15426	0.718085	2.77441	1.10977	4.92867	-0.571333
166	-0.866025	0.133975	1.41452	0.471508	2.16087	0.864347	3.57539	165.5	1.60372	0.534572	2.36372	0.945487	3.96743	-1.53257		-0.811512	-7.77156e-16		3.96743			166	-0.866025	0.133975	1.41453	0.471509	2.16086	0.864347	3.57539	165.5	1.60372	0.534573	2.36371	0.945487	3.96743	-1.53257
167	-0.5	0.5	1.43875	0.479585	1.84082	0.736329	3.27958	166.5	1.42731	0.47577	1.98954	0.795815	3.41685	-2.08315		-0.295815	5.55112e-16		3.41686			167	-0.5	0.5	1.43876	0.479585	1.84082	0.736329	3.27958	166.5	1.42732	0.475771	1.98953	0.795814	3.41685	-2.08315
168	-3.43042e-15	1	1.88132	0.627106	1.6974	0.678962	3.57872	167.5	1.67231	0.557436	1.75213	0.700854	3.42444	-2.07556		0.299146	0		3.42446			168	-3.43042e-15	1	1.88132	0.627106	1.6974	0.678962	3.57872	167.5	1.67231	0.557436	1.75213	0.700854	3.42444	-2.07556
169	0.5	1.5	2.62363	0.874544	1.76904	0.707616	4.39267	168.5	2.27306	0.757686	1.71512	0.686049	3.98818	-1.51182		0.813951	0		3.98821			169	0.5	1.5	2.62364	0.874544	1.76904	0.707616	4.39267	168.5	2.27306	0.757686	1.71512	0.686049	3.98818	-1.51182
170	0.866025	1.86603	3.46679	1.1556	2.03654	0.814615	5.50333	169.5	3.06859	1.02286	1.88842	0.755367	4.95701	-0.542991		1.11066	0		4.95705			170	0.866025	1.86603	3.4668	1.1556	2.03653	0.814615	5.50333	169.5	3.0686	1.02286	1.88841	0.755367	4.95701	-0.542991
171	1	2	4.18488	1.39496	2.42822	0.971287	6.6131	170.5	3.84575	1.28192	2.22559	0.890235	6.07133	0.571333		1.10977	0		6.07137			171	1	2	4.18488	1.39496	2.42821	0.971287	6.6131	170.5	3.84575	1.28191	2.22558	0.890235	6.07133	0.571333
172	0.866025	1.86603	4.58548	1.52849	2.83913	1.13565	7.42461	171.5	4.39628	1.46543	2.63628	1.05451	7.03257	1.53257		0.811512	0		7.0326			172	0.866025	1.86603	4.58548	1.52849	2.83913	1.13565	7.42461	171.5	4.39629	1.46543	2.63628	1.05451	7.03257	1.53257
173	0.5	1.5	4.56125	1.52042	3.15918	1.26367	7.72042	172.5	4.57269	1.52423	3.01046	1.20419	7.58315	2.08315		0.295815	0		7.58317			173	0.5	1.5	4.56125	1.52041	3.15917	1.26367	7.72042	172.5	4.5727	1.52423	3.01046	1.20419	7.58315	2.08315
174	1.42111e-14	1	4.11868	1.37289	3.3026	1.32104	7.42128	173.5	4.32769	1.44256	3.24787	1.29915	7.57556	2.07556		-0.299146	0		7.57556			174	1.42111e-14	1	4.11869	1.37289	3.30259	1.32104	7.42128	173.5	4.3277	1.44256	3.24786	1.29915	7.57556	2.07556
175	-0.5	0.5	3.37637	1.12546	3.23096	1.29238	6.60733	174.5	3.72694	1.24231	3.28488	1.31395	7.01182	1.51182		-0.813951	0		7.01181			175	-0.5	0.5	3.37638	1.12546	3.23095	1.29238	6.60733	174.5	3.72695	1.24231	3.28487	1.31395	7.01182	1.51182
176	-0.866025	0.133975	2.53321	0.844402	2.96346	1.18538	5.49667	175.5	2.93141	0.977136	3.11158	1.24463	6.04299	0.542991		-1.11066	0		6.04297			176	-0.866025	0.133975	2.53321	0.844403	2.96346	1.18538	5.49667	175.5	2.93142	0.977137	3.11157	1.24463	6.04299	0.542991
177	-1	0	1.81512	0.60504	2.57178	1.02871	4.3869	176.5	2.15425	0.718085	2.77441	1.10977	4.92867	-0.571333		-1.10977	2.22045e-16		4.92865			177	-1	0	1.81513	0.605041	2.57178	1.02871	4.3869	176.5	2.15426	0.718085	2.77441	1.10977	4.92867	-0.571333
178	-0.866025	0.133975	1.41452	0.471508	2.16087	0.864347	3.57539	177.5	1.60372	0.534572	2.36372	0.945487	3.96743	-1.53257		-0.811512	0		3.96743			178	-0.866025	0.133975	1.41453	0.471509	2.16086	0.864347	3.57539	177.5	1.60372	0.534573	2.36371	0.945487	3.96743	-1.53257
179	-0.5	0.5	1.43875	0.479585	1.84082	0.736329	3.27958	178.5	1.42731	0.47577	1.98954	0.795815	3.41685	-2.08315		-0.295815	0		3.41686			179	-0.5	0.5	1.43876	0.479585	1.84082	0.736329	3.27958	178.5	1.42732	0.475771	1.98953	0.795814	3.41685	-2.08315
180	-1.07809e-14	1	1.88132	0.627106	1.6974	0.678962	3.57872	179.5	1.67231	0.557436	1.75213	0.700854	3.42444	-2.07556		0.299146	0		3.42446			180	-1.07809e-14	1	1.88132	0.627106	1.6974	0.678962	3.57872	179.5	1.67231	0.557436	1.75213	0.700854	3.42444	-2.07556
181	0.5	1.5	2.62363	0.874544	1.76904	0.707616	4.39267	180.5	2.27306	0.757686	1.71512	0.686049	3.98818	-1.51182		0.813951	0		3.98821			181	0.5	1.5	2.62364	0.874544	1.76904	0.707616	4.39267	180.5	2.27306	0.757686	1.71512	0.686049	3.98818	-1.51182
182	0.866025	1.86603	3.46679	1.1556	2.03654	0.814615	5.50333	181.5	3.06859	1.02286	1.88842	0.755367	4.95701	-0.542991		1.11066	0		4.95705			182	0.866025	1.86603	3.4668	1.1556	2.03653	0.814615	5.50333	181.5	3.0686	1.02286	1.88841	0.755367	4.95701	-0.542991
183	1	2	4.18488	1.39496	2.42822	0.971287	6.6131	182.5	3.84575	1.28192	2.22559	0.890235	6.07133	0.571333		1.10977	0		6.07137			183	1	2	4.18488	1.39496	2.42821	0.971287	6.6131	182.5	3.84575	1.28191	2.22558	0.890235	6.07133	0.571333
184	0.866025	1.86603	4.58548	1.52849	2.83913	1.13565	7.42461	183.5	4.39628	1.46543	2.63628	1.05451	7.03257	1.53257		0.811512	0		7.0326			184	0.866025	1.86603	4.58548	1.52849	2.83913	1.13565	7.42461	183.5	4.39629	1.46543	2.63628	1.05451	7.03257	1.53257
185	0.5	1.5	4.56125	1.52042	3.15918	1.26367	7.72042	184.5	4.57269	1.52423	3.01046	1.20419	7.58315	2.08315		0.295815	0		7.58317			185	0.5	1.5	4.56125	1.52041	3.15917	1.26367	7.72042	184.5	4.5727	1.52423	3.01046	1.20419	7.58315	2.08315
186	7.35067e-15	1	4.11868	1.37289	3.3026	1.32104	7.42128	185.5	4.32769	1.44256	3.24787	1.29915	7.57556	2.07556		-0.299146	0		7.57556			186	7.35067e-15	1	4.11869	1.37289	3.30259	1.32104	7.42128	185.5	4.3277	1.44256	3.24786	1.29915	7.57556	2.07556
187	-0.5	0.5	3.37637	1.12546	3.23096	1.29238	6.60733	186.5	3.72694	1.24231	3.28488	1.31395	7.01182	1.51182		-0.813951	0		7.01181			187	-0.5	0.5	3.37638	1.12546	3.23095	1.29238	6.60733	186.5	3.72695	1.24231	3.28487	1.31395	7.01182	1.51182
188	-0.866025	0.133975	2.53321	0.844402	2.96346	1.18538	5.49667	187.5	2.93141	0.977136	3.11158	1.24463	6.04299	0.542991		-1.11066	0		6.04297			188	-0.866025	0.133975	2.53321	0.844403	2.96346	1.18538	5.49667	187.5	2.93142	0.977137	3.11157	1.24463	6.04299	0.542991
189	-1	0	1.81512	0.60504	2.57178	1.02871	4.3869	188.5	2.15425	0.718085	2.77441	1.10977	4.92867	-0.571333		-1.10977	-2.22045e-16		4.92865			189	-1	0	1.81513	0.605041	2.57178	1.02871	4.3869	188.5	2.15426	0.718085	2.77441	1.10977	4.92867	-0.571333
190	-0.866025	0.133975	1.41452	0.471508	2.16087	0.864347	3.57539	189.5	1.60372	0.534572	2.36372	0.945487	3.96743	-1.53257		-0.811512	4.44089e-16		3.96743			190	-0.866025	0.133975	1.41453	0.471509	2.16086	0.864347	3.57539	189.5	1.60372	0.534573	2.36371	0.945487	3.96743	-1.53257
191	-0.5	0.5	1.43875	0.479585	1.84082	0.736329	3.27958	190.5	1.42731	0.47577	1.98954	0.795815	3.41685	-2.08315		-0.295815	0		3.41686			191	-0.5	0.5	1.43876	0.479585	1.84082	0.736329	3.27958	190.5	1.42732	0.475771	1.98953	0.795814	3.41685	-2.08315
192	-3.92048e-15	1	1.88132	0.627106	1.6974	0.678962	3.57872	191.5	1.67231	0.557436	1.75213	0.700854	3.42444	-2.07556		0.299146	0		3.42446			192	-3.92048e-15	1	1.88132	0.627106	1.6974	0.678962	3.57872	191.5	1.67231	0.557436	1.75213	0.700854	3.42444	-2.07556
193	0.5	1.5	2.62363	0.874544	1.76904	0.707616	4.39267	192.5	2.27306	0.757686	1.71512	0.686049	3.98818	-1.51182		0.813951	0		3.98821			193	0.5	1.5	2.62364	0.874544	1.76904	0.707616	4.39267	192.5	2.27306	0.757686	1.71512	0.686049	3.98818	-1.51182
194	0.866025	1.86603	3.46679	1.1556	2.03654	0.814615	5.50333	193.5	3.06859	1.02286	1.88842	0.755367	4.95701	-0.542991		1.11066	0		4.95705			194	0.866025	1.86603	3.4668	1.1556	2.03653	0.814615	5.50333	193.5	3.0686	1.02286	1.88841	0.755367	4.95701	-0.542991
195	1	2	4.18488	1.39496	2.42822	0.971287	6.6131	194.5	3.84575	1.28192	2.22559	0.890235	6.07133	0.571333		1.10977	0		6.07137			195	1	2	4.18488	1.39496	2.42821	0.971287	6.6131	194.5	3.84575	1.28191	2.22558	0.890235	6.07133	0.571333
196	0.866025	1.86603	4.58548	1.52849	2.83913	1.13565	7.42461	195.5	4.39628	1.46543	2.63628	1.05451	7.03257	1.53257		0.811512	0		7.0326			196	0.866025	1.86603	4.58548	1.52849	2.83913	1.13565	7.42461	195.5	4.39629	1.46543	2.63628	1.05451	7.03257	1.53257
197	0.5	1.5	4.56125	1.52042	3.15918	1.26367	7.72042	196.5	4.57269	1.52423	3.01046	1.20419	7.58315	2.08315		0.295815	0		7.58317			197	0.5	1.5	4.56125	1.52041	3.15917	1.26367	7.72042	196.5	4.5727	1.52423	3.01046	1.20419	7.58315	2.08315
198	1.47011e-14	1	4.11868	1.37289	3.3026	1.32104	7.42128	197.5	4.32769	1.44256	3.24787	1.29915	7.57556	2.07556		-0.299146	0		7.57556			198	1.47011e-14	1	4.11869	1.37289	3.30259	1.32104	7.42128	197.5	4.3277	1.44256	3.24786	1.29915	7.57556	2.07556
199	-0.5	0.5	3.37637	1.12546	3.23096	1.29238	6.60733	198.5	3.72694	1.24231	3.28488	1.31395	7.01182	1.51182		-0.813951	8.88178e-16		7.01181			199	-0.5	0.5	3.37638	1.12546	3.23095	1.29238	6.60733	198.5	3.72695	1.24231	3.28487	1.31395	7.01182	1.51182
200	-0.866025	0.133975	2.53321	0.844402	2.96346	1.18538	5.49667	199.5	2.93141	0.977136	3.11158	1.24463	6.04299	0.542991		-1.11066	-3.33067e-16		6.04297			200	-0.866025	0.133975	2.53321	0.844403	2.96346	1.18538	5.49667	199.5	2.93142	0.977137	3.11157	1.24463	6.04299	0.542991
201	-1	0	1.81512	0.60504	2.57178	1.02871	4.3869	200.5	2.15425	0.718085	2.77441	1.10977	4.92867	-0.571333		-1.10977	-2.22045e-16		4.92865			201	-1	0	1.81513	0.605041	2.57178	1.02871	4.3869	200.5	2.15426	0.718085	2.77441	1.10977	4.92867	-0.571333
202	-0.866025	0.133975	1.41452	0.471508	2.16087	0.864347	3.57539	201.5	1.60372	0.534572	2.36372	0.945487	3.96743	-1.53257		-0.811512	3.33067e-16		3.96743			202	-0.866025	0.133975	1.41453	0.471509	2.16086	0.864347	3.57539	201.5	1.60372	0.534573	2.36371	0.945487	3.96743	-1.53257
203	-0.5	0.5	1.43875	0.479585	1.84082	0.736329	3.27958	202.5	1.42731	0.47577	1.98954	0.795815	3.41685	-2.08315		-0.295815	-4.44089e-16		3.41686			203	-0.5	0.5	1.43876	0.479585	1.84082	0.736329	3.27958	202.5	1.42732	0.475771	1.98953	0.795814	3.41685	-2.08315
204	-1.12709e-14	1	1.88132	0.627106	1.6974	0.678962	3.57872	203.5	1.67231	0.557436	1.75213	0.700854	3.42444	-2.07556		0.299146	0		3.42446			204	-1.12709e-14	1	1.88132	0.627106	1.6974	0.678962	3.57872	203.5	1.67231	0.557436	1.75213	0.700854	3.42444	-2.07556
205	0.5	1.5	2.62363	0.874544	1.76904	0.707616	4.39267	204.5	2.27306	0.757686	1.71512	0.686049	3.98818	-1.51182		0.813951	0		3.98821			205	0.5	1.5	2.62364	0.874544	1.76904	0.707616	4.39267	204.5	2.27306	0.757686	1.71512	0.686049	3.98818	-1.51182
206	0.866025	1.86603	3.46679	1.1556	2.03654	0.814615	5.50333	205.5	3.06859	1.02286	1.88842	0.755367	4.95701	-0.542991		1.11066	0		4.95705			206	0.866025	1.86603	3.4668	1.1556	2.03653	0.814615	5.50333	205.5	3.0686	1.02286	1.88841	0.755367	4.95701	-0.542991
207	1	2	4.18488	1.39496	2.42822	0.971287	6.6131	206.5	3.84575	1.28192	2.22559	0.890235	6.07133	0.571333		1.10977	0		6.07137			207	1	2	4.18488	1.39496	2.42821	0.971287	6.6131	206.5	3.84575	1.28191	2.22558	0.890235	6.07133	0.571333
208	0.866025	1.86603	4.58548	1.52849	2.83913	1.13565	7.42461	207.5	4.39628	1.46543	2.63628	1.05451	7.03257	1.53257		0.811512	0		7.0326			208	0.866025	1.86603	4.58548	1.52849	2.83913	1.13565	7.42461	207.5	4.39629	1.46543	2.63628	1.05451	7.03257	1.53257
209	0.5	1.5	4.56125	1.52042	3.15918	1.26367	7.72042	208.5	4.57269	1.52423	3.01046	1.20419	7.58315	2.08315		0.295815	0		7.58317			209	0.5	1.5	4.56125	1.52041	3.15917	1.26367	7.72042	208.5	4.5727	1.52423	3.01046	1.20419	7.58315	2.08315
210	7.84073e-15	1	4.11868	1.37289	3.3026	1.32104	7.42128	209.5	4.32769	1.44256	3.24787	1.29915	7.57556	2.07556		-0.299146	0		7.57556			210	7.84073e-15	1	4.11869	1.37289	3.30259	1.32104	7.42128	209.5	4.3277	1.44256	3.24786	1.29915	7.57556	2.07556
211	-0.5	0.5	3.37637	1.12546	3.23096	1.29238	6.60733	210.5	3.72694	1.24231	3.28488	1.31395	7.01182	1.51182		-0.813951	0		7.01181			211	-0.5	0.5	3.37638	1.12546	3.23095	1.29238	6.60733	210.5	3.72695	1.24231	3.28487	1.31395	7.01182	1.51182
212	-0.866025	0.133975	2.53321	0.844402	2.96346	1.18538	5.49667	211.5	2.93141	0.977136	3.11158	1.24463	6.04299	0.542991		-1.11066	0		6.04297			212	-0.866025	0.133975	2.53321	0.844403	2.96346	1.18538	5.49667	211.5	2.93142	0.977137	3.11157	1.24463	6.04299	0.542991
213	-1	0	1.81512	0.60504	2.57178	1.02871	4.3869	212.5	2.15425	0.718085	2.77441	1.10977	4.92867	-0.571333		-1.10977	-2.22045e-16		4.92865			213	-1	0	1.81513	0.605041	2.57178	1.02871	4.3869	212.5	2.15426	0.718085	2.77441	1.10977	4.92867	-0.571333
214	-0.866025	0.133975	1.41452	0.471508	2.16087	0.864347	3.57539	213.5	1.60372	0.534572	2.36372	0.945487	3.96743	-1.53257		-0.811512	2.22045e-16		3.96743			214	-0.866025	0.133975	1.41453	0.471509	2.16086	0.864347	3.57539	213.5	1.60372	0.534573	2.36371	0.945487	3.96743	-1.53257
215	-0.5	0.5	1.43875	0.479585	1.84082	0.736329	3.27958	214.5	1.42731	0.47577	1.98954	0.795815	3.41685	-2.08315		-0.295815	0		3.41686			215	-0.5	0.5	1.43876	0.479585	1.84082	0.736329	3.27958	214.5	1.42732	0.475771	1.98953	0.795814	3.41685	-2.08315
216	-1.86214e-14	1	1.88132	0.627106	1.6974	0.678962	3.57872	215.5	1.67231	0.557436	1.75213	0.700854	3.42444	-2.07556		0.299146	0		3.42446			216	-1.86214e-14	1	1.88132	0.627106	1.6974	0.678962	3.57872	215.5	1.67231	0.557436	1.75213	0.700854	3.42444	-2.07556
217	0.5	1.5	2.62363	0.874544	1.76904	0.707616	4.39267	216.5	2.27306	0.757686	1.71512	0.686049	3.98818	-1.51182		0.813951	0		3.98821			217	0.5	1.5	2.62364	0.874544	1.76904	0.707616	4.39267	216.5	2.27306	0.757686	1.71512	0.686049	3.98818	-1.51182
218	0.866025	1.86603	3.46679	1.1556	2.03654	0.814615	5.50333	217.5	3.06859	1.02286	1.88842	0.755367	4.95701	-0.542991		1.11066	0		4.95705			218	0.866025	1.86603	3.4668	1.1556	2.03653	0.814615	5.50333	217.5	3.0686	1.02286	1.88841	0.755367	4.95701	-0.542991
219	1	2	4.18488	1.39496	2.42822	0.971287	6.6131	218.5	3.84575	1.28192	2.22559	0.890235	6.07133	0.571333		1.10977	0		6.07137			219	1	2	4.18488	1.39496	2.42821	0.971287	6.6131	218.5	3.84575	1.28191	2.22558	0.890235	6.07133	0.571333
220	0.866025	1.86603	4.58548	1.52849	2.83913	1.13565	7.42461	219.5	4.39628	1.46543	2.63628	1.05451	7.03257	1.53257		0.811512	0		7.0326			220	0.866025	1.86603	4.58548	1.52849	2.83913	1.13565	7.42461	219.5	4.39629	1.46543	2.63628	1.05451	7.03257	1.53257
221	0.5	1.5	4.56125	1.52042	3.15918	1.26367	7.72042	220.5	4.57269	1.52423	3.01046	1.20419	7.58315	2.08315		0.295815	0		7.58317			221	0.5	1.5	4.56125	1.52041	3.15917	1.26367	7.72042	220.5	4.5727	1.52423	3.01046	1.20419	7.58315	2.08315
222	1.51912e-14	1	4.11868	1.37289	3.3026	1.32104	7.42128	221.5	4.32769	1.44256	3.24787	1.29915	7.57556	2.07556		-0.299146	0		7.57556			222	1.51912e-14	1	4.11869	1.37289	3.30259	1.32104	7.42128	221.5	4.3277	1.44256	3.24786	1.29915	7.57556	2.07556
223	-0.5	0.5	3.37637	1.12546	3.23096	1.29238	6.60733	222.5	3.72694	1.24231	3.28488	1.31395	7.01182	1.51182		-0.813951	0		7.01181			223	-0.5	0.5	3.37638	1.12546	3.23095	1.29238	6.60733	222.5	3.72695	1.24231	3.28487	1.31395	7.01182	1.51182
224	-0.866025	0.133975	2.53321	0.844402	2.96346	1.18538	5.49667	223.5	2.93141	0.977136	3.11158	1.24463	6.04299	0.542991		-1.11066	0		6.04297			224	-0.866025	0.133975	2.53321	0.844403	2.96346	1.18538	5.49667	223.5	2.93142	0.977137	3.11157	1.24463	6.04299	0.542991
225	-1	0	1.81512	0.60504	2.57178	1.02871	4.3869	224.5	2.15425	0.718085	2.77441	1.10977	4.92867	-0.571333		-1.10977	4.44089e-16		4.92865			225	-1	0	1.81513	0.605041	2.57178	1.02871	4.3869	224.5	2.15426	0.718085	2.77441	1.10977	4.92867	-0.571333
226	-0.866025	0.133975	1.41452	0.471508	2.16087	0.864347	3.57539	225.5	1.60372	0.534572	2.36372	0.945487	3.96743	-1.53257		-0.811512	-4.44089e-16		3.96743			226	-0.866025	0.133975	1.41453	0.471509	2.16086	0.864347	3.57539	225.5	1.60372	0.534573	2.36371	0.945487	3.96743	-1.53257
227	-0.5	0.5	1.43875	0.479585	1.84082	0.736329	3.27958	226.5	1.42731	0.47577	1.98954	0.795815	3.41685	-2.08315		-0.295815	0		3.41686			227	-0.5	0.5	1.43876	0.479585	1.84082	0.736329	3.27958	226.5	1.42732	0.475771	1.98953	0.795814	3.41685	-2.08315
228	-1.1761e-14	1	1.88132	0.627106	1.6974	0.678962	3.57872	227.5	1.67231	0.557436	1.75213	0.700854	3.42444	-2.07556		0.299146	0		3.42446			228	-1.1761e-14	1	1.88132	0.627106	1.6974	0.678962	3.57872	227.5	1.67231	0.557436	1.75213	0.700854	3.42444	-2.07556
229	0.5	1.5	2.62363	0.874544	1.76904	0.707616	4.39267	228.5	2.27306	0.757686	1.71512	0.686049	3.98818	-1.51182		0.813951	0		3.98821			229	0.5	1.5	2.62364	0.874544	1.76904	0.707616	4.39267	228.5	2.27306	0.757686	1.71512	0.686049	3.98818	-1.51182
230	0.866025	1.86603	3.46679	1.1556	2.03654	0.814615	5.50333	229.5	3.06859	1.02286	1.88842	0.755367	4.95701	-0.542991		1.11066	0		4.95705			230	0.866025	1.86603	3.4668	1.1556	2.03653	0.814615	5.50333	229.5	3.0686	1.02286	1.88841	0.755367	4.95701	-0.542991
231	1	2	4.18488	1.39496	2.42822	0.971287	6.6131	230.5	3.84575	1.28192	2.22559	0.890235	6.07133	0.571333		1.10977	0		6.07137			231	1	2	4.18488	1.39496	2.42821	0.971287	6.6131	230.5	3.84575	1.28191	2.22558	0.890235	6.07133	0.571333
232	0.866025	1.86603	4.58548	1.52849	2.83913	1.13565	7.42461	231.5	4.39628	1.46543	2.63628	1.05451	7.03257	1.53257		0.811512	0		7.0326			232	0.866025	1.86603	4.58548	1.52849	2.83913	1.13565	7.42461	231.5	4.39629	1.46543	2.63628	1.05451	7.03257	1.53257
233	0.5	1.5	4.56125	1.52042	3.15918	1.26367	7.72042	232.5	4.57269	1.52423	3.01046	1.20419	7.58315	2.08315		0.295815	0		7.58317			233	0.5	1.5	4.56125	1.52041	3.15917	1.26367	7.72042	232.5	4.5727	1.52423	3.01046	1.20419	7.58315	2.08315
234	8.33079e-15	1	4.11868	1.37289	3.3026	1.32104	7.42128	233.5	4.32769	1.44256	3.24787	1.29915	7.57556	2.07556		-0.299146	0		7.57556			234	8.33079e-15	1	4.11869	1.37289	3.30259	1.32104	7.42128	233.5	4.3277	1.44256	3.24786	1.29915	7.57556	2.07556
235	-0.5	0.5	3.37637	1.12546	3.23096	1.29238	6.60733	234.5	3.72694	1.24231	3.28488	1.31395	7.01182	1.51182		-0.813951	0		7.01181			235	-0.5	0.5	3.37638	1.12546	3.23095	1.29238	6.60733	234.5	3.72695	1.24231	3.28487	1.31395	7.01182	1.51182
236	-0.866025	0.133975	2.53321	0.844402	2.96346	1.18538	5.49667	235.5	2.93141	0.977136	3.11158	1.24463	6.04299	0.542991		-1.11066	0		6.04297			236	-0.866025	0.133975	2.53321	0.844403	2.96346	1.18538	5.49667	235.5	2.93142	0.977137	3.11157	1.24463	6.04299	0.542991
237	-1	0	1.81512	0.60504	2.57178	1.02871	4.3869	236.5	2.15425	0.718085	2.77441	1.10977	4.92867	-0.571333		-1.10977	4.44089e-16		4.92865			237	-1	0	1.81513	0.605041	2.57178	1.02871	4.3869	236.5	2.15426	0.718085	2.77441	1.10977	4.92867	-0.571333
238	-0.866025	0.133975	1.41452	0.471508	2.16087	0.864347	3.57539	237.5	1.60372	0.534572	2.36372	0.945487	3.96743	-1.53257		-0.811512	4.44089e-16		3.96743			238	-0.866025	0.133975	1.41453	0.471509	2.16086	0.864347	3.57539	237.5	1.60372	0.534573	2.36371	0.945487	3.96743	-1.53257
239	-0.5	0.5	1.43875	0.479585	1.84082	0.736329	3.27958	238.5	1.42731	0.47577	1.98954	0.795815	3.41685	-2.08315		-0.295815	0		3.41686			239	-0.5	0.5	1.43876	0.479585	1.84082	0.736329	3.27958	238.5	1.42732	0.475771	1.98953	0.795814	3.41685	-2.08315
240	-1.91114e-14	1	1.88132	0.627106	1.6974	0.678962	3.57872	239.5	1.67231	0.557436	1.75213	0.700854	3.42444	-2.07556		0.299146	0		3.42446			240	-1.91114e-14	1	1.88132	0.627106	1.6974	0.678962	3.57872	239.5	1.67231	0.557436	1.75213	0.700854	3.42444	-2.07556
241	0.5	1.5	2.62363	0.874544	1.76904	0.707616	4.39267	240.5	2.27306	0.757686	1.71512	0.686049	3.98818	-1.51182		0.813951	0		3.98821			241	0.5	1.5	2.62364	0.874544	1.76904	0.707616	4.39267	240.5	2.27306	0.757686	1.71512	0.686049	3.98818	-1.51182
242	0.866025	1.86603	3.46679	1.1556	2.03654	0.814615	5.50333	241.5	3.06859	1.02286	1.88842	0.755367	4.95701	-0.542991		1.11066	0		4.95705			242	0.866025	1.86603	3.4668	1.1556	2.03653	0.814615	5.50333	241.5	3.0686	1.02286	1.88841	0.755367	4.95701	-0.542991
243	1	2	4.18488	1.39496	2.42822	0.971287	6.6131	242.5	3.84575	1.28192	2.22559	0.890235	6.07133	0.571333		1.10977	0		6.07137			243	1	2	4.18488	1.39496	2.42821	0.971287	6.6131	242.5	3.84575	1.28191	2.22558	0.890235	6.07133	0.571333
244	0.866025	1.86603	4.58548	1.52849	2.83913	1.13565	7.42461	243.5	4.39628	1.46543	2.63628	1.05451	7.03257	1.53257		0.811512	0		7.0326			244	0.866025	1.86603	4.58548	1.52849	2.83913	1.13565	7.42461	243.5	4.39629	1.46543	2.63628	1.05451	7.03257	1.53257
245	0.5	1.5	4.56125	1.52042	3.15918	1.26367	7.72042	244.5	4.57269	1.52423	3.01046	1.20419	7.58315	2.08315		0.295815	0		7.58317			245	0.5	1.5	4.56125	1.52041	3.15917	1.26367	7.72042	244.5	4.5727	1.52423	3.01046	1.20419	7.58315	2.08315
246	1.56812e-14	1	4.11868	1.37289	3.3026	1.32104	7.42128	245.5	4.32769	1.44256	3.24787	1.29915	7.57556	2.07556		-0.299146	0		7.57556			246	1.56812e-14	1	4.11869	1.37289	3.30259	1.32104	7.42128	245.5	4.3277	1.44256	3.24786	1.29915	7.57556	2.07556
247	-0.5	0.5	3.37637	1.12546	3.23096	1.29238	6.60733	246.5	3.72694	1.24231	3.28488	1.31395	7.01182	1.51182		-0.813951	0		7.01181			247	-0.5	0.5	3.37638	1.12546	3.23095	1.29238	6.60733	246.5	3.72695	1.24231	3.28487	1.31395	7.01182	1.51182
248	-0.866025	0.133975	2.53321	0.844402	2.96346	1.18538	5.49667	247.5	2.93141	0.977136	3.11158	1.24463	6.04299	0.542991		-1.11066	-6.66134e-16		6.04297			248	-0.866025	0.133975	2.53321	0.844403	2.96346	1.18538	5.49667	247.5	2.93142	0.977137	3.11157	1.24463	6.04299	0.542991
249	-1	0	1.81512	0.60504	2.57178	1.02871	4.3869	248.5	2.15425	0.718085	2.77441	1.10977	4.92867	-0.571333		-1.10977	6.66134e-16		4.92865			249	-1	0	1.81513	0.605041	2.57178	1.02871	4.3869	248.5	2.15426	0.718085	2.77441	1.10977	4.92867	-0.571333
250	-0.866025	0.133975	1.41452	0.471508	2.16087	0.864347	3.57539	249.5	1.60372	0.534572	2.36372	0.945487	3.96743	-1.53257		-0.811512	0		3.96743			250	-0.866025	0.133975	1.41453	0.471509	2.16086	0.864347	3.57539	249.5	1.60372	0.534573	2.36371	0.945487	3.96743	-1.53257
251	-0.5	0.5	1.43875	0.479585	1.84082	0.736329	3.27958	250.5	1.42731	0.47577	1.98954	0.795815	3.41685	-2.08315		-0.295815	0		3.41686			251	-0.5	0.5	1.43876	0.479585	1.84082	0.736329	3.27958	250.5	1.42732	0.475771	1.98953	0.795814	3.41685	-2.08315
252	-2.64619e-14	1	1.88132	0.627106	1.6974	0.678962	3.57872	251.5	1.67231	0.557436	1.75213	0.700854	3.42444	-2.07556		0.299146	0		3.42446			252	-2.64619e-14	1	1.88132	0.627106	1.6974	0.678962	3.57872	251.5	1.67231	0.557436	1.75213	0.700854	3.42444	-2.07556
253	0.5	1.5	2.62363	0.874544	1.76904	0.707616	4.39267	252.5	2.27306	0.757686	1.71512	0.686049	3.98818	-1.51182		0.813951	0		3.98821			253	0.5	1.5	2.62364	0.874544	1.76904	0.707616	4.39267	252.5	2.27306	0.757686	1.71512	0.686049	3.98818	-1.51182
254	0.866025	1.86603	3.46679	1.1556	2.03654	0.814615	5.50333	253.5	3.06859	1.02286	1.88842	0.755367	4.95701	-0.542991		1.11066	0		4.95705			254	0.866025	1.86603	3.4668	1.1556	2.03653	0.814615	5.50333	253.5	3.0686	1.02286	1.88841	0.755367	4.95701	-0.542991
255	1	2	4.18488	1.39496	2.42822	0.971287	6.6131	254.5	3.84575	1.28192	2.22559	0.890235	6.07133	0.571333		1.10977	0		6.07137			255	1	2	4.18488	1.39496	2.42821	0.971287	6.6131	254.5	3.84575	1.28191	2.22558	0.890235	6.07133	0.571333
256	0.866025	1.86603	4.58548	1.52849	2.83913	1.13565	7.42461	255.5	4.39628	1.46543	2.63628	1.05451	7.03257	1.53257		0.811512	0		7.0326			256	0.866025	1.86603	4.58548	1.52849	2.83913	1.13565	7.42461	255.5	4.39629	1.46543	2.63628	1.05451	7.03257	1.53257
257	0.5	1.5	4.56125	1.52042	3.15918	1.26367	7.72042	256.5	4.57269	1.52423	3.01046	1.20419	7.58315	2.08315		0.295815	0		7.58317			257	0.5	1.5	4.56125	1.52041	3.15917	1.26367	7.72042	256.5	4.5727	1.52423	3.01046	1.20419	7.58315	2.08315
258	8.82085e-15	1	4.11868	1.37289	3.3026	1.32104	7.42128	257.5	4.32769	1.44256	3.24787	1.29915	7.57556	2.07556		-0.299146	0		7.57556			258	8.82085e-15	1	4.11869	1.37289	3.30259	1.32104	7.42128	257.5	4.3277	1.44256	3.24786	1.29915	7.57556	2.07556
259	-0.5	0.5	3.37637	1.12546	3.23096	1.29238	6.60733	258.5	3.72694	1.24231	3.28488	1.31395	7.01182	1.51182		-0.813951	0		7.01181			259	-0.5	0.5	3.37638	1.12546	3.23095	1.29238	6.60733	258.5	3.72695	1.24231	3.28487	1.31395	7.01182	1.51182
260	-0.866025	0.133975	2.53321	0.844402	2.96346	1.18538	5.49667	259.5	2.93141	0.977136	3.11158	1.24463	6.04299	0.542991		-1.11066	-7.77156e-16		6.04297			260	-0.866025	0.133975	2.53321	0.844403	2.96346	1.18538	5.49667	259.5	2.93142	0.977137	3.11157	1.24463	6.04299	0.542991
261	-1	0	1.81512	0.60504	2.57178	1.02871	4.3869	260.5	2.15425	0.718085	2.77441	1.10977	4.92867	-0.571333		-1.10977	2.22045e-16		4.92865			261	-1	0	1.81513	0.605041	2.57178	1.02871	4.3869	260.5	2.15426	0.718085	2.77441	1.10977	4.92867	-0.571333
262	-0.866025	0.133975	1.41452	0.471508	2.16087	0.864347	3.57539	261.5	1.60372	0.534572	2.36372	0.945487	3.96743	-1.53257		-0.811512	2.22045e-16		3.96743			262	-0.866025	0.133975	1.41453	0.471509	2.16086	0.864347	3.57539	261.5	1.60372	0.534573	2.36371	0.945487	3.96743	-1.53257
263	-0.5	0.5	1.43875	0.479585	1.84082	0.736329	3.27958	262.5	1.42731	0.47577	1.98954	0.795815	3.41685	-2.08315		-0.295815	0		3.41686			263	-0.5	0.5	1.43876	0.479585	1.84082	0.736329	3.27958	262.5	1.42732	0.475771	1.98953	0.795814	3.41685	-2.08315
264	-1.96015e-14	1	1.88132	0.627106	1.6974	0.678962	3.57872	263.5	1.67231	0.557436	1.75213	0.700854	3.42444	-2.07556		0.299146	0		3.42446			264	-1.96015e-14	1	1.88132	0.627106	1.6974	0.678962	3.57872	263.5	1.67231	0.557436	1.75213	0.700854	3.42444	-2.07556
265	0.5	1.5	2.62363	0.874544	1.76904	0.707616	4.39267	264.5	2.27306	0.757686	1.71512	0.686049	3.98818	-1.51182		0.813951	0		3.98821			265	0.5	1.5	2.62364	0.874544	1.76904	0.707616	4.39267	264.5	2.27306	0.757686	1.71512	0.686049	3.98818	-1.51182
266	0.866025	1.86603	3.46679	1.1556	2.03654	0.814615	5.50333	265.5	3.06859	1.02286	1.88842	0.755367	4.95701	-0.542991		1.11066	0		4.95705			266	0.866025	1.86603	3.4668	1.1556	2.03653	0.814615	5.50333	265.5	3.0686	1.02286	1.88841	0.755367	4.95701	-0.542991
267	1	2	4.18488	1.39496	2.42822	0.971287	6.6131	266.5	3.84575	1.28192	2.22559	0.890235	6.07133	0.571333		1.10977	0		6.07137			267	1	2	4.18488	1.39496	2.42821	0.971287	6.6131	266.5	3.84575	1.28191	2.22558	0.890235	6.07133	0.571333
268	0.866025	1.86603	4.58548	1.52849	2.83913	1.13565	7.42461	267.5	4.39628	1.46543	2.63628	1.05451	7.03257	1.53257		0.811512	0		7.0326			268	0.866025	1.86603	4.58548	1.52849	2.83913	1.13565	7.42461	267.5	4.39629	1.46543	2.63628	1.05451	7.03257	1.53257
269	0.5	1.5	4.56125	1.52042	3.15918	1.26367	7.72042	268.5	4.57269	1.52423	3.01046	1.20419	7.58315	2.08315		0.295815	0		7.58317			269	0.5	1.5	4.56125	1.52041	3.15917	1.26367	7.72042	268.5	4.5727	1.52423	3.01046	1.20419	7.58315	2.08315
270	1.96045e-15	1	4.11868	1.37289	3.3026	1.32104	7.42128	269.5	4.32769	1.44256	3.24787	1.29915	7.57556	2.07556		-0.299146	0		7.57556			270	1.96045e-15	1	4.11869	1.37289	3.30259	1.32104	7.42128	269.5	4.3277	1.44256	3.24786	1.29915	7.57556	2.07556
271	-0.5	0.5	3.37637	1.12546	3.23096	1.29238	6.60733	270.5	3.72694	1.24231	3.28488	1.31395	7.01182	1.51182		-0.813951	0		7.01181			271	-0.5	0.5	3.37638	1.12546	3.23095	1.29238	6.60733	270.5	3.72695	1.24231	3.28487	1.31395	7.01182	1.51182
272	-0.866025	0.133975	2.53321	0.844402	2.96346	1.18538	5.49667	271.5	2.93141	0.977136	3.11158	1.24463	6.04299	0.542991		-1.11066	2.22045e-16		6.04297			272	-0.866025	0.133975	2.53321	0.844403	2.96346	1.18538	5.49667	271.5	2.93142	0.977137	3.11157	1.24463	6.04299	0.542991
273	-1	0	1.81512	0.60504	2.57178	1.02871	4.3869	272.5	2.15425	0.718085	2.77441	1.10977	4.92867	-0.571333		-1.10977	2.22045e-16		4.92865			273	-1	0	1.81513	0.605041	2.57178	1.02871	4.3869	272.5	2.15426	0.718085	2.77441	1.10977	4.92867	-0.571333
274	-0.866025	0.133975	1.41452	0.471508	2.16087	0.864347	3.57539	273.5	1.60372	0.534572	2.36372	0.945487	3.96743	-1.53257		-0.811512	-2.22045e-16		3.96743			274	-0.866025	0.133975	1.41453	0.471509	2.16086	0.864347	3.57539	273.5	1.60372	0.534573	2.36371	0.945487	3.96743	-1.53257
275	-0.5	0.5	1.43875	0.479585	1.84082	0.736329	3.27958	274.5	1.42731	0.47577	1.98954	0.795815	3.41685	-2.08315		-0.295815	0		3.41686			275	-0.5	0.5	1.43876	0.479585	1.84082	0.736329	3.27958	274.5	1.42732	0.475771	1.98953	0.795814	3.41685	-2.08315
276	-1.27411e-14	1	1.88132	0.627106	1.6974	0.678962	3.57872	275.5	1.67231	0.557436	1.75213	0.700854	3.42444	-2.07556		0.299146	0		3.42446			276	-1.27411e-14	1	1.88132	0.627106	1.6974	0.678962	3.57872	275.5	1.67231	0.557436	1.75213	0.700854	3.42444	-2.07556
277	0.5	1.5	2.62363	0.874544	1.76904	0.707616	4.39267	276.5	2.27306	0.757686	1.71512	0.686049	3.98818	-1.51182		0.813951	0		3.98821			277	0.5	1.5	2.62364	0.874544	1.76904	0.707616	4.39267	276.5	2.27306	0.757686	1.71512	0.686049	3.98818	-1.51182
278	0.866025	1.86603	3.46679	1.1556	2.03654	0.814615	5.50333	277.5	3.06859	1.02286	1.88842	0.755367	4.95701	-0.542991		1.11066	0		4.95705			278	0.866025	1.86603	3.4668	1.1556	2.03653	0.814615	5.50333	277.5	3.0686	1.02286	1.88841	0.755367	4.95701	-0.542991
279	1	2	4.18488	1.39496	2.42822	0.971287	6.6131	278.5	3.84575	1.28192	2.22559	0.890235	6.07133	0.571333		1.10977	0		6.07137			279	1	2	4.18488	1.39496	2.42821	0.971287	6.6131	278.5	3.84575	1.28191	2.22558	0.890235	6.07133	0.571333
280	0.866025	1.86603	4.58548	1.52849	2.83913	1.13565	7.42461	279.5	4.39628	1.46543	2.63628	1.05451	7.03257	1.53257		0.811512	0		7.0326			280	0.866025	1.86603	4.58548	1.52849	2.83913	1.13565	7.42461	279.5	4.39629	1.46543	2.63628	1.05451	7.03257	1.53257
281	0.5	1.5	4.56125	1.52042	3.15918	1.26367	7.72042	280.5	4.57269	1.52423	3.01046	1.20419	7.58315	2.08315		0.295815	0		7.58317			281	0.5	1.5	4.56125	1.52041	3.15917	1.26367	7.72042	280.5	4.5727	1.52423	3.01046	1.20419	7.58315	2.08315
282	2.35218e-14	1	4.11868	1.37289	3.3026	1.32104	7.42128	281.5	4.32769	1.44256	3.24787	1.29915	7.57556	2.07556		-0.299146	0		7.57556			282	2.35218e-14	1	4.11869	1.37289	3.30259	1.32104	7.42128	281.5	4.3277	1.44256	3.24786	1.29915	7.57556	2.07556
283	-0.5	0.5	3.37637	1.12546	3.23096	1.29238	6.60733	282.5	3.72694	1.24231	3.28488	1.31395	7.01182	1.51182		-0.813951	0		7.01181			283	-0.5	0.5	3.37638	1.12546	3.23095	1.29238	6.60733	282.5	3.72695	1.24231	3.28487	1.31395	7.01182	1.51182
284	-0.866025	0.133975	2.53321	0.844402	2.96346	1.18538	5.49667	283.5	2.93141	0.977136	3.11158	1.24463	6.04299	0.542991		-1.11066	0		6.04297			284	-0.866025	0.133975	2.53321	0.844403	2.96346	1.18538	5.49667	283.5	2.93142	0.977137	3.11157	1.24463	6.04299	0.542991
285	-1	0	1.81512	0.60504	2.57178	1.02871	4.3869	284.5	2.15425	0.718085	2.77441	1.10977	4.92867	-0.571333		-1.10977	-4.44089e-16		4.92865			285	-1	0	1.81513	0.605041	2.57178	1.02871	4.3869	284.5	2.15426	0.718085	2.77441	1.10977	4.92867	-0.571333
286	-0.866025	0.133975	1.41452	0.471508	2.16087	0.864347	3.57539	285.5	1.60372	0.534572	2.36372	0.945487	3.96743	-1.53257		-0.811512	0		3.96743			286	-0.866025	0.133975	1.41453	0.471509	2.16086	0.864347	3.57539	285.5	1.60372	0.534573	2.36371	0.945487	3.96743	-1.53257
287	-0.5	0.5	1.43875	0.479585	1.84082	0.736329	3.27958	286.5	1.42731	0.47577	1.98954	0.795815	3.41685	-2.08315		-0.295815	0		3.41686			287	-0.5	0.5	1.43876	0.479585	1.84082	0.736329	3.27958	286.5	1.42732	0.475771	1.98953	0.795814	3.41685	-2.08315
288	-5.88071e-15	1	1.88132	0.627106	1.6974	0.678962	3.57872	287.5	1.67231	0.557436	1.75213	0.700854	3.42444	-2.07556		0.299146	0		3.42446			288	-5.88071e-15	1	1.88132	0.627106	1.6974	0.678962	3.57872	287.5	1.67231	0.557436	1.75213	0.700854	3.42444	-2.07556
289	0.5	1.5	2.62363	0.874544	1.76904	0.707616	4.39267	288.5	2.27306	0.757686	1.71512	0.686049	3.98818	-1.51182		0.813951	0		3.98821			289	0.5	1.5	2.62364	0.874544	1.76904	0.707616	4.39267	288.5	2.27306	0.757686	1.71512	0.686049	3.98818	-1.51182
290	0.866025	1.86603	3.46679	1.1556	2.03654	0.814615	5.50333	289.5	3.06859	1.02286	1.88842	0.755367	4.95701	-0.542991		1.11066	0		4.95705			290	0.866025	1.86603	3.4668	1.1556	2.03653	0.814615	5.50333	289.5	3.0686	1.02286	1.88841	0.755367	4.95701	-0.542991
291	1	2	4.18488	1.39496	2.42822	0.971287	6.6131	290.5	3.84575	1.28192	2.22559	0.890235	6.07133	0.571333		1.10977	0		6.07137			291	1	2	4.18488	1.39496	2.42821	0.971287	6.6131	290.5	3.84575	1.28191	2.22558	0.890235	6.07133	0.571333
292	0.866025	1.86603	4.58548	1.52849	2.83913	1.13565	7.42461	291.5	4.39628	1.46543	2.63628	1.05451	7.03257	1.53257		0.811512	0		7.0326			292	0.866025	1.86603	4.58548	1.52849	2.83913	1.13565	7.42461	291.5	4.39629	1.46543	2.63628	1.05451	7.03257	1.53257
293	0.5	1.5	4.56125	1.52042	3.15918	1.26367	7.72042	292.5	4.57269	1.52423	3.01046	1.20419	7.58315	2.08315		0.295815	0		7.58317			293	0.5	1.5	4.56125	1.52041	3.15917	1.26367	7.72042	292.5	4.5727	1.52423	3.01046	1.20419	7.58315	2.08315
294	1.66614e-14	1	4.11868	1.37289	3.3026	1.32104	7.42128	293.5	4.32769	1.44256	3.24787	1.29915	7.57556	2.07556		-0.299146	0		7.57556			294	1.66614e-14	1	4.11869	1.37289	3.30259	1.32104	7.42128	293.5	4.3277	1.44256	3.24786	1.29915	7.57556	2.07556
295	-0.5	0.5	3.37637	1.12546	3.23096	1.29238	6.60733	294.5	3.72694	1.24231	3.28488	1.31395	7.01182	1.51182		-0.813951	0		7.01181			295	-0.5	0.5	3.37638	1.12546	3.23095	1.29238	6.60733	294.5	3.72695	1.24231	3.28487	1.31395	7.01182	1.51182
296	-0.866025	0.133975	2.53321	0.844402	2.96346	1.18538	5.49667	295.5	2.93141	0.977136	3.11158	1.24463	6.04299	0.542991		-1.11066	-4.44089e-16		6.04297			296	-0.866025	0.133975	2.53321	0.844403	2.96346	1.18538	5.49667	295.5	2.93142	0.977137	3.11157	1.24463	6.04299	0.542991
297	-1	0	1.81512	0.60504	2.57178	1.02871	4.3869	296.5	2.15425	0.718085	2.77441	1.10977	4.92867	-0.571333		-1.10977	-4.44089e-16		4.92865			297	-1	0	1.81513	0.605041	2.57178	1.02871	4.3869	296.5	2.15426	0.718085	2.77441	1.10977	4.92867	-0.571333
298	-0.866025	0.133975	1.41452	0.471508	2.16087	0.864347	3.57539	297.5	1.60372	0.534572	2.36372	0.945487	3.96743	-1.53257		-0.811512	4.44089e-16		3.96743			298	-0.866025	0.133975	1.41453	0.471509	2.16086	0.864347	3.57539	297.5	1.60372	0.534573	2.36371	0.945487	3.96743	-1.53257
299	-0.5	0.5	1.43875	0.479585	1.84082	0.736329	3.27958	298.5	1.42731	0.47577	1.98954	0.795815	3.41685	-2.08315		-0.295815	0		3.41686			299	-0.5	0.5	1.43876	0.479585	1.84082	0.736329	3.27958	298.5	1.42732	0.475771	1.98953	0.795814	3.41685	-2.08315
300	-2.7442e-14	1	1.88132	0.627106	1.6974	0.678962	3.57872	299.5	1.67231	0.557436	1.75213	0.700854	3.42444	-2.07556		0.299146	0		3.42446			300	-2.7442e-14	1	1.88132	0.627106	1.6974	0.678962	3.57872	299.5	1.67231	0.557436	1.75213	0.700854	3.42444	-2.07556
301	0.5	1.5	2.62363	0.874544	1.76904	0.707616	4.39267	300.5	2.27306	0.757686	1.71512	0.686049	3.98818	-1.51182		0.813951	0		3.98821			301	0.5	1.5	2.62364	0.874544	1.76904	0.707616	4.39267	300.5	2.27306	0.757686	1.71512	0.686049	3.98818	-1.51182
302	0.866025	1.86603	3.46679	1.1556	2.03654	0.814615	5.50333	301.5	3.06859	1.02286	1.88842	0.755367	4.95701	-0.542991		1.11066	0		4.95705			302	0.866025	1.86603	3.4668	1.1556	2.03653	0.814615	5.50333	301.5	3.0686	1.02286	1.88841	0.755367	4.95701	-0.542991
303	1	2	4.18488	1.39496	2.42822	0.971287	6.6131	302.5	3.84575	1.28192	2.22559	0.890235	6.07133	0.571333		1.10977	0		6.07137			303	1	2	4.18488	1.39496	2.42821	0.971287	6.6131	302.5	3.84575	1.28191	2.22558	0.890235	6.07133	0.571333
304	0.866025	1.86603	4.58548	1.52849	2.83913	1.13565	7.42461	303.5	4.39628	1.46543	2.63628	1.05451	7.03257	1.53257		0.811512	0		7.0326			304	0.866025	1.86603	4.58548	1.52849	2.83913	1.13565	7.42461	303.5	4.39629	1.46543	2.63628	1.05451	7.03257	1.53257
305	0.5	1.5	4.56125	1.52042	3.15918	1.26367	7.72042	304.5	4.57269	1.52423	3.01046	1.20419	7.58315	2.08315		0.295815	0		7.58317			305	0.5	1.5	4.56125	1.52041	3.15917	1.26367	7.72042	304.5	4.5727	1.52423	3.01046	1.20419	7.58315	2.08315
306	9.80097e-15	1	4.11868	1.37289	3.3026	1.32104	7.42128	305.5	4.32769	1.44256	3.24787	1.29915	7.57556	2.07556		-0.299146	0		7.57556			306	9.80097e-15	1	4.11869	1.37289	3.30259	1.32104	7.42128	305.5	4.3277	1.44256	3.24786	1.29915	7.57556	2.07556
307	-0.5	0.5	3.37637	1.12546	3.23096	1.29238	6.60733	306.5	3.72694	1.24231	3.28488	1.31395	7.01182	1.51182		-0.813951	0		7.01181			307	-0.5	0.5	3.37638	1.12546	3.23095	1.29238	6.60733	306.5	3.72695	1.24231	3.28487	1.31395	7.01182	1.51182
308	-0.866025	0.133975	2.53321	0.844402	2.96346	1.18538	5.49667	307.5	2.93141	0.977136	3.11158	1.24463	6.04299	0.542991		-1.11066	-3.33067e-16		6.04297			308	-0.866025	0.133975	2.53321	0.844403	2.96346	1.18538	5.49667	307.5	2.93142	0.977137	3.11157	1.24463	6.04299	0.542991
309	-1	0	1.81512	0.60504	2.57178	1.02871	4.3869	308.5	2.15425	0.718085	2.77441	1.10977	4.92867	-0.571333		-1.10977	4.44089e-16		4.92865			309	-1	0	1.81513	0.605041	2.57178	1.02871	4.3869	308.5	2.15426	0.718085	2.77441	1.10977	4.92867	-0.571333
310	-0.866025	0.133975	1.41452	0.471508	2.16087	0.864347	3.57539	309.5	1.60372	0.534572	2.36372	0.945487	3.96743	-1.53257		-0.811512	0		3.96743			310	-0.866025	0.133975	1.41453	0.471509	2.16086	0.864347	3.57539	309.5	1.60372	0.534573	2.36371	0.945487	3.96743	-1.53257
311	-0.5	0.5	1.43875	0.479585	1.84082	0.736329	3.27958	310.5	1.42731	0.47577	1.98954	0.795815	3.41685	-2.08315		-0.295815	0		3.41686			311	-0.5	0.5	1.43876	0.479585	1.84082	0.736329	3.27958	310.5	1.42732	0.475771	1.98953	0.795814	3.41685	-2.08315
312	-2.05816e-14	1	1.88132	0.627106	1.6974	0.678962	3.57872	311.5	1.67231	0.557436	1.75213	0.700854	3.42444	-2.07556		0.299146	0		3.42446			312	-2.05816e-14	1	1.88132	0.627106	1.6974	0.678962	3.57872	311.5	1.67231	0.557436	1.75213	0.700854	3.42444	-2.07556
313	0.5	1.5	2.62363	0.874544	1.76904	0.707616	4.39267	312.5	2.27306	0.757686	1.71512	0.686049	3.98818	-1.51182		0.813951	0		3.98821			313	0.5	1.5	2.62364	0.874544	1.76904	0.707616	4.39267	312.5	2.27306	0.757686	1.71512	0.686049	3.98818	-1.51182
314	0.866025	1.86603	3.46679	1.1556	2.03654	0.814615	5.50333	313.5	3.06859	1.02286	1.88842	0.755367	4.95701	-0.542991		1.11066	0		4.95705			314	0.866025	1.86603	3.4668	1.1556	2.03653	0.814615	5.50333	313.5	3.0686	1.02286	1.88841	0.755367	4.95701	-0.542991
315	1	2	4.18488	1.39496	2.42822	0.971287	6.6131	314.5	3.84575	1.28192	2.22559	0.890235	6.07133	0.571333		1.10977	0		6.07137			315	1	2	4.18488	1.39496	2.42821	0.971287	6.6131	314.5	3.84575	1.28191	2.22558	0.890235	6.07133	0.571333
316	0.866025	1.86603	4.58548	1.52849	2.83913	1.13565	7.42461	315.5	4.39628	1.46543	2.63628	1.05451	7.03257	1.53257		0.811512	0		7.0326			316	0.866025	1.86603	4.58548	1.52849	2.83913	1.13565	7.42461	315.5	4.39629	1.46543	2.63628	1.05451	7.03257	1.53257
317	0.5	1.5	4.56125	1.52042	3.15918	1.26367	7.72042	316.5	4.57269	1.52423	3.01046	1.20419	7.58315	2.08315		0.295815	0		7.58317			317	0.5	1.5	4.56125	1.52041	3.15917	1.26367	7.72042	316.5	4.5727	1.52423	3.01046	1.20419	7.58315	2.08315
318	3.13623e-14	1	4.11868	1.37289	3.3026	1.32104	7.42128	317.5	4.32769	1.44256	3.24787	1.29915	7.57556	2.07556		-0.299146	0		7.57556			318	3.13623e-14	1	4.11869	1.37289	3.30259	1.32104	7.42128	317.5	4.3277	1.44256	3.24786	1.29915	7.57556	2.07556
319	-0.5	0.5	3.37637	1.12546	3.23096	1.29238	6.60733	318.5	3.72694	1.24231	3.28488	1.31395	7.01182	1.51182		-0.813951	0		7.01181			319	-0.5	0.5	3.37638	1.12546	3.23095	1.29238	6.60733	318.5	3.72695	1.24231	3.28487	1.31395	7.01182	1.51182
320	-0.866025	0.133975	2.53321	0.844402	2.96346	1.18538	5.49667	319.5	2.93141	0.977136	3.11158	1.24463	6.04299	0.542991		-1.11066	-4.44089e-16		6.04297			320	-0.866025	0.133975	2.53321	0.844403	2.96346	1.18538	5.49667	319.5	2.93142	0.977137	3.11157	1.24463	6.04299	0.542991
321	-1	0	1.81512	0.60504	2.57178	1.02871	4.3869	320.5	2.15425	0.718085	2.77441	1.10977	4.92867	-0.571333		-1.10977	0		4.92865			321	-1	0	1.81513	0.605041	2.57178	1.02871	4.3869	320.5	2.15426	0.718085	2.77441	1.10977	4.92867	-0.571333
322	-0.866025	0.133975	1.41452	0.471508	2.16087	0.864347	3.57539	321.5	1.60372	0.534572	2.36372	0.945487	3.96743	-1.53257		-0.811512	-3.33067e-16		3.96743			322	-0.866025	0.133975	1.41453	0.471509	2.16086	0.864347	3.57539	321.5	1.60372	0.534573	2.36371	0.945487	3.96743	-1.53257
323	-0.5	0.5	1.43875	0.479585	1.84082	0.736329	3.27958	322.5	1.42731	0.47577	1.98954	0.795815	3.41685	-2.08315		-0.295815	0		3.41686			323	-0.5	0.5	1.43876	0.479585	1.84082	0.736329	3.27958	322.5	1.42732	0.475771	1.98953	0.795814	3.41685	-2.08315
324	-1.37212e-14	1	1.88132	0.627106	1.6974	0.678962	3.57872	323.5	1.67231	0.557436	1.75213	0.700854	3.42444	-2.07556		0.299146	0		3.42446			324	-1.37212e-14	1	1.88132	0.627106	1.6974	0.678962	3.57872	323.5	1.67231	0.557436	1.75213	0.700854	3.42444	-2.07556
325	0.5	1.5	2.62363	0.874544	1.76904	0.707616	4.39267	324.5	2.27306	0.757686	1.71512	0.686049	3.98818	-1.51182		0.813951	0		3.98821			325	0.5	1.5	2.62364	0.874544	1.76904	0.707616	4.39267	324.5	2.27306	0.757686	1.71512	0.686049	3.98818	-1.51182
326	0.866025	1.86603	3.46679	1.1556	2.03654	0.814615	5.50333	325.5	3.06859	1.02286	1.88842	0.755367	4.95701	-0.542991		1.11066	0		4.95705			326	0.866025	1.86603	3.4668	1.1556	2.03653	0.814615	5.50333	325.5	3.0686	1.02286	1.88841	0.755367	4.95701	-0.542991
327	1	2	4.18488	1.39496	2.42822	0.971287	6.6131	326.5	3.84575	1.28192	2.22559	0.890235	6.07133	0.571333		1.10977	0		6.07137			327	1	2	4.18488	1.39496	2.42821	0.971287	6.6131	326.5	3.84575	1.28191	2.22558	0.890235	6.07133	0.571333
328	0.866025	1.86603	4.58548	1.52849	2.83913	1.13565	7.42461	327.5	4.39628	1.46543	2.63628	1.05451	7.03257	1.53257		0.811512	0		7.0326			328	0.866025	1.86603	4.58548	1.52849	2.83913	1.13565	7.42461	327.5	4.39629	1.46543	2.63628	1.05451	7.03257	1.53257
329	0.5	1.5	4.56125	1.52042	3.15918	1.26367	7.72042	328.5	4.57269	1.52423	3.01046	1.20419	7.58315	2.08315		0.295815	0		7.58317			329	0.5	1.5	4.56125	1.52041	3.15917	1.26367	7.72042	328.5	4.5727	1.52423	3.01046	1.20419	7.58315	2.08315
330	2.45019e-14	1	4.11868	1.37289	3.3026	1.32104	7.42128	329.5	4.32769	1.44256	3.24787	1.29915	7.57556	2.07556		-0.299146	0		7.57556			330	2.45019e-14	1	4.11869	1.37289	3.30259	1.32104	7.42128	329.5	4.3277	1.44256	3.24786	1.29915	7.57556	2.07556
331	-0.5	0.5	3.37637	1.12546	3.23096	1.29238	6.60733	330.5	3.72694	1.24231	3.28488	1.31395	7.01182	1.51182		-0.813951	0		7.01181			331	-0.5	0.5	3.37638	1.12546	3.23095	1.29238	6.60733	330.5	3.72695	1.24231	3.28487	1.31395	7.01182	1.51182
332	-0.866025	0.133975	2.53321	0.844402	2.96346	1.18538	5.49667	331.5	2.93141	0.977136	3.11158	1.24463	6.04299	0.542991		-1.11066	-1.22125e-15		6.04297			332	-0.866025	0.133975	2.53321	0.844403	2.96346	1.18538	5.49667	331.5	2.93142	0.977137	3.11157	1.24463	6.04299	0.542991
333	-1	0	1.81512	0.60504	2.57178	1.02871	4.3869	332.5	2.15425	0.718085	2.77441	1.10977	4.92867	-0.571333		-1.10977	6.66134e-16		4.92865			333	-1	0	1.81513	0.605041	2.57178	1.02871	4.3869	332.5	2.15426	0.718085	2.77441	1.10977	4.92867	-0.571333
334	-0.866025	0.133975	1.41452	0.471508	2.16087	0.864347	3.57539	333.5	1.60372	0.534572	2.36372	0.945487	3.96743	-1.53257		-0.811512	0		3.96743			334	-0.866025	0.133975	1.41453	0.471509	2.16086	0.864347	3.57539	333.5	1.60372	0.534573	2.36371	0.945487	3.96743	-1.53257
335	-0.5	0.5	1.43875	0.479585	1.84082	0.736329	3.27958	334.5	1.42731	0.47577	1.98954	0.795815	3.41685	-2.08315		-0.295815	0		3.41686			335	-0.5	0.5	1.43876	0.479585	1.84082	0.736329	3.27958	334.5	1.42732	0.475771	1.98953	0.795814	3.41685	-2.08315
336	-6.86083e-15	1	1.88132	0.627106	1.6974	0.678962	3.57872	335.5	1.67231	0.557436	1.75213	0.700854	3.42444	-2.07556		0.299146	0		3.42446			336	-6.86083e-15	1	1.88132	0.627106	1.6974	0.678962	3.57872	335.5	1.67231	0.557436	1.75213	0.700854	3.42444	-2.07556
337	0.5	1.5	2.62363	0.874544	1.76904	0.707616	4.39267	336.5	2.27306	0.757686	1.71512	0.686049	3.98818	-1.51182		0.813951	0		3.98821			337	0.5	1.5	2.62364	0.874544	1.76904	0.707616	4.39267	336.5	2.27306	0.757686	1.71512	0.686049	3.98818	-1.51182
338	0.866025	1.86603	3.46679	1.1556	2.03654	0.814615	5.50333	337.5	3.06859	1.02286	1.88842	0.755367	4.95701	-0.542991		1.11066	0		4.95705			338	0.866025	1.86603	3.4668	1.1556	2.03653	0.814615	5.50333	337.5	3.0686	1.02286	1.88841	0.755367	4.95701	-0.542991
339	1	2	4.18488	1.39496	2.42822	0.971287	6.6131	338.5	3.84575	1.28192	2.22559	0.890235	6.07133	0.571333		1.10977	0		6.07137			339	1	2	4.18488	1.39496	2.42821	0.971287	6.6131	338.5	3.84575	1.28191	2.22558	0.890235	6.07133	0.571333
340	0.866025	1.86603	4.58548	1.52849	2.83913	1.13565	7.42461	339.5	4.39628	1.46543	2.63628	1.05451	7.03257	1.53257		0.811512	0		7.0326			340	0.866025	1.86603	4.58548	1.52849	2.83913	1.13565	7.42461	339.5	4.39629	1.46543	2.63628	1.05451	7.03257	1.53257
341	0.5	1.5	4.56125	1.52042	3.15918	1.26367	7.72042	340.5	4.57269	1.52423	3.01046	1.20419	7.58315	2.08315		0.295815	0		7.58317			341	0.5	1.5	4.56125	1.52041	3.15917	1.26367	7.72042	340.5	4.5727	1.52423	3.01046	1.20419	7.58315	2.08315
342	1.76415e-14	1	4.11868	1.37289	3.3026	1.32104	7.42128	341.5	4.32769	1.44256	3.24787	1.29915	7.57556	2.07556		-0.299146	0		7.57556			342	1.76415e-14	1	4.11869	1.37289	3.30259	1.32104	7.42128	341.5	4.3277	1.44256	3.24786	1.29915	7.57556	2.07556
343	-0.5	0.5	3.37637	1.12546	3.23096	1.29238	6.60733	342.5	3.72694	1.24231	3.28488	1.31395	7.01182	1.51182		-0.813951	0		7.01181			343	-0.5	0.5	3.37638	1.12546	3.23095	1.29238	6.60733	342.5	3.72695	1.24231	3.28487	1.31395	7.01182	1.51182
344	-0.866025	0.133975	2.53321	0.844402	2.96346	1.18538	5.49667	343.5	2.93141	0.977136	3.11158	1.24463	6.04299	0.542991		-1.11066	0		6.04297			344	-0.866025	0.133975	2.53321	0.844403	2.96346	1.18538	5.49667	343.5	2.93142	0.977137	3.11157	1.24463	6.04299	0.542991
345	-1	0	1.81512	0.60504	2.57178	1.02871	4.3869	344.5	2.15425	0.718085	2.77441	1.10977	4.92867	-0.571333		-1.10977	-1.11022e-15		4.92865			345	-1	0	1.81513	0.605041	2.57178	1.02871	4.3869	344.5	2.15426	0.718085	2.77441	1.10977	4.92867	-0.571333
346	-0.866025	0.133975	1.41452	0.471508	2.16087	0.864347	3.57539	345.5	1.60372	0.534572	2.36372	0.945487	3.96743	-1.53257		-0.811512	3.33067e-16		3.96743			346	-0.866025	0.133975	1.41453	0.471509	2.16086	0.864347	3.57539	345.5	1.60372	0.534573	2.36371	0.945487	3.96743	-1.53257
347	-0.5	0.5	1.43875	0.479585	1.84082	0.736329	3.27958	346.5	1.42731	0.47577	1.98954	0.795815	3.41685	-2.08315		-0.295815	0		3.41686			347	-0.5	0.5	1.43876	0.479585	1.84082	0.736329	3.27958	346.5	1.42732	0.475771	1.98953	0.795814	3.41685	-2.08315
348	-2.84221e-14	1	1.88132	0.627106	1.6974	0.678962	3.57872	347.5	1.67231	0.557436	1.75213	0.700854	3.42444	-2.07556		0.299146	0		3.42446			348	-2.84221e-14	1	1.88132	0.627106	1.6974	0.678962	3.57872	347.5	1.67231	0.557436	1.75213	0.700854	3.42444	-2.07556
349	0.5	1.5	2.62363	0.874544	1.76904	0.707616	4.39267	348.5	2.27306	0.757686	1.71512	0.686049	3.98818	-1.51182		0.813951	0		3.98821			349	0.5	1.5	2.62364	0.874544	1.76904	0.707616	4.39267	348.5	2.27306	0.757686	1.71512	0.686049	3.98818	-1.51182
350	0.866025	1.86603	3.46679	1.1556	2.03654	0.814615	5.50333	349.5	3.06859	1.02286	1.88842	0.755367	4.95701	-0.542991		1.11066	0		4.95705			350	0.866025	1.86603	3.4668	1.1556	2.03653	0.814615	5.50333	349.5	3.0686	1.02286	1.88841	0.755367	4.95701	-0.542991
351	1	2	4.18488	1.39496	2.42822	0.971287	6.6131	350.5	3.84575	1.28192	2.22559	0.890235	6.07133	0.571333		1.10977	0		6.07137			351	1	2	4.18488	1.39496	2.42821	0.971287	6.6131	350.5	3.84575	1.28191	2.22558	0.890235	6.07133	0.571333
352	0.866025	1.86603	4.58548	1.52849	2.83913	1.13565	7.42461	351.5	4.39628	1.46543	2.63628	1.05451	7.03257	1.53257		0.811512	-1.77636e-15		7.0326			352	0.866025	1.86603	4.58548	1.52849	2.83913	1.13565	7.42461	351.5	4.39629	1.46543	2.63628	1.05451	7.03257	1.53257
353	0.5	1.5	4.56125	1.52042	3.15918	1.26367	7.72042	352.5	4.57269	1.52423	3.01046	1.20419	7.58315	2.08315		0.295815	0		7.58317			353	0.5	1.5	4.56125	1.52041	3.15917	1.26367	7.72042	352.5	4.5727	1.52423	3.01046	1.20419	7.58315	2.08315
354	1.07811e-14	1	4.11868	1.37289	3.3026	1.32104	7.42128	353.5	4.32769	1.44256	3.24787	1.29915	7.57556	2.07556		-0.299146	0		7.57556			354	1.07811e-14	1	4.11869	1.37289	3.30259	1.32104	7.42128	353.5	4.3277	1.44256	3.24786	1.29915	7.57556	2.07556
355	-0.5	0.5	3.37637	1.12546	3.23096	1.29238	6.60733	354.5	3.72694	1.24231	3.28488	1.31395	7.01182	1.51182		-0.813951	8.88178e-16		7.01181			355	-0.5	0.5	3.37638	1.12546	3.23095	1.29238	6.60733	354.5	3.72695	1.24231	3.28487	1.31395	7.01182	1.51182
356	-0.866025	0.133975	2.53321	0.844402	2.96346	1.18538	5.49667	355.5	2.93141	0.977136	3.11158	1.24463	6.04299	0.542991		-1.11066	-8.88178e-16		6.04297			356	-0.866025	0.133975	2.53321	0.844403	2.96346	1.18538	5.49667	355.5	2.93142	0.977137	3.11157	1.24463	6.04299	0.542991
357	-1	0	1.81512	0.60504	2.57178	1.02871	4.3869	356.5	2.15425	0.718085	2.77441	1.10977	4.92867	-0.571333		-1.10977	2.22045e-16		4.92865			357	-1	0	1.81513	0.605041	2.57178	1.02871	4.3869	356.5	2.15426	0.718085	2.77441	1.10977	4.92867	-0.571333
358	-0.866025	0.133975	1.41452	0.471508	2.16087	0.864347	3.57539	357.5	1.60372	0.534572	2.36372	0.945487	3.96743	-1.53257		-0.811512	5.55112e-16		3.96743			358	-0.866025	0.133975	1.41453	0.471509	2.16086	0.864347	3.57539	357.5	1.60372	0.534573	2.36371	0.945487	3.96743	-1.53257
359	-0.5	0.5	1.43875	0.479585	1.84082	0.736329	3.27958	358.5	1.42731	0.47577	1.98954	0.795815	3.41685	-2.08315		-0.295815	0		3.41686			359	-0.5	0.5	1.43876	0.479585	1.84082	0.736329	3.27958	358.5	1.42732	0.475771	1.98953	0.795814	3.41685	-2.08315
360	-2.15617e-14	1	1.88132	0.627106	1.6974	0.678962	3.57872	359.5	1.67231	0.557436	1.75213	0.700854	3.42444	-2.07556		0.299146	0		3.42446			360	-2.15617e-14	1	1.88132	0.627106	1.6974	0.678962	3.57872	359.5	1.67231	0.557436	1.75213	0.700854	3.42444	-2.07556
361	0.5	1.5	2.62363	0.874544	1.76904	0.707616	4.39267	360.5	2.27306	0.757686	1.71512	0.686049	3.98818	-1.51182		0.813951	0		3.98821			361	0.5	1.5	2.62364	0.874544	1.76904	0.707616	4.39267	360.5	2.27306	0.757686	1.71512	0.686049	3.98818	-1.51182
362	0.866025	1.86603	3.46679	1.1556	2.03654	0.814615	5.50333	361.5	3.06859	1.02286	1.88842	0.755367	4.95701	-0.542991		1.11066	0		4.95705			362	0.866025	1.86603	3.4668	1.1556	2.03653	0.814615	5.50333	361.5	3.0686	1.02286	1.88841	0.755367	4.95701	-0.542991
363	1	2	4.18488	1.39496	2.42822	0.971287	6.6131	362.5	3.84575	1.28192	2.22559	0.890235	6.07133	0.571333		1.10977	0		6.07137			363	1	2	4.18488	1.39496	2.42821	0.971287	6.6131	362.5	3.84575	1.28191	2.22558	0.890235	6.07133	0.571333
364	0.866025	1.86603	4.58548	1.52849	2.83913	1.13565	7.42461	363.5	4.39628	1.46543	2.63628	1.05451	7.03257	1.53257		0.811512	0		7.0326			364	0.866025	1.86603	4.58548	1.52849	2.83913	1.13565	7.42461	363.5	4.39629	1.46543	2.63628	1.05451	7.03257	1.53257
365	0.5	1.5	4.56125	1.52042	3.15918	1.26367	7.72042	364.5	4.57269	1.52423	3.01046	1.20419	7.58315	2.08315		0.295815	0		7.58317			365	0.5	1.5	4.56125	1.52041	3.15917	1.26367	7.72042	364.5	4.5727	1.52423	3.01046	1.20419	7.58315	2.08315
366	3.23424e-14	1	4.11868	1.37289	3.3026	1.32104	7.42128	365.5	4.32769	1.44256	3.24787	1.29915	7.57556	2.07556		-0.299146	0		7.57556			366	3.23424e-14	1	4.11869	1.37289	3.30259	1.32104	7.42128	365.5	4.3277	1.44256	3.24786	1.29915	7.57556	2.07556
367	-0.5	0.5	3.37637	1.12546	3.23096	1.29238	6.60733	366.5	3.72694	1.24231	3.28488	1.31395	7.01182	1.51182		-0.813951	0		7.01181			367	-0.5	0.5	3.37638	1.12546	3.23095	1.29238	6.60733	366.5	3.72695	1.24231	3.28487	1.31395	7.01182	1.51182
368	-0.866025	0.133975	2.53321	0.844402	2.96346	1.18538	5.49667	367.5	2.93141	0.977136	3.11158	1.24463	6.04299	0.542991		-1.11066	0		6.04297			368	-0.866025	0.133975	2.53321	0.844403	2.96346	1.18538	5.49667	367.5	2.93142	0.977137	3.11157	1.24463	6.04299	0.542991
369	-1	0	1.81512	0.60504	2.57178	1.02871	4.3869	368.5	2.15425	0.718085	2.77441	1.10977	4.92867	-0.571333		-1.10977	4.44089e-16		4.92865			369	-1	0	1.81513	0.605041	2.57178	1.02871	4.3869	368.5	2.15426	0.718085	2.77441	1.10977	4.92867	-0.571333
370	-0.866025	0.133975	1.41452	0.471508	2.16087	0.864347	3.57539	369.5	1.60372	0.534572	2.36372	0.945487	3.96743	-1.53257		-0.811512	-4.44089e-16		3.96743			370	-0.866025	0.133975	1.41453	0.471509	2.16086	0.864347	3.57539	369.5	1.60372	0.534573	2.36371	0.945487	3.96743	-1.53257
371	-0.5	0.5	1.43875	0.479585	1.84082	0.736329	3.27958	370.5	1.42731	0.47577	1.98954	0.795815	3.41685	-2.08315		-0.295815	0		3.41686			371	-0.5	0.5	1.43876	0.479585	1.84082	0.736329	3.27958	370.5	1.42732	0.475771	1.98953	0.795814	3.41685	-2.08315
372	-1.47013e-14	1	1.88132	0.627106	1.6974	0.678962	3.57872	371.5	1.67231	0.557436	1.75213	0.700854	3.42444	-2.07556		0.299146	0		3.42446			372	-1.47013e-14	1	1.88132	0.627106	1.6974	0.678962	3.57872	371.5	1.67231	0.557436	1.75213	0.700854	3.42444	-2.07556
373	0.5	1.5	2.62363	0.874544	1.76904	0.707616	4.39267	372.5	2.27306	0.757686	1.71512	0.686049	3.98818	-1.51182		0.813951	0		3.98821			373	0.5	1.5	2.62364	0.874544	1.76904	0.707616	4.39267	372.5	2.27306	0.757686	1.71512	0.686049	3.98818	-1.51182
374	0.866025	1.86603	3.46679	1.1556	2.03654	0.814615	5.50333	373.5	3.06859	1.02286	1.88842	0.755367	4.95701	-0.542991		1.11066	0		4.95705			374	0.866025	1.86603	3.4668	1.1556	2.03653	0.814615	5.50333	373.5	3.0686	1.02286	1.88841	0.755367	4.95701	-0.542991
375	1	2	4.18488	1.39496	2.42822	0.971287	6.6131	374.5	3.84575	1.28192	2.22559	0.890235	6.07133	0.571333		1.10977	0		6.07137			375	1	2	4.18488	1.39496	2.42821	0.971287	6.6131	374.5	3.84575	1.28191	2.22558	0.890235	6.07133	0.571333
376	0.866025	1.86603	4.58548	1.52849	2.83913	1.13565	7.42461	375.5	4.39628	1.46543	2.63628	1.05451	7.03257	1.53257		0.811512	0		7.0326			376	0.866025	1.86603	4.58548	1.52849	2.83913	1.13565	7.42461	375.5	4.39629	1.46543	2.63628	1.05451	7.03257	1.53257
377	0.5	1.5	4.56125	1.52042	3.15918	1.26367	7.72042	376.5	4.57269	1.52423	3.01046	1.20419	7.58315	2.08315		0.295815	0		7.58317			377	0.5	1.5	4.56125	1.52041	3.15917	1.26367	7.72042	376.5	4.5727	1.52423	3.01046	1.20419	7.58315	2.08315
378	2.5482e-14	1	4.11868	1.37289	3.3026	1.32104	7.42128	377.5	4.32769	1.44256	3.24787	1.29915	7.57556	2.07556		-0.299146	0		7.57556			378	2.5482e-14	1	4.11869	1.37289	3.30259	1.32104	7.42128	377.5	4.3277	1.44256	3.24786	1.29915	7.57556	2.07556
379	-0.5	0.5	3.37637	1.12546	3.23096	1.29238	6.60733	378.5	3.72694	1.24231	3.28488	1.31395	7.01182	1.51182		-0.813951	0		7.01181			379	-0.5	0.5	3.37638	1.12546	3.23095	1.29238	6.60733	378.5	3.72695	1.24231	3.28487	1.31395	7.01182	1.51182
380	-0.866025	0.133975	2.53321	0.844402	2.96346	1.18538	5.49667	379.5	2.93141	0.977136	3.11158	1.24463	6.04299	0.542991		-1.11066	4.44089e-16		6.04297			380	-0.866025	0.133975	2.53321	0.844403	2.96346	1.18538	5.49667	379.5	2.93142	0.977137	3.11157	1.24463	6.04299	0.542991
381	-1	0	1.81512	0.60504	2.57178	1.02871	4.3869	380.5	2.15425	0.718085	2.77441	1.10977	4.92867	-0.571333		-1.10977	-4.44089e-16		4.92865			381	-1	0	1.81513	0.605041	2.57178	1.02871	4.3869	380.5	2.15426	0.718085	2.77441	1.10977	4.92867	-0.571333
382	-0.866025	0.133975	1.41452	0.471508	2.16087	0.864347	3.57539	381.5	1.60372	0.534572	2.36372	0.945487	3.96743	-1.53257		-0.811512	0		3.96743			382	-0.866025	0.133975	1.41453	0.471509	2.16086	0.864347	3.57539	381.5	1.60372	0.534573	2.36371	0.945487	3.96743	-1.53257
383	-0.5	0.5	1.43875	0.479585	1.84082	0.736329	3.27958	382.5	1.42731	0.47577	1.98954	0.795815	3.41685	-2.08315		-0.295815	0		3.41686			383	-0.5	0.5	1.43876	0.479585	1.84082	0.736329	3.27958	382.5	1.42732	0.475771	1.98953	0.795814	3.41685	-2.08315
384	-7.84095e-15	1	1.88132	0.627106	1.6974	0.678962	3.57872	383.5	1.67231	0.557436	1.75213	0.700854	3.42444	-2.07556		0.299146	0		3.42446			384	-7.84095e-15	1	1.88132	0.627106	1.6974	0.678962	3.57872	383.5	1.67231	0.557436	1.75213	0.700854	3.42444	-2.07556
385	0.5	1.5	2.62363	0.874544	1.76904	0.707616	4.39267	384.5	2.27306	0.757686	1.71512	0.686049	3.98818	-1.51182		0.813951	0		3.98821			385	0.5	1.5	2.62364	0.874544	1.76904	0.707616	4.39267	384.5	2.27306	0.757686	1.71512	0.686049	3.98818	-1.51182
386	0.866025	1.86603	3.46679	1.1556	2.03654	0.814615	5.50333	385.5	3.06859	1.02286	1.88842	0.755367	4.95701	-0.542991		1.11066	0		4.95705			386	0.866025	1.86603	3.4668	1.1556	2.03653	0.814615	5.50333	385.5	3.0686	1.02286	1.88841	0.755367	4.95701	-0.542991
387	1	2	4.18488	1.39496	2.42822	0.971287	6.6131	386.5	3.84575	1.28192	2.22559	0.890235	6.07133	0.571333		1.10977	0		6.07137			387	1	2	4.18488	1.39496	2.42821	0.971287	6.6131	386.5	3.84575	1.28191	2.22558	0.890235	6.07133	0.571333
388	0.866025	1.86603	4.58548	1.52849	2.83913	1.13565	7.42461	387.5	4.39628	1.46543	2.63628	1.05451	7.03257	1.53257		0.811512	0		7.0326			388	0.866025	1.86603	4.58548	1.52849	2.83913	1.13565	7.42461	387.5	4.39629	1.46543	2.63628	1.05451	7.03257	1.53257
389	0.5	1.5	4.56125	1.52042	3.15918	1.26367	7.72042	388.5	4.57269	1.52423	3.01046	1.20419	7.58315	2.08315		0.295815	0		7.58317			389	0.5	1.5	4.56125	1.52041	3.15917	1.26367	7.72042	388.5	4.5727	1.52423	3.01046	1.20419	7.58315	2.08315
390	1.86216e-14	1	4.11868	1.37289	3.3026	1.32104	7.42128	389.5	4.32769	1.44256	3.24787	1.29915	7.57556	2.07556		-0.299146	0		7.57556			390	1.86216e-14	1	4.11869	1.37289	3.30259	1.32104	7.42128	389.5	4.3277	1.44256	3.24786	1.29915	7.57556	2.07556
391	-0.5	0.5	3.37637	1.12546	3.23096	1.29238	6.60733	390.5	3.72694	1.24231	3.28488	1.31395	7.01182	1.51182		-0.813951	0		7.01181			391	-0.5	0.5	3.37638	1.12546	3.23095	1.29238	6.60733	390.5	3.72695	1.24231	3.28487	1.31395	7.01182	1.51182
392	-0.866025	0.133975	2.53321	0.844402	2.96346	1.18538	5.49667	391.5	2.93141	0.977136	3.11158	1.24463	6.04299	0.542991		-1.11066	-3.33067e-16		6.04297			392	-0.866025	0.133975	2.53321	0.844403	2.96346	1.18538	5.49667	391.5	2.93142	0.977137	3.11157	1.24463	6.04299	0.542991
393	-1	0	1.81512	0.60504	2.57178	1.02871	4.3869	392.5	2.15425	0.718085	2.77441	1.10977	4.92867	-0.571333		-1.10977	-4.44089e-16		4.92865			393	-1	0	1.81513	0.605041	2.57178	1.02871	4.3869	392.5	2.15426	0.718085	2.77441	1.10977	4.92867	-0.571333
394	-0.866025	0.133975	1.41452	0.471508	2.16087	0.864347	3.57539	393.5	1.60372	0.534572	2.36372	0.945487	3.96743	-1.53257		-0.811512	-3.33067e-16		3.96743			394	-0.866025	0.133975	1.41453	0.471509	2.16086	0.864347	3.57539	393.5	1.60372	0.534573	2.36371	0.945487	3.96743	-1.53257
395	-0.5	0.5	1.43875	0.479585	1.84082	0.736329	3.27958	394.5	1.42731	0.47577	1.98954	0.795815	3.41685	-2.08315		-0.295815	0		3.41686			395	-0.5	0.5	1.43876	0.479585	1.84082	0.736329	3.27958	394.5	1.42732	0.475771	1.98953	0.795814	3.41685	-2.08315
396	-2.94023e-14	1	1.88132	0.627106	1.6974	0.678962	3.57872	395.5	1.67231	0.557436	1.75213	0.700854	3.42444	-2.07556		0.299146	0		3.42446			396	-2.94023e-14	1	1.88132	0.627106	1.6974	0.678962	3.57872	395.5	1.67231	0.557436	1.75213	0.700854	3.42444	-2.07556
397	0.5	1.5	2.62363	0.874544	1.76904	0.707616	4.39267	396.5	2.27306	0.757686	1.71512	0.686049	3.98818	-1.51182		0.813951	0		3.98821			397	0.5	1.5	2.62364	0.874544	1.76904	0.707616	4.39267	396.5	2.27306	0.757686	1.71512	0.686049	3.98818	-1.51182
398	0.866025	1.86603	3.46679	1.1556	2.03654	0.814615	5.50333	397.5	3.06859	1.02286	1.88842	0.755367	4.95701	-0.542991		1.11066	0		4.95705			398	0.866025	1.86603	3.4668	1.1556	2.03653	0.814615	5.50333	397.5	3.0686	1.02286	1.88841	0.755367	4.95701	-0.542991
399	1	2	4.18488	1.39496	2.42822	0.971287	6.6131	398.5	3.84575	1.28192	2.22559	0.890235	6.07133	0.571333		1.10977	0		6.07137			399	1	2	4.18488	1.39496	2.42821	0.971287	6.6131	398.5	3.84575	1.28191	2.22558	0.890235	6.07133	0.571333
400	0.866025	1.86603	4.58548	1.52849	2.83913	1.13565	7.42461	399.5	4.39628	1.46543	2.63628	1.05451	7.03257	1.53257		0.811512	0		7.0326			400	0.866025	1.86603	4.58548	1.52849	2.83913	1.13565	7.42461	399.5	4.39629	1.46543	2.63628	1.05451	7.03257	1.53257
401	0.5	1.5	4.56125	1.52042	3.15918	1.26367	7.72042	400.5	4.57269	1.52423	3.01046	1.20419	7.58315	2.08315		0.295815	0		7.58317			401	0.5	1.5	4.56125	1.52041	3.15917	1.26367	7.72042	400.5	4.5727	1.52423	3.01046	1.20419	7.58315	2.08315
402	1.17612e-14	1	4.11868	1.37289	3.3026	1.32104	7.42128	401.5	4.32769	1.44256	3.24787	1.29915	7.57556	2.07556		-0.299146	0		7.57556			402	1.17612e-14	1	4.11869	1.37289	3.30259	1.32104	7.42128	401.5	4.3277	1.44256	3.24786	1.29915	7.57556	2.07556
403	-0.5	0.5	3.37637	1.12546	3.23096	1.29238	6.60733	402.5	3.72694	1.24231	3.28488	1.31395	7.01182	1.51182		-0.813951	0		7.01181			403	-0.5	0.5	3.37638	1.12546	3.23095	1.29238	6.60733	402.5	3.72695	1.24231	3.28487	1.31395	7.01182	1.51182
404	-0.866025	0.133975	2.53321	0.844402	2.96346	1.18538	5.49667	403.5	2.93141	0.977136	3.11158	1.24463	6.04299	0.542991		-1.11066	4.44089e-16		6.04297			404	-0.866025	0.133975	2.53321	0.844403	2.96346	1.18538	5.49667	403.5	2.93142	0.977137	3.11157	1.24463	6.04299	0.542991
405	-1	0	1.81512	0.60504	2.57178	1.02871	4.3869	404.5	2.15425	0.718085	2.77441	1.10977	4.92867	-0.571333		-1.10977	-4.44089e-16		4.92865			405	-1	0	1.81513	0.605041	2.57178	1.02871	4.3869	404.5	2.15426	0.718085	2.77441	1.10977	4.92867	-0.571333
406	-0.866025	0.133975	1.41452	0.471508	2.16087	0.864347	3.57539	405.5	1.60372	0.534572	2.36372	0.945487	3.96743	-1.53257		-0.811512	5.55112e-16		3.96743			406	-0.866025	0.133975	1.41453	0.471509	2.16086	0.864347	3.57539	405.5	1.60372	0.534573	2.36371	0.945487	3.96743	-1.53257
407	-0.5	0.5	1.43875	0.479585	1.84082	0.736329	3.27958	406.5	1.42731	0.47577	1.98954	0.795815	3.41685	-2.08315		-0.295815	0		3.41686			407	-0.5	0.5	1.43876	0.479585	1.84082	0.736329	3.27958	406.5	1.42732	0.475771	1.98953	0.795814	3.41685	-2.08315
408	-2.25419e-14	1	1.88132	0.627106	1.6974	0.678962	3.57872	407.5	1.67231	0.557436	1.75213	0.700854	3.42444	-2.07556		0.299146	0		3.42446			408	-2.25419e-14	1	1.88132	0.627106	1.6974	0.678962	3.57872	407.5	1.67231	0.557436	1.75213	0.700854	3.42444	-2.07556
409	0.5	1.5	2.62363	0.874544	1.76904	0.707616	4.39267	408.5	2.27306	0.757686	1.71512	0.686049	3.98818	-1.51182		0.813951	0		3.98821			409	0.5	1.5	2.62364	0.874544	1.76904	0.707616	4.39267	408.5	2.27306	0.757686	1.71512	0.686049	3.98818	-1.51182
410	0.866025	1.86603	3.46679	1.1556	2.03654	0.814615	5.50333	409.5	3.06859	1.02286	1.88842	0.755367	4.95701	-0.542991		1.11066	0		4.95705			410	0.866025	1.86603	3.4668	1.1556	2.03653	0.814615	5.50333	409.5	3.0686	1.02286	1.88841	0.755367	4.95701	-0.542991
411	1	2	4.18488	1.39496	2.42822	0.971287	6.6131	410.5	3.84575	1.28192	2.22559	0.890235	6.07133	0.571333		1.10977	0		6.07137			411	1	2	4.18488	1.39496	2.42821	0.971287	6.6131	410.5	3.84575	1.28191	2.22558	0.890235	6.07133	0.571333
412	0.866025	1.86603	4.58548	1.52849	2.83913	1.13565	7.42461	411.5	4.39628	1.46543	2.63628	1.05451	7.03257	1.53257		0.811512	0		7.0326			412	0.866025	1.86603	4.58548	1.52849	2.83913	1.13565	7.42461	411.5	4.39629	1.46543	2.63628	1.05451	7.03257	1.53257
413	0.5	1.5	4.56125	1.52042	3.15918	1.26367	7.72042	412.5	4.57269	1.52423	3.01046	1.20419	7.58315	2.08315		0.295815	0		7.58317			413	0.5	1.5	4.56125	1.52041	3.15917	1.26367	7.72042	412.5	4.5727	1.52423	3.01046	1.20419	7.58315	2.08315
414	3.33225e-14	1	4.11868	1.37289	3.3026	1.32104	7.42128	413.5	4.32769	1.44256	3.24787	1.29915	7.57556	2.07556		-0.299146	0		7.57556			414	3.33225e-14	1	4.11869	1.37289	3.30259	1.32104	7.42128	413.5	4.3277	1.44256	3.24786	1.29915	7.57556	2.07556
415	-0.5	0.5	3.37637	1.12546	3.23096	1.29238	6.60733	414.5	3.72694	1.24231	3.28488	1.31395	7.01182	1.51182		-0.813951	0		7.01181			415	-0.5	0.5	3.37638	1.12546	3.23095	1.29238	6.60733	414.5	3.72695	1.24231	3.28487	1.31395	7.01182	1.51182
416	-0.866025	0.133975	2.53321	0.844402	2.96346	1.18538	5.49667	415.5	2.93141	0.977136	3.11158	1.24463	6.04299	0.542991		-1.11066	5.55112e-16		6.04297			416	-0.866025	0.133975	2.53321	0.844403	2.96346	1.18538	5.49667	415.5	2.93142	0.977137	3.11157	1.24463	6.04299	0.542991
417	-1	0	1.81512	0.60504	2.57178	1.02871	4.3869	416.5	2.15425	0.718085	2.77441	1.10977	4.92867	-0.571333		-1.10977	2.22045e-16		4.92865			417	-1	0	1.81513	0.605041	2.57178	1.02871	4.3869	416.5	2.15426	0.718085	2.77441	1.10977	4.92867	-0.571333
418	-0.866025	0.133975	1.41452	0.471508	2.16087	0.864347	3.57539	417.5	1.60372	0.534572	2.36372	0.945487	3.96743	-1.53257		-0.811512	2.22045e-16		3.96743			418	-0.866025	0.133975	1.41453	0.471509	2.16086	0.864347	3.57539	417.5	1.60372	0.534573	2.36371	0.945487	3.96743	-1.53257
419	-0.5	0.5	1.43875	0.479585	1.84082	0.736329	3.27958	418.5	1.42731	0.47577	1.98954	0.795815	3.41685	-2.08315		-0.295815	0		3.41686			419	-0.5	0.5	1.43876	0.479585	1.84082	0.736329	3.27958	418.5	1.42732	0.475771	1.98953	0.795814	3.41685	-2.08315
420	-1.56815e-14	1	1.88132	0.627106	1.6974	0.678962	3.57872	419.5	1.67231	0.557436	1.75213	0.700854	3.42444	-2.07556		0.299146	0		3.42446			420	-1.56815e-14	1	1.88132	0.627106	1.6974	0.678962	3.57872	419.5	1.67231	0.557436	1.75213	0.700854	3.42444	-2.07556
421	0.5	1.5	2.62363	0.874544	1.76904	0.707616	4.39267	420.5	2.27306	0.757686	1.71512	0.686049	3.98818	-1.51182		0.813951	0		3.98821			421	0.5	1.5	2.62364	0.874544	1.76904	0.707616	4.39267	420.5	2.27306	0.757686	1.71512	0.686049	3.98818	-1.51182
422	0.866025	1.86603	3.46679	1.1556	2.03654	0.814615	5.50333	421.5	3.06859	1.02286	1.88842	0.755367	4.95701	-0.542991		1.11066	0		4.95705			422	0.866025	1.86603	3.4668	1.1556	2.03653	0.814615	5.50333	421.5	3.0686	1.02286	1.88841	0.755367	4.95701	-0.542991
423	1	2	4.18488	1.39496	2.42822	0.971287	6.6131	422.5	3.84575	1.28192	2.22559	0.890235	6.07133	0.571333		1.10977	0		6.07137			423	1	2	4.18488	1.39496	2.42821	0.971287	6.6131	422.5	3.84575	1.28191	2.22558	0.890235	6.07133	0.571333
424	0.866025	1.86603	4.58548	1.52849	2.83913	1.13565	7.42461	423.5	4.39628	1.46543	2.63628	1.05451	7.03257	1.53257		0.811512	0		7.0326			424	0.866025	1.86603	4.58548	1.52849	2.83913	1.13565	7.42461	423.5	4.39629	1.46543	2.63628	1.05451	7.03257	1.53257
425	0.5	1.5	4.56125	1.52042	3.15918	1.26367	7.72042	424.5	4.57269	1.52423	3.01046	1.20419	7.58315	2.08315		0.295815	0		7.58317			425	0.5	1.5	4.56125	1.52041	3.15917	1.26367	7.72042	424.5	4.5727	1.52423	3.01046	1.20419	7.58315	2.08315
426	2.64621e-14	1	4.11868	1.37289	3.3026	1.32104	7.42128	425.5	4.32769	1.44256	3.24787	1.29915	7.57556	2.07556		-0.299146	0		7.57556			426	2.64621e-14	1	4.11869	1.37289	3.30259	1.32104	7.42128	425.5	4.3277	1.44256	3.24786	1.29915	7.57556	2.07556
427	-0.5	0.5	3.37637	1.12546	3.23096	1.29238	6.60733	426.5	3.72694	1.24231	3.28488	1.31395	7.01182	1.51182		-0.813951	0		7.01181			427	-0.5	0.5	3.37638	1.12546	3.23095	1.29238	6.60733	426.5	3.72695	1.24231	3.28487	1.31395	7.01182	1.51182
428	-0.866025	0.133975	2.53321	0.844402	2.96346	1.18538	5.49667	427.5	2.93141	0.977136	3.11158	1.24463	6.04299	0.542991		-1.11066	1.11022e-15		6.04297			428	-0.866025	0.133975	2.53321	0.844403	2.96346	1.18538	5.49667	427.5	2.93142	0.977137	3.11157	1.24463	6.04299	0.542991
429	-1	0	1.81512	0.60504	2.57178	1.02871	4.3869	428.5	2.15425	0.718085	2.77441	1.10977	4.92867	-0.571333		-1.10977	-8.88178e-16		4.92865			429	-1	0	1.81513	0.605041	2.57178	1.02871	4.3869	428.5	2.15426	0.718085	2.77441	1.10977	4.92867	-0.571333
430	-0.866025	0.133975	1.41452	0.471508	2.16087	0.864347	3.57539	429.5	1.60372	0.534572	2.36372	0.945487	3.96743	-1.53257		-0.811512	5.55112e-16		3.96743			430	-0.866025	0.133975	1.41453	0.471509	2.16086	0.864347	3.57539	429.5	1.60372	0.534573	2.36371	0.945487	3.96743	-1.53257
431	-0.5	0.5	1.43875	0.479585	1.84082	0.736329	3.27958	430.5	1.42731	0.47577	1.98954	0.795815	3.41685	-2.08315		-0.295815	-6.66134e-16		3.41686			431	-0.5	0.5	1.43876	0.479585	1.84082	0.736329	3.27958	430.5	1.42732	0.475771	1.98953	0.795814	3.41685	-2.08315
432	-3.72428e-14	1	1.88132	0.627106	1.6974	0.678962	3.57872	431.5	1.67231	0.557436	1.75213	0.700854	3.42444	-2.07556		0.299146	0		3.42446			432	-3.72428e-14	1	1.88132	0.627106	1.6974	0.678962	3.57872	431.5	1.67231	0.557436	1.75213	0.700854	3.42444	-2.07556
433	0.5	1.5	2.62363	0.874544	1.76904	0.707616	4.39267	432.5	2.27306	0.757686	1.71512	0.686049	3.98818	-1.51182		0.813951	0		3.98821			433	0.5	1.5	2.62364	0.874544	1.76904	0.707616	4.39267	432.5	2.27306	0.757686	1.71512	0.686049	3.98818	-1.51182
434	0.866025	1.86603	3.46679	1.1556	2.03654	0.814615	5.50333	433.5	3.06859	1.02286	1.88842	0.755367	4.95701	-0.542991		1.11066	0		4.95705			434	0.866025	1.86603	3.4668	1.1556	2.03653	0.814615	5.50333	433.5	3.0686	1.02286	1.88841	0.755367	4.95701	-0.542991
435	1	2	4.18488	1.39496	2.42822	0.971287	6.6131	434.5	3.84575	1.28192	2.22559	0.890235	6.07133	0.571333		1.10977	0		6.07137			435	1	2	4.18488	1.39496	2.42821	0.971287	6.6131	434.5	3.84575	1.28191	2.22558	0.890235	6.07133	0.571333
436	0.866025	1.86603	4.58548	1.52849	2.83913	1.13565	7.42461	435.5	4.39628	1.46543	2.63628	1.05451	7.03257	1.53257		0.811512	0		7.0326			436	0.866025	1.86603	4.58548	1.52849	2.83913	1.13565	7.42461	435.5	4.39629	1.46543	2.63628	1.05451	7.03257	1.53257
437	0.5	1.5	4.56125	1.52042	3.15918	1.26367	7.72042	436.5	4.57269	1.52423	3.01046	1.20419	7.58315	2.08315		0.295815	0		7.58317			437	0.5	1.5	4.56125	1.52041	3.15917	1.26367	7.72042	436.5	4.5727	1.52423	3.01046	1.20419	7.58315	2.08315
438	1.96017e-14	1	4.11868	1.37289	3.3026	1.32104	7.42128	437.5	4.32769	1.44256	3.24787	1.29915	7.57556	2.07556		-0.299146	0		7.57556			438	1.96017e-14	1	4.11869	1.37289	3.30259	1.32104	7.42128	437.5	4.3277	1.44256	3.24786	1.29915	7.57556	2.07556
439	-0.5	0.5	3.37637	1.12546	3.23096	1.29238	6.60733	438.5	3.72694	1.24231	3.28488	1.31395	7.01182	1.51182		-0.813951	0		7.01181			439	-0.5	0.5	3.37638	1.12546	3.23095	1.29238	6.60733	438.5	3.72695	1.24231	3.28487	1.31395	7.01182	1.51182
440	-0.866025	0.133975	2.53321	0.844402	2.96346	1.18538	5.49667	439.5	2.93141	0.977136	3.11158	1.24463	6.04299	0.542991		-1.11066	-5.55112e-16		6.04297			440	-0.866025	0.133975	2.53321	0.844403	2.96346	1.18538	5.49667	439.5	2.93142	0.977137	3.11157	1.24463	6.04299	0.542991
441	-1	0	1.81512	0.60504	2.57178	1.02871	4.3869	440.5	2.15425	0.718085	2.77441	1.10977	4.92867	-0.571333		-1.10977	6.66134e-16		4.92865			441	-1	0	1.81513	0.605041	2.57178	1.02871	4.3869	440.5	2.15426	0.718085	2.77441	1.10977	4.92867	-0.571333
442	-0.866025	0.133975	1.41452	0.471508	2.16087	0.864347	3.57539	441.5	1.60372	0.534572	2.36372	0.945487	3.96743	-1.53257		-0.811512	0		3.96743			442	-0.866025	0.133975	1.41453	0.471509	2.16086	0.864347	3.57539	441.5	1.60372	0.534573	2.36371	0.945487	3.96743	-1.53257
443	-0.5	0.5	1.43875	0.479585	1.84082	0.736329	3.27958	442.5	1.42731	0.47577	1.98954	0.795815	3.41685	-2.08315		-0.295815	0		3.41686			443	-0.5	0.5	1.43876	0.479585	1.84082	0.736329	3.27958	442.5	1.42732	0.475771	1.98953	0.795814	3.41685	-2.08315
444	-3.03824e-14	1	1.88132	0.627106	1.6974	0.678962	3.57872	443.5	1.67231	0.557436	1.75213	0.700854	3.42444	-2.07556		0.299146	0		3.42446			444	-3.03824e-14	1	1.88132	0.627106	1.6974	0.678962	3.57872	443.5	1.67231	0.557436	1.75213	0.700854	3.42444	-2.07556
445	0.5	1.5	2.62363	0.874544	1.76904	0.707616	4.39267	444.5	2.27306	0.757686	1.71512	0.686049	3.98818	-1.51182		0.813951	0		3.98821			445	0.5	1.5	2.62364	0.874544	1.76904	0.707616	4.39267	444.5	2.27306	0.757686	1.71512	0.686049	3.98818	-1.51182
446	0.866025	1.86603	3.46679	1.1556	2.03654	0.814615	5.50333	445.5	3.06859	1.02286	1.88842	0.755367	4.95701	-0.542991		1.11066	0		4.95705			446	0.866025	1.86603	3.4668	1.1556	2.03653	0.814615	5.50333	445.5	3.0686	1.02286	1.88841	0.755367	4.95701	-0.542991
447	1	2	4.18488	1.39496	2.42822	0.971287	6.6131	446.5	3.84575	1.28192	2.22559	0.890235	6.07133	0.571333		1.10977	0		6.07137			447	1	2	4.18488	1.39496	2.42821	0.971287	6.6131	446.5	3.84575	1.28191	2.22558	0.890235	6.07133	0.571333
448	0.866025	1.86603	4.58548	1.52849	2.83913	1.13565	7.42461	447.5	4.39628	1.46543	2.63628	1.05451	7.03257	1.53257		0.811512	0		7.0326			448	0.866025	1.86603	4.58548	1.52849	2.83913	1.13565	7.42461	447.5	4.39629	1.46543	2.63628	1.05451	7.03257	1.53257
449	0.5	1.5	4.56125	1.52042	3.15918	1.26367	7.72042	448.5	4.57269	1.52423	3.01046	1.20419	7.58315	2.08315		0.295815	0		7.58317			449	0.5	1.5	4.56125	1.52041	3.15917	1.26367	7.72042	448.5	4.5727	1.52423	3.01046	1.20419	7.58315	2.08315
450	1.27413e-14	1	4.11868	1.37289	3.3026	1.32104	7.42128	449.5	4.32769	1.44256	3.24787	1.29915	7.57556	2.07556		-0.299146	0		7.57556			450	1.27413e-14	1	4.11869	1.37289	3.30259	1.32104	7.42128	449.5	4.3277	1.44256	3.24786	1.29915	7.57556	2.07556
451	-0.5	0.5	3.37637	1.12546	3.23096	1.29238	6.60733	450.5	3.72694	1.24231	3.28488	1.31395	7.01182	1.51182		-0.813951	0		7.01181			451	-0.5	0.5	3.37638	1.12546	3.23095	1.29238	6.60733	450.5	3.72695	1.24231	3.28487	1.31395	7.01182	1.51182
452	-0.866025	0.133975	2.53321	0.844402	2.96346	1.18538	5.49667	451.5	2.93141	0.977136	3.11158	1.24463	6.04299	0.542991		-1.11066	0		6.04297			452	-0.866025	0.133975	2.53321	0.844403	2.96346	1.18538	5.49667	451.5	2.93142	0.977137	3.11157	1.24463	6.04299	0.542991
453	-1	0	1.81512	0.60504	2.57178	1.02871	4.3869	452.5	2.15425	0.718085	2.77441	1.10977	4.92867	-0.571333		-1.10977	-4.44089e-16		4.92865			453	-1	0	1.81513	0.605041	2.57178	1.02871	4.3869	452.5	2.15426	0.718085	2.77441	1.10977	4.92867	-0.571333
454	-0.866025	0.133975	1.41452	0.471508	2.16087	0.864347	3.57539	453.5	1.60372	0.534572	2.36372	0.945487	3.96743	-1.53257		-0.811512	2.22045e-16		3.96743			454	-0.866025	0.133975	1.41453	0.471509	2.16086	0.864347	3.57539	453.5	1.60372	0.534573	2.36371	0.945487	3.96743	-1.53257
455	-0.5	0.5	1.43875	0.479585	1.84082	0.736329	3.27958	454.5	1.42731	0.47577	1.98954	0.795815	3.41685	-2.08315		-0.295815	-6.66134e-16		3.41686			455	-0.5	0.5	1.43876	0.479585	1.84082	0.736329	3.27958	454.5	1.42732	0.475771	1.98953	0.795814	3.41685	-2.08315
456	-2.3522e-14	1	1.88132	0.627106	1.6974	0.678962	3.57872	455.5	1.67231	0.557436	1.75213	0.700854	3.42444	-2.07556		0.299146	0		3.42446			456	-2.3522e-14	1	1.88132	0.627106	1.6974	0.678962	3.57872	455.5	1.67231	0.557436	1.75213	0.700854	3.42444	-2.07556
457	0.5	1.5	2.62363	0.874544	1.76904	0.707616	4.39267	456.5	2.27306	0.757686	1.71512	0.686049	3.98818	-1.51182		0.813951	0		3.98821			457	0.5	1.5	2.62364	0.874544	1.76904	0.707616	4.39267	456.5	2.27306	0.757686	1.71512	0.686049	3.98818	-1.51182
458	0.866025	1.86603	3.46679	1.1556	2.03654	0.814615	5.50333	457.5	3.06859	1.02286	1.88842	0.755367	4.95701	-0.542991		1.11066	0		4.95705			458	0.866025	1.86603	3.4668	1.1556	2.03653	0.814615	5.50333	457.5	3.0686	1.02286	1.88841	0.755367	4.95701	-0.542991
459	1	2	4.18488	1.39496	2.42822	0.971287	6.6131	458.5	3.84575	1.28192	2.22559	0.890235	6.07133	0.571333		1.10977	0		6.07137			459	1	2	4.18488	1.39496	2.42821	0.971287	6.6131	458.5	3.84575	1.28191	2.22558	0.890235	6.07133	0.571333
460	0.866025	1.86603	4.58548	1.52849	2.83913	1.13565	7.42461	459.5	4.39628	1.46543	2.63628	1.05451	7.03257	1.53257		0.811512	0		7.0326			460	0.866025	1.86603	4.58548	1.52849	2.83913	1.13565	7.42461	459.5	4.39629	1.46543	2.63628	1.05451	7.03257	1.53257
461	0.5	1.5	4.56125	1.52042	3.15918	1.26367	7.72042	460.5	4.57269	1.52423	3.01046	1.20419	7.58315	2.08315		0.295815	0		7.58317			461	0.5	1.5	4.56125	1.52041	3.15917	1.26367	7.72042	460.5	4.5727	1.52423	3.01046	1.20419	7.58315	2.08315
462	3.43026e-14	1	4.11868	1.37289	3.3026	1.32104	7.42128	461.5	4.32769	1.44256	3.24787	1.29915	7.57556	2.07556		-0.299146	0		7.57556			462	3.43026e-14	1	4.11869	1.37289	3.30259	1.32104	7.42128	461.5	4.3277	1.44256	3.24786	1.29915	7.57556	2.07556
463	-0.5	0.5	3.37637	1.12546	3.23096	1.29238	6.60733	462.5	3.72694	1.24231	3.28488	1.31395	7.01182	1.51182		-0.813951	0		7.01181			463	-0.5	0.5	3.37638	1.12546	3.23095	1.29238	6.60733	462.5	3.72695	1.24231	3.28487	1.31395	7.01182	1.51182
464	-0.866025	0.133975	2.53321	0.844402	2.96346	1.18538	5.49667	463.5	2.93141	0.977136	3.11158	1.24463	6.04299	0.542991		-1.11066	-6.66134e-16		6.04297			464	-0.866025	0.133975	2.53321	0.844403	2.96346	1.18538	5.49667	463.5	2.93142	0.977137	3.11157	1.24463	6.04299	0.542991
465	-1	0	1.81512	0.60504	2.57178	1.02871	4.3869	464.5	2.15425	0.718085	2.77441	1.10977	4.92867	-0.571333		-1.10977	-2.22045e-16		4.92865			465	-1	0	1.81513	0.605041	2.57178	1.02871	4.3869	464.5	2.15426	0.718085	2.77441	1.10977	4.92867	-0.571333
466	-0.866025	0.133975	1.41452	0.471508	2.16087	0.864347	3.57539	465.5	1.60372	0.534572	2.36372	0.945487	3.96743	-1.53257		-0.811512	5.55112e-16		3.96743			466	-0.866025	0.133975	1.41453	0.471509	2.16086	0.864347	3.57539	465.5	1.60372	0.534573	2.36371	0.945487	3.96743	-1.53257
467	-0.5	0.5	1.43875	0.479585	1.84082	0.736329	3.27958	466.5	1.42731	0.47577	1.98954	0.795815	3.41685	-2.08315		-0.295815	0		3.41686			467	-0.5	0.5	1.43876	0.479585	1.84082	0.736329	3.27958	466.5	1.42732	0.475771	1.98953	0.795814	3.41685	-2.08315
468	-1.66616e-14	1	1.88132	0.627106	1.6974	0.678962	3.57872	467.5	1.67231	0.557436	1.75213	0.700854	3.42444	-2.07556		0.299146	0		3.42446			468	-1.66616e-14	1	1.88132	0.627106	1.6974	0.678962	3.57872	467.5	1.67231	0.557436	1.75213	0.700854	3.42444	-2.07556
469	0.5	1.5	2.62363	0.874544	1.76904	0.707616	4.39267	468.5	2.27306	0.757686	1.71512	0.686049	3.98818	-1.51182		0.813951	0		3.98821			469	0.5	1.5	2.62364	0.874544	1.76904	0.707616	4.39267	468.5	2.27306	0.757686	1.71512	0.686049	3.98818	-1.51182
470	0.866025	1.86603	3.46679	1.1556	2.03654	0.814615	5.50333	469.5	3.06859	1.02286	1.88842	0.755367	4.95701	-0.542991		1.11066	0		4.95705			470	0.866025	1.86603	3.4668	1.1556	2.03653	0.814615	5.50333	469.5	3.0686	1.02286	1.88841	0.755367	4.95701	-0.542991
471	1	2	4.18488	1.39496	2.42822	0.971287	6.6131	470.5	3.84575	1.28192	2.22559	0.890235	6.07133	0.571333		1.10977	0		6.07137			471	1	2	4.18488	1.39496	2.42821	0.971287	6.6131	470.5	3.84575	1.28191	2.22558	0.890235	6.07133	0.571333
472	0.866025	1.86603	4.58548	1.52849	2.83913	1.13565	7.42461	471.5	4.39628	1.46543	2.63628	1.05451	7.03257	1.53257		0.811512	0		7.0326			472	0.866025	1.86603	4.58548	1.52849	2.83913	1.13565	7.42461	471.5	4.39629	1.46543	2.63628	1.05451	7.03257	1.53257
473	0.5	1.5	4.56125	1.52042	3.15918	1.26367	7.72042	472.5	4.57269	1.52423	3.01046	1.20419	7.58315	2.08315		0.295815	0		7.58317			473	0.5	1.5	4.56125	1.52041	3.15917	1.26367	7.72042	472.5	4.5727	1.52423	3.01046	1.20419	7.58315	2.08315
474	2.74422e-14	1	4.11868	1.37289	3.3026	1.32104	7.42128	473.5	4.32769	1.44256	3.24787	1.29915	7.57556	2.07556		-0.299146	0		7.57556			474	2.74422e-14	1	4.11869	1.37289	3.30259	1.32104	7.42128	473.5	4.3277	1.44256	3.24786	1.29915	7.57556	2.07556
475	-0.5	0.5	3.37637	1.12546	3.23096	1.29238	6.60733	474.5	3.72694	1.24231	3.28488	1.31395	7.01182	1.51182		-0.813951	0		7.01181			475	-0.5	0.5	3.37638	1.12546	3.23095	1.29238	6.60733	474.5	3.72695	1.24231	3.28487	1.31395	7.01182	1.51182
476	-0.866025	0.133975	2.53321	0.844402	2.96346	1.18538	5.49667	475.5	2.93141	0.977136	3.11158	1.24463	6.04299	0.542991		-1.11066	0		6.04297			476	-0.866025	0.133975	2.53321	0.844403	2.96346	1.18538	5.49667	475.5	2.93142	0.977137	3.11157	1.24463	6.04299	0.542991
477	-1	0	1.81512	0.60504	2.57178	1.02871	4.3869	476.5	2.15425	0.718085	2.77441	1.10977	4.92867	-0.571333		-1.10977	4.44089e-16		4.92865			477	-1	0	1.81513	0.605041	2.57178	1.02871	4.3869	476.5	2.15426	0.718085	2.77441	1.10977	4.92867	-0.571333
478	-0.866025	0.133975	1.41452	0.471508	2.16087	0.864347	3.57539	477.5	1.60372	0.534572	2.36372	0.945487	3.96743	-1.53257		-0.811512	-6.66134e-16		3.96743			478	-0.866025	0.133975	1.41453	0.471509	2.16086	0.864347	3.57539	477.5	1.60372	0.534573	2.36371	0.945487	3.96743	-1.53257
479	-0.5	0.5	1.43875	0.479585	1.84082	0.736329	3.27958	478.5	1.42731	0.47577	1.98954	0.795815	3.41685	-2.08315		-0.295815	0		3.41686			479	-0.5	0.5	1.43876	0.479585	1.84082	0.736329	3.27958	478.5	1.42732	0.475771	1.98953	0.795814	3.41685	-2.08315
480	-3.82229e-14	1	1.88132	0.627106	1.6974	0.678962	3.57872	479.5	1.67231	0.557436	1.75213	0.700854	3.42444	-2.07556		0.299146	0		3.42446			480	-3.82229e-14	1	1.88132	0.627106	1.6974	0.678962	3.57872	479.5	1.67231	0.557436	1.75213	0.700854	3.42444	-2.07556
481	0.5	1.5	2.62363	0.874544	1.76904	0.707616	4.39267	480.5	2.27306	0.757686	1.71512	0.686049	3.98818	-1.51182		0.813951	0		3.98821			481	0.5	1.5	2.62364	0.874544	1.76904	0.707616	4.39267	480.5	2.27306	0.757686	1.71512	0.686049	3.98818	-1.51182
482	0.866025	1.86603	3.46679	1.1556	2.03654	0.814615	5.50333	481.5	3.06859	1.02286	1.88842	0.755367	4.95701	-0.542991		1.11066	0		4.95705			482	0.866025	1.86603	3.4668	1.1556	2.03653	0.814615	5.50333	481.5	3.0686	1.02286	1.88841	0.755367	4.95701	-0.542991
483	1	2	4.18488	1.39496	2.42822	0.971287	6.6131	482.5	3.84575	1.28192	2.22559	0.890235	6.07133	0.571333		1.10977	0		6.07137			483	1	2	4.18488	1.39496	2.42821	0.971287	6.6131	482.5	3.84575	1.28191	2.22558	0.890235	6.07133	0.571333
484	0.866025	1.86603	4.58548	1.52849	2.83913	1.13565	7.42461	483.5	4.39628	1.46543	2.63628	1.05451	7.03257	1.53257		0.811512	0		7.0326			484	0.866025	1.86603	4.58548	1.52849	2.83913	1.13565	7.42461	483.5	4.39629	1.46543	2.63628	1.05451	7.03257	1.53257
485	0.5	1.5	4.56125	1.52042	3.15918	1.26367	7.72042	484.5	4.57269	1.52423	3.01046	1.20419	7.58315	2.08315		0.295815	0		7.58317			485	0.5	1.5	4.56125	1.52041	3.15917	1.26367	7.72042	484.5	4.5727	1.52423	3.01046	1.20419	7.58315	2.08315
486	2.05818e-14	1	4.11868	1.37289	3.3026	1.32104	7.42128	485.5	4.32769	1.44256	3.24787	1.29915	7.57556	2.07556		-0.299146	0		7.57556			486	2.05818e-14	1	4.11869	1.37289	3.30259	1.32104	7.42128	485.5	4.3277	1.44256	3.24786	1.29915	7.57556	2.07556
487	-0.5	0.5	3.37637	1.12546	3.23096	1.29238	6.60733	486.5	3.72694	1.24231	3.28488	1.31395	7.01182	1.51182		-0.813951	0		7.01181			487	-0.5	0.5	3.37638	1.12546	3.23095	1.29238	6.60733	486.5	3.72695	1.24231	3.28487	1.31395	7.01182	1.51182
488	-0.866025	0.133975	2.53321	0.844402	2.96346	1.18538	5.49667	487.5	2.93141	0.977136	3.11158	1.24463	6.04299	0.542991		-1.11066	-4.44089e-16		6.04297			488	-0.866025	0.133975	2.53321	0.844403	2.96346	1.18538	5.49667	487.5	2.93142	0.977137	3.11157	1.24463	6.04299	0.542991
489	-1	0	1.81512	0.60504	2.57178	1.02871	4.3869	488.5	2.15425	0.718085	2.77441	1.10977	4.92867	-0.571333		-1.10977	4.44089e-16		4.92865			489	-1	0	1.81513	0.605041	2.57178	1.02871	4.3869	488.5	2.15426	0.718085	2.77441	1.10977	4.92867	-0.571333
490	-0.866025	0.133975	1.41452	0.471508	2.16087	0.864347	3.57539	489.5	1.60372	0.534572	2.36372	0.945487	3.96743	-1.53257		-0.811512	-4.44089e-16		3.96743			490	-0.866025	0.133975	1.41453	0.471509	2.16086	0.864347	3.57539	489.5	1.60372	0.534573	2.36371	0.945487	3.96743	-1.53257
491	-0.5	0.5	1.43875	0.479585	1.84082	0.736329	3.27958	490.5	1.42731	0.47577	1.98954	0.795815	3.41685	-2.08315		-0.295815	0		3.41686			491	-0.5	0.5	1.43876	0.479585	1.84082	0.736329	3.27958	490.5	1.42732	0.475771	1.98953	0.795814	3.41685	-2.08315
492	-3.13625e-14	1	1.88132	0.627106	1.6974	0.678962	3.57872	491.5	1.67231	0.557436	1.75213	0.700854	3.42444	-2.07556		0.299146	0		3.42446			492	-3.13625e-14	1	1.88132	0.627106	1.6974	0.678962	3.57872	491.5	1.67231	0.557436	1.75213	0.700854	3.42444	-2.07556
493	0.5	1.5	2.62363	0.874544	1.76904	0.707616	4.39267	492.5	2.27306	0.757686	1.71512	0.686049	3.98818	-1.51182		0.813951	0		3.98821			493	0.5	1.5	2.62364	0.874544	1.76904	0.707616	4.39267	492.5	2.27306	0.757686	1.71512	0.686049	3.98818	-1.51182
494	0.866025	1.86603	3.46679	1.1556	2.03654	0.814615	5.50333	493.5	3.06859	1.02286	1.88842	0.755367	4.95701	-0.542991		1.11066	0		4.95705			494	0.866025	1.86603	3.4668	1.1556	2.03653	0.814615	5.50333	493.5	3.0686	1.02286	1.88841	0.755367	4.95701	-0.542991
495	1	2	4.18488	1.39496	2.42822	0.971287	6.6131	494.5	3.84575	1.28192	2.22559	0.890235	6.07133	0.571333		1.10977	0		6.07137			495	1	2	4.18488	1.39496	2.42821	0.971287	6.6131	494.5	3.84575	1.28191	2.22558	0.890235	6.07133	0.571333
496	0.866025	1.86603	4.58548	1.52849	2.83913	1.13565	7.42461	495.5	4.39628	1.46543	2.63628	1.05451	7.03257	1.53257		0.811512	0		7.0326			496	0.866025	1.86603	4.58548	1.52849	2.83913	1.13565	7.42461	495.5	4.39629	1.46543	2.63628	1.05451	7.03257	1.53257
497	0.5	1.5	4.56125	1.52042	3.15918	1.26367	7.72042	496.5	4.57269	1.52423	3.01046	1.20419	7.58315	2.08315		0.295815	0		7.58317			497	0.5	1.5	4.56125	1.52041	3.15917	1.26367	7.72042	496.5	4.5727	1.52423	3.01046	1.20419	7.58315	2.08315
498	4.21432e-14	1	4.11868	1.37289	3.3026	1.32104	7.42128	497.5	4.32769	1.44256	3.24787	1.29915	7.57556	2.07556		-0.299146	0		7.57556			498	4.21432e-14	1	4.11869	1.37289	3.30259	1.32104	7.42128	497.5	4.3277	1.44256	3.24786	1.29915	7.57556	2.07556
499	-0.5	0.5	3.37637	1.12546	3.23096	1.29238	6.60733	498.5	3.72694	1.24231	3.28488	1.31395	7.01182	1.51182		-0.813951	0		7.01181			499	-0.5	0.5	3.37638	1.12546	3.23095	1.29238	6.60733	498.5	3.72695	1.24231	3.28487	1.31395	7.01182	1.51182
500	-0.866025	0.133975	2.53321	0.844402	2.96346	1.18538	5.49667	499.5	2.93141	0.977136	3.11158	1.24463	6.04299	0.542991		-1.11066	5.55112e-16		6.04297			500	-0.866025	0.133975	2.53321	0.844403	2.96346	1.18538	5.49667	499.5	2.93142	0.977137	3.11157	1.24463	6.04299	0.542991
501	-1	0	1.81512	0.60504	2.57178	1.02871	4.3869	500.5	2.15425	0.718085	2.77441	1.10977	4.92867	-0.571333		-1.10977	2.22045e-16		4.92865			501	-1	0	1.81513	0.605041	2.57178	1.02871	4.3869	500.5	2.15426	0.718085	2.77441	1.10977	4.92867	-0.571333
502	-0.866025	0.133975	1.41452	0.471508	2.16087	0.864347	3.57539	501.5	1.60372	0.534572	2.36372	0.945487	3.96743	-1.53257		-0.811512	-3.33067e-16		3.96743			502	-0.866025	0.133975	1.41453	0.471509	2.16086	0.864347	3.57539	501.5	1.60372	0.534573	2.36371	0.945487	3.96743	-1.53257
503	-0.5	0.5	1.43875	0.479585	1.84082	0.736329	3.27958	502.5	1.42731	0.47577	1.98954	0.795815	3.41685	-2.08315		-0.295815	0		3.41686			503	-0.5	0.5	1.43876	0.479585	1.84082	0.736329	3.27958	502.5	1.42732	0.475771	1.98953	0.795814	3.41685	-2.08315
504	-5.29238e-14	1	1.88132	0.627106	1.6974	0.678962	3.57872	503.5	1.67231	0.557436	1.75213	0.700854	3.42444	-2.07556		0.299146	0		3.42446			504	-5.29238e-14	1	1.88132	0.627106	1.6974	0.678962	3.57872	503.5	1.67231	0.557436	1.75213	0.700854	3.42444	-2.07556
505	0.5	1.5	2.62363	0.874544	1.76904	0.707616	4.39267	504.5	2.27306	0.757686	1.71512	0.686049	3.98818	-1.51182		0.813951	0		3.98821			505	0.5	1.5	2.62364	0.874544	1.76904	0.707616	4.39267	504.5	2.27306	0.757686	1.71512	0.686049	3.98818	-1.51182
506	0.866025	1.86603	3.46679	1.1556	2.03654	0.814615	5.50333	505.5	3.06859	1.02286	1.88842	0.755367	4.95701	-0.542991		1.11066	0		4.95705			506	0.866025	1.86603	3.4668	1.1556	2.03653	0.814615	5.50333	505.5	3.0686	1.02286	1.88841	0.755367	4.95701	-0.542991
507	1	2	4.18488	1.39496	2.42822	0.971287	6.6131	506.5	3.84575	1.28192	2.22559	0.890235	6.07133	0.571333		1.10977	0		6.07137			507	1	2	4.18488	1.39496	2.42821	0.971287	6.6131	506.5	3.84575	1.28191	2.22558	0.890235	6.07133	0.571333
508	0.866025	1.86603	4.58548	1.52849	2.83913	1.13565	7.42461	507.5	4.39628	1.46543	2.63628	1.05451	7.03257	1.53257		0.811512	0		7.0326			508	0.866025	1.86603	4.58548	1.52849	2.83913	1.13565	7.42461	507.5	4.39629	1.46543	2.63628	1.05451	7.03257	1.53257
509	0.5	1.5	4.56125	1.52042	3.15918	1.26367	7.72042	508.5	4.57269	1.52423	3.01046	1.20419	7.58315	2.08315		0.295815	0		7.58317			509	0.5	1.5	4.56125	1.52041	3.15917	1.26367	7.72042	508.5	4.5727	1.52423	3.01046	1.20419	7.58315	2.08315
510	6.86105e-15	1	4.11868	1.37289	3.3026	1.32104	7.42128	509.5	4.32769	1.44256	3.24787	1.29915	7.57556	2.07556		-0.299146	0		7.57556			510	6.86105e-15	1	4.11869	1.37289	3.30259	1.32104	7.42128	509.5	4.3277	1.44256	3.24786	1.29915	7.57556	2.07556
511	-0.5	0.5	3.37637	1.12546	3.23096	1.29238	6.60733	510.5	3.72694	1.24231	3.28488	1.31395	7.01182	1.51182		-0.813951	0		7.01181			511	-0.5	0.5	3.37638	1.12546	3.23095	1.29238	6.60733	510.5	3.72695	1.24231	3.28487	1.31395	7.01182	1.51182
512	-0.866025	0.133975	2.53321	0.844402	2.96346	1.18538	5.49667	511.5	2.93141	0.977136	3.11158	1.24463	6.04299	0.542991		-1.11066	-6.66134e-16		6.04297			512	-0.866025	0.133975	2.53321	0.844403	2.96346	1.18538	5.49667	511.5	2.93142	0.977137	3.11157	1.24463	6.04299	0.542991
513	-1	0	1.81512	0.60504	2.57178	1.02871	4.3869	512.5	2.15425	0.718085	2.77441	1.10977	4.92867	-0.571333		-1.10977	8.88178e-16		4.92865			513	-1	0	1.81513	0.605041	2.57178	1.02871	4.3869	512.5	2.15426	0.718085	2.77441	1.10977	4.92867	-0.571333
514	-0.866025	0.133975	1.41452	0.471508	2.16087	0.864347	3.57539	513.5	1.60372	0.534572	2.36372	0.945487	3.96743	-1.53257		-0.811512	-4.44089e-16		3.96743			514	-0.866025	0.133975	1.41453	0.471509	2.16086	0.864347	3.57539	513.5	1.60372	0.534573	2.36371	0.945487	3.96743	-1.53257
515	-0.5	0.5	1.43875	0.479585	1.84082	0.736329	3.27958	514.5	1.42731	0.47577	1.98954	0.795815	3.41685	-2.08315		-0.295815	0		3.41686			515	-0.5	0.5	1.43876	0.479585	1.84082	0.736329	3.27958	514.5	1.42732	0.475771	1.98953	0.795814	3.41685	-2.08315
516	-1.76417e-14	1	1.88132	0.627106	1.6974	0.678962	3.57872	515.5	1.67231	0.557436	1.75213	0.700854	3.42444	-2.07556		0.299146	0		3.42446			516	-1.76417e-14	1	1.88132	0.627106	1.6974	0.678962	3.57872	515.5	1.67231	0.557436	1.75213	0.700854	3.42444	-2.07556
517	0.5	1.5	2.62363	0.874544	1.76904	0.707616	4.39267	516.5	2.27306	0.757686	1.71512	0.686049	3.98818	-1.51182		0.813951	0		3.98821			517	0.5	1.5	2.62364	0.874544	1.76904	0.707616	4.39267	516.5	2.27306	0.757686	1.71512	0.686049	3.98818	-1.51182
518	0.866025	1.86603	3.46679	1.1556	2.03654	0.814615	5.50333	517.5	3.06859	1.02286	1.88842	0.755367	4.95701	-0.542991		1.11066	0		4.95705			518	0.866025	1.86603	3.4668	1.1556	2.03653	0.814615	5.50333	517.5	3.0686	1.02286	1.88841	0.755367	4.95701	-0.542991
519	1	2	4.18488	1.39496	2.42822	0.971287	6.6131	518.5	3.84575	1.28192	2.22559	0.890235	6.07133	0.571333		1.10977	0		6.07137			519	1	2	4.18488	1.39496	2.42821	0.971287	6.6131	518.5	3.84575	1.28191	2.22558	0.890235	6.07133	0.571333
520	0.866025	1.86603	4.58548	1.52849	2.83913	1.13565	7.42461	519.5	4.39628	1.46543	2.63628	1.05451	7.03257	1.53257		0.811512	0		7.0326			520	0.866025	1.86603	4.58548	1.52849	2.83913	1.13565	7.42461	519.5	4.39629	1.46543	2.63628	1.05451	7.03257	1.53257
521	0.5	1.5	4.56125	1.52042	3.15918	1.26367	7.72042	520.5	4.57269	1.52423	3.01046	1.20419	7.58315	2.08315		0.295815	0		7.58317			521	0.5	1.5	4.56125	1.52041	3.15917	1.26367	7.72042	520.5	4.5727	1.52423	3.01046	1.20419	7.58315	2.08315
522	2.84224e-14	1	4.11868	1.37289	3.3026	1.32104	7.42128	521.5	4.32769	1.44256	3.24787	1.29915	7.57556	2.07556		-0.299146	0		7.57556			522	2.84224e-14	1	4.11869	1.37289	3.30259	1.32104	7.42128	521.5	4.3277	1.44256	3.24786	1.29915	7.57556	2.07556
523	-0.5	0.5	3.37637	1.12546	3.23096	1.29238	6.60733	522.5	3.72694	1.24231	3.28488	1.31395	7.01182	1.51182		-0.813951	0		7.01181			523	-0.5	0.5	3.37638	1.12546	3.23095	1.29238	6.60733	522.5	3.72695	1.24231	3.28487	1.31395	7.01182	1.51182
524	-0.866025	0.133975	2.53321	0.844402	2.96346	1.18538	5.49667	523.5	2.93141	0.977136	3.11158	1.24463	6.04299	0.542991		-1.11066	0		6.04297			524	-0.866025	0.133975	2.53321	0.844403	2.96346	1.18538	5.49667	523.5	2.93142	0.977137	3.11157	1.24463	6.04299	0.542991
525	-1	0	1.81512	0.60504	2.57178	1.02871	4.3869	524.5	2.15425	0.718085	2.77441	1.10977	4.92867	-0.571333		-1.10977	-4.44089e-16		4.92865			525	-1	0	1.81513	0.605041	2.57178	1.02871	4.3869	524.5	2.15426	0.718085	2.77441	1.10977	4.92867	-0.571333
526	-0.866025	0.133975	1.41452	0.471508	2.16087	0.864347	3.57539	525.5	1.60372	0.534572	2.36372	0.945487	3.96743	-1.53257		-0.811512	5.55112e-16		3.96743			526	-0.866025	0.133975	1.41453	0.471509	2.16086	0.864347	3.57539	525.5	1.60372	0.534573	2.36371	0.945487	3.96743	-1.53257
527	-0.5	0.5	1.43875	0.479585	1.84082	0.736329	3.27958	526.5	1.42731	0.47577	1.98954	0.795815	3.41685	-2.08315		-0.295815	0		3.41686			527	-0.5	0.5	1.43876	0.479585	1.84082	0.736329	3.27958	526.5	1.42732	0.475771	1.98953	0.795814	3.41685	-2.08315
528	-3.9203e-14	1	1.88132	0.627106	1.6974	0.678962	3.57872	527.5	1.67231	0.557436	1.75213	0.700854	3.42444	-2.07556		0.299146	0		3.42446			528	-3.9203e-14	1	1.88132	0.627106	1.6974	0.678962	3.57872	527.5	1.67231	0.557436	1.75213	0.700854	3.42444	-2.07556
529	0.5	1.5	2.62363	0.874544	1.76904	0.707616	4.39267	528.5	2.27306	0.757686	1.71512	0.686049	3.98818	-1.51182		0.813951	0		3.98821			529	0.5	1.5	2.62364	0.874544	1.76904	0.707616	4.39267	528.5	2.27306	0.757686	1.71512	0.686049	3.98818	-1.51182
530	0.866025	1.86603	3.46679	1.1556	2.03654	0.814615	5.50333	529.5	3.06859	1.02286	1.88842	0.755367	4.95701	-0.542991		1.11066	0		4.95705			530	0.866025	1.86603	3.4668	1.1556	2.03653	0.814615	5.50333	529.5	3.0686	1.02286	1.88841	0.755367	4.95701	-0.542991
531	1	2	4.18488	1.39496	2.42822	0.971287	6.6131	530.5	3.84575	1.28192	2.22559	0.890235	6.07133	0.571333		1.10977	0		6.07137			531	1	2	4.18488	1.39496	2.42821	0.971287	6.6131	530.5	3.84575	1.28191	2.22558	0.890235	6.07133	0.571333
532	0.866025	1.86603	4.58548	1.52849	2.83913	1.13565	7.42461	531.5	4.39628	1.46543	2.63628	1.05451	7.03257	1.53257		0.811512	0		7.0326			532	0.866025	1.86603	4.58548	1.52849	2.83913	1.13565	7.42461	531.5	4.39629	1.46543	2.63628	1.05451	7.03257	1.53257
533	0.5	1.5	4.56125	1.52042	3.15918	1.26367	7.72042	532.5	4.57269	1.52423	3.01046	1.20419	7.58315	2.08315		0.295815	0		7.58317			533	0.5	1.5	4.56125	1.52041	3.15917	1.26367	7.72042	532.5	4.5727	1.52423	3.01046	1.20419	7.58315	2.08315
534	4.99837e-14	1	4.11868	1.37289	3.3026	1.32104	7.42128	533.5	4.32769	1.44256	3.24787	1.29915	7.57556	2.07556		-0.299146	0		7.57556			534	4.99837e-14	1	4.11869	1.37289	3.30259	1.32104	7.42128	533.5	4.3277	1.44256	3.24786	1.29915	7.57556	2.07556
535	-0.5	0.5	3.37637	1.12546	3.23096	1.29238	6.60733	534.5	3.72694	1.24231	3.28488	1.31395	7.01182	1.51182		-0.813951	0		7.01181			535	-0.5	0.5	3.37638	1.12546	3.23095	1.29238	6.60733	534.5	3.72695	1.24231	3.28487	1.31395	7.01182	1.51182
536	-0.866025	0.133975	2.53321	0.844402	2.96346	1.18538	5.49667	535.5	2.93141	0.977136	3.11158	1.24463	6.04299	0.542991		-1.11066	1.11022e-15		6.04297			536	-0.866025	0.133975	2.53321	0.844403	2.96346	1.18538	5.49667	535.5	2.93142	0.977137	3.11157	1.24463	6.04299	0.542991
537	-1	0	1.81512	0.60504	2.57178	1.02871	4.3869	536.5	2.15425	0.718085	2.77441	1.10977	4.92867	-0.571333		-1.10977	-6.66134e-16		4.92865			537	-1	0	1.81513	0.605041	2.57178	1.02871	4.3869	536.5	2.15426	0.718085	2.77441	1.10977	4.92867	-0.571333
538	-0.866025	0.133975	1.41452	0.471508	2.16087	0.864347	3.57539	537.5	1.60372	0.534572	2.36372	0.945487	3.96743	-1.53257		-0.811512	0		3.96743			538	-0.866025	0.133975	1.41453	0.471509	2.16086	0.864347	3.57539	537.5	1.60372	0.534573	2.36371	0.945487	3.96743	-1.53257
539	-0.5	0.5	1.43875	0.479585	1.84082	0.736329	3.27958	538.5	1.42731	0.47577	1.98954	0.795815	3.41685	-2.08315		-0.295815	0		3.41686			539	-0.5	0.5	1.43876	0.479585	1.84082	0.736329	3.27958	538.5	1.42732	0.475771	1.98953	0.795814	3.41685	-2.08315
540	-3.92091e-15	1	1.88132	0.627106	1.6974	0.678962	3.57872	539.5	1.67231	0.557436	1.75213	0.700854	3.42444	-2.07556		0.299146	0		3.42446			540	-3.92091e-15	1	1.88132	0.627106	1.6974	0.678962	3.57872	539.5	1.67231	0.557436	1.75213	0.700854	3.42444	-2.07556
541	0.5	1.5	2.62363	0.874544	1.76904	0.707616	4.39267	540.5	2.27306	0.757686	1.71512	0.686049	3.98818	-1.51182		0.813951	0		3.98821			541	0.5	1.5	2.62364	0.874544	1.76904	0.707616	4.39267	540.5	2.27306	0.757686	1.71512	0.686049	3.98818	-1.51182
542	0.866025	1.86603	3.46679	1.1556	2.03654	0.814615	5.50333	541.5	3.06859	1.02286	1.88842	0.755367	4.95701	-0.542991		1.11066	0		4.95705			542	0.866025	1.86603	3.4668	1.1556	2.03653	0.814615	5.50333	541.5	3.0686	1.02286	1.88841	0.755367	4.95701	-0.542991
543	1	2	4.18488	1.39496	2.42822	0.971287	6.6131	542.5	3.84575	1.28192	2.22559	0.890235	6.07133	0.571333		1.10977	0		6.07137			543	1	2	4.18488	1.39496	2.42821	0.971287	6.6131	542.5	3.84575	1.28191	2.22558	0.890235	6.07133	0.571333
544	0.866025	1.86603	4.58548	1.52849	2.83913	1.13565	7.42461	543.5	4.39628	1.46543	2.63628	1.05451	7.03257	1.53257		0.811512	0		7.0326			544	0.866025	1.86603	4.58548	1.52849	2.83913	1.13565	7.42461	543.5	4.39629	1.46543	2.63628	1.05451	7.03257	1.53257
545	0.5	1.5	4.56125	1.52042	3.15918	1.26367	7.72042	544.5	4.57269	1.52423	3.01046	1.20419	7.58315	2.08315		0.295815	0		7.58317			545	0.5	1.5	4.56125	1.52041	3.15917	1.26367	7.72042	544.5	4.5727	1.52423	3.01046	1.20419	7.58315	2.08315
546	1.47016e-14	1	4.11868	1.37289	3.3026	1.32104	7.42128	545.5	4.32769	1.44256	3.24787	1.29915	7.57556	2.07556		-0.299146	0		7.57556			546	1.47016e-14	1	4.11869	1.37289	3.30259	1.32104	7.42128	545.5	4.3277	1.44256	3.24786	1.29915	7.57556	2.07556
547	-0.5	0.5	3.37637	1.12546	3.23096	1.29238	6.60733	546.5	3.72694	1.24231	3.28488	1.31395	7.01182	1.51182		-0.813951	0		7.01181			547	-0.5	0.5	3.37638	1.12546	3.23095	1.29238	6.60733	546.5	3.72695	1.24231	3.28487	1.31395	7.01182	1.51182
548	-0.866025	0.133975	2.53321	0.844402	2.96346	1.18538	5.49667	547.5	2.93141	0.977136	3.11158	1.24463	6.04299	0.542991		-1.11066	-3.33067e-16		6.04297			548	-0.866025	0.133975	2.53321	0.844403	2.96346	1.18538	5.49667	547.5	2.93142	0.977137	3.11157	1.24463	6.04299	0.542991
549	-1	0	1.81512	0.60504	2.57178	1.02871	4.3869	548.5	2.15425	0.718085	2.77441	1.10977	4.92867	-0.571333		-1.10977	4.44089e-16		4.92865			549	-1	0	1.81513	0.605041	2.57178	1.02871	4.3869	548.5	2.15426	0.718085	2.77441	1.10977	4.92867	-0.571333
550	-0.866025	0.133975	1.41452	0.471508	2.16087	0.864347	3.57539	549.5	1.60372	0.534572	2.36372	0.945487	3.96743	-1.53257		-0.811512	2.22045e-16		3.96743			550	-0.866025	0.133975	1.41453	0.471509	2.16086	0.864347	3.57539	549.5	1.60372	0.534573	2.36371	0.945487	3.96743	-1.53257
551	-0.5	0.5	1.43875	0.479585	1.84082	0.736329	3.27958	550.5	1.42731	0.47577	1.98954	0.795815	3.41685	-2.08315		-0.295815	0		3.41686			551	-0.5	0.5	1.43876	0.479585	1.84082	0.736329	3.27958	550.5	1.42732	0.475771	1.98953	0.795814	3.41685	-2.08315
552	-2.54822e-14	1	1.88132	0.627106	1.6974	0.678962	3.57872	551.5	1.67231	0.557436	1.75213	0.700854	3.42444	-2.07556		0.299146	0		3.42446			552	-2.54822e-14	1	1.88132	0.627106	1.6974	0.678962	3.57872	551.5	1.67231	0.557436	1.75213	0.700854	3.42444	-2.07556
553	0.5	1.5	2.62363	0.874544	1.76904	0.707616	4.39267	552.5	2.27306	0.757686	1.71512	0.686049	3.98818	-1.51182		0.813951	0		3.98821			553	0.5	1.5	2.62364	0.874544	1.76904	0.707616	4.39267	552.5	2.27306	0.757686	1.71512	0.686049	3.98818	-1.51182
554	0.866025	1.86603	3.46679	1.1556	2.03654	0.814615	5.50333	553.5	3.06859	1.02286	1.88842	0.755367	4.95701	-0.542991		1.11066	0		4.95705			554	0.866025	1.86603	3.4668	1.1556	2.03653	0.814615	5.50333	553.5	3.0686	1.02286	1.88841	0.755367	4.95701	-0.542991
555	1	2	4.18488	1.39496	2.42822	0.971287	6.6131	554.5	3.84575	1.28192	2.22559	0.890235	6.07133	0.571333		1.10977	0		6.07137			555	1	2	4.18488	1.39496	2.42821	0.971287	6.6131	554.5	3.84575	1.28191	2.22558	0.890235	6.07133	0.571333
556	0.866025	1.86603	4.58548	1.52849	2.83913	1.13565	7.42461	555.5	4.39628	1.46543	2.63628	1.05451	7.03257	1.53257		0.811512	0		7.0326			556	0.866025	1.86603	4.58548	1.52849	2.83913	1.13565	7.42461	555.5	4.39629	1.46543	2.63628	1.05451	7.03257	1.53257
557	0.5	1.5	4.56125	1.52042	3.15918	1.26367	7.72042	556.5	4.57269	1.52423	3.01046	1.20419	7.58315	2.08315		0.295815	0		7.58317			557	0.5	1.5	4.56125	1.52041	3.15917	1.26367	7.72042	556.5	4.5727	1.52423	3.01046	1.20419	7.58315	2.08315
558	3.62629e-14	1	4.11868	1.37289	3.3026	1.32104	7.42128	557.5	4.32769	1.44256	3.24787	1.29915	7.57556	2.07556		-0.299146	0		7.57556			558	3.62629e-14	1	4.11869	1.37289	3.30259	1.32104	7.42128	557.5	4.3277	1.44256	3.24786	1.29915	7.57556	2.07556
559	-0.5	0.5	3.37637	1.12546	3.23096	1.29238	6.60733	558.5	3.72694	1.24231	3.28488	1.31395	7.01182	1.51182		-0.813951	0		7.01181			559	-0.5	0.5	3.37638	1.12546	3.23095	1.29238	6.60733	558.5	3.72695	1.24231	3.28487	1.31395	7.01182	1.51182
560	-0.866025	0.133975	2.53321	0.844402	2.96346	1.18538	5.49667	559.5	2.93141	0.977136	3.11158	1.24463	6.04299	0.542991		-1.11066	2.22045e-16		6.04297			560	-0.866025	0.133975	2.53321	0.844403	2.96346	1.18538	5.49667	559.5	2.93142	0.977137	3.11157	1.24463	6.04299	0.542991
561	-1	0	1.81512	0.60504	2.57178	1.02871	4.3869	560.5	2.15425	0.718085	2.77441	1.10977	4.92867	-0.571333		-1.10977	4.44089e-16		4.92865			561	-1	0	1.81513	0.605041	2.57178	1.02871	4.3869	560.5	2.15426	0.718085	2.77441	1.10977	4.92867	-0.571333
562	-0.866025	0.133975	1.41452	0.471508	2.16087	0.864347	3.57539	561.5	1.60372	0.534572	2.36372	0.945487	3.96743	-1.53257		-0.811512	0		3.96743			562	-0.866025	0.133975	1.41453	0.471509	2.16086	0.864347	3.57539	561.5	1.60372	0.534573	2.36371	0.945487	3.96743	-1.53257
563	-0.5	0.5	1.43875	0.479585	1.84082	0.736329	3.27958	562.5	1.42731	0.47577	1.98954	0.795815	3.41685	-2.08315		-0.295815	0		3.41686			563	-0.5	0.5	1.43876	0.479585	1.84082	0.736329	3.27958	562.5	1.42732	0.475771	1.98953	0.795814	3.41685	-2.08315
564	-4.70435e-14	1	1.88132	0.627106	1.6974	0.678962	3.57872	563.5	1.67231	0.557436	1.75213	0.700854	3.42444	-2.07556		0.299146	0		3.42446			564	-4.70435e-14	1	1.88132	0.627106	1.6974	0.678962	3.57872	563.5	1.67231	0.557436	1.75213	0.700854	3.42444	-2.07556
565	0.5	1.5	2.62363	0.874544	1.76904	0.707616	4.39267	564.5	2.27306	0.757686	1.71512	0.686049	3.98818	-1.51182		0.813951	0		3.98821			565	0.5	1.5	2.62364	0.874544	1.76904	0.707616	4.39267	564.5	2.27306	0.757686	1.71512	0.686049	3.98818	-1.51182
566	0.866025	1.86603	3.46679	1.1556	2.03654	0.814615	5.50333	565.5	3.06859	1.02286	1.88842	0.755367	4.95701	-0.542991		1.11066	0		4.95705			566	0.866025	1.86603	3.4668	1.1556	2.03653	0.814615	5.50333	565.5	3.0686	1.02286	1.88841	0.755367	4.95701	-0.542991
567	1	2	4.18488	1.39496	2.42822	0.971287	6.6131	566.5	3.84575	1.28192	2.22559	0.890235	6.07133	0.571333		1.10977	0		6.07137			567	1	2	4.18488	1.39496	2.42821	0.971287	6.6131	566.5	3.84575	1.28191	2.22558	0.890235	6.07133	0.571333
568	0.866025	1.86603	4.58548	1.52849	2.83913	1.13565	7.42461	567.5	4.39628	1.46543	2.63628	1.05451	7.03257	1.53257		0.811512	0		7.0326			568	0.866025	1.86603	4.58548	1.52849	2.83913	1.13565	7.42461	567.5	4.39629	1.46543	2.63628	1.05451	7.03257	1.53257
569	0.5	1.5	4.56125	1.52042	3.15918	1.26367	7.72042	568.5	4.57269	1.52423	3.01046	1.20419	7.58315	2.08315		0.295815	0		7.58317			569	0.5	1.5	4.56125	1.52041	3.15917	1.26367	7.72042	568.5	4.5727	1.52423	3.01046	1.20419	7.58315	2.08315
570	5.78242e-14	1	4.11868	1.37289	3.3026	1.32104	7.42128	569.5	4.32769	1.44256	3.24787	1.29915	7.57556	2.07556		-0.299146	0		7.57556			570	5.78242e-14	1	4.11869	1.37289	3.30259	1.32104	7.42128	569.5	4.3277	1.44256	3.24786	1.29915	7.57556	2.07556
571	-0.5	0.5	3.37637	1.12546	3.23096	1.29238	6.60733	570.5	3.72694	1.24231	3.28488	1.31395	7.01182	1.51182		-0.813951	0		7.01181			571	-0.5	0.5	3.37638	1.12546	3.23095	1.29238	6.60733	570.5	3.72695	1.24231	3.28487	1.31395	7.01182	1.51182
572	-0.866025	0.133975	2.53321	0.844402	2.96346	1.18538	5.49667	571.5	2.93141	0.977136	3.11158	1.24463	6.04299	0.542991		-1.11066	-3.33067e-16		6.04297			572	-0.866025	0.133975	2.53321	0.844403	2.96346	1.18538	5.49667	571.5	2.93142	0.977137	3.11157	1.24463	6.04299	0.542991
573	-1	0	1.81512	0.60504	2.57178	1.02871	4.3869	572.5	2.15425	0.718085	2.77441	1.10977	4.92867	-0.571333		-1.10977	2.22045e-16		4.92865			573	-1	0	1.81513	0.605041	2.57178	1.02871	4.3869	572.5	2.15426	0.718085	2.77441	1.10977	4.92867	-0.571333
574	-0.866025	0.133975	1.41452	0.471508	2.16087	0.864347	3.57539	573.5	1.60372	0.534572	2.36372	0.945487	3.96743	-1.53257		-0.811512	-3.33067e-16		3.96743			574	-0.866025	0.133975	1.41453	0.471509	2.16086	0.864347	3.57539	573.5	1.60372	0.534573	2.36371	0.945487	3.96743	-1.53257
575	-0.5	0.5	1.43875	0.479585	1.84082	0.736329	3.27958	574.5	1.42731	0.47577	1.98954	0.795815	3.41685	-2.08315		-0.295815	0		3.41686			575	-0.5	0.5	1.43876	0.479585	1.84082	0.736329	3.27958	574.5	1.42732	0.475771	1.98953	0.795814	3.41685	-2.08315
576	-1.17614e-14	1	1.88132	0.627106	1.6974	0.678962	3.57872	575.5	1.67231	0.557436	1.75213	0.700854	3.42444	-2.07556		0.299146	0		3.42446			576	-1.17614e-14	1	1.88132	0.627106	1.6974	0.678962	3.57872	575.5	1.67231	0.557436	1.75213	0.700854	3.42444	-2.07556
577	0.5	1.5	2.62363	0.874544	1.76904	0.707616	4.39267	576.5	2.27306	0.757686	1.71512	0.686049	3.98818	-1.51182		0.813951	0		3.98821			577	0.5	1.5	2.62364	0.874544	1.76904	0.707616	4.39267	576.5	2.27306	0.757686	1.71512	0.686049	3.98818	-1.51182
578	0.866025	1.86603	3.46679	1.1556	2.03654	0.814615	5.50333	577.5	3.06859	1.02286	1.88842	0.755367	4.95701	-0.542991		1.11066	0		4.95705			578	0.866025	1.86603	3.4668	1.1556	2.03653	0.814615	5.50333	577.5	3.0686	1.02286	1.88841	0.755367	4.95701	-0.542991
579	1	2	4.18488	1.39496	2.42822	0.971287	6.6131	578.5	3.84575	1.28192	2.22559	0.890235	6.07133	0.571333		1.10977	0		6.07137			579	1	2	4.18488	1.39496	2.42821	0.971287	6.6131	578.5	3.84575	1.28191	2.22558	0.890235	6.07133	0.571333
580	0.866025	1.86603	4.58548	1.52849	2.83913	1.13565	7.42461	579.5	4.39628	1.46543	2.63628	1.05451	7.03257	1.53257		0.811512	0		7.0326			580	0.866025	1.86603	4.58548	1.52849	2.83913	1.13565	7.42461	579.5	4.39629	1.46543	2.63628	1.05451	7.03257	1.53257
581	0.5	1.5	4.56125	1.52042	3.15918	1.26367	7.72042	580.5	4.57269	1.52423	3.01046	1.20419	7.58315	2.08315		0.295815	0		7.58317			581	0.5	1.5	4.56125	1.52041	3.15917	1.26367	7.72042	580.5	4.5727	1.52423	3.01046	1.20419	7.58315	2.08315
582	2.25421e-14	1	4.11868	1.37289	3.3026	1.32104	7.42128	581.5	4.32769	1.44256	3.24787	1.29915	7.57556	2.07556		-0.299146	0		7.57556			582	2.25421e-14	1	4.11869	1.37289	3.30259	1.32104	7.42128	581.5	4.3277	1.44256	3.24786	1.29915	7.57556	2.07556
583	-0.5	0.5	3.37637	1.12546	3.23096	1.29238	6.60733	582.5	3.72694	1.24231	3.28488	1.31395	7.01182	1.51182		-0.813951	0		7.01181			583	-0.5	0.5	3.37638	1.12546	3.23095	1.29238	6.60733	582.5	3.72695	1.24231	3.28487	1.31395	7.01182	1.51182
584	-0.866025	0.133975	2.53321	0.844402	2.96346	1.18538	5.49667	583.5	2.93141	0.977136	3.11158	1.24463	6.04299	0.542991		-1.11066	0		6.04297			584	-0.866025	0.133975	2.53321	0.844403	2.96346	1.18538	5.49667	583.5	2.93142	0.977137	3.11157	1.24463	6.04299	0.542991
585	-1	0	1.81512	0.60504	2.57178	1.02871	4.3869	584.5	2.15425	0.718085	2.77441	1.10977	4.92867	-0.571333		-1.10977	0		4.92865			585	-1	0	1.81513	0.605041	2.57178	1.02871	4.3869	584.5	2.15426	0.718085	2.77441	1.10977	4.92867	-0.571333
586	-0.866025	0.133975	1.41452	0.471508	2.16087	0.864347	3.57539	585.5	1.60372	0.534572	2.36372	0.945487	3.96743	-1.53257		-0.811512	6.66134e-16		3.96743			586	-0.866025	0.133975	1.41453	0.471509	2.16086	0.864347	3.57539	585.5	1.60372	0.534573	2.36371	0.945487	3.96743	-1.53257
587	-0.5	0.5	1.43875	0.479585	1.84082	0.736329	3.27958	586.5	1.42731	0.47577	1.98954	0.795815	3.41685	-2.08315		-0.295815	0		3.41686			587	-0.5	0.5	1.43876	0.479585	1.84082	0.736329	3.27958	586.5	1.42732	0.475771	1.98953	0.795814	3.41685	-2.08315
588	-3.33227e-14	1	1.88132	0.627106	1.6974	0.678962	3.57872	587.5	1.67231	0.557436	1.75213	0.700854	3.42444	-2.07556		0.299146	0		3.42446			588	-3.33227e-14	1	1.88132	0.627106	1.6974	0.678962	3.57872	587.5	1.67231	0.557436	1.75213	0.700854	3.42444	-2.07556
589	0.5	1.5	2.62363	0.874544	1.76904	0.707616	4.39267	588.5	2.27306	0.757686	1.71512	0.686049	3.98818	-1.51182		0.813951	0		3.98821			589	0.5	1.5	2.62364	0.874544	1.76904	0.707616	4.39267	588.5	2.27306	0.757686	1.71512	0.686049	3.98818	-1.51182
590	0.866025	1.86603	3.46679	1.1556	2.03654	0.814615	5.50333	589.5	3.06859	1.02286	1.88842	0.755367	4.95701	-0.542991		1.11066	0		4.95705			590	0.866025	1.86603	3.4668	1.1556	2.03653	0.814615	5.50333	589.5	3.0686	1.02286	1.88841	0.755367	4.95701	-0.542991
591	1	2	4.18488	1.39496	2.42822	0.971287	6.6131	590.5	3.84575	1.28192	2.22559	0.890235	6.07133	0.571333		1.10977	0		6.07137			591	1	2	4.18488	1.39496	2.42821	0.971287	6.6131	590.5	3.84575	1.28191	2.22558	0.890235	6.07133	0.571333
592	0.866025	1.86603	4.58548	1.52849	2.83913	1.13565	7.42461	591.5	4.39628	1.46543	2.63628	1.05451	7.03257	1.53257		0.811512	0		7.0326			592	0.866025	1.86603	4.58548	1.52849	2.83913	1.13565	7.42461	591.5	4.39629	1.46543	2.63628	1.05451	7.03257	1.53257
593	0.5	1.5	4.56125	1.52042	3.15918	1.26367	7.72042	592.5	4.57269	1.52423	3.01046	1.20419	7.58315	2.08315		0.295815	0		7.58317			593	0.5	1.5	4.56125	1.52041	3.15917	1.26367	7.72042	592.5	4.5727	1.52423	3.01046	1.20419	7.58315	2.08315
594	4.41034e-14	1	4.11868	1.37289	3.3026	1.32104	7.42128	593.5	4.32769	1.44256	3.24787	1.29915	7.57556	2.07556		-0.299146	0		7.57556			594	4.41034e-14	1	4.11869	1.37289	3.30259	1.32104	7.42128	593.5	4.3277	1.44256	3.24786	1.29915	7.57556	2.07556
595	-0.5	0.5	3.37637	1.12546	3.23096	1.29238	6.60733	594.5	3.72694	1.24231	3.28488	1.31395	7.01182	1.51182		-0.813951	0		7.01181			595	-0.5	0.5	3.37638	1.12546	3.23095	1.29238	6.60733	594.5	3.72695	1.24231	3.28487	1.31395	7.01182	1.51182
596	-0.866025	0.133975	2.53321	0.844402	2.96346	1.18538	5.49667	595.5	2.93141	0.977136	3.11158	1.24463	6.04299	0.542991		-1.11066	2.22045e-16		6.04297			596	-0.866025	0.133975	2.53321	0.844403	2.96346	1.18538	5.49667	595.5	2.93142	0.977137	3.11157	1.24463	6.04299	0.542991
597	-1	0	1.81512	0.60504	2.57178	1.02871	4.3869	596.5	2.15425	0.718085	2.77441	1.10977	4.92867	-0.571333		-1.10977	4.44089e-16		4.92865			597	-1	0	1.81513	0.605041	2.57178	1.02871	4.3869	596.5	2.15426	0.718085	2.77441	1.10977	4.92867	-0.571333
598	-0.866025	0.133975	1.41452	0.471508	2.16087	0.864347	3.57539	597.5	1.60372	0.534572	2.36372	0.945487	3.96743	-1.53257		-0.811512	0		3.96743			598	-0.866025	0.133975	1.41453	0.471509	2.16086	0.864347	3.57539	597.5	1.60372	0.534573	2.36371	0.945487	3.96743	-1.53257
599	-0.5	0.5	1.43875	0.479585	1.84082	0.736329	3.27958	598.5	1.42731	0.47577	1.98954	0.795815	3.41685	-2.08315		-0.295815	0		3.41686			599	-0.5	0.5	1.43876	0.479585	1.84082	0.736329	3.27958	598.5	1.42732	0.475771	1.98953	0.795814	3.41685	-2.08315
600	-5.4884e-14	1	1.88132	0.627106	1.6974	0.678962	3.57872	599.5	1.67231	0.557436	1.75213	0.700854	3.42444	-2.07556		0.299146	0		3.42446			600	-5.4884e-14	1	1.88132	0.627106	1.6974	0.678962	3.57872	599.5	1.67231	0.557436	1.75213	0.700854	3.42444	-2.07556
601	0.5	1.5	2.62363	0.874544	1.76904	0.707616	4.39267	600.5	2.27306	0.757686	1.71512	0.686049	3.98818	-1.51182		0.813951	0		3.98821			601	0.5	1.5	2.62364	0.874544	1.76904	0.707616	4.39267	600.5	2.27306	0.757686	1.71512	0.686049	3.98818	-1.51182
602	0.866025	1.86603	3.46679	1.1556	2.03654	0.814615	5.50333	601.5	3.06859	1.02286	1.88842	0.755367	4.95701	-0.542991		1.11066	0		4.95705			602	0.866025	1.86603	3.4668	1.1556	2.03653	0.814615	5.50333	601.5	3.0686	1.02286	1.88841	0.755367	4.95701	-0.542991
603	1	2	4.18488	1.39496	2.42822	0.971287	6.6131	602.5	3.84575	1.28192	2.22559	0.890235	6.07133	0.571333		1.10977	0		6.07137			603	1	2	4.18488	1.39496	2.42821	0.971287	6.6131	602.5	3.84575	1.28191	2.22558	0.890235	6.07133	0.571333
604	0.866025	1.86603	4.58548	1.52849	2.83913	1.13565	7.42461	603.5	4.39628	1.46543	2.63628	1.05451	7.03257	1.53257		0.811512	0		7.0326			604	0.866025	1.86603	4.58548	1.52849	2.83913	1.13565	7.42461	603.5	4.39629	1.46543	2.63628	1.05451	7.03257	1.53257
605	0.5	1.5	4.56125	1.52042	3.15918	1.26367	7.72042	604.5	4.57269	1.52423	3.01046	1.20419	7.58315	2.08315		0.295815	0		7.58317			605	0.5	1.5	4.56125	1.52041	3.15917	1.26367	7.72042	604.5	4.5727	1.52423	3.01046	1.20419	7.58315	2.08315
606	8.82129e-15	1	4.11868	1.37289	3.3026	1.32104	7.42128	605.5	4.32769	1.44256	3.24787	1.29915	7.57556	2.07556		-0.299146	0		7.57556			606	8.82129e-15	1	4.11869	1.37289	3.30259	1.32104	7.42128	605.5	4.3277	1.44256	3.24786	1.29915	7.57556	2.07556
607	-0.5	0.5	3.37637	1.12546	3.23096	1.29238	6.60733	606.5	3.72694	1.24231	3.28488	1.31395	7.01182	1.51182		-0.813951	0		7.01181			607	-0.5	0.5	3.37638	1.12546	3.23095	1.29238	6.60733	606.5	3.72695	1.24231	3.28487	1.31395	7.01182	1.51182
608	-0.866025	0.133975	2.53321	0.844402	2.96346	1.18538	5.49667	607.5	2.93141	0.977136	3.11158	1.24463	6.04299	0.542991		-1.11066	0		6.04297			608	-0.866025	0.133975	2.53321	0.844403	2.96346	1.18538	5.49667	607.5	2.93142	0.977137	3.11157	1.24463	6.04299	0.542991
609	-1	0	1.81512	0.60504	2.57178	1.02871	4.3869	608.5	2.15425	0.718085	2.77441	1.10977	4.92867	-0.571333		-1.10977	-2.22045e-16		4.92865			609	-1	0	1.81513	0.605041	2.57178	1.02871	4.3869	608.5	2.15426	0.718085	2.77441	1.10977	4.92867	-0.571333
610	-0.866025	0.133975	1.41452	0.471508	2.16087	0.864347	3.57539	609.5	1.60372	0.534572	2.36372	0.945487	3.96743	-1.53257		-0.811512	5.55112e-16		3.96743			610	-0.866025	0.133975	1.41453	0.471509	2.16086	0.864347	3.57539	609.5	1.60372	0.534573	2.36371	0.945487	3.96743	-1.53257
611	-0.5	0.5	1.43875	0.479585	1.84082	0.736329	3.27958	610.5	1.42731	0.47577	1.98954	0.795815	3.41685	-2.08315		-0.295815	-7.77156e-16		3.41686			611	-0.5	0.5	1.43876	0.479585	1.84082	0.736329	3.27958	610.5	1.42732	0.475771	1.98953	0.795814	3.41685	-2.08315
612	-1.96019e-14	1	1.88132	0.627106	1.6974	0.678962	3.57872	611.5	1.67231	0.557436	1.75213	0.700854	3.42444	-2.07556		0.299146	0		3.42446			612	-1.96019e-14	1	1.88132	0.627106	1.6974	0.678962	3.57872	611.5	1.67231	0.557436	1.75213	0.700854	3.42444	-2.07556
613	0.5	1.5	2.62363	0.874544	1.76904	0.707616	4.39267	612.5	2.27306	0.757686	1.71512	0.686049	3.98818	-1.51182		0.813951	0		3.98821			613	0.5	1.5	2.62364	0.874544	1.76904	0.707616	4.39267	612.5	2.27306	0.757686	1.71512	0.686049	3.98818	-1.51182
614	0.866025	1.86603	3.46679	1.1556	2.03654	0.814615	5.50333	613.5	3.06859	1.02286	1.88842	0.755367	4.95701	-0.542991		1.11066	0		4.95705			614	0.866025	1.86603	3.4668	1.1556	2.03653	0.814615	5.50333	613.5	3.0686	1.02286	1.88841	0.755367	4.95701	-0.542991
615	1	2	4.18488	1.39496	2.42822	0.971287	6.6131	614.5	3.84575	1.28192	2.22559	0.890235	6.07133	0.571333		1.10977	0		6.07137			615	1	2	4.18488	1.39496	2.42821	0.971287	6.6131	614.5	3.84575	1.28191	2.22558	0.890235	6.07133	0.571333
616	0.866025	1.86603	4.58548	1.52849	2.83913	1.13565	7.42461	615.5	4.39628	1.46543	2.63628	1.05451	7.03257	1.53257		0.811512	0		7.0326			616	0.866025	1.86603	4.58548	1.52849	2.83913	1.13565	7.42461	615.5	4.39629	1.46543	2.63628	1.05451	7.03257	1.53257
617	0.5	1.5	4.56125	1.52042	3.15918	1.26367	7.72042	616.5	4.57269	1.52423	3.01046	1.20419	7.58315	2.08315		0.295815	0		7.58317			617	0.5	1.5	4.56125	1.52041	3.15917	1.26367	7.72042	616.5	4.5727	1.52423	3.01046	1.20419	7.58315	2.08315
618	3.03826e-14	1	4.11868	1.37289	3.3026	1.32104	7.42128	617.5	4.32769	1.44256	3.24787	1.29915	7.57556	2.07556		-0.299146	0		7.57556			618	3.03826e-14	1	4.11869	1.37289	3.30259	1.32104	7.42128	617.5	4.3277	1.44256	3.24786	1.29915	7.57556	2.07556
619	-0.5	0.5	3.37637	1.12546	3.23096	1.29238	6.60733	618.5	3.72694	1.24231	3.28488	1.31395	7.01182	1.51182		-0.813951	0		7.01181			619	-0.5	0.5	3.37638	1.12546	3.23095	1.29238	6.60733	618.5	3.72695	1.24231	3.28487	1.31395	7.01182	1.51182
620	-0.866025	0.133975	2.53321	0.844402	2.96346	1.18538	5.49667	619.5	2.93141	0.977136	3.11158	1.24463	6.04299	0.542991		-1.11066	0		6.04297			620	-0.866025	0.133975	2.53321	0.844403	2.96346	1.18538	5.49667	619.5	2.93142	0.977137	3.11157	1.24463	6.04299	0.542991
621	-1	0	1.81512	0.60504	2.57178	1.02871	4.3869	620.5	2.15425	0.718085	2.77441	1.10977	4.92867	-0.571333		-1.10977	-1.11022e-15		4.92865			621	-1	0	1.81513	0.605041	2.57178	1.02871	4.3869	620.5	2.15426	0.718085	2.77441	1.10977	4.92867	-0.571333
622	-0.866025	0.133975	1.41452	0.471508	2.16087	0.864347	3.57539	621.5	1.60372	0.534572	2.36372	0.945487	3.96743	-1.53257		-0.811512	4.44089e-16		3.96743			622	-0.866025	0.133975	1.41453	0.471509	2.16086	0.864347	3.57539	621.5	1.60372	0.534573	2.36371	0.945487	3.96743	-1.53257
623	-0.5	0.5	1.43875	0.479585	1.84082	0.736329	3.27958	622.5	1.42731	0.47577	1.98954	0.795815	3.41685	-2.08315		-0.295815	0		3.41686			623	-0.5	0.5	1.43876	0.479585	1.84082	0.736329	3.27958	622.5	1.42732	0.475771	1.98953	0.795814	3.41685	-2.08315
624	-4.11633e-14	1	1.88132	0.627106	1.6974	0.678962	3.57872	623.5	1.67231	0.557436	1.75213	0.700854	3.42444	-2.07556		0.299146	0		3.42446			624	-4.11633e-14	1	1.88132	0.627106	1.6974	0.678962	3.57872	623.5	1.67231	0.557436	1.75213	0.700854	3.42444	-2.07556
625	0.5	1.5	2.62363	0.874544	1.76904	0.707616	4.39267	624.5	2.27306	0.757686	1.71512	0.686049	3.98818	-1.51182		0.813951	0		3.98821			625	0.5	1.5	2.62364	0.874544	1.76904	0.707616	4.39267	624.5	2.27306	0.757686	1.71512	0.686049	3.98818	-1.51182
626	0.866025	1.86603	3.46679	1.1556	2.03654	0.814615	5.50333	625.5	3.06859	1.02286	1.88842	0.755367	4.95701	-0.542991		1.11066	0		4.95705			626	0.866025	1.86603	3.4668	1.1556	2.03653	0.814615	5.50333	625.5	3.0686	1.02286	1.88841	0.755367	4.95701	-0.542991
627	1	2	4.18488	1.39496	2.42822	0.971287	6.6131	626.5	3.84575	1.28192	2.22559	0.890235	6.07133	0.571333		1.10977	0		6.07137			627	1	2	4.18488	1.39496	2.42821	0.971287	6.6131	626.5	3.84575	1.28191	2.22558	0.890235	6.07133	0.571333
628	0.866025	1.86603	4.58548	1.52849	2.83913	1.13565	7.42461	627.5	4.39628	1.46543	2.63628	1.05451	7.03257	1.53257		0.811512	0		7.0326			628	0.866025	1.86603	4.58548	1.52849	2.83913	1.13565	7.42461	627.5	4.39629	1.46543	2.63628	1.05451	7.03257	1.53257
629	0.5	1.5	4.56125	1.52042	3.15918	1.26367	7.72042	628.5	4.57269	1.52423	3.01046	1.20419	7.58315	2.08315		0.295815	0		7.58317			629	0.5	1.5	4.56125	1.52041	3.15917	1.26367	7.72042	628.5	4.5727	1.52423	3.01046	1.20419	7.58315	2.08315
630	5.19439e-14	1	4.11868	1.37289	3.3026	1.32104	7.42128	629.5	4.32769	1.44256	3.24787	1.29915	7.57556	2.07556		-0.299146	0		7.57556			630	5.19439e-14	1	4.11869	1.37289	3.30259	1.32104	7.42128	629.5	4.3277	1.44256	3.24786	1.29915	7.57556	2.07556
631	-0.5	0.5	3.37637	1.12546	3.23096	1.29238	6.60733	630.5	3.72694	1.24231	3.28488	1.31395	7.01182	1.51182		-0.813951	0		7.01181			631	-0.5	0.5	3.37638	1.12546	3.23095	1.29238	6.60733	630.5	3.72695	1.24231	3.28487	1.31395	7.01182	1.51182
632	-0.866025	0.133975	2.53321	0.844402	2.96346	1.18538	5.49667	631.5	2.93141	0.977136	3.11158	1.24463	6.04299	0.542991		-1.11066	7.77156e-16		6.04297			632	-0.866025	0.133975	2.53321	0.844403	2.96346	1.18538	5.49667	631.5	2.93142	0.977137	3.11157	1.24463	6.04299	0.542991
633	-1	0	1.81512	0.60504	2.57178	1.02871	4.3869	632.5	2.15425	0.718085	2.77441	1.10977	4.92867	-0.571333		-1.10977	0		4.92865			633	-1	0	1.81513	0.605041	2.57178	1.02871	4.3869	632.5	2.15426	0.718085	2.77441	1.10977	4.92867	-0.571333
634	-0.866025	0.133975	1.41452	0.471508	2.16087	0.864347	3.57539	633.5	1.60372	0.534572	2.36372	0.945487	3.96743	-1.53257		-0.811512	-5.55112e-16		3.96743			634	-0.866025	0.133975	1.41453	0.471509	2.16086	0.864347	3.57539	633.5	1.60372	0.534573	2.36371	0.945487	3.96743	-1.53257
635	-0.5	0.5	1.43875	0.479585	1.84082	0.736329	3.27958	634.5	1.42731	0.47577	1.98954	0.795815	3.41685	-2.08315		-0.295815	0		3.41686			635	-0.5	0.5	1.43876	0.479585	1.84082	0.736329	3.27958	634.5	1.42732	0.475771	1.98953	0.795814	3.41685	-2.08315
636	-6.27246e-14	1	1.88132	0.627106	1.6974	0.678962	3.57872	635.5	1.67231	0.557436	1.75213	0.700854	3.42444	-2.07556		0.299146	0		3.42446			636	-6.27246e-14	1	1.88132	0.627106	1.6974	0.678962	3.57872	635.5	1.67231	0.557436	1.75213	0.700854	3.42444	-2.07556
637	0.5	1.5	2.62363	0.874544	1.76904	0.707616	4.39267	636.5	2.27306	0.757686	1.71512	0.686049	3.98818	-1.51182		0.813951	0		3.98821			637	0.5	1.5	2.62364	0.874544	1.76904	0.707616	4.39267	636.5	2.27306	0.757686	1.71512	0.686049	3.98818	-1.51182
638	0.866025	1.86603	3.46679	1.1556	2.03654	0.814615	5.50333	637.5	3.06859	1.02286	1.88842	0.755367	4.95701	-0.542991		1.11066	0		4.95705			638	0.866025	1.86603	3.4668	1.1556	2.03653	0.814615	5.50333	637.5	3.0686	1.02286	1.88841	0.755367	4.95701	-0.542991
639	1	2	4.18488	1.39496	2.42822	0.971287	6.6131	638.5	3.84575	1.28192	2.22559	0.890235	6.07133	0.571333		1.10977	0		6.07137			639	1	2	4.18488	1.39496	2.42821	0.971287	6.6131	638.5	3.84575	1.28191	2.22558	0.890235	6.07133	0.571333
640	0.866025	1.86603	4.58548	1.52849	2.83913	1.13565	7.42461	639.5	4.39628	1.46543	2.63628	1.05451	7.03257	1.53257		0.811512	0		7.0326			640	0.866025	1.86603	4.58548	1.52849	2.83913	1.13565	7.42461	639.5	4.39629	1.46543	2.63628	1.05451	7.03257	1.53257
641	0.5	1.5	4.56125	1.52042	3.15918	1.26367	7.72042	640.5	4.57269	1.52423	3.01046	1.20419	7.58315	2.08315		0.295815	0		7.58317			641	0.5	1.5	4.56125	1.52041	3.15917	1.26367	7.72042	640.5	4.5727	1.52423	3.01046	1.20419	7.58315	2.08315
642	1.66618e-14	1	4.11868	1.37289	3.3026	1.32104	7.42128	641.5	4.32769	1.44256	3.24787	1.29915	7.57556	2.07556		-0.299146	0		7.57556			642	1.66618e-14	1	4.11869	1.37289	3.30259	1.32104	7.42128	641.5	4.3277	1.44256	3.24786	1.29915	7.57556	2.07556
643	-0.5	0.5	3.37637	1.12546	3.23096	1.29238	6.60733	642.5	3.72694	1.24231	3.28488	1.31395	7.01182	1.51182		-0.813951	8.88178e-16		7.01181			643	-0.5	0.5	3.37638	1.12546	3.23095	1.29238	6.60733	642.5	3.72695	1.24231	3.28487	1.31395	7.01182	1.51182
644	-0.866025	0.133975	2.53321	0.844402	2.96346	1.18538	5.49667	643.5	2.93141	0.977136	3.11158	1.24463	6.04299	0.542991		-1.11066	-2.22045e-16		6.04297			644	-0.866025	0.133975	2.53321	0.844403	2.96346	1.18538	5.49667	643.5	2.93142	0.977137	3.11157	1.24463	6.04299	0.542991
645	-1	0	1.81512	0.60504	2.57178	1.02871	4.3869	644.5	2.15425	0.718085	2.77441	1.10977	4.92867	-0.571333		-1.10977	0		4.92865			645	-1	0	1.81513	0.605041	2.57178	1.02871	4.3869	644.5	2.15426	0.718085	2.77441	1.10977	4.92867	-0.571333
646	-0.866025	0.133975	1.41452	0.471508	2.16087	0.864347	3.57539	645.5	1.60372	0.534572	2.36372	0.945487	3.96743	-1.53257		-0.811512	0		3.96743			646	-0.866025	0.133975	1.41453	0.471509	2.16086	0.864347	3.57539	645.5	1.60372	0.534573	2.36371	0.945487	3.96743	-1.53257
647	-0.5	0.5	1.43875	0.479585	1.84082	0.736329	3.27958	646.5	1.42731	0.47577	1.98954	0.795815	3.41685	-2.08315		-0.295815	0		3.41686			647	-0.5	0.5	1.43876	0.479585	1.84082	0.736329	3.27958	646.5	1.42732	0.475771	1.98953	0.795814	3.41685	-2.08315
648	-2.74425e-14	1	1.88132	0.627106	1.6974	0.678962	3.57872	647.5	1.67231	0.557436	1.75213	0.700854	3.42444	-2.07556		0.299146	0		3.42446			648	-2.74425e-14	1	1.88132	0.627106	1.6974	0.678962	3.57872	647.5	1.67231	0.557436	1.75213	0.700854	3.42444	-2.07556
649	0.5	1.5	2.62363	0.874544	1.76904	0.707616	4.39267	648.5	2.27306	0.757686	1.71512	0.686049	3.98818	-1.51182		0.813951	0		3.98821			649	0.5	1.5	2.62364	0.874544	1.76904	0.707616	4.39267	648.5	2.27306	0.757686	1.71512	0.686049	3.98818	-1.51182
650	0.866025	1.86603	3.46679	1.1556	2.03654	0.814615	5.50333	649.5	3.06859	1.02286	1.88842	0.755367	4.95701	-0.542991		1.11066	0		4.95705			650	0.866025	1.86603	3.4668	1.1556	2.03653	0.814615	5.50333	649.5	3.0686	1.02286	1.88841	0.755367	4.95701	-0.542991
651	1	2	4.18488	1.39496	2.42822	0.971287	6.6131	650.5	3.84575	1.28192	2.22559	0.890235	6.07133	0.571333		1.10977	0		6.07137			651	1	2	4.18488	1.39496	2.42821	0.971287	6.6131	650.5	3.84575	1.28191	2.22558	0.890235	6.07133	0.571333
652	0.866025	1.86603	4.58548	1.52849	2.83913	1.13565	7.42461	651.5	4.39628	1.46543	2.63628	1.05451	7.03257	1.53257		0.811512	0		7.0326			652	0.866025	1.86603	4.58548	1.52849	2.83913	1.13565	7.42461	651.5	4.39629	1.46543	2.63628	1.05451	7.03257	1.53257
653	0.5	1.5	4.56125	1.52042	3.15918	1.26367	7.72042	652.5	4.57269	1.52423	3.01046	1.20419	7.58315	2.08315		0.295815	0		7.58317			653	0.5	1.5	4.56125	1.52041	3.15917	1.26367	7.72042	652.5	4.5727	1.52423	3.01046	1.20419	7.58315	2.08315
654	3.82231e-14	1	4.11868	1.37289	3.3026	1.32104	7.42128	653.5	4.32769	1.44256	3.24787	1.29915	7.57556	2.07556		-0.299146	0		7.57556			654	3.82231e-14	1	4.11869	1.37289	3.30259	1.32104	7.42128	653.5	4.3277	1.44256	3.24786	1.29915	7.57556	2.07556
655	-0.5	0.5	3.37637	1.12546	3.23096	1.29238	6.60733	654.5	3.72694	1.24231	3.28488	1.31395	7.01182	1.51182		-0.813951	-1.33227e-15		7.01181			655	-0.5	0.5	3.37638	1.12546	3.23095	1.29238	6.60733	654.5	3.72695	1.24231	3.28487	1.31395	7.01182	1.51182
656	-0.866025	0.133975	2.53321	0.844402	2.96346	1.18538	5.49667	655.5	2.93141	0.977136	3.11158	1.24463	6.04299	0.542991		-1.11066	0		6.04297			656	-0.866025	0.133975	2.53321	0.844403	2.96346	1.18538	5.49667	655.5	2.93142	0.977137	3.11157	1.24463	6.04299	0.542991
657	-1	0	1.81512	0.60504	2.57178	1.02871	4.3869	656.5	2.15425	0.718085	2.77441	1.10977	4.92867	-0.571333		-1.10977	6.66134e-16		4.92865			657	-1	0	1.81513	0.605041	2.57178	1.02871	4.3869	656.5	2.15426	0.718085	2.77441	1.10977	4.92867	-0.571333
658	-0.866025	0.133975	1.41452	0.471508	2.16087	0.864347	3.57539	657.5	1.60372	0.534572	2.36372	0.945487	3.96743	-1.53257		-0.811512	-8.88178e-16		3.96743			658	-0.866025	0.133975	1.41453	0.471509	2.16086	0.864347	3.57539	657.5	1.60372	0.534573	2.36371	0.945487	3.96743	-1.53257
659	-0.5	0.5	1.43875	0.479585	1.84082	0.736329	3.27958	658.5	1.42731	0.47577	1.98954	0.795815	3.41685	-2.08315		-0.295815	0		3.41686			659	-0.5	0.5	1.43876	0.479585	1.84082	0.736329	3.27958	658.5	1.42732	0.475771	1.98953	0.795814	3.41685	-2.08315
660	-4.90038e-14	1	1.88132	0.627106	1.6974	0.678962	3.57872	659.5	1.67231	0.557436	1.75213	0.700854	3.42444	-2.07556		0.299146	0		3.42446			660	-4.90038e-14	1	1.88132	0.627106	1.6974	0.678962	3.57872	659.5	1.67231	0.557436	1.75213	0.700854	3.42444	-2.07556
661	0.5	1.5	2.62363	0.874544	1.76904	0.707616	4.39267	660.5	2.27306	0.757686	1.71512	0.686049	3.98818	-1.51182		0.813951	0		3.98821			661	0.5	1.5	2.62364	0.874544	1.76904	0.707616	4.39267	660.5	2.27306	0.757686	1.71512	0.686049	3.98818	-1.51182
662	0.866025	1.86603	3.46679	1.1556	2.03654	0.814615	5.50333	661.5	3.06859	1.02286	1.88842	0.755367	4.95701	-0.542991		1.11066	0		4.95705			662	0.866025	1.86603	3.4668	1.1556	2.03653	0.814615	5.50333	661.5	3.0686	1.02286	1.88841	0.755367	4.95701	-0.542991
663	1	2	4.18488	1.39496	2.42822	0.971287	6.6131	662.5	3.84575	1.28192	2.22559	0.890235	6.07133	0.571333		1.10977	0		6.07137			663	1	2	4.18488	1.39496	2.42821	0.971287	6.6131	662.5	3.84575	1.28191	2.22558	0.890235	6.07133	0.571333
664	0.866025	1.86603	4.58548	1.52849	2.83913	1.13565	7.42461	663.5	4.39628	1.46543	2.63628	1.05451	7.03257	1.53257		0.811512	0		7.0326			664	0.866025	1.86603	4.58548	1.52849	2.83913	1.13565	7.42461	663.5	4.39629	1.46543	2.63628	1.05451	7.03257	1.53257
665	0.5	1.5	4.56125	1.52042	3.15918	1.26367	7.72042	664.5	4.57269	1.52423	3.01046	1.20419	7.58315	2.08315		0.295815	0		7.58317			665	0.5	1.5	4.56125	1.52041	3.15917	1.26367	7.72042	664.5	4.5727	1.52423	3.01046	1.20419	7.58315	2.08315
666	5.97844e-14	1	4.11868	1.37289	3.3026	1.32104	7.42128	665.5	4.32769	1.44256	3.24787	1.29915	7.57556	2.07556		-0.299146	0		7.57556			666	5.97844e-14	1	4.11869	1.37289	3.30259	1.32104	7.42128	665.5	4.3277	1.44256	3.24786	1.29915	7.57556	2.07556
667	-0.5	0.5	3.37637	1.12546	3.23096	1.29238	6.60733	666.5	3.72694	1.24231	3.28488	1.31395	7.01182	1.51182		-0.813951	0		7.01181			667	-0.5	0.5	3.37638	1.12546	3.23095	1.29238	6.60733	666.5	3.72695	1.24231	3.28487	1.31395	7.01182	1.51182
668	-0.866025	0.133975	2.53321	0.844402	2.96346	1.18538	5.49667	667.5	2.93141	0.977136	3.11158	1.24463	6.04299	0.542991		-1.11066	2.22045e-16		6.04297			668	-0.866025	0.133975	2.53321	0.844403	2.96346	1.18538	5.49667	667.5	2.93142	0.977137	3.11157	1.24463	6.04299	0.542991
669	-1	0	1.81512	0.60504	2.57178	1.02871	4.3869	668.5	2.15425	0.718085	2.77441	1.10977	4.92867	-0.571333		-1.10977	-2.22045e-16		4.92865			669	-1	0	1.81513	0.605041	2.57178	1.02871	4.3869	668.5	2.15426	0.718085	2.77441	1.10977	4.92867	-0.571333
670	-0.866025	0.133975	1.41452	0.471508	2.16087	0.864347	3.57539	669.5	1.60372	0.534572	2.36372	0.945487	3.96743	-1.53257		-0.811512	0		3.96743			670	-0.866025	0.133975	1.41453	0.471509	2.16086	0.864347	3.57539	669.5	1.60372	0.534573	2.36371	0.945487	3.96743	-1.53257
671	-0.5	0.5	1.43875	0.479585	1.84082	0.736329	3.27958	670.5	1.42731	0.47577	1.98954	0.795815	3.41685	-2.08315		-0.295815	0		3.41686			671	-0.5	0.5	1.43876	0.479585	1.84082	0.736329	3.27958	670.5	1.42732	0.475771	1.98953	0.795814	3.41685	-2.08315
672	-1.37217e-14	1	1.88132	0.627106	1.6974	0.678962	3.57872	671.5	1.67231	0.557436	1.75213	0.700854	3.42444	-2.07556		0.299146	0		3.42446			672	-1.37217e-14	1	1.88132	0.627106	1.6974	0.678962	3.57872	671.5	1.67231	0.557436	1.75213	0.700854	3.42444	-2.07556
673	0.5	1.5	2.62363	0.874544	1.76904	0.707616	4.39267	672.5	2.27306	0.757686	1.71512	0.686049	3.98818	-1.51182		0.813951	0		3.98821			673	0.5	1.5	2.62364	0.874544	1.76904	0.707616	4.39267	672.5	2.27306	0.757686	1.71512	0.686049	3.98818	-1.51182
674	0.866025	1.86603	3.46679	1.1556	2.03654	0.814615	5.50333	673.5	3.06859	1.02286	1.88842	0.755367	4.95701	-0.542991		1.11066	0		4.95705			674	0.866025	1.86603	3.4668	1.1556	2.03653	0.814615	5.50333	673.5	3.0686	1.02286	1.88841	0.755367	4.95701	-0.542991
675	1	2	4.18488	1.39496	2.42822	0.971287	6.6131	674.5	3.84575	1.28192	2.22559	0.890235	6.07133	0.571333		1.10977	0		6.07137			675	1	2	4.18488	1.39496	2.42821	0.971287	6.6131	674.5	3.84575	1.28191	2.22558	0.890235	6.07133	0.571333
676	0.866025	1.86603	4.58548	1.52849	2.83913	1.13565	7.42461	675.5	4.39628	1.46543	2.63628	1.05451	7.03257	1.53257		0.811512	0		7.0326			676	0.866025	1.86603	4.58548	1.52849	2.83913	1.13565	7.42461	675.5	4.39629	1.46543	2.63628	1.05451	7.03257	1.53257
677	0.5	1.5	4.56125	1.52042	3.15918	1.26367	7.72042	676.5	4.57269	1.52423	3.01046	1.20419	7.58315	2.08315		0.295815	0		7.58317			677	0.5	1.5	4.56125	1.52041	3.15917	1.26367	7.72042	676.5	4.5727	1.52423	3.01046	1.20419	7.58315	2.08315
678	2.45023e-14	1	4.11868	1.37289	3.3026	1.32104	7.42128	677.5	4.32769	1.44256	3.24787	1.29915	7.57556	2.07556		-0.299146	0		7.57556			678	2.45023e-14	1	4.11869	1.37289	3.30259	1.32104	7.42128	677.5	4.3277	1.44256	3.24786	1.29915	7.57556	2.07556
679	-0.5	0.5	3.37637	1.12546	3.23096	1.29238	6.60733	678.5	3.72694	1.24231	3.28488	1.31395	7.01182	1.51182		-0.813951	0		7.01181			679	-0.5	0.5	3.37638	1.12546	3.23095	1.29238	6.60733	678.5	3.72695	1.24231	3.28487	1.31395	7.01182	1.51182
680	-0.866025	0.133975	2.53321	0.844402	2.96346	1.18538	5.49667	679.5	2.93141	0.977136	3.11158	1.24463	6.04299	0.542991		-1.11066	3.33067e-16		6.04297			680	-0.866025	0.133975	2.53321	0.844403	2.96346	1.18538	5.49667	679.5	2.93142	0.977137	3.11157	1.24463	6.04299	0.542991
681	-1	0	1.81512	0.60504	2.57178	1.02871	4.3869	680.5	2.15425	0.718085	2.77441	1.10977	4.92867	-0.571333		-1.10977	-2.22045e-16		4.92865			681	-1	0	1.81513	0.605041	2.57178	1.02871	4.3869	680.5	2.15426	0.718085	2.77441	1.10977	4.92867	-0.571333
682	-0.866025	0.133975	1.41452	0.471508	2.16087	0.864347	3.57539	681.5	1.60372	0.534572	2.36372	0.945487	3.96743	-1.53257		-0.811512	-4.44089e-16		3.96743			682	-0.866025	0.133975	1.41453	0.471509	2.16086	0.864347	3.57539	681.5	1.60372	0.534573	2.36371	0.945487	3.96743	-1.53257
683	-0.5	0.5	1.43875	0.479585	1.84082	0.736329	3.27958	682.5	1.42731	0.47577	1.98954	0.795815	3.41685	-2.08315		-0.295815	0		3.41686			683	-0.5	0.5	1.43876	0.479585	1.84082	0.736329	3.27958	682.5	1.42732	0.475771	1.98953	0.795814	3.41685	-2.08315
684	-3.5283e-14	1	1.88132	0.627106	1.6974	0.678962	3.57872	683.5	1.67231	0.557436	1.75213	0.700854	3.42444	-2.07556		0.299146	0		3.42446			684	-3.5283e-14	1	1.88132	0.627106	1.6974	0.678962	3.57872	683.5	1.67231	0.557436	1.75213	0.700854	3.42444	-2.07556
685	0.5	1.5	2.62363	0.874544	1.76904	0.707616	4.39267	684.5	2.27306	0.757686	1.71512	0.686049	3.98818	-1.51182		0.813951	0		3.98821			685	0.5	1.5	2.62364	0.874544	1.76904	0.707616	4.39267	684.5	2.27306	0.757686	1.71512	0.686049	3.98818	-1.51182
686	0.866025	1.86603	3.46679	1.1556	2.03654	0.814615	5.50333	685.5	3.06859	1.02286	1.88842	0.755367	4.95701	-0.542991		1.11066	0		4.95705			686	0.866025	1.86603	3.4668	1.1556	2.03653	0.814615	5.50333	685.5	3.0686	1.02286	1.88841	0.755367	4.95701	-0.542991
687	1	2	4.18488	1.39496	2.42822	0.971287	6.6131	686.5	3.84575	1.28192	2.22559	0.890235	6.07133	0.571333		1.10977	0		6.07137			687	1	2	4.18488	1.39496	2.42821	0.971287	6.6131	686.5	3.84575	1.28191	2.22558	0.890235	6.07133	0.571333
688	0.866025	1.86603	4.58548	1.52849	2.83913	1.13565	7.42461	687.5	4.39628	1.46543	2.63628	1.05451	7.03257	1.53257		0.811512	0		7.0326			688	0.866025	1.86603	4.58548	1.52849	2.83913	1.13565	7.42461	687.5	4.39629	1.46543	2.63628	1.05451	7.03257	1.53257
689	0.5	1.5	4.56125	1.52042	3.15918	1.26367	7.72042	688.5	4.57269	1.52423	3.01046	1.20419	7.58315	2.08315		0.295815	0		7.58317			689	0.5	1.5	4.56125	1.52041	3.15917	1.26367	7.72042	688.5	4.5727	1.52423	3.01046	1.20419	7.58315	2.08315
690	4.60636e-14	1	4.11868	1.37289	3.3026	1.32104	7.42128	689.5	4.32769	1.44256	3.24787	1.29915	7.57556	2.07556		-0.299146	0		7.57556			690	4.60636e-14	1	4.11869	1.37289	3.30259	1.32104	7.42128	689.5	4.3277	1.44256	3.24786	1.29915	7.57556	2.07556
691	-0.5	0.5	3.37637	1.12546	3.23096	1.29238	6.60733	690.5	3.72694	1.24231	3.28488	1.31395	7.01182	1.51182		-0.813951	0		7.01181			691	-0.5	0.5	3.37638	1.12546	3.23095	1.29238	6.60733	690.5	3.72695	1.24231	3.28487	1.31395	7.01182	1.51182
692	-0.866025	0.133975	2.53321	0.844402	2.96346	1.18538	5.49667	691.5	2.93141	0.977136	3.11158	1.24463	6.04299	0.542991		-1.11066	0		6.04297			692	-0.866025	0.133975	2.53321	0.844403	2.96346	1.18538	5.49667	691.5	2.93142	0.977137	3.11157	1.24463	6.04299	0.542991
693	-1	0	1.81512	0.60504	2.57178	1.02871	4.3869	692.5	2.15425	0.718085	2.77441	1.10977	4.92867	-0.571333		-1.10977	-4.44089e-16		4.92865			693	-1	0	1.81513	0.605041	2.57178	1.02871	4.3869	692.5	2.15426	0.718085	2.77441	1.10977	4.92867	-0.571333
694	-0.866025	0.133975	1.41452	0.471508	2.16087	0.864347	3.57539	693.5	1.60372	0.534572	2.36372	0.945487	3.96743	-1.53257		-0.811512	8.88178e-16		3.96743			694	-0.866025	0.133975	1.41453	0.471509	2.16086	0.864347	3.57539	693.5	1.60372	0.534573	2.36371	0.945487	3.96743	-1.53257
695	-0.5	0.5	1.43875	0.479585	1.84082	0.736329	3.27958	694.5	1.42731	0.47577	1.98954	0.795815	3.41685	-2.08315		-0.295815	0		3.41686			695	-0.5	0.5	1.43876	0.479585	1.84082	0.736329	3.27958	694.5	1.42732	0.475771	1.98953	0.795814	3.41685	-2.08315
696	-5.68443e-14	1	1.88132	0.627106	1.6974	0.678962	3.57872	695.5	1.67231	0.557436	1.75213	0.700854	3.42444	-2.07556		0.299146	0		3.42446			696	-5.68443e-14	1	1.88132	0.627106	1.6974	0.678962	3.57872	695.5	1.67231	0.557436	1.75213	0.700854	3.42444	-2.07556
697	0.5	1.5	2.62363	0.874544	1.76904	0.707616	4.39267	696.5	2.27306	0.757686	1.71512	0.686049	3.98818	-1.51182		0.813951	0		3.98821			697	0.5	1.5	2.62364	0.874544	1.76904	0.707616	4.39267	696.5	2.27306	0.757686	1.71512	0.686049	3.98818	-1.51182
698	0.866025	1.86603	3.46679	1.1556	2.03654	0.814615	5.50333	697.5	3.06859	1.02286	1.88842	0.755367	4.95701	-0.542991		1.11066	0		4.95705			698	0.866025	1.86603	3.4668	1.1556	2.03653	0.814615	5.50333	697.5	3.0686	1.02286	1.88841	0.755367	4.95701	-0.542991
699	1	2	4.18488	1.39496	2.42822	0.971287	6.6131	698.5	3.84575	1.28192	2.22559	0.890235	6.07133	0.571333		1.10977	0		6.07137			699	1	2	4.18488	1.39496	2.42821	0.971287	6.6131	698.5	3.84575	1.28191	2.22558	0.890235	6.07133	0.571333
700	0.866025	1.86603	4.58548	1.52849	2.83913	1.13565	7.42461	699.5	4.39628	1.46543	2.63628	1.05451	7.03257	1.53257		0.811512	0		7.0326			700	0.866025	1.86603	4.58548	1.52849	2.83913	1.13565	7.42461	699.5	4.39629	1.46543	2.63628	1.05451	7.03257	1.53257
701	0.5	1.5	4.56125	1.52042	3.15918	1.26367	7.72042	700.5	4.57269	1.52423	3.01046	1.20419	7.58315	2.08315		0.295815	0		7.58317			701	0.5	1.5	4.56125	1.52041	3.15917	1.26367	7.72042	700.5	4.5727	1.52423	3.01046	1.20419	7.58315	2.08315
702	6.76249e-14	1	4.11868	1.37289	3.3026	1.32104	7.42128	701.5	4.32769	1.44256	3.24787	1.29915	7.57556	2.07556		-0.299146	0		7.57556			702	6.76249e-14	1	4.11869	1.37289	3.30259	1.32104	7.42128	701.5	4.3277	1.44256	3.24786	1.29915	7.57556	2.07556
703	-0.5	0.5	3.37637	1.12546	3.23096	1.29238	6.60733	702.5	3.72694	1.24231	3.28488	1.31395	7.01182	1.51182		-0.813951	0		7.01181			703	-0.5	0.5	3.37638	1.12546	3.23095	1.29238	6.60733	702.5	3.72695	1.24231	3.28487	1.31395	7.01182	1.51182
704	-0.866025	0.133975	2.53321	0.844402	2.96346	1.18538	5.49667	703.5	2.93141	0.977136	3.11158	1.24463	6.04299	0.542991		-1.11066	-2.22045e-16		6.04297			704	-0.866025	0.133975	2.53321	0.844403	2.96346	1.18538	5.49667	703.5	2.93142	0.977137	3.11157	1.24463	6.04299	0.542991
705	-1	0	1.81512	0.60504	2.57178	1.02871	4.3869	704.5	2.15425	0.718085	2.77441	1.10977	4.92867	-0.571333		-1.10977	-2.22045e-16		4.92865			705	-1	0	1.81513	0.605041	2.57178	1.02871	4.3869	704.5	2.15426	0.718085	2.77441	1.10977	4.92867	-0.571333
706	-0.866025	0.133975	1.41452	0.471508	2.16087	0.864347	3.57539	705.5	1.60372	0.534572	2.36372	0.945487	3.96743	-1.53257		-0.811512	3.33067e-16		3.96743			706	-0.866025	0.133975	1.41453	0.471509	2.16086	0.864347	3.57539	705.5	1.60372	0.534573	2.36371	0.945487	3.96743	-1.53257
707	-0.5	0.5	1.43875	0.479585	1.84082	0.736329	3.27958	706.5	1.42731	0.47577	1.98954	0.795815	3.41685	-2.08315		-0.295815	0		3.41686			707	-0.5	0.5	1.43876	0.479585	1.84082	0.736329	3.27958	706.5	1.42732	0.475771	1.98953	0.795814	3.41685	-2.08315
708	-2.15622e-14	1	1.88132	0.627106	1.6974	0.678962	3.57872	707.5	1.67231	0.557436	1.75213	0.700854	3.42444	-2.07556		0.299146	0		3.42446			708	-2.15622e-14	1	1.88132	0.627106	1.6974	0.678962	3.57872	707.5	1.67231	0.557436	1.75213	0.700854	3.42444	-2.07556
709	0.5	1.5	2.62363	0.874544	1.76904	0.707616	4.39267	708.5	2.27306	0.757686	1.71512	0.686049	3.98818	-1.51182		0.813951	0		3.98821			709	0.5	1.5	2.62364	0.874544	1.76904	0.707616	4.39267	708.5	2.27306	0.757686	1.71512	0.686049	3.98818	-1.51182
710	0.866025	1.86603	3.46679	1.1556	2.03654	0.814615	5.50333	709.5	3.06859	1.02286	1.88842	0.755367	4.95701	-0.542991		1.11066	0		4.95705			710	0.866025	1.86603	3.4668	1.1556	2.03653	0.814615	5.50333	709.5	3.0686	1.02286	1.88841	0.755367	4.95701	-0.542991
711	1	2	4.18488	1.39496	2.42822	0.971287	6.6131	710.5	3.84575	1.28192	2.22559	0.890235	6.07133	0.571333		1.10977	0		6.07137			711	1	2	4.18488	1.39496	2.42821	0.971287	6.6131	710.5	3.84575	1.28191	2.22558	0.890235	6.07133	0.571333
712	0.866025	1.86603	4.58548	1.52849	2.83913	1.13565	7.42461	711.5	4.39628	1.46543	2.63628	1.05451	7.03257	1.53257		0.811512	0		7.0326			712	0.866025	1.86603	4.58548	1.52849	2.83913	1.13565	7.42461	711.5	4.39629	1.46543	2.63628	1.05451	7.03257	1.53257
713	0.5	1.5	4.56125	1.52042	3.15918	1.26367	7.72042	712.5	4.57269	1.52423	3.01046	1.20419	7.58315	2.08315		0.295815	0		7.58317			713	0.5	1.5	4.56125	1.52041	3.15917	1.26367	7.72042	712.5	4.5727	1.52423	3.01046	1.20419	7.58315	2.08315
714	3.23428e-14	1	4.11868	1.37289	3.3026	1.32104	7.42128	713.5	4.32769	1.44256	3.24787	1.29915	7.57556	2.07556		-0.299146	0		7.57556			714	3.23428e-14	1	4.11869	1.37289	3.30259	1.32104	7.42128	713.5	4.3277	1.44256	3.24786	1.29915	7.57556	2.07556
715	-0.5	0.5	3.37637	1.12546	3.23096	1.29238	6.60733	714.5	3.72694	1.24231	3.28488	1.31395	7.01182	1.51182		-0.813951	0		7.01181			715	-0.5	0.5	3.37638	1.12546	3.23095	1.29238	6.60733	714.5	3.72695	1.24231	3.28487	1.31395	7.01182	1.51182
716	-0.866025	0.133975	2.53321	0.844402	2.96346	1.18538	5.49667	715.5	2.93141	0.977136	3.11158	1.24463	6.04299	0.542991		-1.11066	7.77156e-16		6.04297			716	-0.866025	0.133975	2.53321	0.844403	2.96346	1.18538	5.49667	715.5	2.93142	0.977137	3.11157	1.24463	6.04299	0.542991
717	-1	0	1.81512	0.60504	2.57178	1.02871	4.3869	716.5	2.15425	0.718085	2.77441	1.10977	4.92867	-0.571333		-1.10977	-4.44089e-16		4.92865			717	-1	0	1.81513	0.605041	2.57178	1.02871	4.3869	716.5	2.15426	0.718085	2.77441	1.10977	4.92867	-0.571333
718	-0.866025	0.133975	1.41452	0.471508	2.16087	0.864347	3.57539	717.5	1.60372	0.534572	2.36372	0.945487	3.96743	-1.53257		-0.811512	-3.33067e-16		3.96743			718	-0.866025	0.133975	1.41453	0.471509	2.16086	0.864347	3.57539	717.5	1.60372	0.534573	2.36371	0.945487	3.96743	-1.53257
719	-0.5	0.5	1.43875	0.479585	1.84082	0.736329	3.27958	718.5	1.42731	0.47577	1.98954	0.795815	3.41685	-2.08315		-0.295815	0		3.41686			719	-0.5	0.5	1.43876	0.479585	1.84082	0.736329	3.27958	718.5	1.42732	0.475771	1.98953	0.795814	3.41685	-2.08315
720	-4.31235e-14	1	1.88132	0.627106	1.6974	0.678962	3.57872	719.5	1.67231	0.557436	1.75213	0.700854	3.42444	-2.07556		0.299146	0		3.42446			720	-4.31235e-14	1	1.88132	0.627106	1.6974	0.678962	3.57872	719.5	1.67231	0.557436	1.75213	0.700854	3.42444	-2.07556
721	0.5	1.5	2.62363	0.874544	1.76904	0.707616	4.39267	720.5	2.27306	0.757686	1.71512	0.686049	3.98818	-1.51182		0.813951	0		3.98821			721	0.5	1.5	2.62364	0.874544	1.76904	0.707616	4.39267	720.5	2.27306	0.757686	1.71512	0.686049	3.98818	-1.51182
722	0.866025	1.86603	3.46679	1.1556	2.03654	0.814615	5.50333	721.5	3.06859	1.02286	1.88842	0.755367	4.95701	-0.542991		1.11066	0		4.95705			722	0.866025	1.86603	3.4668	1.1556	2.03653	0.814615	5.50333	721.5	3.0686	1.02286	1.88841	0.755367	4.95701	-0.542991
723	1	2	4.18488	1.39496	2.42822	0.971287	6.6131	722.5	3.84575	1.28192	2.22559	0.890235	6.07133	0.571333		1.10977	0		6.07137			723	1	2	4.18488	1.39496	2.42821	0.971287	6.6131	722.5	3.84575	1.28191	2.22558	0.890235	6.07133	0.571333
724	0.866025	1.86603	4.58548	1.52849	2.83913	1.13565	7.42461	723.5	4.39628	1.46543	2.63628	1.05451	7.03257	1.53257		0.811512	0		7.0326			724	0.866025	1.86603	4.58548	1.52849	2.83913	1.13565	7.42461	723.5	4.39629	1.46543	2.63628	1.05451	7.03257	1.53257
725	0.5	1.5	4.56125	1.52042	3.15918	1.26367	7.72042	724.5	4.57269	1.52423	3.01046	1.20419	7.58315	2.08315		0.295815	0		7.58317			725	0.5	1.5	4.56125	1.52041	3.15917	1.26367	7.72042	724.5	4.5727	1.52423	3.01046	1.20419	7.58315	2.08315
726	5.39041e-14	1	4.11868	1.37289	3.3026	1.32104	7.42128	725.5	4.32769	1.44256	3.24787	1.29915	7.57556	2.07556		-0.299146	0		7.57556			726	5.39041e-14	1	4.11869	1.37289	3.30259	1.32104	7.42128	725.5	4.3277	1.44256	3.24786	1.29915	7.57556	2.07556
727	-0.5	0.5	3.37637	1.12546	3.23096	1.29238	6.60733	726.5	3.72694	1.24231	3.28488	1.31395	7.01182	1.51182		-0.813951	0		7.01181			727	-0.5	0.5	3.37638	1.12546	3.23095	1.29238	6.60733	726.5	3.72695	1.24231	3.28487	1.31395	7.01182	1.51182
728	-0.866025	0.133975	2.53321	0.844402	2.96346	1.18538	5.49667	727.5	2.93141	0.977136	3.11158	1.24463	6.04299	0.542991		-1.11066	1.33227e-15		6.04297			728	-0.866025	0.133975	2.53321	0.844403	2.96346	1.18538	5.49667	727.5	2.93142	0.977137	3.11157	1.24463	6.04299	0.542991
729	-1	0	1.81512	0.60504	2.57178	1.02871	4.3869	728.5	2.15425	0.718085	2.77441	1.10977	4.92867	-0.571333		-1.10977	-1.11022e-15		4.92865			729	-1	0	1.81513	0.605041	2.57178	1.02871	4.3869	728.5	2.15426	0.718085	2.77441	1.10977	4.92867	-0.571333
730	-0.866025	0.133975	1.41452	0.471508	2.16087	0.864347	3.57539	729.5	1.60372	0.534572	2.36372	0.945487	3.96743	-1.53257		-0.811512	2.22045e-16		3.96743			730	-0.866025	0.133975	1.41453	0.471509	2.16086	0.864347	3.57539	729.5	1.60372	0.534573	2.36371	0.945487	3.96743	-1.53257
731	-0.5	0.5	1.43875	0.479585	1.84082	0.736329	3.27958	730.5	1.42731	0.47577	1.98954	0.795815	3.41685	-2.08315		-0.295815	0		3.41686			731	-0.5	0.5	1.43876	0.479585	1.84082	0.736329	3.27958	730.5	1.42732	0.475771	1.98953	0.795814	3.41685	-2.08315
732	-6.46848e-14	1	1.88132	0.627106	1.6974	0.678962	3.57872	731.5	1.67231	0.557436	1.75213	0.700854	3.42444	-2.07556		0.299146	0		3.42446			732	-6.46848e-14	1	1.88132	0.627106	1.6974	0.678962	3.57872	731.5	1.67231	0.557436	1.75213	0.700854	3.42444	-2.07556
733	0.5	1.5	2.62363	0.874544	1.76904	0.707616	4.39267	732.5	2.27306	0.757686	1.71512	0.686049	3.98818	-1.51182		0.813951	0		3.98821			733	0.5	1.5	2.62364	0.874544	1.76904	0.707616	4.39267	732.5	2.27306	0.757686	1.71512	0.686049	3.98818	-1.51182
734	0.866025	1.86603	3.46679	1.1556	2.03654	0.814615	5.50333	733.5	3.06859	1.02286	1.88842	0.755367	4.95701	-0.542991		1.11066	0		4.95705			734	0.866025	1.86603	3.4668	1.1556	2.03653	0.814615	5.50333	733.5	3.0686	1.02286	1.88841	0.755367	4.95701	-0.542991
735	1	2	4.18488	1.39496	2.42822	0.971287	6.6131	734.5	3.84575	1.28192	2.22559	0.890235	6.07133	0.571333		1.10977	0		6.07137			735	1	2	4.18488	1.39496	2.42821	0.971287	6.6131	734.5	3.84575	1.28191	2.22558	0.890235	6.07133	0.571333
736	0.866025	1.86603	4.58548	1.52849	2.83913	1.13565	7.42461	735.5	4.39628	1.46543	2.63628	1.05451	7.03257	1.53257		0.811512	0		7.0326			736	0.866025	1.86603	4.58548	1.52849	2.83913	1.13565	7.42461	735.5	4.39629	1.46543	2.63628	1.05451	7.03257	1.53257
737	0.5	1.5	4.56125	1.52042	3.15918	1.26367	7.72042	736.5	4.57269	1.52423	3.01046	1.20419	7.58315	2.08315		0.295815	0		7.58317			737	0.5	1.5	4.56125	1.52041	3.15917	1.26367	7.72042	736.5	4.5727	1.52423	3.01046	1.20419	7.58315	2.08315
738	1.8622e-14	1	4.11868	1.37289	3.3026	1.32104	7.42128	737.5	4.32769	1.44256	3.24787	1.29915	7.57556	2.07556		-0.299146	0		7.57556			738	1.8622e-14	1	4.11869	1.37289	3.30259	1.32104	7.42128	737.5	4.3277	1.44256	3.24786	1.29915	7.57556	2.07556
739	-0.5	0.5	3.37637	1.12546	3.23096	1.29238	6.60733	738.5	3.72694	1.24231	3.28488	1.31395	7.01182	1.51182		-0.813951	0		7.01181			739	-0.5	0.5	3.37638	1.12546	3.23095	1.29238	6.60733	738.5	3.72695	1.24231	3.28487	1.31395	7.01182	1.51182
740	-0.866025	0.133975	2.53321	0.844402	2.96346	1.18538	5.49667	739.5	2.93141	0.977136	3.11158	1.24463	6.04299	0.542991		-1.11066	3.33067e-16		6.04297			740	-0.866025	0.133975	2.53321	0.844403	2.96346	1.18538	5.49667	739.5	2.93142	0.977137	3.11157	1.24463	6.04299	0.542991
741	-1	0	1.81512	0.60504	2.57178	1.02871	4.3869	740.5	2.15425	0.718085	2.77441	1.10977	4.92867	-0.571333		-1.10977	-2.22045e-16		4.92865			741	-1	0	1.81513	0.605041	2.57178	1.02871	4.3869	740.5	2.15426	0.718085	2.77441	1.10977	4.92867	-0.571333
742	-0.866025	0.133975	1.41452	0.471508	2.16087	0.864347	3.57539	741.5	1.60372	0.534572	2.36372	0.945487	3.96743	-1.53257		-0.811512	-5.55112e-16		3.96743			742	-0.866025	0.133975	1.41453	0.471509	2.16086	0.864347	3.57539	741.5	1.60372	0.534573	2.36371	0.945487	3.96743	-1.53257
743	-0.5	0.5	1.43875	0.479585	1.84082	0.736329	3.27958	742.5	1.42731	0.47577	1.98954	0.795815	3.41685	-2.08315		-0.295815	0		3.41686			743	-0.5	0.5	1.43876	0.479585	1.84082	0.736329	3.27958	742.5	1.42732	0.475771	1.98953	0.795814	3.41685	-2.08315
744	-2.94027e-14	1	1.88132	0.627106	1.6974	0.678962	3.57872	743.5	1.67231	0.557436	1.75213	0.700854	3.42444	-2.07556		0.299146	0		3.42446			744	-2.94027e-14	1	1.88132	0.627106	1.6974	0.678962	3.57872	743.5	1.67231	0.557436	1.75213	0.700854	3.42444	-2.07556
745	0.5	1.5	2.62363	0.874544	1.76904	0.707616	4.39267	744.5	2.27306	0.757686	1.71512	0.686049	3.98818	-1.51182		0.813951	0		3.98821			745	0.5	1.5	2.62364	0.874544	1.76904	0.707616	4.39267	744.5	2.27306	0.757686	1.71512	0.686049	3.98818	-1.51182
746	0.866025	1.86603	3.46679	1.1556	2.03654	0.814615	5.50333	745.5	3.06859	1.02286	1.88842	0.755367	4.95701	-0.542991		1.11066	0		4.95705			746	0.866025	1.86603	3.4668	1.1556	2.03653	0.814615	5.50333	745.5	3.0686	1.02286	1.88841	0.755367	4.95701	-0.542991
747	1	2	4.18488	1.39496	2.42822	0.971287	6.6131	746.5	3.84575	1.28192	2.22559	0.890235	6.07133	0.571333		1.10977	0		6.07137			747	1	2	4.18488	1.39496	2.42821	0.971287	6.6131	746.5	3.84575	1.28191	2.22558	0.890235	6.07133	0.571333
748	0.866025	1.86603	4.58548	1.52849	2.83913	1.13565	7.42461	747.5	4.39628	1.46543	2.63628	1.05451	7.03257	1.53257		0.811512	0		7.0326			748	0.866025	1.86603	4.58548	1.52849	2.83913	1.13565	7.42461	747.5	4.39629	1.46543	2.63628	1.05451	7.03257	1.53257
749	0.5	1.5	4.56125	1.52042	3.15918	1.26367	7.72042	748.5	4.57269	1.52423	3.01046	1.20419	7.58315	2.08315		0.295815	0		7.58317			749	0.5	1.5	4.56125	1.52041	3.15917	1.26367	7.72042	748.5	4.5727	1.52423	3.01046	1.20419	7.58315	2.08315
750	4.01834e-14	1	4.11868	1.37289	3.3026	1.32104	7.42128	749.5	4.32769	1.44256	3.24787	1.29915	7.57556	2.07556		-0.299146	0		7.57556			750	4.01834e-14	1	4.11869	1.37289	3.30259	1.32104	7.42128	749.5	4.3277	1.44256	3.24786	1.29915	7.57556	2.07556
751	-0.5	0.5	3.37637	1.12546	3.23096	1.29238	6.60733	750.5	3.72694	1.24231	3.28488	1.31395	7.01182	1.51182		-0.813951	0		7.01181			751	-0.5	0.5	3.37638	1.12546	3.23095	1.29238	6.60733	750.5	3.72695	1.24231	3.28487	1.31395	7.01182	1.51182
752	-0.866025	0.133975	2.53321	0.844402	2.96346	1.18538	5.49667	751.5	2.93141	0.977136	3.11158	1.24463	6.04299	0.542991		-1.11066	-4.44089e-16		6.04297			752	-0.866025	0.133975	2.53321	0.844403	2.96346	1.18538	5.49667	751.5	2.93142	0.977137	3.11157	1.24463	6.04299	0.542991
753	-1	0	1.81512	0.60504	2.57178	1.02871	4.3869	752.5	2.15425	0.718085	2.77441	1.10977	4.92867	-0.571333		-1.10977	0		4.92865			753	-1	0	1.81513	0.605041	2.57178	1.02871	4.3869	752.5	2.15426	0.718085	2.77441	1.10977	4.92867	-0.571333
754	-0.866025	0.133975	1.41452	0.471508	2.16087	0.864347	3.57539	753.5	1.60372	0.534572	2.36372	0.945487	3.96743	-1.53257		-0.811512	-4.44089e-16		3.96743			754	-0.866025	0.133975	1.41453	0.471509	2.16086	0.864347	3.57539	753.5	1.60372	0.534573	2.36371	0.945487	3.96743	-1.53257
755	-0.5	0.5	1.43875	0.479585	1.84082	0.736329	3.27958	754.5	1.42731	0.47577	1.98954	0.795815	3.41685	-2.08315		-0.295815	0		3.41686			755	-0.5	0.5	1.43876	0.479585	1.84082	0.736329	3.27958	754.5	1.42732	0.475771	1.98953	0.795814	3.41685	-2.08315
756	-5.0964e-14	1	1.88132	0.627106	1.6974	0.678962	3.57872	755.5	1.67231	0.557436	1.75213	0.700854	3.42444	-2.07556		0.299146	0		3.42446			756	-5.0964e-14	1	1.88132	0.627106	1.6974	0.678962	3.57872	755.5	1.67231	0.557436	1.75213	0.700854	3.42444	-2.07556
757	0.5	1.5	2.62363	0.874544	1.76904	0.707616	4.39267	756.5	2.27306	0.757686	1.71512	0.686049	3.98818	-1.51182		0.813951	0		3.98821			757	0.5	1.5	2.62364	0.874544	1.76904	0.707616	4.39267	756.5	2.27306	0.757686	1.71512	0.686049	3.98818	-1.51182
758	0.866025	1.86603	3.46679	1.1556	2.03654	0.814615	5.50333	757.5	3.06859	1.02286	1.88842	0.755367	4.95701	-0.542991		1.11066	0		4.95705			758	0.866025	1.86603	3.4668	1.1556	2.03653	0.814615	5.50333	757.5	3.0686	1.02286	1.88841	0.755367	4.95701	-0.542991
759	1	2	4.18488	1.39496	2.42822	0.971287	6.6131	758.5	3.84575	1.28192	2.22559	0.890235	6.07133	0.571333		1.10977	0		6.07137			759	1	2	4.18488	1.39496	2.42821	0.971287	6.6131	758.5	3.84575	1.28191	2.22558	0.890235	6.07133	0.571333
760	0.866025	1.86603	4.58548	1.52849	2.83913	1.13565	7.42461	759.5	4.39628	1.46543	2.63628	1.05451	7.03257	1.53257		0.811512	0		7.0326			760	0.866025	1.86603	4.58548	1.52849	2.83913	1.13565	7.42461	759.5	4.39629	1.46543	2.63628	1.05451	7.03257	1.53257
761	0.5	1.5	4.56125	1.52042	3.15918	1.26367	7.72042	760.5	4.57269	1.52423	3.01046	1.20419	7.58315	2.08315		0.295815	0		7.58317			761	0.5	1.5	4.56125	1.52041	3.15917	1.26367	7.72042	760.5	4.5727	1.52423	3.01046	1.20419	7.58315	2.08315
762	6.17447e-14	1	4.11868	1.37289	3.3026	1.32104	7.42128	761.5	4.32769	1.44256	3.24787	1.29915	7.57556	2.07556		-0.299146	0		7.57556			762	6.17447e-14	1	4.11869	1.37289	3.30259	1.32104	7.42128	761.5	4.3277	1.44256	3.24786	1.29915	7.57556	2.07556
763	-0.5	0.5	3.37637	1.12546	3.23096	1.29238	6.60733	762.5	3.72694	1.24231	3.28488	1.31395	7.01182	1.51182		-0.813951	0		7.01181			763	-0.5	0.5	3.37638	1.12546	3.23095	1.29238	6.60733	762.5	3.72695	1.24231	3.28487	1.31395	7.01182	1.51182
764	-0.866025	0.133975	2.53321	0.844402	2.96346	1.18538	5.49667	763.5	2.93141	0.977136	3.11158	1.24463	6.04299	0.542991		-1.11066	-3.33067e-16		6.04297			764	-0.866025	0.133975	2.53321	0.844403	2.96346	1.18538	5.49667	763.5	2.93142	0.977137	3.11157	1.24463	6.04299	0.542991
765	-1	0	1.81512	0.60504	2.57178	1.02871	4.3869	764.5	2.15425	0.718085	2.77441	1.10977	4.92867	-0.571333		-1.10977	4.44089e-16		4.92865			765	-1	0	1.81513	0.605041	2.57178	1.02871	4.3869	764.5	2.15426	0.718085	2.77441	1.10977	4.92867	-0.571333
766	-0.866025	0.133975	1.41452	0.471508	2.16087	0.864347	3.57539	765.5	1.60372	0.534572	2.36372	0.945487	3.96743	-1.53257		-0.811512	-5.55112e-16		3.96743			766	-0.866025	0.133975	1.41453	0.471509	2.16086	0.864347	3.57539	765.5	1.60372	0.534573	2.36371	0.945487	3.96743	-1.53257
767	-0.5	0.5	1.43875	0.479585	1.84082	0.736329	3.27958	766.5	1.42731	0.47577	1.98954	0.795815	3.41685	-2.08315		-0.295815	0		3.41686			767	-0.5	0.5	1.43876	0.479585	1.84082	0.736329	3.27958	766.5	1.42732	0.475771	1.98953	0.795814	3.41685	-2.08315
768	-1.56819e-14	1	1.88132	0.627106	1.6974	0.678962	3.57872	767.5	1.67231	0.557436	1.75213	0.700854	3.42444	-2.07556		0.299146	0		3.42446			768	-1.56819e-14	1	1.88132	0.627106	1.6974	0.678962	3.57872	767.5	1.67231	0.557436	1.75213	0.700854	3.42444	-2.07556
769	0.5	1.5	2.62363	0.874544	1.76904	0.707616	4.39267	768.5	2.27306	0.757686	1.71512	0.686049	3.98818	-1.51182		0.813951	0		3.98821			769	0.5	1.5	2.62364	0.874544	1.76904	0.707616	4.39267	768.5	2.27306	0.757686	1.71512	0.686049	3.98818	-1.51182
770	0.866025	1.86603	3.46679	1.1556	2.03654	0.814615	5.50333	769.5	3.06859	1.02286	1.88842	0.755367	4.95701	-0.542991		1.11066	0		4.95705			770	0.866025	1.86603	3.4668	1.1556	2.03653	0.814615	5.50333	769.5	3.0686	1.02286	1.88841	0.755367	4.95701	-0.542991
771	1	2	4.18488	1.39496	2.42822	0.971287	6.6131	770.5	3.84575	1.28192	2.22559	0.890235	6.07133	0.571333		1.10977	0		6.07137			771	1	2	4.18488	1.39496	2.42821	0.971287	6.6131	770.5	3.84575	1.28191	2.22558	0.890235	6.07133	0.571333
772	0.866025	1.86603	4.58548	1.52849	2.83913	1.13565	7.42461	771.5	4.39628	1.46543	2.63628	1.05451	7.03257	1.53257		0.811512	0		7.0326			772	0.866025	1.86603	4.58548	1.52849	2.83913	1.13565	7.42461	771.5	4.39629	1.46543	2.63628	1.05451	7.03257	1.53257
773	0.5	1.5	4.56125	1.52042	3.15918	1.26367	7.72042	772.5	4.57269	1.52423	3.01046	1.20419	7.58315	2.08315		0.295815	0		7.58317			773	0.5	1.5	4.56125	1.52041	3.15917	1.26367	7.72042	772.5	4.5727	1.52423	3.01046	1.20419	7.58315	2.08315
774	2.64626e-14	1	4.11868	1.37289	3.3026	1.32104	7.42128	773.5	4.32769	1.44256	3.24787	1.29915	7.57556	2.07556		-0.299146	0		7.57556			774	2.64626e-14	1	4.11869	1.37289	3.30259	1.32104	7.42128	773.5	4.3277	1.44256	3.24786	1.29915	7.57556	2.07556
775	-0.5	0.5	3.37637	1.12546	3.23096	1.29238	6.60733	774.5	3.72694	1.24231	3.28488	1.31395	7.01182	1.51182		-0.813951	0		7.01181			775	-0.5	0.5	3.37638	1.12546	3.23095	1.29238	6.60733	774.5	3.72695	1.24231	3.28487	1.31395	7.01182	1.51182
776	-0.866025	0.133975	2.53321	0.844402	2.96346	1.18538	5.49667	775.5	2.93141	0.977136	3.11158	1.24463	6.04299	0.542991		-1.11066	4.44089e-16		6.04297			776	-0.866025	0.133975	2.53321	0.844403	2.96346	1.18538	5.49667	775.5	2.93142	0.977137	3.11157	1.24463	6.04299	0.542991
777	-1	0	1.81512	0.60504	2.57178	1.02871	4.3869	776.5	2.15425	0.718085	2.77441	1.10977	4.92867	-0.571333		-1.10977	-4.44089e-16		4.92865			777	-1	0	1.81513	0.605041	2.57178	1.02871	4.3869	776.5	2.15426	0.718085	2.77441	1.10977	4.92867	-0.571333
778	-0.866025	0.133975	1.41452	0.471508	2.16087	0.864347	3.57539	777.5	1.60372	0.534572	2.36372	0.945487	3.96743	-1.53257		-0.811512	4.44089e-16		3.96743			778	-0.866025	0.133975	1.41453	0.471509	2.16086	0.864347	3.57539	777.5	1.60372	0.534573	2.36371	0.945487	3.96743	-1.53257
779	-0.5	0.5	1.43875	0.479585	1.84082	0.736329	3.27958	778.5	1.42731	0.47577	1.98954	0.795815	3.41685	-2.08315		-0.295815	0		3.41686			779	-0.5	0.5	1.43876	0.479585	1.84082	0.736329	3.27958	778.5	1.42732	0.475771	1.98953	0.795814	3.41685	-2.08315
780	-3.72432e-14	1	1.88132	0.627106	1.6974	0.678962	3.57872	779.5	1.67231	0.557436	1.75213	0.700854	3.42444	-2.07556		0.299146	0		3.42446			780	-3.72432e-14	1	1.88132	0.627106	1.6974	0.678962	3.57872	779.5	1.67231	0.557436	1.75213	0.700854	3.42444	-2.07556
781	0.5	1.5	2.62363	0.874544	1.76904	0.707616	4.39267	780.5	2.27306	0.757686	1.71512	0.686049	3.98818	-1.51182		0.813951	0		3.98821			781	0.5	1.5	2.62364	0.874544	1.76904	0.707616	4.39267	780.5	2.27306	0.757686	1.71512	0.686049	3.98818	-1.51182
782	0.866025	1.86603	3.46679	1.1556	2.03654	0.814615	5.50333	781.5	3.06859	1.02286	1.88842	0.755367	4.95701	-0.542991		1.11066	0		4.95705			782	0.866025	1.86603	3.4668	1.1556	2.03653	0.814615	5.50333	781.5	3.0686	1.02286	1.88841	0.755367	4.95701	-0.542991
783	1	2	4.18488	1.39496	2.42822	0.971287	6.6131	782.5	3.84575	1.28192	2.22559	0.890235	6.07133	0.571333		1.10977	0		6.07137			783	1	2	4.18488	1.39496	2.42821	0.971287	6.6131	782.5	3.84575	1.28191	2.22558	0.890235	6.07133	0.571333
784	0.866025	1.86603	4.58548	1.52849	2.83913	1.13565	7.42461	783.5	4.39628	1.46543	2.63628	1.05451	7.03257	1.53257		0.811512	0		7.0326			784	0.866025	1.86603	4.58548	1.52849	2.83913	1.13565	7.42461	783.5	4.39629	1.46543	2.63628	1.05451	7.03257	1.53257
785	0.5	1.5	4.56125	1.52042	3.15918	1.26367	7.72042	784.5	4.57269	1.52423	3.01046	1.20419	7.58315	2.08315		0.295815	0		7.58317			785	0.5	1.5	4.56125	1.52041	3.15917	1.26367	7.72042	784.5	4.5727	1.52423	3.01046	1.20419	7.58315	2.08315
786	4.80239e-14	1	4.11868	1.37289	3.3026	1.32104	7.42128	785.5	4.32769	1.44256	3.24787	1.29915	7.57556	2.07556		-0.299146	0		7.57556			786	4.80239e-14	1	4.11869	1.37289	3.30259	1.32104	7.42128	785.5	4.3277	1.44256	3.24786	1.29915	7.57556	2.07556
787	-0.5	0.5	3.37637	1.12546	3.23096	1.29238	6.60733	786.5	3.72694	1.24231	3.28488	1.31395	7.01182	1.51182		-0.813951	0		7.01181			787	-0.5	0.5	3.37638	1.12546	3.23095	1.29238	6.60733	786.5	3.72695	1.24231	3.28487	1.31395	7.01182	1.51182
788	-0.866025	0.133975	2.53321	0.844402	2.96346	1.18538	5.49667	787.5	2.93141	0.977136	3.11158	1.24463	6.04299	0.542991		-1.11066	9.99201e-16		6.04297			788	-0.866025	0.133975	2.53321	0.844403	2.96346	1.18538	5.49667	787.5	2.93142	0.977137	3.11157	1.24463	6.04299	0.542991
789	-1	0	1.81512	0.60504	2.57178	1.02871	4.3869	788.5	2.15425	0.718085	2.77441	1.10977	4.92867	-0.571333		-1.10977	0		4.92865			789	-1	0	1.81513	0.605041	2.57178	1.02871	4.3869	788.5	2.15426	0.718085	2.77441	1.10977	4.92867	-0.571333
790	-0.866025	0.133975	1.41452	0.471508	2.16087	0.864347	3.57539	789.5	1.60372	0.534572	2.36372	0.945487	3.96743	-1.53257		-0.811512	-4.44089e-16		3.96743			790	-0.866025	0.133975	1.41453	0.471509	2.16086	0.864347	3.57539	789.5	1.60372	0.534573	2.36371	0.945487	3.96743	-1.53257
791	-0.5	0.5	1.43875	0.479585	1.84082	0.736329	3.27958	790.5	1.42731	0.47577	1.98954	0.795815	3.41685	-2.08315		-0.295815	0		3.41686			791	-0.5	0.5	1.43876	0.479585	1.84082	0.736329	3.27958	790.5	1.42732	0.475771	1.98953	0.795814	3.41685	-2.08315
792	-5.88045e-14	1	1.88132	0.627106	1.6974	0.678962	3.57872	791.5	1.67231	0.557436	1.75213	0.700854	3.42444	-2.07556		0.299146	0		3.42446			792	-5.88045e-14	1	1.88132	0.627106	1.6974	0.678962	3.57872	791.5	1.67231	0.557436	1.75213	0.700854	3.42444	-2.07556
793	0.5	1.5	2.62363	0.874544	1.76904	0.707616	4.39267	792.5	2.27306	0.757686	1.71512	0.686049	3.98818	-1.51182		0.813951	0		3.98821			793	0.5	1.5	2.62364	0.874544	1.76904	0.707616	4.39267	792.5	2.27306	0.757686	1.71512	0.686049	3.98818	-1.51182
794	0.866025	1.86603	3.46679	1.1556	2.03654	0.814615	5.50333	793.5	3.06859	1.02286	1.88842	0.755367	4.95701	-0.542991		1.11066	0		4.95705			794	0.866025	1.86603	3.4668	1.1556	2.03653	0.814615	5.50333	793.5	3.0686	1.02286	1.88841	0.755367	4.95701	-0.542991
795	1	2	4.18488	1.39496	2.42822	0.971287	6.6131	794.5	3.84575	1.28192	2.22559	0.890235	6.07133	0.571333		1.10977	0		6.07137			795	1	2	4.18488	1.39496	2.42821	0.971287	6.6131	794.5	3.84575	1.28191	2.22558	0.890235	6.07133	0.571333
796	0.866025	1.86603	4.58548	1.52849	2.83913	1.13565	7.42461	795.5	4.39628	1.46543	2.63628	1.05451	7.03257	1.53257		0.811512	0		7.0326			796	0.866025	1.86603	4.58548	1.52849	2.83913	1.13565	7.42461	795.5	4.39629	1.46543	2.63628	1.05451	7.03257	1.53257
797	0.5	1.5	4.56125	1.52042	3.15918	1.26367	7.72042	796.5	4.57269	1.52423	3.01046	1.20419	7.58315	2.08315		0.295815	0		7.58317			797	0.5	1.5	4.56125	1.52041	3.15917	1.26367	7.72042	796.5	4.5727	1.52423	3.01046	1.20419	7.58315	2.08315
798	6.95852e-14	1	4.11868	1.37289	3.3026	1.32104	7.42128	797.5	4.32769	1.44256	3.24787	1.29915	7.57556	2.07556		-0.299146	0		7.57556			798	6.95852e-14	1	4.11869	1.37289	3.30259	1.32104	7.42128	797.5	4.3277	1.44256	3.24786	1.29915	7.57556	2.07556
799	-0.5	0.5	3.37637	1.12546	3.23096	1.29238	6.60733	798.5	3.72694	1.24231	3.28488	1.31395	7.01182	1.51182		-0.813951	0		7.01181			799	-0.5	0.5	3.37638	1.12546	3.23095	1.29238	6.60733	798.5	3.72695	1.24231	3.28487	1.31395	7.01182	1.51182
800	-0.866025	0.133975	2.53321	0.844402	2.96346	1.18538	5.49667	799.5	2.93141	0.977136	3.11158	1.24463	6.04299	0.542991		-1.11066	4.44089e-16		6.04297			800	-0.866025	0.133975	2.53321	0.844403	2.96346	1.18538	5.49667	799.5	2.93142	0.977137	3.11157	1.24463	6.04299	0.542991
801	-1	0	1.81512	0.60504	2.57178	1.02871	4.3869	800.5	2.15425	0.718085	2.77441	1.10977	4.92867	-0.571333		-1.10977	2.22045e-16		4.92865			801	-1	0	1.81513	0.605041	2.57178	1.02871	4.3869	800.5	2.15426	0.718085	2.77441	1.10977	4.92867	-0.571333
802	-0.866025	0.133975	1.41452	0.471508	2.16087	0.864347	3.57539	801.5	1.60372	0.534572	2.36372	0.945487	3.96743	-1.53257		-0.811512	-3.33067e-16		3.96743			802	-0.866025	0.133975	1.41453	0.471509	2.16086	0.864347	3.57539	801.5	1.60372	0.534573	2.36371	0.945487	3.96743	-1.53257
803	-0.5	0.5	1.43875	0.479585	1.84082	0.736329	3.27958	802.5	1.42731	0.47577	1.98954	0.795815	3.41685	-2.08315		-0.295815	0		3.41686			803	-0.5	0.5	1.43876	0.479585	1.84082	0.736329	3.27958	802.5	1.42732	0.475771	1.98953	0.795814	3.41685	-2.08315
804	-2.35224e-14	1	1.88132	0.627106	1.6974	0.678962	3.57872	803.5	1.67231	0.557436	1.75213	0.700854	3.42444	-2.07556		0.299146	0		3.42446			804	-2.35224e-14	1	1.88132	0.627106	1.6974	0.678962	3.57872	803.5	1.67231	0.557436	1.75213	0.700854	3.42444	-2.07556
805	0.5	1.5	2.62363	0.874544	1.76904	0.707616	4.39267	804.5	2.27306	0.757686	1.71512	0.686049	3.98818	-1.51182		0.813951	0		3.98821			805	0.5	1.5	2.62364	0.874544	1.76904	0.707616	4.39267	804.5	2.27306	0.757686	1.71512	0.686049	3.98818	-1.51182
806	0.866025	1.86603	3.46679	1.1556	2.03654	0.814615	5.50333	805.5	3.06859	1.02286	1.88842	0.755367	4.95701	-0.542991		1.11066	0		4.95705			806	0.866025	1.86603	3.4668	1.1556	2.03653	0.814615	5.50333	805.5	3.0686	1.02286	1.88841	0.755367	4.95701	-0.542991
807	1	2	4.18488	1.39496	2.42822	0.971287	6.6131	806.5	3.84575	1.28192	2.22559	0.890235	6.07133	0.571333		1.10977	0		6.07137			807	1	2	4.18488	1.39496	2.42821	0.971287	6.6131	806.5	3.84575	1.28191	2.22558	0.890235	6.07133	0.571333
808	0.866025	1.86603	4.58548	1.52849	2.83913	1.13565	7.42461	807.5	4.39628	1.46543	2.63628	1.05451	7.03257	1.53257		0.811512	0		7.0326			808	0.866025	1.86603	4.58548	1.52849	2.83913	1.13565	7.42461	807.5	4.39629	1.46543	2.63628	1.05451	7.03257	1.53257
809	0.5	1.5	4.56125	1.52042	3.15918	1.26367	7.72042	808.5	4.57269	1.52423	3.01046	1.20419	7.58315	2.08315		0.295815	0		7.58317			809	0.5	1.5	4.56125	1.52041	3.15917	1.26367	7.72042	808.5	4.5727	1.52423	3.01046	1.20419	7.58315	2.08315
810	3.43031e-14	1	4.11868	1.37289	3.3026	1.32104	7.42128	809.5	4.32769	1.44256	3.24787	1.29915	7.57556	2.07556		-0.299146	0		7.57556			810	3.43031e-14	1	4.11869	1.37289	3.30259	1.32104	7.42128	809.5	4.3277	1.44256	3.24786	1.29915	7.57556	2.07556
811	-0.5	0.5	3.37637	1.12546	3.23096	1.29238	6.60733	810.5	3.72694	1.24231	3.28488	1.31395	7.01182	1.51182		-0.813951	0		7.01181			811	-0.5	0.5	3.37638	1.12546	3.23095	1.29238	6.60733	810.5	3.72695	1.24231	3.28487	1.31395	7.01182	1.51182
812	-0.866025	0.133975	2.53321	0.844402	2.96346	1.18538	5.49667	811.5	2.93141	0.977136	3.11158	1.24463	6.04299	0.542991		-1.11066	-2.22045e-16		6.04297			812	-0.866025	0.133975	2.53321	0.844403	2.96346	1.18538	5.49667	811.5	2.93142	0.977137	3.11157	1.24463	6.04299	0.542991
813	-1	0	1.81512	0.60504	2.57178	1.02871	4.3869	812.5	2.15425	0.718085	2.77441	1.10977	4.92867	-0.571333		-1.10977	0		4.92865			813	-1	0	1.81513	0.605041	2.57178	1.02871	4.3869	812.5	2.15426	0.718085	2.77441	1.10977	4.92867	-0.571333
814	-0.866025	0.133975	1.41452	0.471508	2.16087	0.864347	3.57539	813.5	1.60372	0.534572	2.36372	0.945487	3.96743	-1.53257		-0.811512	-3.33067e-16		3.96743			814	-0.866025	0.133975	1.41453	0.471509	2.16086	0.864347	3.57539	813.5	1.60372	0.534573	2.36371	0.945487	3.96743	-1.53257
815	-0.5	0.5	1.43875	0.479585	1.84082	0.736329	3.27958	814.5	1.42731	0.47577	1.98954	0.795815	3.41685	-2.08315		-0.295815	0		3.41686			815	-0.5	0.5	1.43876	0.479585	1.84082	0.736329	3.27958	814.5	1.42732	0.475771	1.98953	0.795814	3.41685	-2.08315
816	-4.50837e-14	1	1.88132	0.627106	1.6974	0.678962	3.57872	815.5	1.67231	0.557436	1.75213	0.700854	3.42444	-2.07556		0.299146	0		3.42446			816	-4.50837e-14	1	1.88132	0.627106	1.6974	0.678962	3.57872	815.5	1.67231	0.557436	1.75213	0.700854	3.42444	-2.07556
817	0.5	1.5	2.62363	0.874544	1.76904	0.707616	4.39267	816.5	2.27306	0.757686	1.71512	0.686049	3.98818	-1.51182		0.813951	0		3.98821			817	0.5	1.5	2.62364	0.874544	1.76904	0.707616	4.39267	816.5	2.27306	0.757686	1.71512	0.686049	3.98818	-1.51182
818	0.866025	1.86603	3.46679	1.1556	2.03654	0.814615	5.50333	817.5	3.06859	1.02286	1.88842	0.755367	4.95701	-0.542991		1.11066	0		4.95705			818	0.866025	1.86603	3.4668	1.1556	2.03653	0.814615	5.50333	817.5	3.0686	1.02286	1.88841	0.755367	4.95701	-0.542991
819	1	2	4.18488	1.39496	2.42822	0.971287	6.6131	818.5	3.84575	1.28192	2.22559	0.890235	6.07133	0.571333		1.10977	0		6.07137			819	1	2	4.18488	1.39496	2.42821	0.971287	6.6131	818.5	3.84575	1.28191	2.22558	0.890235	6.07133	0.571333
820	0.866025	1.86603	4.58548	1.52849	2.83913	1.13565	7.42461	819.5	4.39628	1.46543	2.63628	1.05451	7.03257	1.53257		0.811512	0		7.0326			820	0.866025	1.86603	4.58548	1.52849	2.83913	1.13565	7.42461	819.5	4.39629	1.46543	2.63628	1.05451	7.03257	1.53257
821	0.5	1.5	4.56125	1.52042	3.15918	1.26367	7.72042	820.5	4.57269	1.52423	3.01046	1.20419	7.58315	2.08315		0.295815	0		7.58317			821	0.5	1.5	4.56125	1.52041	3.15917	1.26367	7.72042	820.5	4.5727	1.52423	3.01046	1.20419	7.58315	2.08315
822	5.58644e-14	1	4.11868	1.37289	3.3026	1.32104	7.42128	821.5	4.32769	1.44256	3.24787	1.29915	7.57556	2.07556		-0.299146	0		7.57556			822	5.58644e-14	1	4.11869	1.37289	3.30259	1.32104	7.42128	821.5	4.3277	1.44256	3.24786	1.29915	7.57556	2.07556
823	-0.5	0.5	3.37637	1.12546	3.23096	1.29238	6.60733	822.5	3.72694	1.24231	3.28488	1.31395	7.01182	1.51182		-0.813951	0		7.01181			823	-0.5	0.5	3.37638	1.12546	3.23095	1.29238	6.60733	822.5	3.72695	1.24231	3.28487	1.31395	7.01182	1.51182
824	-0.866025	0.133975	2.53321	0.844402	2.96346	1.18538	5.49667	823.5	2.93141	0.977136	3.11158	1.24463	6.04299	0.542991		-1.11066	7.77156e-16		6.04297			824	-0.866025	0.133975	2.53321	0.844403	2.96346	1.18538	5.49667	823.5	2.93142	0.977137	3.11157	1.24463	6.04299	0.542991
825	-1	0	1.81512	0.60504	2.57178	1.02871	4.3869	824.5	2.15425	0.718085	2.77441	1.10977	4.92867	-0.571333		-1.10977	-8.88178e-16		4.92865			825	-1	0	1.81513	0.605041	2.57178	1.02871	4.3869	824.5	2.15426	0.718085	2.77441	1.10977	4.92867	-0.571333
826	-0.866025	0.133975	1.41452	0.471508	2.16087	0.864347	3.57539	825.5	1.60372	0.534572	2.36372	0.945487	3.96743	-1.53257		-0.811512	5.55112e-16		3.96743			826	-0.866025	0.133975	1.41453	0.471509	2.16086	0.864347	3.57539	825.5	1.60372	0.534573	2.36371	0.945487	3.96743	-1.53257
827	-0.5	0.5	1.43875	0.479585	1.84082	0.736329	3.27958	826.5	1.42731	0.47577	1.98954	0.795815	3.41685	-2.08315		-0.295815	0		3.41686			827	-0.5	0.5	1.43876	0.479585	1.84082	0.736329	3.27958	826.5	1.42732	0.475771	1.98953	0.795814	3.41685	-2.08315
828	-6.6645e-14	1	1.88132	0.627106	1.6974	0.678962	3.57872	827.5	1.67231	0.557436	1.75213	0.700854	3.42444	-2.07556		0.299146	0		3.42446			828	-6.6645e-14	1	1.88132	0.627106	1.6974	0.678962	3.57872	827.5	1.67231	0.557436	1.75213	0.700854	3.42444	-2.07556
829	0.5	1.5	2.62363	0.874544	1.76904	0.707616	4.39267	828.5	2.27306	0.757686	1.71512	0.686049	3.98818	-1.51182		0.813951	0		3.98821			829	0.5	1.5	2.62364	0.874544	1.76904	0.707616	4.39267	828.5	2.27306	0.757686	1.71512	0.686049	3.98818	-1.51182
830	0.866025	1.86603	3.46679	1.1556	2.03654	0.814615	5.50333	829.5	3.06859	1.02286	1.88842	0.755367	4.95701	-0.542991		1.11066	0		4.95705			830	0.866025	1.86603	3.4668	1.1556	2.03653	0.814615	5.50333	829.5	3.0686	1.02286	1.88841	0.755367	4.95701	-0.542991
831	1	2	4.18488	1.39496	2.42822	0.971287	6.6131	830.5	3.84575	1.28192	2.22559	0.890235	6.07133	0.571333		1.10977	0		6.07137			831	1	2	4.18488	1.39496	2.42821	0.971287	6.6131	830.5	3.84575	1.28191	2.22558	0.890235	6.07133	0.571333
832	0.866025	1.86603	4.58548	1.52849	2.83913	1.13565	7.42461	831.5	4.39628	1.46543	2.63628	1.05451	7.03257	1.53257		0.811512	0		7.0326			832	0.866025	1.86603	4.58548	1.52849	2.83913	1.13565	7.42461	831.5	4.39629	1.46543	2.63628	1.05451	7.03257	1.53257
833	0.5	1.5	4.56125	1.52042	3.15918	1.26367	7.72042	832.5	4.57269	1.52423	3.01046	1.20419	7.58315	2.08315		0.295815	0		7.58317			833	0.5	1.5	4.56125	1.52041	3.15917	1.26367	7.72042	832.5	4.5727	1.52423	3.01046	1.20419	7.58315	2.08315
834	2.05823e-14	1	4.11868	1.37289	3.3026	1.32104	7.42128	833.5	4.32769	1.44256	3.24787	1.29915	7.57556	2.07556		-0.299146	0		7.57556			834	2.05823e-14	1	4.11869	1.37289	3.30259	1.32104	7.42128	833.5	4.3277	1.44256	3.24786	1.29915	7.57556	2.07556
835	-0.5	0.5	3.37637	1.12546	3.23096	1.29238	6.60733	834.5	3.72694	1.24231	3.28488	1.31395	7.01182	1.51182		-0.813951	0		7.01181			835	-0.5	0.5	3.37638	1.12546	3.23095	1.29238	6.60733	834.5	3.72695	1.24231	3.28487	1.31395	7.01182	1.51182
836	-0.866025	0.133975	2.53321	0.844402	2.96346	1.18538	5.49667	835.5	2.93141	0.977136	3.11158	1.24463	6.04299	0.542991		-1.11066	-6.66134e-16		6.04297			836	-0.866025	0.133975	2.53321	0.844403	2.96346	1.18538	5.49667	835.5	2.93142	0.977137	3.11157	1.24463	6.04299	0.542991
837	-1	0	1.81512	0.60504	2.57178	1.02871	4.3869	836.5	2.15425	0.718085	2.77441	1.10977	4.92867	-0.571333		-1.10977	-4.44089e-16		4.92865			837	-1	0	1.81513	0.605041	2.57178	1.02871	4.3869	836.5	2.15426	0.718085	2.77441	1.10977	4.92867	-0.571333
838	-0.866025	0.133975	1.41452	0.471508	2.16087	0.864347	3.57539	837.5	1.60372	0.534572	2.36372	0.945487	3.96743	-1.53257		-0.811512	4.44089e-16		3.96743			838	-0.866025	0.133975	1.41453	0.471509	2.16086	0.864347	3.57539	837.5	1.60372	0.534573	2.36371	0.945487	3.96743	-1.53257
839	-0.5	0.5	1.43875	0.479585	1.84082	0.736329	3.27958	838.5	1.42731	0.47577	1.98954	0.795815	3.41685	-2.08315		-0.295815	0		3.41686			839	-0.5	0.5	1.43876	0.479585	1.84082	0.736329	3.27958	838.5	1.42732	0.475771	1.98953	0.795814	3.41685	-2.08315
840	-3.13629e-14	1	1.88132	0.627106	1.6974	0.678962	3.57872	839.5	1.67231	0.557436	1.75213	0.700854	3.42444	-2.07556		0.299146	0		3.42446			840	-3.13629e-14	1	1.88132	0.627106	1.6974	0.678962	3.57872	839.5	1.67231	0.557436	1.75213	0.700854	3.42444	-2.07556
841	0.5	1.5	2.62363	0.874544	1.76904	0.707616	4.39267	840.5	2.27306	0.757686	1.71512	0.686049	3.98818	-1.51182		0.813951	0		3.98821			841	0.5	1.5	2.62364	0.874544	1.76904	0.707616	4.39267	840.5	2.27306	0.757686	1.71512	0.686049	3.98818	-1.51182
842	0.866025	1.86603	3.46679	1.1556	2.03654	0.814615	5.50333	841.5	3.06859	1.02286	1.88842	0.755367	4.95701	-0.542991		1.11066	0		4.95705			842	0.866025	1.86603	3.4668	1.1556	2.03653	0.814615	5.50333	841.5	3.0686	1.02286	1.88841	0.755367	4.95701	-0.542991
843	1	2	4.18488	1.39496	2.42822	0.971287	6.6131	842.5	3.84575	1.28192	2.22559	0.890235	6.07133	0.571333		1.10977	0		6.07137			843	1	2	4.18488	1.39496	2.42821	0.971287	6.6131	842.5	3.84575	1.28191	2.22558	0.890235	6.07133	0.571333
844	0.866025	1.86603	4.58548	1.52849	2.83913	1.13565	7.42461	843.5	4.39628	1.46543	2.63628	1.05451	7.03257	1.53257		0.811512	0		7.0326			844	0.866025	1.86603	4.58548	1.52849	2.83913	1.13565	7.42461	843.5	4.39629	1.46543	2.63628	1.05451	7.03257	1.53257
845	0.5	1.5	4.56125	1.52042	3.15918	1.26367	7.72042	844.5	4.57269	1.52423	3.01046	1.20419	7.58315	2.08315		0.295815	0		7.58317			845	0.5	1.5	4.56125	1.52041	3.15917	1.26367	7.72042	844.5	4.5727	1.52423	3.01046	1.20419	7.58315	2.08315
846	4.21436e-14	1	4.11868	1.37289	3.3026	1.32104	7.42128	845.5	4.32769	1.44256	3.24787	1.29915	7.57556	2.07556		-0.299146	0		7.57556			846	4.21436e-14	1	4.11869	1.37289	3.30259	1.32104	7.42128	845.5	4.3277	1.44256	3.24786	1.29915	7.57556	2.07556
847	-0.5	0.5	3.37637	1.12546	3.23096	1.29238	6.60733	846.5	3.72694	1.24231	3.28488	1.31395	7.01182	1.51182		-0.813951	0		7.01181			847	-0.5	0.5	3.37638	1.12546	3.23095	1.29238	6.60733	846.5	3.72695	1.24231	3.28487	1.31395	7.01182	1.51182
848	-0.866025	0.133975	2.53321	0.844402	2.96346	1.18538	5.49667	847.5	2.93141	0.977136	3.11158	1.24463	6.04299	0.542991		-1.11066	0		6.04297			848	-0.866025	0.133975	2.53321	0.844403	2.96346	1.18538	5.49667	847.5	2.93142	0.977137	3.11157	1.24463	6.04299	0.542991
849	-1	0	1.81512	0.60504	2.57178	1.02871	4.3869	848.5	2.15425	0.718085	2.77441	1.10977	4.92867	-0.571333		-1.10977	4.44089e-16		4.92865			849	-1	0	1.81513	0.605041	2.57178	1.02871	4.3869	848.5	2.15426	0.718085	2.77441	1.10977	4.92867	-0.571333
850	-0.866025	0.133975	1.41452	0.471508	2.16087	0.864347	3.57539	849.5	1.60372	0.534572	2.36372	0.945487	3.96743	-1.53257		-0.811512	-5.55112e-16		3.96743			850	-0.866025	0.133975	1.41453	0.471509	2.16086	0.864347	3.57539	849.5	1.60372	0.534573	2.36371	0.945487	3.96743	-1.53257
851	-0.5	0.5	1.43875	0.479585	1.84082	0.736329	3.27958	850.5	1.42731	0.47577	1.98954	0.795815	3.41685	-2.08315		-0.295815	0		3.41686			851	-0.5	0.5	1.43876	0.479585	1.84082	0.736329	3.27958	850.5	1.42732	0.475771	1.98953	0.795814	3.41685	-2.08315
852	-5.29242e-14	1	1.88132	0.627106	1.6974	0.678962	3.57872	851.5	1.67231	0.557436	1.75213	0.700854	3.42444	-2.07556		0.299146	0		3.42446			852	-5.29242e-14	1	1.88132	0.627106	1.6974	0.678962	3.57872	851.5	1.67231	0.557436	1.75213	0.700854	3.42444	-2.07556
853	0.5	1.5	2.62363	0.874544	1.76904	0.707616	4.39267	852.5	2.27306	0.757686	1.71512	0.686049	3.98818	-1.51182		0.813951	0		3.98821			853	0.5	1.5	2.62364	0.874544	1.76904	0.707616	4.39267	852.5	2.27306	0.757686	1.71512	0.686049	3.98818	-1.51182
854	0.866025	1.86603	3.46679	1.1556	2.03654	0.814615	5.50333	853.5	3.06859	1.02286	1.88842	0.755367	4.95701	-0.542991		1.11066	0		4.95705			854	0.866025	1.86603	3.4668	1.1556	2.03653	0.814615	5.50333	853.5	3.0686	1.02286	1.88841	0.755367	4.95701	-0.542991
855	1	2	4.18488	1.39496	2.42822	0.971287	6.6131	854.5	3.84575	1.28192	2.22559	0.890235	6.07133	0.571333		1.10977	0		6.07137			855	1	2	4.18488	1.39496	2.42821	0.971287	6.6131	854.5	3.84575	1.28191	2.22558	0.890235	6.07133	0.571333
856	0.866025	1.86603	4.58548	1.52849	2.83913	1.13565	7.42461	855.5	4.39628	1.46543	2.63628	1.05451	7.03257	1.53257		0.811512	0		7.0326			856	0.866025	1.86603	4.58548	1.52849	2.83913	1.13565	7.42461	855.5	4.39629	1.46543	2.63628	1.05451	7.03257	1.53257
857	0.5	1.5	4.56125	1.52042	3.15918	1.26367	7.72042	856.5	4.57269	1.52423	3.01046	1.20419	7.58315	2.08315		0.295815	0		7.58317			857	0.5	1.5	4.56125	1.52041	3.15917	1.26367	7.72042	856.5	4.5727	1.52423	3.01046	1.20419	7.58315	2.08315
858	6.37049e-14	1	4.11868	1.37289	3.3026	1.32104	7.42128	857.5	4.32769	1.44256	3.24787	1.29915	7.57556	2.07556		-0.299146	0		7.57556			858	6.37049e-14	1	4.11869	1.37289	3.30259	1.32104	7.42128	857.5	4.3277	1.44256	3.24786	1.29915	7.57556	2.07556
859	-0.5	0.5	3.37637	1.12546	3.23096	1.29238	6.60733	858.5	3.72694	1.24231	3.28488	1.31395	7.01182	1.51182		-0.813951	9.99201e-16		7.01181			859	-0.5	0.5	3.37638	1.12546	3.23095	1.29238	6.60733	858.5	3.72695	1.24231	3.28487	1.31395	7.01182	1.51182
860	-0.866025	0.133975	2.53321	0.844402	2.96346	1.18538	5.49667	859.5	2.93141	0.977136	3.11158	1.24463	6.04299	0.542991		-1.11066	-4.44089e-16		6.04297			860	-0.866025	0.133975	2.53321	0.844403	2.96346	1.18538	5.49667	859.5	2.93142	0.977137	3.11157	1.24463	6.04299	0.542991
861	-1	0	1.81512	0.60504	2.57178	1.02871	4.3869	860.5	2.15425	0.718085	2.77441	1.10977	4.92867	-0.571333		-1.10977	2.22045e-16		4.92865			861	-1	0	1.81513	0.605041	2.57178	1.02871	4.3869	860.5	2.15426	0.718085	2.77441	1.10977	4.92867	-0.571333
862	-0.866025	0.133975	1.41452	0.471508	2.16087	0.864347	3.57539	861.5	1.60372	0.534572	2.36372	0.945487	3.96743	-1.53257		-0.811512	-2.22045e-16		3.96743			862	-0.866025	0.133975	1.41453	0.471509	2.16086	0.864347	3.57539	861.5	1.60372	0.534573	2.36371	0.945487	3.96743	-1.53257
863	-0.5	0.5	1.43875	0.479585	1.84082	0.736329	3.27958	862.5	1.42731	0.47577	1.98954	0.795815	3.41685	-2.08315		-0.295815	-6.66134e-16		3.41686			863	-0.5	0.5	1.43876	0.479585	1.84082	0.736329	3.27958	862.5	1.42732	0.475771	1.98953	0.795814	3.41685	-2.08315
864	-7.44856e-14	1	1.88132	0.627106	1.6974	0.678962	3.57872	863.5	1.67231	0.557436	1.75213	0.700854	3.42444	-2.07556		0.299146	0		3.42446			864	-7.44856e-14	1	1.88132	0.627106	1.6974	0.678962	3.57872	863.5	1.67231	0.557436	1.75213	0.700854	3.42444	-2.07556
865	0.5	1.5	2.62363	0.874544	1.76904	0.707616	4.39267	864.5	2.27306	0.757686	1.71512	0.686049	3.98818	-1.51182		0.813951	0		3.98821			865	0.5	1.5	2.62364	0.874544	1.76904	0.707616	4.39267	864.5	2.27306	0.757686	1.71512	0.686049	3.98818	-1.51182
866	0.866025	1.86603	3.46679	1.1556	2.03654	0.814615	5.50333	865.5	3.06859	1.02286	1.88842	0.755367	4.95701	-0.542991		1.11066	0		4.95705			866	0.866025	1.86603	3.4668	1.1556	2.03653	0.814615	5.50333	865.5	3.0686	1.02286	1.88841	0.755367	4.95701	-0.542991
867	1	2	4.18488	1.39496	2.42822	0.971287	6.6131	866.5	3.84575	1.28192	2.22559	0.890235	6.07133	0.571333		1.10977	0		6.07137			867	1	2	4.18488	1.39496	2.42821	0.971287	6.6131	866.5	3.84575	1.28191	2.22558	0.890235	6.07133	0.571333
868	0.866025	1.86603	4.58548	1.52849	2.83913	1.13565	7.42461	867.5	4.39628	1.46543	2.63628	1.05451	7.03257	1.53257		0.811512	0		7.0326			868	0.866025	1.86603	4.58548	1.52849	2.83913	1.13565	7.42461	867.5	4.39629	1.46543	2.63628	1.05451	7.03257	1.53257
869	0.5	1.5	4.56125	1.52042	3.15918	1.26367	7.72042	868.5	4.57269	1.52423	3.01046	1.20419	7.58315	2.08315		0.295815	0		7.58317			869	0.5	1.5	4.56125	1.52041	3.15917	1.26367	7.72042	868.5	4.5727	1.52423	3.01046	1.20419	7.58315	2.08315
870	2.84228e-14	1	4.11868	1.37289	3.3026	1.32104	7.42128	869.5	4.32769	1.44256	3.24787	1.29915	7.57556	2.07556		-0.299146	0		7.57556			870	2.84228e-14	1	4.11869	1.37289	3.30259	1.32104	7.42128	869.5	4.3277	1.44256	3.24786	1.29915	7.57556	2.07556
871	-0.5	0.5	3.37637	1.12546	3.23096	1.29238	6.60733	870.5	3.72694	1.24231	3.28488	1.31395	7.01182	1.51182		-0.813951	0		7.01181			871	-0.5	0.5	3.37638	1.12546	3.23095	1.29238	6.60733	870.5	3.72695	1.24231	3.28487	1.31395	7.01182	1.51182
872	-0.866025	0.133975	2.53321	0.844402	2.96346	1.18538	5.49667	871.5	2.93141	0.977136	3.11158	1.24463	6.04299	0.542991		-1.11066	0		6.04297			872	-0.866025	0.133975	2.53321	0.844403	2.96346	1.18538	5.49667	871.5	2.93142	0.977137	3.11157	1.24463	6.04299	0.542991
873	-1	0	1.81512	0.60504	2.57178	1.02871	4.3869	872.5	2.15425	0.718085	2.77441	1.10977	4.92867	-0.571333		-1.10977	2.22045e-16		4.92865			873	-1	0	1.81513	0.605041	2.57178	1.02871	4.3869	872.5	2.15426	0.718085	2.77441	1.10977	4.92867	-0.571333
874	-0.866025	0.133975	1.41452	0.471508	2.16087	0.864347	3.57539	873.5	1.60372	0.534572	2.36372	0.945487	3.96743	-1.53257		-0.811512	3.33067e-16		3.96743			874	-0.866025	0.133975	1.41453	0.471509	2.16086	0.864347	3.57539	873.5	1.60372	0.534573	2.36371	0.945487	3.96743	-1.53257
875	-0.5	0.5	1.43875	0.479585	1.84082	0.736329	3.27958	874.5	1.42731	0.47577	1.98954	0.795815	3.41685	-2.08315		-0.295815	0		3.41686			875	-0.5	0.5	1.43876	0.479585	1.84082	0.736329	3.27958	874.5	1.42732	0.475771	1.98953	0.795814	3.41685	-2.08315
876	-3.92034e-14	1	1.88132	0.627106	1.6974	0.678962	3.57872	875.5	1.67231	0.557436	1.75213	0.700854	3.42444	-2.07556		0.299146	0		3.42446			876	-3.92034e-14	1	1.88132	0.627106	1.6974	0.678962	3.57872	875.5	1.67231	0.557436	1.75213	0.700854	3.42444	-2.07556
877	0.5	1.5	2.62363	0.874544	1.76904	0.707616	4.39267	876.5	2.27306	0.757686	1.71512	0.686049	3.98818	-1.51182		0.813951	0		3.98821			877	0.5	1.5	2.62364	0.874544	1.76904	0.707616	4.39267	876.5	2.27306	0.757686	1.71512	0.686049	3.98818	-1.51182
878	0.866025	1.86603	3.46679	1.1556	2.03654	0.814615	5.50333	877.5	3.06859	1.02286	1.88842	0.755367	4.95701	-0.542991		1.11066	0		4.95705			878	0.866025	1.86603	3.4668	1.1556	2.03653	0.814615	5.50333	877.5	3.0686	1.02286	1.88841	0.755367	4.95701	-0.542991
879	1	2	4.18488	1.39496	2.42822	0.971287	6.6131	878.5	3.84575	1.28192	2.22559	0.890235	6.07133	0.571333		1.10977	0		6.07137			879	1	2	4.18488	1.39496	2.42821	0.971287	6.6131	878.5	3.84575	1.28191	2.22558	0.890235	6.07133	0.571333
880	0.866025	1.86603	4.58548	1.52849	2.83913	1.13565	7.42461	879.5	4.39628	1.46543	2.63628	1.05451	7.03257	1.53257		0.811512	0		7.0326			880	0.866025	1.86603	4.58548	1.52849	2.83913	1.13565	7.42461	879.5	4.39629	1.46543	2.63628	1.05451	7.03257	1.53257
881	0.5	1.5	4.56125	1.52042	3.15918	1.26367	7.72042	880.5	4.57269	1.52423	3.01046	1.20419	7.58315	2.08315		0.295815	0		7.58317			881	0.5	1.5	4.56125	1.52041	3.15917	1.26367	7.72042	880.5	4.5727	1.52423	3.01046	1.20419	7.58315	2.08315
882	4.99841e-14	1	4.11868	1.37289	3.3026	1.32104	7.42128	881.5	4.32769	1.44256	3.24787	1.29915	7.57556	2.07556		-0.299146	0		7.57556			882	4.99841e-14	1	4.11869	1.37289	3.30259	1.32104	7.42128	881.5	4.3277	1.44256	3.24786	1.29915	7.57556	2.07556
883	-0.5	0.5	3.37637	1.12546	3.23096	1.29238	6.60733	882.5	3.72694	1.24231	3.28488	1.31395	7.01182	1.51182		-0.813951	0		7.01181			883	-0.5	0.5	3.37638	1.12546	3.23095	1.29238	6.60733	882.5	3.72695	1.24231	3.28487	1.31395	7.01182	1.51182
884	-0.866025	0.133975	2.53321	0.844402	2.96346	1.18538	5.49667	883.5	2.93141	0.977136	3.11158	1.24463	6.04299	0.542991		-1.11066	0		6.04297			884	-0.866025	0.133975	2.53321	0.844403	2.96346	1.18538	5.49667	883.5	2.93142	0.977137	3.11157	1.24463	6.04299	0.542991
885	-1	0	1.81512	0.60504	2.57178	1.02871	4.3869	884.5	2.15425	0.718085	2.77441	1.10977	4.92867	-0.571333		-1.10977	4.44089e-16		4.92865			885	-1	0	1.81513	0.605041	2.57178	1.02871	4.3869	884.5	2.15426	0.718085	2.77441	1.10977	4.92867	-0.571333
886	-0.866025	0.133975	1.41452	0.471508	2.16087	0.864347	3.57539	885.5	1.60372	0.534572	2.36372	0.945487	3.96743	-1.53257		-0.811512	-3.33067e-16		3.96743			886	-0.866025	0.133975	1.41453	0.471509	2.16086	0.864347	3.57539	885.5	1.60372	0.534573	2.36371	0.945487	3.96743	-1.53257
887	-0.5	0.5	1.43875	0.479585	1.84082	0.736329	3.27958	886.5	1.42731	0.47577	1.98954	0.795815	3.41685	-2.08315		-0.295815	0		3.41686			887	-0.5	0.5	1.43876	0.479585	1.84082	0.736329	3.27958	886.5	1.42732	0.475771	1.98953	0.795814	3.41685	-2.08315
888	-6.07648e-14	1	1.88132	0.627106	1.6974	0.678962	3.57872	887.5	1.67231	0.557436	1.75213	0.700854	3.42444	-2.07556		0.299146	0		3.42446			888	-6.07648e-14	1	1.88132	0.627106	1.6974	0.678962	3.57872	887.5	1.67231	0.557436	1.75213	0.700854	3.42444	-2.07556
889	0.5	1.5	2.62363	0.874544	1.76904	0.707616	4.39267	888.5	2.27306	0.757686	1.71512	0.686049	3.98818	-1.51182		0.813951	0		3.98821			889	0.5	1.5	2.62364	0.874544	1.76904	0.707616	4.39267	888.5	2.27306	0.757686	1.71512	0.686049	3.98818	-1.51182
890	0.866025	1.86603	3.46679	1.1556	2.03654	0.814615	5.50333	889.5	3.06859	1.02286	1.88842	0.755367	4.95701	-0.542991		1.11066	0		4.95705			890	0.866025	1.86603	3.4668	1.1556	2.03653	0.814615	5.50333	889.5	3.0686	1.02286	1.88841	0.755367	4.95701	-0.542991
891	1	2	4.18488	1.39496	2.42822	0.971287	6.6131	890.5	3.84575	1.28192	2.22559	0.890235	6.07133	0.571333		1.10977	0		6.07137			891	1	2	4.18488	1.39496	2.42821	0.971287	6.6131	890.5	3.84575	1.28191	2.22558	0.890235	6.07133	0.571333
892	0.866025	1.86603	4.58548	1.52849	2.83913	1.13565	7.42461	891.5	4.39628	1.46543	2.63628	1.05451	7.03257	1.53257		0.811512	0		7.0326			892	0.866025	1.86603	4.58548	1.52849	2.83913	1.13565	7.42461	891.5	4.39629	1.46543	2.63628	1.05451	7.03257	1.53257
893	0.5	1.5	4.56125	1.52042	3.15918	1.26367	7.72042	892.5	4.57269	1.52423	3.01046	1.20419	7.58315	2.08315		0.295815	0		7.58317			893	0.5	1.5	4.56125	1.52041	3.15917	1.26367	7.72042	892.5	4.5727	1.52423	3.01046	1.20419	7.58315	2.08315
894	7.15454e-14	1	4.11868	1.37289	3.3026	1.32104	7.42128	893.5	4.32769	1.44256	3.24787	1.29915	7.57556	2.07556		-0.299146	0		7.57556			894	7.15454e-14	1	4.11869	1.37289	3.30259	1.32104	7.42128	893.5	4.3277	1.44256	3.24786	1.29915	7.57556	2.07556
895	-0.5	0.5	3.37637	1.12546	3.23096	1.29238	6.60733	894.5	3.72694	1.24231	3.28488	1.31395	7.01182	1.51182		-0.813951	-8.88178e-16		7.01181			895	-0.5	0.5	3.37638	1.12546	3.23095	1.29238	6.60733	894.5	3.72695	1.24231	3.28487	1.31395	7.01182	1.51182
896	-0.866025	0.133975	2.53321	0.844402	2.96346	1.18538	5.49667	895.5	2.93141	0.977136	3.11158	1.24463	6.04299	0.542991		-1.11066	3.33067e-16		6.04297			896	-0.866025	0.133975	2.53321	0.844403	2.96346	1.18538	5.49667	895.5	2.93142	0.977137	3.11157	1.24463	6.04299	0.542991
897	-1	0	1.81512	0.60504	2.57178	1.02871	4.3869	896.5	2.15425	0.718085	2.77441	1.10977	4.92867	-0.571333		-1.10977	-2.22045e-16		4.92865			897	-1	0	1.81513	0.605041	2.57178	1.02871	4.3869	896.5	2.15426	0.718085	2.77441	1.10977	4.92867	-0.571333
898	-0.866025	0.133975	1.41452	0.471508	2.16087	0.864347	3.57539	897.5	1.60372	0.534572	2.36372	0.945487	3.96743	-1.53257		-0.811512	-2.22045e-16		3.96743			898	-0.866025	0.133975	1.41453	0.471509	2.16086	0.864347	3.57539	897.5	1.60372	0.534573	2.36371	0.945487	3.96743	-1.53257
899	-0.5	0.5	1.43875	0.479585	1.84082	0.736329	3.27958	898.5	1.42731	0.47577	1.98954	0.795815	3.41685	-2.08315		-0.295815	-4.44089e-16		3.41686			899	-0.5	0.5	1.43876	0.479585	1.84082	0.736329	3.27958	898.5	1.42732	0.475771	1.98953	0.795814	3.41685	-2.08315
900	-2.54827e-14	1	1.88132	0.627106	1.6974	0.678962	3.57872	899.5	1.67231	0.557436	1.75213	0.700854	3.42444	-2.07556		0.299146	0		3.42446			900	-2.54827e-14	1	1.88132	0.627106	1.6974	0.678962	3.57872	899.5	1.67231	0.557436	1.75213	0.700854	3.42444	-2.07556
901	0.5	1.5	2.62363	0.874544	1.76904	0.707616	4.39267	900.5	2.27306	0.757686	1.71512	0.686049	3.98818	-1.51182		0.813951	0		3.98821			901	0.5	1.5	2.62364	0.874544	1.76904	0.707616	4.39267	900.5	2.27306	0.757686	1.71512	0.686049	3.98818	-1.51182
902	0.866025	1.86603	3.46679	1.1556	2.03654	0.814615	5.50333	901.5	3.06859	1.02286	1.88842	0.755367	4.95701	-0.542991		1.11066	0		4.95705			902	0.866025	1.86603	3.4668	1.1556	2.03653	0.814615	5.50333	901.5	3.0686	1.02286	1.88841	0.755367	4.95701	-0.542991
903	1	2	4.18488	1.39496	2.42822	0.971287	6.6131	902.5	3.84575	1.28192	2.22559	0.890235	6.07133	0.571333		1.10977	0		6.07137			903	1	2	4.18488	1.39496	2.42821	0.971287	6.6131	902.5	3.84575	1.28191	2.22558	0.890235	6.07133	0.571333
904	0.866025	1.86603	4.58548	1.52849	2.83913	1.13565	7.42461	903.5	4.39628	1.46543	2.63628	1.05451	7.03257	1.53257		0.811512	0		7.0326			904	0.866025	1.86603	4.58548	1.52849	2.83913	1.13565	7.42461	903.5	4.39629	1.46543	2.63628	1.05451	7.03257	1.53257
905	0.5	1.5	4.56125	1.52042	3.15918	1.26367	7.72042	904.5	4.57269	1.52423	3.01046	1.20419	7.58315	2.08315		0.295815	0		7.58317			905	0.5	1.5	4.56125	1.52041	3.15917	1.26367	7.72042	904.5	4.5727	1.52423	3.01046	1.20419	7.58315	2.08315
906	3.62633e-14	1	4.11868	1.37289	3.3026	1.32104	7.42128	905.5	4.32769	1.44256	3.24787	1.29915	7.57556	2.07556		-0.299146	0		7.57556			906	3.62633e-14	1	4.11869	1.37289	3.30259	1.32104	7.42128	905.5	4.3277	1.44256	3.24786	1.29915	7.57556	2.07556
907	-0.5	0.5	3.37637	1.12546	3.23096	1.29238	6.60733	906.5	3.72694	1.24231	3.28488	1.31395	7.01182	1.51182		-0.813951	0		7.01181			907	-0.5	0.5	3.37638	1.12546	3.23095	1.29238	6.60733	906.5	3.72695	1.24231	3.28487	1.31395	7.01182	1.51182
908	-0.866025	0.133975	2.53321	0.844402	2.96346	1.18538	5.49667	907.5	2.93141	0.977136	3.11158	1.24463	6.04299	0.542991		-1.11066	2.22045e-16		6.04297			908	-0.866025	0.133975	2.53321	0.844403	2.96346	1.18538	5.49667	907.5	2.93142	0.977137	3.11157	1.24463	6.04299	0.542991
909	-1	0	1.81512	0.60504	2.57178	1.02871	4.3869	908.5	2.15425	0.718085	2.77441	1.10977	4.92867	-0.571333		-1.10977	-4.44089e-16		4.92865			909	-1	0	1.81513	0.605041	2.57178	1.02871	4.3869	908.5	2.15426	0.718085	2.77441	1.10977	4.92867	-0.571333
910	-0.866025	0.133975	1.41452	0.471508	2.16087	0.864347	3.57539	909.5	1.60372	0.534572	2.36372	0.945487	3.96743	-1.53257		-0.811512	-5.55112e-16		3.96743			910	-0.866025	0.133975	1.41453	0.471509	2.16086	0.864347	3.57539	909.5	1.60372	0.534573	2.36371	0.945487	3.96743	-1.53257
911	-0.5	0.5	1.43875	0.479585	1.84082	0.736329	3.27958	910.5	1.42731	0.47577	1.98954	0.795815	3.41685	-2.08315		-0.295815	0		3.41686			911	-0.5	0.5	1.43876	0.479585	1.84082	0.736329	3.27958	910.5	1.42732	0.475771	1.98953	0.795814	3.41685	-2.08315
912	-4.7044e-14	1	1.88132	0.627106	1.6974	0.678962	3.57872	911.5	1.67231	0.557436	1.75213	0.700854	3.42444	-2.07556		0.299146	0		3.42446			912	-4.7044e-14	1	1.88132	0.627106	1.6974	0.678962	3.57872	911.5	1.67231	0.557436	1.75213	0.700854	3.42444	-2.07556
913	0.5	1.5	2.62363	0.874544	1.76904	0.707616	4.39267	912.5	2.27306	0.757686	1.71512	0.686049	3.98818	-1.51182		0.813951	0		3.98821			913	0.5	1.5	2.62364	0.874544	1.76904	0.707616	4.39267	912.5	2.27306	0.757686	1.71512	0.686049	3.98818	-1.51182
914	0.866025	1.86603	3.46679	1.1556	2.03654	0.814615	5.50333	913.5	3.06859	1.02286	1.88842	0.755367	4.95701	-0.542991		1.11066	0		4.95705			914	0.866025	1.86603	3.4668	1.1556	2.03653	0.814615	5.50333	913.5	3.0686	1.02286	1.88841	0.755367	4.95701	-0.542991
915	1	2	4.18488	1.39496	2.42822	0.971287	6.6131	914.5	3.84575	1.28192	2.22559	0.890235	6.07133	0.571333		1.10977	0		6.07137			915	1	2	4.18488	1.39496	2.42821	0.971287	6.6131	914.5	3.84575	1.28191	2.22558	0.890235	6.07133	0.571333
916	0.866025	1.86603	4.58548	1.52849	2.83913	1.13565	7.42461	915.5	4.39628	1.46543	2.63628	1.05451	7.03257	1.53257		0.811512	0		7.0326			916	0.866025	1.86603	4.58548	1.52849	2.83913	1.13565	7.42461	915.5	4.39629	1.46543	2.63628	1.05451	7.03257	1.53257
917	0.5	1.5	4.56125	1.52042	3.15918	1.26367	7.72042	916.5	4.57269	1.52423	3.01046	1.20419	7.58315	2.08315		0.295815	0		7.58317			917	0.5	1.5	4.56125	1.52041	3.15917	1.26367	7.72042	916.5	4.5727	1.52423	3.01046	1.20419	7.58315	2.08315
918	5.78246e-14	1	4.11868	1.37289	3.3026	1.32104	7.42128	917.5	4.32769	1.44256	3.24787	1.29915	7.57556	2.07556		-0.299146	0		7.57556			918	5.78246e-14	1	4.11869	1.37289	3.30259	1.32104	7.42128	917.5	4.3277	1.44256	3.24786	1.29915	7.57556	2.07556
919	-0.5	0.5	3.37637	1.12546	3.23096	1.29238	6.60733	918.5	3.72694	1.24231	3.28488	1.31395	7.01182	1.51182		-0.813951	0		7.01181			919	-0.5	0.5	3.37638	1.12546	3.23095	1.29238	6.60733	918.5	3.72695	1.24231	3.28487	1.31395	7.01182	1.51182
920	-0.866025	0.133975	2.53321	0.844402	2.96346	1.18538	5.49667	919.5	2.93141	0.977136	3.11158	1.24463	6.04299	0.542991		-1.11066	0		6.04297			920	-0.866025	0.133975	2.53321	0.844403	2.96346	1.18538	5.49667	919.5	2.93142	0.977137	3.11157	1.24463	6.04299	0.542991
921	-1	0	1.81512	0.60504	2.57178	1.02871	4.3869	920.5	2.15425	0.718085	2.77441	1.10977	4.92867	-0.571333		-1.10977	2.22045e-16		4.92865			921	-1	0	1.81513	0.605041	2.57178	1.02871	4.3869	920.5	2.15426	0.718085	2.77441	1.10977	4.92867	-0.571333
922	-0.866025	0.133975	1.41452	0.471508	2.16087	0.864347	3.57539	921.5	1.60372	0.534572	2.36372	0.945487	3.96743	-1.53257		-0.811512	-5.55112e-16		3.96743			922	-0.866025	0.133975	1.41453	0.471509	2.16086	0.864347	3.57539	921.5	1.60372	0.534573	2.36371	0.945487	3.96743	-1.53257
923	-0.5	0.5	1.43875	0.479585	1.84082	0.736329	3.27958	922.5	1.42731	0.47577	1.98954	0.795815	3.41685	-2.08315		-0.295815	0		3.41686			923	-0.5	0.5	1.43876	0.479585	1.84082	0.736329	3.27958	922.5	1.42732	0.475771	1.98953	0.795814	3.41685	-2.08315
924	-6.86053e-14	1	1.88132	0.627106	1.6974	0.678962	3.57872	923.5	1.67231	0.557436	1.75213	0.700854	3.42444	-2.07556		0.299146	0		3.42446			924	-6.86053e-14	1	1.88132	0.627106	1.6974	0.678962	3.57872	923.5	1.67231	0.557436	1.75213	0.700854	3.42444	-2.07556
925	0.5	1.5	2.62363	0.874544	1.76904	0.707616	4.39267	924.5	2.27306	0.757686	1.71512	0.686049	3.98818	-1.51182		0.813951	0		3.98821			925	0.5	1.5	2.62364	0.874544	1.76904	0.707616	4.39267	924.5	2.27306	0.757686	1.71512	0.686049	3.98818	-1.51182
926	0.866025	1.86603	3.46679	1.1556	2.03654	0.814615	5.50333	925.5	3.06859	1.02286	1.88842	0.755367	4.95701	-0.542991		1.11066	0		4.95705			926	0.866025	1.86603	3.4668	1.1556	2.03653	0.814615	5.50333	925.5	3.0686	1.02286	1.88841	0.755367	4.95701	-0.542991
927	1	2	4.18488	1.39496	2.42822	0.971287	6.6131	926.5	3.84575	1.28192	2.22559	0.890235	6.07133	0.571333		1.10977	0		6.07137			927	1	2	4.18488	1.39496	2.42821	0.971287	6.6131	926.5	3.84575	1.28191	2.22558	0.890235	6.07133	0.571333
928	0.866025	1.86603	4.58548	1.52849	2.83913	1.13565	7.42461	927.5	4.39628	1.46543	2.63628	1.05451	7.03257	1.53257		0.811512	0		7.0326			928	0.866025	1.86603	4.58548	1.52849	2.83913	1.13565	7.42461	927.5	4.39629	1.46543	2.63628	1.05451	7.03257	1.53257
929	0.5	1.5	4.56125	1.52042	3.15918	1.26367	7.72042	928.5	4.57269	1.52423	3.01046	1.20419	7.58315	2.08315		0.295815	0		7.58317			929	0.5	1.5	4.56125	1.52041	3.15917	1.26367	7.72042	928.5	4.5727	1.52423	3.01046	1.20419	7.58315	2.08315
930	7.93859e-14	1	4.11868	1.37289	3.3026	1.32104	7.42128	929.5	4.32769	1.44256	3.24787	1.29915	7.57556	2.07556		-0.299146	0		7.57556			930	7.93859e-14	1	4.11869	1.37289	3.30259	1.32104	7.42128	929.5	4.3277	1.44256	3.24786	1.29915	7.57556	2.07556
931	-0.5	0.5	3.37637	1.12546	3.23096	1.29238	6.60733	930.5	3.72694	1.24231	3.28488	1.31395	7.01182	1.51182		-0.813951	0		7.01181			931	-0.5	0.5	3.37638	1.12546	3.23095	1.29238	6.60733	930.5	3.72695	1.24231	3.28487	1.31395	7.01182	1.51182
932	-0.866025	0.133975	2.53321	0.844402	2.96346	1.18538	5.49667	931.5	2.93141	0.977136	3.11158	1.24463	6.04299	0.542991		-1.11066	-5.55112e-16		6.04297			932	-0.866025	0.133975	2.53321	0.844403	2.96346	1.18538	5.49667	931.5	2.93142	0.977137	3.11157	1.24463	6.04299	0.542991
933	-1	0	1.81512	0.60504	2.57178	1.02871	4.3869	932.5	2.15425	0.718085	2.77441	1.10977	4.92867	-0.571333		-1.10977	6.66134e-16		4.92865			933	-1	0	1.81513	0.605041	2.57178	1.02871	4.3869	932.5	2.15426	0.718085	2.77441	1.10977	4.92867	-0.571333
934	-0.866025	0.133975	1.41452	0.471508	2.16087	0.864347	3.57539	933.5	1.60372	0.534572	2.36372	0.945487	3.96743	-1.53257		-0.811512	0		3.96743			934	-0.866025	0.133975	1.41453	0.471509	2.16086	0.864347	3.57539	933.5	1.60372	0.534573	2.36371	0.945487	3.96743	-1.53257
935	-0.5	0.5	1.43875	0.479585	1.84082	0.736329	3.27958	934.5	1.42731	0.47577	1.98954	0.795815	3.41685	-2.08315		-0.295815	0		3.41686			935	-0.5	0.5	1.43876	0.479585	1.84082	0.736329	3.27958	934.5	1.42732	0.475771	1.98953	0.795814	3.41685	-2.08315
936	-3.33232e-14	1	1.88132	0.627106	1.6974	0.678962	3.57872	935.5	1.67231	0.557436	1.75213	0.700854	3.42444	-2.07556		0.299146	0		3.42446			936	-3.33232e-14	1	1.88132	0.627106	1.6974	0.678962	3.57872	935.5	1.67231	0.557436	1.75213	0.700854	3.42444	-2.07556
937	0.5	1.5	2.62363	0.874544	1.76904	0.707616	4.39267	936.5	2.27306	0.757686	1.71512	0.686049	3.98818	-1.51182		0.813951	0		3.98821			937	0.5	1.5	2.62364	0.874544	1.76904	0.707616	4.39267	936.5	2.27306	0.757686	1.71512	0.686049	3.98818	-1.51182
938	0.866025	1.86603	3.46679	1.1556	2.03654	0.814615	5.50333	937.5	3.06859	1.02286	1.88842	0.755367	4.95701	-0.542991		1.11066	0		4.95705			938	0.866025	1.86603	3.4668	1.1556	2.03653	0.814615	5.50333	937.5	3.0686	1.02286	1.88841	0.755367	4.95701	-0.542991
939	1	2	4.18488	1.39496	2.42822	0.971287	6.6131	938.5	3.84575	1.28192	2.22559	0.890235	6.07133	0.571333		1.10977	0		6.07137			939	1	2	4.18488	1.39496	2.42821	0.971287	6.6131	938.5	3.84575	1.28191	2.22558	0.890235	6.07133	0.571333
940	0.866025	1.86603	4.58548	1.52849	2.83913	1.13565	7.42461	939.5	4.39628	1.46543	2.63628	1.05451	7.03257	1.53257		0.811512	0		7.0326			940	0.866025	1.86603	4.58548	1.52849	2.83913	1.13565	7.42461	939.5	4.39629	1.46543	2.63628	1.05451	7.03257	1.53257
941	0.5	1.5	4.56125	1.52042	3.15918	1.26367	7.72042	940.5	4.57269	1.52423	3.01046	1.20419	7.58315	2.08315		0.295815	0		7.58317			941	0.5	1.5	4.56125	1.52041	3.15917	1.26367	7.72042	940.5	4.5727	1.52423	3.01046	1.20419	7.58315	2.08315
942	4.41038e-14	1	4.11868	1.37289	3.3026	1.32104	7.42128	941.5	4.32769	1.44256	3.24787	1.29915	7.57556	2.07556		-0.299146	0		7.57556			942	4.41038e-14	1	4.11869	1.37289	3.30259	1.32104	7.42128	941.5	4.3277	1.44256	3.24786	1.29915	7.57556	2.07556
943	-0.5	0.5	3.37637	1.12546	3.23096	1.29238	6.60733	942.5	3.72694	1.24231	3.28488	1.31395	7.01182	1.51182		-0.813951	0		7.01181			943	-0.5	0.5	3.37638	1.12546	3.23095	1.29238	6.60733	942.5	3.72695	1.24231	3.28487	1.31395	7.01182	1.51182
944	-0.866025	0.133975	2.53321	0.844402	2.96346	1.18538	5.49667	943.5	2.93141	0.977136	3.11158	1.24463	6.04299	0.542991		-1.11066	-1.11022e-15		6.04297			944	-0.866025	0.133975	2.53321	0.844403	2.96346	1.18538	5.49667	943.5	2.93142	0.977137	3.11157	1.24463	6.04299	0.542991
945	-1	0	1.81512	0.60504	2.57178	1.02871	4.3869	944.5	2.15425	0.718085	2.77441	1.10977	4.92867	-0.571333		-1.10977	4.44089e-16		4.92865			945	-1	0	1.81513	0.605041	2.57178	1.02871	4.3869	944.5	2.15426	0.718085	2.77441	1.10977	4.92867	-0.571333
946	-0.866025	0.133975	1.41452	0.471508	2.16087	0.864347	3.57539	945.5	1.60372	0.534572	2.36372	0.945487	3.96743	-1.53257		-0.811512	-2.22045e-16		3.96743			946	-0.866025	0.133975	1.41453	0.471509	2.16086	0.864347	3.57539	945.5	1.60372	0.534573	2.36371	0.945487	3.96743	-1.53257
947	-0.5	0.5	1.43875	0.479585	1.84082	0.736329	3.27958	946.5	1.42731	0.47577	1.98954	0.795815	3.41685	-2.08315		-0.295815	4.44089e-16		3.41686			947	-0.5	0.5	1.43876	0.479585	1.84082	0.736329	3.27958	946.5	1.42732	0.475771	1.98953	0.795814	3.41685	-2.08315
948	-5.48845e-14	1	1.88132	0.627106	1.6974	0.678962	3.57872	947.5	1.67231	0.557436	1.75213	0.700854	3.42444	-2.07556		0.299146	0		3.42446			948	-5.48845e-14	1	1.88132	0.627106	1.6974	0.678962	3.57872	947.5	1.67231	0.557436	1.75213	0.700854	3.42444	-2.07556
949	0.5	1.5	2.62363	0.874544	1.76904	0.707616	4.39267	948.5	2.27306	0.757686	1.71512	0.686049	3.98818	-1.51182		0.813951	0		3.98821			949	0.5	1.5	2.62364	0.874544	1.76904	0.707616	4.39267	948.5	2.27306	0.757686	1.71512	0.686049	3.98818	-1.51182
950	0.866025	1.86603	3.46679	1.1556	2.03654	0.814615	5.50333	949.5	3.06859	1.02286	1.88842	0.755367	4.95701	-0.542991		1.11066	0		4.95705			950	0.866025	1.86603	3.4668	1.1556	2.03653	0.814615	5.50333	949.5	3.0686	1.02286	1.88841	0.755367	4.95701	-0.542991
951	1	2	4.18488	1.39496	2.42822	0.971287	6.6131	950.5	3.84575	1.28192	2.22559	0.890235	6.07133	0.571333		1.10977	0		6.07137			951	1	2	4.18488	1.39496	2.42821	0.971287	6.6131	950.5	3.84575	1.28191	2.22558	0.890235	6.07133	0.571333
952	0.866025	1.86603	4.58548	1.52849	2.83913	1.13565	7.42461	951.5	4.39628	1.46543	2.63628	1.05451	7.03257	1.53257		0.811512	0		7.0326			952	0.866025	1.86603	4.58548	1.52849	2.83913	1.13565	7.42461	951.5	4.39629	1.46543	2.63628	1.05451	7.03257	1.53257
953	0.5	1.5	4.56125	1.52042	3.15918	1.26367	7.72042	952.5	4.57269	1.52423	3.01046	1.20419	7.58315	2.08315		0.295815	0		7.58317			953	0.5	1.5	4.56125	1.52041	3.15917	1.26367	7.72042	952.5	4.5727	1.52423	3.01046	1.20419	7.58315	2.08315
954	6.56651e-14	1	4.11868	1.37289	3.3026	1.32104	7.42128	953.5	4.32769	1.44256	3.24787	1.29915	7.57556	2.07556		-0.299146	0		7.57556			954	6.56651e-14	1	4.11869	1.37289	3.30259	1.32104	7.42128	953.5	4.3277	1.44256	3.24786	1.29915	7.57556	2.07556
955	-0.5	0.5	3.37637	1.12546	3.23096	1.29238	6.60733	954.5	3.72694	1.24231	3.28488	1.31395	7.01182	1.51182		-0.813951	-8.88178e-16		7.01181			955	-0.5	0.5	3.37638	1.12546	3.23095	1.29238	6.60733	954.5	3.72695	1.24231	3.28487	1.31395	7.01182	1.51182
956	-0.866025	0.133975	2.53321	0.844402	2.96346	1.18538	5.49667	955.5	2.93141	0.977136	3.11158	1.24463	6.04299	0.542991		-1.11066	0		6.04297			956	-0.866025	0.133975	2.53321	0.844403	2.96346	1.18538	5.49667	955.5	2.93142	0.977137	3.11157	1.24463	6.04299	0.542991
957	-1	0	1.81512	0.60504	2.57178	1.02871	4.3869	956.5	2.15425	0.718085	2.77441	1.10977	4.92867	-0.571333		-1.10977	-8.88178e-16		4.92865			957	-1	0	1.81513	0.605041	2.57178	1.02871	4.3869	956.5	2.15426	0.718085	2.77441	1.10977	4.92867	-0.571333
958	-0.866025	0.133975	1.41452	0.471508	2.16087	0.864347	3.57539	957.5	1.60372	0.534572	2.36372	0.945487	3.96743	-1.53257		-0.811512	6.66134e-16		3.96743			958	-0.866025	0.133975	1.41453	0.471509	2.16086	0.864347	3.57539	957.5	1.60372	0.534573	2.36371	0.945487	3.96743	-1.53257
959	-0.5	0.5	1.43875	0.479585	1.84082	0.736329	3.27958	958.5	1.42731	0.47577	1.98954	0.795815	3.41685	-2.08315		-0.295815	0		3.41686			959	-0.5	0.5	1.43876	0.479585	1.84082	0.736329	3.27958	958.5	1.42732	0.475771	1.98953	0.795814	3.41685	-2.08315
960	-7.64458e-14	1	1.88132	0.627106	1.6974	0.678962	3.57872	959.5	1.67231	0.557436	1.75213	0.700854	3.42444	-2.07556		0.299146	0		3.42446			960	-7.64458e-14	1	1.88132	0.627106	1.6974	0.678962	3.57872	959.5	1.67231	0.557436	1.75213	0.700854	3.42444	-2.07556
961	0.5	1.5	2.62363	0.874544	1.76904	0.707616	4.39267	960.5	2.27306	0.757686	1.71512	0.686049	3.98818	-1.51182		0.813951	0		3.98821			961	0.5	1.5	2.62364	0.874544	1.76904	0.707616	4.39267	960.5	2.27306	0.757686	1.71512	0.686049	3.98818	-1.51182
962	0.866025	1.86603	3.46679	1.1556	2.03654	0.814615	5.50333	961.5	3.06859	1.02286	1.88842	0.755367	4.95701	-0.542991		1.11066	0		4.95705			962	0.866025	1.86603	3.4668	1.1556	2.03653	0.814615	5.50333	961.5	3.0686	1.02286	1.88841	0.755367	4.95701	-0.542991
963	1	2	4.18488	1.39496	2.42822	0.971287	6.6131	962.5	3.84575	1.28192	2.22559	0.890235	6.07133	0.571333		1.10977	0		6.07137			963	1	2	4.18488	1.39496	2.42821	0.971287	6.6131	962.5	3.84575	1.28191	2.22558	0.890235	6.07133	0.571333
964	0.866025	1.86603	4.58548	1.52849	2.83913	1.13565	7.42461	963.5	4.39628	1.46543	2.63628	1.05451	7.03257	1.53257		0.811512	0		7.0326			964	0.866025	1.86603	4.58548	1.52849	2.83913	1.13565	7.42461	963.5	4.39629	1.46543	2.63628	1.05451	7.03257	1.53257
965	0.5	1.5	4.56125	1.52042	3.15918	1.26367	7.72042	964.5	4.57269	1.52423	3.01046	1.20419	7.58315	2.08315		0.295815	0		7.58317			965	0.5	1.5	4.56125	1.52041	3.15917	1.26367	7.72042	964.5	4.5727	1.52423	3.01046	1.20419	7.58315	2.08315
966	3.0383e-14	1	4.11868	1.37289	3.3026	1.32104	7.42128	965.5	4.32769	1.44256	3.24787	1.29915	7.57556	2.07556		-0.299146	0		7.57556			966	3.0383e-14	1	4.11869	1.37289	3.30259	1.32104	7.42128	965.5	4.3277	1.44256	3.24786	1.29915	7.57556	2.07556
967	-0.5	0.5	3.37637	1.12546	3.23096	1.29238	6.60733	966.5	3.72694	1.24231	3.28488	1.31395	7.01182	1.51182		-0.813951	0		7.01181			967	-0.5	0.5	3.37638	1.12546	3.23095	1.29238	6.60733	966.5	3.72695	1.24231	3.28487	1.31395	7.01182	1.51182
968	-0.866025	0.133975	2.53321	0.844402	2.96346	1.18538	5.49667	967.5	2.93141	0.977136	3.11158	1.24463	6.04299	0.542991		-1.11066	-8.88178e-16		6.04297			968	-0.866025	0.133975	2.53321	0.844403	2.96346	1.18538	5.49667	967.5	2.93142	0.977137	3.11157	1.24463	6.04299	0.542991
969	-1	0	1.81512	0.60504	2.57178	1.02871	4.3869	968.5	2.15425	0.718085	2.77441	1.10977	4.92867	-0.571333		-1.10977	2.22045e-16		4.92865			969	-1	0	1.81513	0.605041	2.57178	1.02871	4.3869	968.5	2.15426	0.718085	2.77441	1.10977	4.92867	-0.571333
970	-0.866025	0.133975	1.41452	0.471508	2.16087	0.864347	3.57539	969.5	1.60372	0.534572	2.36372	0.945487	3.96743	-1.53257		-0.811512	3.33067e-16		3.96743			970	-0.866025	0.133975	1.41453	0.471509	2.16086	0.864347	3.57539	969.5	1.60372	0.534573	2.36371	0.945487	3.96743	-1.53257
971	-0.5	0.5	1.43875	0.479585	1.84082	0.736329	3.27958	970.5	1.42731	0.47577	1.98954	0.795815	3.41685	-2.08315		-0.295815	0		3.41686			971	-0.5	0.5	1.43876	0.479585	1.84082	0.736329	3.27958	970.5	1.42732	0.475771	1.98953	0.795814	3.41685	-2.08315
972	-4.11637e-14	1	1.88132	0.627106	1.6974	0.678962	3.57872	971.5	1.67231	0.557436	1.75213	0.700854	3.42444	-2.07556		0.299146	0		3.42446			972	-4.11637e-14	1	1.88132	0.627106	1.6974	0.678962	3.57872	971.5	1.67231	0.557436	1.75213	0.700854	3.42444	-2.07556
973	0.5	1.5	2.62363	0.874544	1.76904	0.707616	4.39267	972.5	2.27306	0.757686	1.71512	0.686049	3.98818	-1.51182		0.813951	0		3.98821			973	0.5	1.5	2.62364	0.874544	1.76904	0.707616	4.39267	972.5	2.27306	0.757686	1.71512	0.686049	3.98818	-1.51182
974	0.866025	1.86603	3.46679	1.1556	2.03654	0.814615	5.50333	973.5	3.06859	1.02286	1.88842	0.755367	4.95701	-0.542991		1.11066	0		4.95705			974	0.866025	1.86603	3.4668	1.1556	2.03653	0.814615	5.50333	973.5	3.0686	1.02286	1.88841	0.755367	4.95701	-0.542991
975	1	2	4.18488	1.39496	2.42822	0.971287	6.6131	974.5	3.84575	1.28192	2.22559	0.890235	6.07133	0.571333		1.10977	0		6.07137			975	1	2	4.18488	1.39496	2.42821	0.971287	6.6131	974.5	3.84575	1.28191	2.22558	0.890235	6.07133	0.571333
976	0.866025	1.86603	4.58548	1.52849	2.83913	1.13565	7.42461	975.5	4.39628	1.46543	2.63628	1.05451	7.03257	1.53257		0.811512	0		7.0326			976	0.866025	1.86603	4.58548	1.52849	2.83913	1.13565	7.42461	975.5	4.39629	1.46543	2.63628	1.05451	7.03257	1.53257
977	0.5	1.5	4.56125	1.52042	3.15918	1.26367	7.72042	976.5	4.57269	1.52423	3.01046	1.20419	7.58315	2.08315		0.295815	0		7.58317			977	0.5	1.5	4.56125	1.52041	3.15917	1.26367	7.72042	976.5	4.5727	1.52423	3.01046	1.20419	7.58315	2.08315
978	5.19443e-14	1	4.11868	1.37289	3.3026	1.32104	7.42128	977.5	4.32769	1.44256	3.24787	1.29915	7.57556	2.07556		-0.299146	0		7.57556			978	5.19443e-14	1	4.11869	1.37289	3.30259	1.32104	7.42128	977.5	4.3277	1.44256	3.24786	1.29915	7.57556	2.07556
979	-0.5	0.5	3.37637	1.12546	3.23096	1.29238	6.60733	978.5	3.72694	1.24231	3.28488	1.31395	7.01182	1.51182		-0.813951	0		7.01181			979	-0.5	0.5	3.37638	1.12546	3.23095	1.29238	6.60733	978.5	3.72695	1.24231	3.28487	1.31395	7.01182	1.51182
980	-0.866025	0.133975	2.53321	0.844402	2.96346	1.18538	5.49667	979.5	2.93141	0.977136	3.11158	1.24463	6.04299	0.542991		-1.11066	0		6.04297			980	-0.866025	0.133975	2.53321	0.844403	2.96346	1.18538	5.49667	979.5	2.93142	0.977137	3.11157	1.24463	6.04299	0.542991
981	-1	0	1.81512	0.60504	2.57178	1.02871	4.3869	980.5	2.15425	0.718085	2.77441	1.10977	4.92867	-0.571333		-1.10977	4.44089e-16		4.92865			981	-1	0	1.81513	0.605041	2.57178	1.02871	4.3869	980.5	2.15426	0.718085	2.77441	1.10977	4.92867	-0.571333
982	-0.866025	0.133975	1.41452	0.471508	2.16087	0.864347	3.57539	981.5	1.60372	0.534572	2.36372	0.945487	3.96743	-1.53257		-0.811512	-3.33067e-16		3.96743			982	-0.866025	0.133975	1.41453	0.471509	2.16086	0.864347	3.57539	981.5	1.60372	0.534573	2.36371	0.945487	3.96743	-1.53257
983	-0.5	0.5	1.43875	0.479585	1.84082	0.736329	3.27958	982.5	1.42731	0.47577	1.98954	0.795815	3.41685	-2.08315		-0.295815	0		3.41686			983	-0.5	0.5	1.43876	0.479585	1.84082	0.736329	3.27958	982.5	1.42732	0.475771	1.98953	0.795814	3.41685	-2.08315
984	-6.2725e-14	1	1.88132	0.627106	1.6974	0.678962	3.57872	983.5	1.67231	0.557436	1.75213	0.700854	3.42444	-2.07556		0.299146	0		3.42446			984	-6.2725e-14	1	1.88132	0.627106	1.6974	0.678962	3.57872	983.5	1.67231	0.557436	1.75213	0.700854	3.42444	-2.07556
985	0.5	1.5	2.62363	0.874544	1.76904	0.707616	4.39267	984.5	2.27306	0.757686	1.71512	0.686049	3.98818	-1.51182		0.813951	0		3.98821			985	0.5	1.5	2.62364	0.874544	1.76904	0.707616	4.39267	984.5	2.27306	0.757686	1.71512	0.686049	3.98818	-1.51182
986	0.866025	1.86603	3.46679	1.1556	2.03654	0.814615	5.50333	985.5	3.06859	1.02286	1.88842	0.755367	4.95701	-0.542991		1.11066	0		4.95705			986	0.866025	1.86603	3.4668	1.1556	2.03653	0.814615	5.50333	985.5	3.0686	1.02286	1.88841	0.755367	4.95701	-0.542991
987	1	2	4.18488	1.39496	2.42822	0.971287	6.6131	986.5	3.84575	1.28192	2.22559	0.890235	6.07133	0.571333		1.10977	0		6.07137			987	1	2	4.18488	1.39496	2.42821	0.971287	6.6131	986.5	3.84575	1.28191	2.22558	0.890235	6.07133	0.571333
988	0.866025	1.86603	4.58548	1.52849	2.83913	1.13565	7.42461	987.5	4.39628	1.46543	2.63628	1.05451	7.03257	1.53257		0.811512	0		7.0326			988	0.866025	1.86603	4.58548	1.52849	2.83913	1.13565	7.42461	987.5	4.39629	1.46543	2.63628	1.05451	7.03257	1.53257
989	0.5	1.5	4.56125	1.52042	3.15918	1.26367	7.72042	988.5	4.57269	1.52423	3.01046	1.20419	7.58315	2.08315		0.295815	0		7.58317			989	0.5	1.5	4.56125	1.52041	3.15917	1.26367	7.72042	988.5	4.5727	1.52423	3.01046	1.20419	7.58315	2.08315
990	7.35057e-14	1	4.11868	1.37289	3.3026	1.32104	7.42128	989.5	4.32769	1.44256	3.24787	1.29915	7.57556	2.07556		-0.299146	0		7.57556			990	7.35057e-14	1	4.11869	1.37289	3.30259	1.32104	7.42128	989.5	4.3277	1.44256	3.24786	1.29915	7.57556	2.07556
991	-0.5	0.5	3.37637	1.12546	3.23096	1.29238	6.60733	990.5	3.72694	1.24231	3.28488	1.31395	7.01182	1.51182		-0.813951	0		7.01181			991	-0.5	0.5	3.37638	1.12546	3.23095	1.29238	6.60733	990.5	3.72695	1.24231	3.28487	1.31395	7.01182	1.51182
992	-0.866025	0.133975	2.53321	0.844402	2.96346	1.18538	5.49667	991.5	2.93141	0.977136	3.11158	1.24463	6.04299	0.542991		-1.11066	6.66134e-16		6.04297			992	-0.866025	0.133975	2.53321	0.844403	2.96346	1.18538	5.49667	991.5	2.93142	0.977137	3.11157	1.24463	6.04299	0.542991
993	-1	0	1.81512	0.60504	2.57178	1.02871	4.3869	992.5	2.15425	0.718085	2.77441	1.10977	4.92867	-0.571333		-1.10977	-4.44089e-16		4.92865			993	-1	0	1.81513	0.605041	2.57178	1.02871	4.3869	992.5	2.15426	0.718085	2.77441	1.10977	4.92867	-0.571333
994	-0.866025	0.133975	1.41452	0.471508	2.16087	0.864347	3.57539	993.5	1.60372	0.534572	2.36372	0.945487	3.96743	-1.53257		-0.811512	0		3.96743			994	-0.866025	0.133975	1.41453	0.471509	2.16086	0.864347	3.57539	993.5	1.60372	0.534573	2.36371	0.945487	3.96743	-1.53257
995	-0.5	0.5	1.43875	0.479585	1.84082	0.736329	3.27958	994.5	1.42731	0.47577	1.98954	0.795815	3.41685	-2.08315		-0.295815	0		3.41686			995	-0.5	0.5	1.43876	0.479585	1.84082	0.736329	3.27958	994.5	1.42732	0.475771	1.98953	0.795814	3.41685	-2.08315
996	-8.42863e-14	1	1.88132	0.627106	1.6974	0.678962	3.57872	995.5	1.67231	0.557436	1.75213	0.700854	3.42444	-2.07556		0.299146	0		3.42446			996	-8.42863e-14	1	1.88132	0.627106	1.6974	0.678962	3.57872	995.5	1.67231	0.557436	1.75213	0.700854	3.42444	-2.07556
997	0.5	1.5	2.62363	0.874544	1.76904	0.707616	4.39267	996.5	2.27306	0.757686	1.71512	0.686049	3.98818	-1.51182		0.813951	0		3.98821			997	0.5	1.5	2.62364	0.874544	1.76904	0.707616	4.39267	996.5	2.27306	0.757686	1.71512	0.686049	3.98818	-1.51182
998	0.866025	1.86603	3.46679	1.1556	2.03654	0.814615	5.50333	997.5	3.06859	1.02286	1.88842	0.755367	4.95701	-0.542991		1.11066	0		4.95705			998	0.866025	1.86603	3.4668	1.1556	2.03653	0.814615	5.50333	997.5	3.0686	1.02286	1.88841	0.755367	4.95701	-0.542991
999	1	2	4.18488	1.39496	2.42822	0.971287	6.6131	998.5	3.84575	1.28192	2.22559	0.890235	6.07133	0.571333		1.10977	0		6.07137			999	1	2	4.18488	1.39496	2.42821	0.971287	6.6131	998.5	3.84575	1.28191	2.22558	0.890235	6.07133	0.571333
1000	0.866025	1.86603	4.58548	1.52849	2.83913	1.13565	7.42461	999.5	4.39628	1.46543	2.63628	1.05451	7.03257	1.53257		0.811512	0		7.0326			1000	0.866025	1.86603	4.58548	1.52849	2.83913	1.13565	7.42461	999.5	4.39629	1.46543	2.63628	1.05451	7.03257	1.53257
1001	0.5	1.5	4.56125	1.52042	3.15918	1.26367	7.72042	1000.5	4.57269	1.52423	3.01046	1.20419	7.58315	2.08315		0.295815	0		7.58317			1001	0.5	1.5	4.56125	1.52041	3.15917	1.26367	7.72042	1000.5	4.5727	1.52423	3.01046	1.20419	7.58315	2.08315
1002	9.5067e-14	1	4.11868	1.37289	3.3026	1.32104	7.42128	1001.5	4.32769	1.44256	3.24787	1.29915	7.57556	2.07556		-0.299146	0		7.57556			1002	9.5067e-14	1	4.11869	1.37289	3.30259	1.32104	7.42128	1001.5	4.3277	1.44256	3.24786	1.29915	7.57556	2.07556
1003	-0.5	0.5	3.37637	1.12546	3.23096	1.29238	6.60733	1002.5	3.72694	1.24231	3.28488	1.31395	7.01182	1.51182		-0.813951	0		7.01181			1003	-0.5	0.5	3.37638	1.12546	3.23095	1.29238	6.60733	1002.5	3.72695	1.24231	3.28487	1.31395	7.01182	1.51182
1004	-0.866025	0.133975	2.53321	0.844402	2.96346	1.18538	5.49667	1003.5	2.93141	0.977136	3.11158	1.24463	6.04299	0.542991		-1.11066	0		6.04297			1004	-0.866025	0.133975	2.53321	0.844403	2.96346	1.18538	5.49667	1003.5	2.93142	0.977137	3.11157	1.24463	6.04299	0.542991
1005	-1	0	1.81512	0.60504	2.57178	1.02871	4.3869	1004.5	2.15425	0.718085	2.77441	1.10977	4.92867	-0.571333		-1.10977	0		4.92865			1005	-1	0	1.81513	0.605041	2.57178	1.02871	4.3869	1004.5	2.15426	0.718085	2.77441	1.10977	4.92867	-0.571333
1006	-0.866025	0.133975	1.41452	0.471508	2.16087	0.864347	3.57539	1005.5	1.60372	0.534572	2.36372	0.945487	3.96743	-1.53257		-0.811512	-4.44089e-16		3.96743			1006	-0.866025	0.133975	1.41453	0.471509	2.16086	0.864347	3.57539	1005.5	1.60372	0.534573	2.36371	0.945487	3.96743	-1.53257
1007	-0.5	0.5	1.43875	0.479585	1.84082	0.736329	3.27958	1006.5	1.42731	0.47577	1.98954	0.795815	3.41685	-2.08315		-0.295815	0		3.41686			1007	-0.5	0.5	1.43876	0.479585	1.84082	0.736329	3.27958	1006.5	1.42732	0.475771	1.98953	0.795814	3.41685	-2.08315
1008	-1.05848e-13	1	1.88132	0.627106	1.6974	0.678962	3.57872	1007.5	1.67231	0.557436	1.75213	0.700854	3.42444	-2.07556		0.299146	0		3.42446			1008	-1.05848e-13	1	1.88132	0.627106	1.6974	0.678962	3.57872	1007.5	1.67231	0.557436	1.75213	0.700854	3.42444	-2.07556
1009	0.5	1.5	2.62363	0.874544	1.76904	0.707616	4.39267	1008.5	2.27306	0.757686	1.71512	0.686049	3.98818	-1.51182		0.813951	0		3.98821			1009	0.5	1.5	2.62364	0.874544	1.76904	0.707616	4.39267	1008.5	2.27306	0.757686	1.71512	0.686049	3.98818	-1.51182
1010	0.866025	1.86603	3.46679	1.1556	2.03654	0.814615	5.50333	1009.5	3.06859	1.02286	1.88842	0.755367	4.95701	-0.542991		1.11066	0		4.95705			1010	0.866025	1.86603	3.4668	1.1556	2.03653	0.814615	5.50333	1009.5	3.0686	1.02286	1.88841	0.755367	4.95701	-0.542991
1011	1	2	4.18488	1.39496	2.42822	0.971287	6.6131	1010.5	3.84575	1.28192	2.22559	0.890235	6.07133	0.571333		1.10977	0		6.07137			1011	1	2	4.18488	1.39496	2.42821	0.971287	6.6131	1010.5	3.84575	1.28191	2.22558	0.890235	6.07133	0.571333
1012	0.866025	1.86603	4.58548	1.52849	2.83913	1.13565	7.42461	1011.5	4.39628	1.46543	2.63628	1.05451	7.03257	1.53257		0.811512	0		7.0326			1012	0.866025	1.86603	4.58548	1.52849	2.83913	1.13565	7.42461	1011.5	4.39629	1.46543	2.63628	1.05451	7.03257	1.53257
1013	0.5	1.5	4.56125	1.52042	3.15918	1.26367	7.72042	1012.5	4.57269	1.52423	3.01046	1.20419	7.58315	2.08315		0.295815	0		7.58317			1013	0.5	1.5	4.56125	1.52041	3.15917	1.26367	7.72042	1012.5	4.5727	1.52423	3.01046	1.20419	7.58315	2.08315
1014	2.94144e-15	1	4.11868	1.37289	3.3026	1.32104	7.42128	1013.5	4.32769	1.44256	3.24787	1.29915	7.57556	2.07556		-0.299146	0		7.57556			1014	2.94144e-15	1	4.11869	1.37289	3.30259	1.32104	7.42128	1013.5	4.3277	1.44256	3.24786	1.29915	7.57556	2.07556
1015	-0.5	0.5	3.37637	1.12546	3.23096	1.29238	6.60733	1014.5	3.72694	1.24231	3.28488	1.31395	7.01182	1.51182		-0.813951	-1.33227e-15		7.01181			1015	-0.5	0.5	3.37638	1.12546	3.23095	1.29238	6.60733	1014.5	3.72695	1.24231	3.28487	1.31395	7.01182	1.51182
1016	-0.866025	0.133975	2.53321	0.844402	2.96346	1.18538	5.49667	1015.5	2.93141	0.977136	3.11158	1.24463	6.04299	0.542991		-1.11066	4.44089e-16		6.04297			1016	-0.866025	0.133975	2.53321	0.844403	2.96346	1.18538	5.49667	1015.5	2.93142	0.977137	3.11157	1.24463	6.04299	0.542991
1017	-1	0	1.81512	0.60504	2.57178	1.02871	4.3869	1016.5	2.15425	0.718085	2.77441	1.10977	4.92867	-0.571333		-1.10977	4.44089e-16		4.92865			1017	-1	0	1.81513	0.605041	2.57178	1.02871	4.3869	1016.5	2.15426	0.718085	2.77441	1.10977	4.92867	-0.571333
1018	-0.866025	0.133975	1.41452	0.471508	2.16087	0.864347	3.57539	1017.5	1.60372	0.534572	2.36372	0.945487	3.96743	-1.53257		-0.811512	-3.33067e-16		3.96743			1018	-0.866025	0.133975	1.41453	0.471509	2.16086	0.864347	3.57539	1017.5	1.60372	0.534573	2.36371	0.945487	3.96743	-1.53257
1019	-0.5	0.5	1.43875	0.479585	1.84082	0.736329	3.27958	1018.5	1.42731	0.47577	1.98954	0.795815	3.41685	-2.08315		-0.295815	0		3.41686			1019	-0.5	0.5	1.43876	0.479585	1.84082	0.736329	3.27958	1018.5	1.42732	0.475771	1.98953	0.795814	3.41685	-2.08315
1020	-1.37221e-14	1	1.88132	0.627106	1.6974	0.678962	3.57872	1019.5	1.67231	0.557436	1.75213	0.700854	3.42444	-2.07556		0.299146	0		3.42446			1020	-1.37221e-14	1	1.88132	0.627106	1.6974	0.678962	3.57872	1019.5	1.67231	0.557436	1.75213	0.700854	3.42444	-2.07556
1021	0.5	1.5	2.62363	0.874544	1.76904	0.707616	4.39267	1020.5	2.27306	0.757686	1.71512	0.686049	3.98818	-1.51182		0.813951	0		3.98821			1021	0.5	1.5	2.62364	0.874544	1.76904	0.707616	4.39267	1020.5	2.27306	0.757686	1.71512	0.686049	3.98818	-1.51182
1022	0.866025	1.86603	3.46679	1.1556	2.03654	0.814615	5.50333	1021.5	3.06859	1.02286	1.88842	0.755367	4.95701	-0.542991		1.11066	0		4.95705			1022	0.866025	1.86603	3.4668	1.1556	2.03653	0.814615	5.50333	1021.5	3.0686	1.02286	1.88841	0.755367	4.95701	-0.542991
1023	1	2	4.18488	1.39496	2.42822	0.971287	6.6131	1022.5	3.84575	1.28192	2.22559	0.890235	6.07133	0.571333		1.10977	0		6.07137			1023	1	2	4.18488	1.39496	2.42821	0.971287	6.6131	1022.5	3.84575	1.28191	2.22558	0.890235	6.07133	0.571333
1024	0.866025	1.86603	4.58548	1.52849	2.83913	1.13565	7.42461	1023.5	4.39628	1.46543	2.63628	1.05451	7.03257	1.53257		0.811512	0		7.0326			1024	0.866025	1.86603	4.58548	1.52849	2.83913	1.13565	7.42461	1023.5	4.39629	1.46543	2.63628	1.05451	7.03257	1.53257
1025	0.5	1.5	4.56125	1.52042	3.15918	1.26367	7.72042	1024.5	4.57269	1.52423	3.01046	1.20419	7.58315	2.08315		0.295815	0		7.58317			1025	0.5	1.5	4.56125	1.52041	3.15917	1.26367	7.72042	1024.5	4.5727	1.52423	3.01046	1.20419	7.58315	2.08315
1026	2.45028e-14	1	4.11868	1.37289	3.3026	1.32104	7.42128	1025.5	4.32769	1.44256	3.24787	1.29915	7.57556	2.07556		-0.299146	0		7.57556			1026	2.45028e-14	1	4.11869	1.37289	3.30259	1.32104	7.42128	1025.5	4.3277	1.44256	3.24786	1.29915	7.57556	2.07556
1027	-0.5	0.5	3.37637	1.12546	3.23096	1.29238	6.60733	1026.5	3.72694	1.24231	3.28488	1.31395	7.01182	1.51182		-0.813951	0		7.01181			1027	-0.5	0.5	3.37638	1.12546	3.23095	1.29238	6.60733	1026.5	3.72695	1.24231	3.28487	1.31395	7.01182	1.51182
1028	-0.866025	0.133975	2.53321	0.844402	2.96346	1.18538	5.49667	1027.5	2.93141	0.977136	3.11158	1.24463	6.04299	0.542991		-1.11066	7.77156e-16		6.04297			1028	-0.866025	0.133975	2.53321	0.844403	2.96346	1.18538	5.49667	1027.5	2.93142	0.977137	3.11157	1.24463	6.04299	0.542991
1029	-1	0	1.81512	0.60504	2.57178	1.02871	4.3869	1028.5	2.15425	0.718085	2.77441	1.10977	4.92867	-0.571333		-1.10977	-2.22045e-16		4.92865			1029	-1	0	1.81513	0.605041	2.57178	1.02871	4.3869	1028.5	2.15426	0.718085	2.77441	1.10977	4.92867	-0.571333
1030	-0.866025	0.133975	1.41452	0.471508	2.16087	0.864347	3.57539	1029.5	1.60372	0.534572	2.36372	0.945487	3.96743	-1.53257		-0.811512	-3.33067e-16		3.96743			1030	-0.866025	0.133975	1.41453	0.471509	2.16086	0.864347	3.57539	1029.5	1.60372	0.534573	2.36371	0.945487	3.96743	-1.53257
1031	-0.5	0.5	1.43875	0.479585	1.84082	0.736329	3.27958	1030.5	1.42731	0.47577	1.98954	0.795815	3.41685	-2.08315		-0.295815	0		3.41686			1031	-0.5	0.5	1.43876	0.479585	1.84082	0.736329	3.27958	1030.5	1.42732	0.475771	1.98953	0.795814	3.41685	-2.08315
1032	-3.52834e-14	1	1.88132	0.627106	1.6974	0.678962	3.57872	1031.5	1.67231	0.557436	1.75213	0.700854	3.42444	-2.07556		0.299146	0		3.42446			1032	-3.52834e-14	1	1.88132	0.627106	1.6974	0.678962	3.57872	1031.5	1.67231	0.557436	1.75213	0.700854	3.42444	-2.07556
1033	0.5	1.5	2.62363	0.874544	1.76904	0.707616	4.39267	1032.5	2.27306	0.757686	1.71512	0.686049	3.98818	-1.51182		0.813951	0		3.98821			1033	0.5	1.5	2.62364	0.874544	1.76904	0.707616	4.39267	1032.5	2.27306	0.757686	1.71512	0.686049	3.98818	-1.51182
1034	0.866025	1.86603	3.46679	1.1556	2.03654	0.814615	5.50333	1033.5	3.06859	1.02286	1.88842	0.755367	4.95701	-0.542991		1.11066	0		4.95705			1034	0.866025	1.86603	3.4668	1.1556	2.03653	0.814615	5.50333	1033.5	3.0686	1.02286	1.88841	0.755367	4.95701	-0.542991
1035	1	2	4.18488	1.39496	2.42822	0.971287	6.6131	1034.5	3.84575	1.28192	2.22559	0.890235	6.07133	0.571333		1.10977	0		6.07137			1035	1	2	4.18488	1.39496	2.42821	0.971287	6.6131	1034.5	3.84575	1.28191	2.22558	0.890235	6.07133	0.571333
1036	0.866025	1.86603	4.58548	1.52849	2.83913	1.13565	7.42461	1035.5	4.39628	1.46543	2.63628	1.05451	7.03257	1.53257		0.811512	0		7.0326			1036	0.866025	1.86603	4.58548	1.52849	2.83913	1.13565	7.42461	1035.5	4.39629	1.46543	2.63628	1.05451	7.03257	1.53257
1037	0.5	1.5	4.56125	1.52042	3.15918	1.26367	7.72042	1036.5	4.57269	1.52423	3.01046	1.20419	7.58315	2.08315		0.295815	0		7.58317			1037	0.5	1.5	4.56125	1.52041	3.15917	1.26367	7.72042	1036.5	4.5727	1.52423	3.01046	1.20419	7.58315	2.08315
1038	4.60641e-14	1	4.11868	1.37289	3.3026	1.32104	7.42128	1037.5	4.32769	1.44256	3.24787	1.29915	7.57556	2.07556		-0.299146	0		7.57556			1038	4.60641e-14	1	4.11869	1.37289	3.30259	1.32104	7.42128	1037.5	4.3277	1.44256	3.24786	1.29915	7.57556	2.07556
1039	-0.5	0.5	3.37637	1.12546	3.23096	1.29238	6.60733	1038.5	3.72694	1.24231	3.28488	1.31395	7.01182	1.51182		-0.813951	0		7.01181			1039	-0.5	0.5	3.37638	1.12546	3.23095	1.29238	6.60733	1038.5	3.72695	1.24231	3.28487	1.31395	7.01182	1.51182
1040	-0.866025	0.133975	2.53321	0.844402	2.96346	1.18538	5.49667	1039.5	2.93141	0.977136	3.11158	1.24463	6.04299	0.542991		-1.11066	7.77156e-16		6.04297			1040	-0.866025	0.133975	2.53321	0.844403	2.96346	1.18538	5.49667	1039.5	2.93142	0.977137	3.11157	1.24463	6.04299	0.542991
1041	-1	0	1.81512	0.60504	2.57178	1.02871	4.3869	1040.5	2.15425	0.718085	2.77441	1.10977	4.92867	-0.571333		-1.10977	4.44089e-16		4.92865			1041	-1	0	1.81513	0.605041	2.57178	1.02871	4.3869	1040.5	2.15426	0.718085	2.77441	1.10977	4.92867	-0.571333
1042	-0.866025	0.133975	1.41452	0.471508	2.16087	0.864347	3.57539	1041.5	1.60372	0.534572	2.36372	0.945487	3.96743	-1.53257		-0.811512	0		3.96743			1042	-0.866025	0.133975	1.41453	0.471509	2.16086	0.864347	3.57539	1041.5	1.60372	0.534573	2.36371	0.945487	3.96743	-1.53257
1043	-0.5	0.5	1.43875	0.479585	1.84082	0.736329	3.27958	1042.5	1.42731	0.47577	1.98954	0.795815	3.41685	-2.08315		-0.295815	0		3.41686			1043	-0.5	0.5	1.43876	0.479585	1.84082	0.736329	3.27958	1042.5	1.42732	0.475771	1.98953	0.795814	3.41685	-2.08315
1044	-5.68447e-14	1	1.88132	0.627106	1.6974	0.678962	3.57872	1043.5	1.67231	0.557436	1.75213	0.700854	3.42444	-2.07556		0.299146	0		3.42446			1044	-5.68447e-14	1	1.88132	0.627106	1.6974	0.678962	3.57872	1043.5	1.67231	0.557436	1.75213	0.700854	3.42444	-2.07556
1045	0.5	1.5	2.62363	0.874544	1.76904	0.707616	4.39267	1044.5	2.27306	0.757686	1.71512	0.686049	3.98818	-1.51182		0.813951	0		3.98821			1045	0.5	1.5	2.62364	0.874544	1.76904	0.707616	4.39267	1044.5	2.27306	0.757686	1.71512	0.686049	3.98818	-1.51182
1046	0.866025	1.86603	3.46679	1.1556	2.03654	0.814615	5.50333	1045.5	3.06859	1.02286	1.88842	0.755367	4.95701	-0.542991		1.11066	0		4.95705			1046	0.866025	1.86603	3.4668	1.1556	2.03653	0.814615	5.50333	1045.5	3.0686	1.02286	1.88841	0.755367	4.95701	-0.542991
1047	1	2	4.18488	1.39496	2.42822	0.971287	6.6131	1046.5	3.84575	1.28192	2.22559	0.890235	6.07133	0.571333		1.10977	0		6.07137			1047	1	2	4.18488	1.39496	2.42821	0.971287	6.6131	1046.5	3.84575	1.28191	2.22558	0.890235	6.07133	0.571333
1048	0.866025	1.86603	4.58548	1.52849	2.83913	1.13565	7.42461	1047.5	4.39628	1.46543	2.63628	1.05451	7.03257	1.53257		0.811512	0		7.0326			1048	0.866025	1.86603	4.58548	1.52849	2.83913	1.13565	7.42461	1047.5	4.39629	1.46543	2.63628	1.05451	7.03257	1.53257
1049	0.5	1.5	4.56125	1.52042	3.15918	1.26367	7.72042	1048.5	4.57269	1.52423	3.01046	1.20419	7.58315	2.08315		0.295815	0		7.58317			1049	0.5	1.5	4.56125	1.52041	3.15917	1.26367	7.72042	1048.5	4.5727	1.52423	3.01046	1.20419	7.58315	2.08315
1050	6.76254e-14	1	4.11868	1.37289	3.3026	1.32104	7.42128	1049.5	4.32769	1.44256	3.24787	1.29915	7.57556	2.07556		-0.299146	0		7.57556			1050	6.76254e-14	1	4.11869	1.37289	3.30259	1.32104	7.42128	1049.5	4.3277	1.44256	3.24786	1.29915	7.57556	2.07556
1051	-0.5	0.5	3.37637	1.12546	3.23096	1.29238	6.60733	1050.5	3.72694	1.24231	3.28488	1.31395	7.01182	1.51182		-0.813951	0		7.01181			1051	-0.5	0.5	3.37638	1.12546	3.23095	1.29238	6.60733	1050.5	3.72695	1.24231	3.28487	1.31395	7.01182	1.51182
1052	-0.866025	0.133975	2.53321	0.844402	2.96346	1.18538	5.49667	1051.5	2.93141	0.977136	3.11158	1.24463	6.04299	0.542991		-1.11066	2.22045e-16		6.04297			1052	-0.866025	0.133975	2.53321	0.844403	2.96346	1.18538	5.49667	1051.5	2.93142	0.977137	3.11157	1.24463	6.04299	0.542991
1053	-1	0	1.81512	0.60504	2.57178	1.02871	4.3869	1052.5	2.15425	0.718085	2.77441	1.10977	4.92867	-0.571333		-1.10977	-4.44089e-16		4.92865			1053	-1	0	1.81513	0.605041	2.57178	1.02871	4.3869	1052.5	2.15426	0.718085	2.77441	1.10977	4.92867	-0.571333
1054	-0.866025	0.133975	1.41452	0.471508	2.16087	0.864347	3.57539	1053.5	1.60372	0.534572	2.36372	0.945487	3.96743	-1.53257		-0.811512	0		3.96743			1054	-0.866025	0.133975	1.41453	0.471509	2.16086	0.864347	3.57539	1053.5	1.60372	0.534573	2.36371	0.945487	3.96743	-1.53257
1055	-0.5	0.5	1.43875	0.479585	1.84082	0.736329	3.27958	1054.5	1.42731	0.47577	1.98954	0.795815	3.41685	-2.08315		-0.295815	0		3.41686			1055	-0.5	0.5	1.43876	0.479585	1.84082	0.736329	3.27958	1054.5	1.42732	0.475771	1.98953	0.795814	3.41685	-2.08315
1056	-7.8406e-14	1	1.88132	0.627106	1.6974	0.678962	3.57872	1055.5	1.67231	0.557436	1.75213	0.700854	3.42444	-2.07556		0.299146	0		3.42446			1056	-7.8406e-14	1	1.88132	0.627106	1.6974	0.678962	3.57872	1055.5	1.67231	0.557436	1.75213	0.700854	3.42444	-2.07556
1057	0.5	1.5	2.62363	0.874544	1.76904	0.707616	4.39267	1056.5	2.27306	0.757686	1.71512	0.686049	3.98818	-1.51182		0.813951	0		3.98821			1057	0.5	1.5	2.62364	0.874544	1.76904	0.707616	4.39267	1056.5	2.27306	0.757686	1.71512	0.686049	3.98818	-1.51182
1058	0.866025	1.86603	3.46679	1.1556	2.03654	0.814615	5.50333	1057.5	3.06859	1.02286	1.88842	0.755367	4.95701	-0.542991		1.11066	0		4.95705			1058	0.866025	1.86603	3.4668	1.1556	2.03653	0.814615	5.50333	1057.5	3.0686	1.02286	1.88841	0.755367	4.95701	-0.542991
1059	1	2	4.18488	1.39496	2.42822	0.971287	6.6131	1058.5	3.84575	1.28192	2.22559	0.890235	6.07133	0.571333		1.10977	0		6.07137			1059	1	2	4.18488	1.39496	2.42821	0.971287	6.6131	1058.5	3.84575	1.28191	2.22558	0.890235	6.07133	0.571333
1060	0.866025	1.86603	4.58548	1.52849	2.83913	1.13565	7.42461	1059.5	4.39628	1.46543	2.63628	1.05451	7.03257	1.53257		0.811512	0		7.0326			1060	0.866025	1.86603	4.58548	1.52849	2.83913	1.13565	7.42461	1059.5	4.39629	1.46543	2.63628	1.05451	7.03257	1.53257
1061	0.5	1.5	4.56125	1.52042	3.15918	1.26367	7.72042	1060.5	4.57269	1.52423	3.01046	1.20419	7.58315	2.08315		0.295815	0		7.58317			1061	0.5	1.5	4.56125	1.52041	3.15917	1.26367	7.72042	1060.5	4.5727	1.52423	3.01046	1.20419	7.58315	2.08315
1062	8.91867e-14	1	4.11868	1.37289	3.3026	1.32104	7.42128	1061.5	4.32769	1.44256	3.24787	1.29915	7.57556	2.07556		-0.299146	0		7.57556			1062	8.91867e-14	1	4.11869	1.37289	3.30259	1.32104	7.42128	1061.5	4.3277	1.44256	3.24786	1.29915	7.57556	2.07556
1063	-0.5	0.5	3.37637	1.12546	3.23096	1.29238	6.60733	1062.5	3.72694	1.24231	3.28488	1.31395	7.01182	1.51182		-0.813951	0		7.01181			1063	-0.5	0.5	3.37638	1.12546	3.23095	1.29238	6.60733	1062.5	3.72695	1.24231	3.28487	1.31395	7.01182	1.51182
1064	-0.866025	0.133975	2.53321	0.844402	2.96346	1.18538	5.49667	1063.5	2.93141	0.977136	3.11158	1.24463	6.04299	0.542991		-1.11066	5.55112e-16		6.04297			1064	-0.866025	0.133975	2.53321	0.844403	2.96346	1.18538	5.49667	1063.5	2.93142	0.977137	3.11157	1.24463	6.04299	0.542991
1065	-1	0	1.81512	0.60504	2.57178	1.02871	4.3869	1064.5	2.15425	0.718085	2.77441	1.10977	4.92867	-0.571333		-1.10977	2.22045e-16		4.92865			1065	-1	0	1.81513	0.605041	2.57178	1.02871	4.3869	1064.5	2.15426	0.718085	2.77441	1.10977	4.92867	-0.571333
1066	-0.866025	0.133975	1.41452	0.471508	2.16087	0.864347	3.57539	1065.5	1.60372	0.534572	2.36372	0.945487	3.96743	-1.53257		-0.811512	-3.33067e-16		3.96743			1066	-0.866025	0.133975	1.41453	0.471509	2.16086	0.864347	3.57539	1065.5	1.60372	0.534573	2.36371	0.945487	3.96743	-1.53257
1067	-0.5	0.5	1.43875	0.479585	1.84082	0.736329	3.27958	1066.5	1.42731	0.47577	1.98954	0.795815	3.41685	-2.08315		-0.295815	0		3.41686			1067	-0.5	0.5	1.43876	0.479585	1.84082	0.736329	3.27958	1066.5	1.42732	0.475771	1.98953	0.795814	3.41685	-2.08315
1068	-9.99673e-14	1	1.88132	0.627106	1.6974	0.678962	3.57872	1067.5	1.67231	0.557436	1.75213	0.700854	3.42444	-2.07556		0.299146	0		3.42446			1068	-9.99673e-14	1	1.88132	0.627106	1.6974	0.678962	3.57872	1067.5	1.67231	0.557436	1.75213	0.700854	3.42444	-2.07556
1069	0.5	1.5	2.62363	0.874544	1.76904	0.707616	4.39267	1068.5	2.27306	0.757686	1.71512	0.686049	3.98818	-1.51182		0.813951	0		3.98821			1069	0.5	1.5	2.62364	0.874544	1.76904	0.707616	4.39267	1068.5	2.27306	0.757686	1.71512	0.686049	3.98818	-1.51182
1070	0.866025	1.86603	3.46679	1.1556	2.03654	0.814615	5.50333	1069.5	3.06859	1.02286	1.88842	0.755367	4.95701	-0.542991		1.11066	0		4.95705			1070	0.866025	1.86603	3.4668	1.1556	2.03653	0.814615	5.50333	1069.5	3.0686	1.02286	1.88841	0.755367	4.95701	-0.542991
1071	1	2	4.18488	1.39496	2.42822	0.971287	6.6131	1070.5	3.84575	1.28192	2.22559	0.890235	6.07133	0.571333		1.10977	0		6.07137			1071	1	2	4.18488	1.39496	2.42821	0.971287	6.6131	1070.5	3.84575	1.28191	2.22558	0.890235	6.07133	0.571333
1072	0.866025	1.86603	4.58548	1.52849	2.83913	1.13565	7.42461	1071.5	4.39628	1.46543	2.63628	1.05451	7.03257	1.53257		0.811512	0		7.0326			1072	0.866025	1.86603	4.58548	1.52849	2.83913	1.13565	7.42461	1071.5	4.39629	1.46543	2.63628	1.05451	7.03257	1.53257
1073	0.5	1.5	4.56125	1.52042	3.15918	1.26367	7.72042	1072.5	4.57269	1.52423	3.01046	1.20419	7.58315	2.08315		0.295815	0		7.58317			1073	0.5	1.5	4.56125	1.52041	3.15917	1.26367	7.72042	1072.5	4.5727	1.52423	3.01046	1.20419	7.58315	2.08315
1074	1.10748e-13	1	4.11868	1.37289	3.3026	1.32104	7.42128	1073.5	4.32769	1.44256	3.24787	1.29915	7.57556	2.07556		-0.299146	0		7.57556			1074	1.10748e-13	1	4.11869	1.37289	3.30259	1.32104	7.42128	1073.5	4.3277	1.44256	3.24786	1.29915	7.57556	2.07556
1075	-0.5	0.5	3.37637	1.12546	3.23096	1.29238	6.60733	1074.5	3.72694	1.24231	3.28488	1.31395	7.01182	1.51182		-0.813951	0		7.01181			1075	-0.5	0.5	3.37638	1.12546	3.23095	1.29238	6.60733	1074.5	3.72695	1.24231	3.28487	1.31395	7.01182	1.51182
1076	-0.866025	0.133975	2.53321	0.844402	2.96346	1.18538	5.49667	1075.5	2.93141	0.977136	3.11158	1.24463	6.04299	0.542991		-1.11066	-6.66134e-16		6.04297			1076	-0.866025	0.133975	2.53321	0.844403	2.96346	1.18538	5.49667	1075.5	2.93142	0.977137	3.11157	1.24463	6.04299	0.542991
1077	-1	0	1.81512	0.60504	2.57178	1.02871	4.3869	1076.5	2.15425	0.718085	2.77441	1.10977	4.92867	-0.571333		-1.10977	0		4.92865			1077	-1	0	1.81513	0.605041	2.57178	1.02871	4.3869	1076.5	2.15426	0.718085	2.77441	1.10977	4.92867	-0.571333
1078	-0.866025	0.133975	1.41452	0.471508	2.16087	0.864347	3.57539	1077.5	1.60372	0.534572	2.36372	0.945487	3.96743	-1.53257		-0.811512	2.22045e-16		3.96743			1078	-0.866025	0.133975	1.41453	0.471509	2.16086	0.864347	3.57539	1077.5	1.60372	0.534573	2.36371	0.945487	3.96743	-1.53257
1079	-0.5	0.5	1.43875	0.479585	1.84082	0.736329	3.27958	1078.5	1.42731	0.47577	1.98954	0.795815	3.41685	-2.08315		-0.295815	0		3.41686			1079	-0.5	0.5	1.43876	0.479585	1.84082	0.736329	3.27958	1078.5	1.42732	0.475771	1.98953	0.795814	3.41685	-2.08315
1080	-7.84182e-15	1	1.88132	0.627106	1.6974	0.678962	3.57872	1079.5	1.67231	0.557436	1.75213	0.700854	3.42444	-2.07556		0.299146	0		3.42446			1080	-7.84182e-15	1	1.88132	0.627106	1.6974	0.678962	3.57872	1079.5	1.67231	0.557436	1.75213	0.700854	3.42444	-2.07556
1081	0.5	1.5	2.62363	0.874544	1.76904	0.707616	4.39267	1080.5	2.27306	0.757686	1.71512	0.686049	3.98818	-1.51182		0.813951	0		3.98821			1081	0.5	1.5	2.62364	0.874544	1.76904	0.707616	4.39267	1080.5	2.27306	0.757686	1.71512	0.686049	3.98818	-1.51182
1082	0.866025	1.86603	3.46679	1.1556	2.03654	0.814615	5.50333	1081.5	3.06859	1.02286	1.88842	0.755367	4.95701	-0.542991		1.11066	0		4.95705			1082	0.866025	1.86603	3.4668	1.1556	2.03653	0.814615	5.50333	1081.5	3.0686	1.02286	1.88841	0.755367	4.95701	-0.542991
1083	1	2	4.18488	1.39496	2.42822	0.971287	6.6131	1082.5	3.84575	1.28192	2.22559	0.890235	6.07133	0.571333		1.10977	0		6.07137			1083	1	2	4.18488	1.39496	2.42821	0.971287	6.6131	1082.5	3.84575	1.28191	2.22558	0.890235	6.07133	0.571333
1084	0.866025	1.86603	4.58548	1.52849	2.83913	1.13565	7.42461	1083.5	4.39628	1.46543	2.63628	1.05451	7.03257	1.53257		0.811512	0		7.0326			1084	0.866025	1.86603	4.58548	1.52849	2.83913	1.13565	7.42461	1083.5	4.39629	1.46543	2.63628	1.05451	7.03257	1.53257
1085	0.5	1.5	4.56125	1.52042	3.15918	1.26367	7.72042	1084.5	4.57269	1.52423	3.01046	1.20419	7.58315	2.08315		0.295815	0		7.58317			1085	0.5	1.5	4.56125	1.52041	3.15917	1.26367	7.72042	1084.5	4.5727	1.52423	3.01046	1.20419	7.58315	2.08315
1086	1.86225e-14	1	4.11868	1.37289	3.3026	1.32104	7.42128	1085.5	4.32769	1.44256	3.24787	1.29915	7.57556	2.07556		-0.299146	0		7.57556			1086	1.86225e-14	1	4.11869	1.37289	3.30259	1.32104	7.42128	1085.5	4.3277	1.44256	3.24786	1.29915	7.57556	2.07556
1087	-0.5	0.5	3.37637	1.12546	3.23096	1.29238	6.60733	1086.5	3.72694	1.24231	3.28488	1.31395	7.01182	1.51182		-0.813951	0		7.01181			1087	-0.5	0.5	3.37638	1.12546	3.23095	1.29238	6.60733	1086.5	3.72695	1.24231	3.28487	1.31395	7.01182	1.51182
1088	-0.866025	0.133975	2.53321	0.844402	2.96346	1.18538	5.49667	1087.5	2.93141	0.977136	3.11158	1.24463	6.04299	0.542991		-1.11066	-3.33067e-16		6.04297			1088	-0.866025	0.133975	2.53321	0.844403	2.96346	1.18538	5.49667	1087.5	2.93142	0.977137	3.11157	1.24463	6.04299	0.542991
1089	-1	0	1.81512	0.60504	2.57178	1.02871	4.3869	1088.5	2.15425	0.718085	2.77441	1.10977	4.92867	-0.571333		-1.10977	2.22045e-16		4.92865			1089	-1	0	1.81513	0.605041	2.57178	1.02871	4.3869	1088.5	2.15426	0.718085	2.77441	1.10977	4.92867	-0.571333
1090	-0.866025	0.133975	1.41452	0.471508	2.16087	0.864347	3.57539	1089.5	1.60372	0.534572	2.36372	0.945487	3.96743	-1.53257		-0.811512	-2.22045e-16		3.96743			1090	-0.866025	0.133975	1.41453	0.471509	2.16086	0.864347	3.57539	1089.5	1.60372	0.534573	2.36371	0.945487	3.96743	-1.53257
1091	-0.5	0.5	1.43875	0.479585	1.84082	0.736329	3.27958	1090.5	1.42731	0.47577	1.98954	0.795815	3.41685	-2.08315		-0.295815	0		3.41686			1091	-0.5	0.5	1.43876	0.479585	1.84082	0.736329	3.27958	1090.5	1.42732	0.475771	1.98953	0.795814	3.41685	-2.08315
1092	-2.94031e-14	1	1.88132	0.627106	1.6974	0.678962	3.57872	1091.5	1.67231	0.557436	1.75213	0.700854	3.42444	-2.07556		0.299146	0		3.42446			1092	-2.94031e-14	1	1.88132	0.627106	1.6974	0.678962	3.57872	1091.5	1.67231	0.557436	1.75213	0.700854	3.42444	-2.07556
1093	0.5	1.5	2.62363	0.874544	1.76904	0.707616	4.39267	1092.5	2.27306	0.757686	1.71512	0.686049	3.98818	-1.51182		0.813951	0		3.98821			1093	0.5	1.5	2.62364	0.874544	1.76904	0.707616	4.39267	1092.5	2.27306	0.757686	1.71512	0.686049	3.98818	-1.51182
1094	0.866025	1.86603	3.46679	1.1556	2.03654	0.814615	5.50333	1093.5	3.06859	1.02286	1.88842	0.755367	4.95701	-0.542991		1.11066	0		4.95705			1094	0.866025	1.86603	3.4668	1.1556	2.03653	0.814615	5.50333	1093.5	3.0686	1.02286	1.88841	0.755367	4.95701	-0.542991
1095	1	2	4.18488	1.39496	2.42822	0.971287	6.6131	1094.5	3.84575	1.28192	2.22559	0.890235	6.07133	0.571333		1.10977	0		6.07137			1095	1	2	4.18488	1.39496	2.42821	0.971287	6.6131	1094.5	3.84575	1.28191	2.22558	0.890235	6.07133	0.571333
1096	0.866025	1.86603	4.58548	1.52849	2.83913	1.13565	7.42461	1095.5	4.39628	1.46543	2.63628	1.05451	7.03257	1.53257		0.811512	0		7.0326			1096	0.866025	1.86603	4.58548	1.52849	2.83913	1.13565	7.42461	1095.5	4.39629	1.46543	2.63628	1.05451	7.03257	1.53257
1097	0.5	1.5	4.56125	1.52042	3.15918	1.26367	7.72042	1096.5	4.57269	1.52423	3.01046	1.20419	7.58315	2.08315		0.295815	0		7.58317			1097	0.5	1.5	4.56125	1.52041	3.15917	1.26367	7.72042	1096.5	4.5727	1.52423	3.01046	1.20419	7.58315	2.08315
1098	4.01838e-14	1	4.11868	1.37289	3.3026	1.32104	7.42128	1097.5	4.32769	1.44256	3.24787	1.29915	7.57556	2.07556		-0.299146	0		7.57556			1098	4.01838e-14	1	4.11869	1.37289	3.30259	1.32104	7.42128	1097.5	4.3277	1.44256	3.24786	1.29915	7.57556	2.07556
1099	-0.5	0.5	3.37637	1.12546	3.23096	1.29238	6.60733	1098.5	3.72694	1.24231	3.28488	1.31395	7.01182	1.51182		-0.813951	0		7.01181			1099	-0.5	0.5	3.37638	1.12546	3.23095	1.29238	6.60733	1098.5	3.72695	1.24231	3.28487	1.31395	7.01182	1.51182
1100	-0.866025	0.133975	2.53321	0.844402	2.96346	1.18538	5.49667	1099.5	2.93141	0.977136	3.11158	1.24463	6.04299	0.542991		-1.11066	-4.44089e-16		6.04297			1100	-0.866025	0.133975	2.53321	0.844403	2.96346	1.18538	5.49667	1099.5	2.93142	0.977137	3.11157	1.24463	6.04299	0.542991
1101	-1	0	1.81512	0.60504	2.57178	1.02871	4.3869	1100.5	2.15425	0.718085	2.77441	1.10977	4.92867	-0.571333		-1.10977	0		4.92865			1101	-1	0	1.81513	0.605041	2.57178	1.02871	4.3869	1100.5	2.15426	0.718085	2.77441	1.10977	4.92867	-0.571333
1102	-0.866025	0.133975	1.41452	0.471508	2.16087	0.864347	3.57539	1101.5	1.60372	0.534572	2.36372	0.945487	3.96743	-1.53257		-0.811512	0		3.96743			1102	-0.866025	0.133975	1.41453	0.471509	2.16086	0.864347	3.57539	1101.5	1.60372	0.534573	2.36371	0.945487	3.96743	-1.53257
1103	-0.5	0.5	1.43875	0.479585	1.84082	0.736329	3.27958	1102.5	1.42731	0.47577	1.98954	0.795815	3.41685	-2.08315		-0.295815	0		3.41686			1103	-0.5	0.5	1.43876	0.479585	1.84082	0.736329	3.27958	1102.5	1.42732	0.475771	1.98953	0.795814	3.41685	-2.08315
1104	-5.09644e-14	1	1.88132	0.627106	1.6974	0.678962	3.57872	1103.5	1.67231	0.557436	1.75213	0.700854	3.42444	-2.07556		0.299146	0		3.42446			1104	-5.09644e-14	1	1.88132	0.627106	1.6974	0.678962	3.57872	1103.5	1.67231	0.557436	1.75213	0.700854	3.42444	-2.07556
1105	0.5	1.5	2.62363	0.874544	1.76904	0.707616	4.39267	1104.5	2.27306	0.757686	1.71512	0.686049	3.98818	-1.51182		0.813951	0		3.98821			1105	0.5	1.5	2.62364	0.874544	1.76904	0.707616	4.39267	1104.5	2.27306	0.757686	1.71512	0.686049	3.98818	-1.51182
1106	0.866025	1.86603	3.46679	1.1556	2.03654	0.814615	5.50333	1105.5	3.06859	1.02286	1.88842	0.755367	4.95701	-0.542991		1.11066	0		4.95705			1106	0.866025	1.86603	3.4668	1.1556	2.03653	0.814615	5.50333	1105.5	3.0686	1.02286	1.88841	0.755367	4.95701	-0.542991
1107	1	2	4.18488	1.39496	2.42822	0.971287	6.6131	1106.5	3.84575	1.28192	2.22559	0.890235	6.07133	0.571333		1.10977	0		6.07137			1107	1	2	4.18488	1.39496	2.42821	0.971287	6.6131	1106.5	3.84575	1.28191	2.22558	0.890235	6.07133	0.571333
1108	0.866025	1.86603	4.58548	1.52849	2.83913	1.13565	7.42461	1107.5	4.39628	1.46543	2.63628	1.05451	7.03257	1.53257		0.811512	0		7.0326			1108	0.866025	1.86603	4.58548	1.52849	2.83913	1.13565	7.42461	1107.5	4.39629	1.46543	2.63628	1.05451	7.03257	1.53257
1109	0.5	1.5	4.56125	1.52042	3.15918	1.26367	7.72042	1108.5	4.57269	1.52423	3.01046	1.20419	7.58315	2.08315		0.295815	0		7.58317			1109	0.5	1.5	4.56125	1.52041	3.15917	1.26367	7.72042	1108.5	4.5727	1.52423	3.01046	1.20419	7.58315	2.08315
1110	6.17451e-14	1	4.11868	1.37289	3.3026	1.32104	7.42128	1109.5	4.32769	1.44256	3.24787	1.29915	7.57556	2.07556		-0.299146	0		7.57556			1110	6.17451e-14	1	4.11869	1.37289	3.30259	1.32104	7.42128	1109.5	4.3277	1.44256	3.24786	1.29915	7.57556	2.07556
1111	-0.5	0.5	3.37637	1.12546	3.23096	1.29238	6.60733	1110.5	3.72694	1.24231	3.28488	1.31395	7.01182	1.51182		-0.813951	0		7.01181			1111	-0.5	0.5	3.37638	1.12546	3.23095	1.29238	6.60733	1110.5	3.72695	1.24231	3.28487	1.31395	7.01182	1.51182
1112	-0.866025	0.133975	2.53321	0.844402	2.96346	1.18538	5.49667	1111.5	2.93141	0.977136	3.11158	1.24463	6.04299	0.542991		-1.11066	-1.22125e-15		6.04297			1112	-0.866025	0.133975	2.53321	0.844403	2.96346	1.18538	5.49667	1111.5	2.93142	0.977137	3.11157	1.24463	6.04299	0.542991
1113	-1	0	1.81512	0.60504	2.57178	1.02871	4.3869	1112.5	2.15425	0.718085	2.77441	1.10977	4.92867	-0.571333		-1.10977	4.44089e-16		4.92865			1113	-1	0	1.81513	0.605041	2.57178	1.02871	4.3869	1112.5	2.15426	0.718085	2.77441	1.10977	4.92867	-0.571333
1114	-0.866025	0.133975	1.41452	0.471508	2.16087	0.864347	3.57539	1113.5	1.60372	0.534572	2.36372	0.945487	3.96743	-1.53257		-0.811512	-2.22045e-16		3.96743			1114	-0.866025	0.133975	1.41453	0.471509	2.16086	0.864347	3.57539	1113.5	1.60372	0.534573	2.36371	0.945487	3.96743	-1.53257
1115	-0.5	0.5	1.43875	0.479585	1.84082	0.736329	3.27958	1114.5	1.42731	0.47577	1.98954	0.795815	3.41685	-2.08315		-0.295815	0		3.41686			1115	-0.5	0.5	1.43876	0.479585	1.84082	0.736329	3.27958	1114.5	1.42732	0.475771	1.98953	0.795814	3.41685	-2.08315
1116	-7.25258e-14	1	1.88132	0.627106	1.6974	0.678962	3.57872	1115.5	1.67231	0.557436	1.75213	0.700854	3.42444	-2.07556		0.299146	0		3.42446			1116	-7.25258e-14	1	1.88132	0.627106	1.6974	0.678962	3.57872	1115.5	1.67231	0.557436	1.75213	0.700854	3.42444	-2.07556
1117	0.5	1.5	2.62363	0.874544	1.76904	0.707616	4.39267	1116.5	2.27306	0.757686	1.71512	0.686049	3.98818	-1.51182		0.813951	0		3.98821			1117	0.5	1.5	2.62364	0.874544	1.76904	0.707616	4.39267	1116.5	2.27306	0.757686	1.71512	0.686049	3.98818	-1.51182
1118	0.866025	1.86603	3.46679	1.1556	2.03654	0.814615	5.50333	1117.5	3.06859	1.02286	1.88842	0.755367	4.95701	-0.542991		1.11066	0		4.95705			1118	0.866025	1.86603	3.4668	1.1556	2.03653	0.814615	5.50333	1117.5	3.0686	1.02286	1.88841	0.755367	4.95701	-0.542991
1119	1	2	4.18488	1.39496	2.42822	0.971287	6.6131	1118.5	3.84575	1.28192	2.22559	0.890235	6.07133	0.571333		1.10977	0		6.07137			1119	1	2	4.18488	1.39496	2.42821	0.971287	6.6131	1118.5	3.84575	1.28191	2.22558	0.890235	6.07133	0.571333
1120	0.866025	1.86603	4.58548	1.52849	2.83913	1.13565	7.42461	1119.5	4.39628	1.46543	2.63628	1.05451	7.03257	1.53257		0.811512	0		7.0326			1120	0.866025	1.86603	4.58548	1.52849	2.83913	1.13565	7.42461	1119.5	4.39629	1.46543	2.63628	1.05451	7.03257	1.53257
1121	0.5	1.5	4.56125	1.52042	3.15918	1.26367	7.72042	1120.5	4.57269	1.52423	3.01046	1.20419	7.58315	2.08315		0.295815	0		7.58317			1121	0.5	1.5	4.56125	1.52041	3.15917	1.26367	7.72042	1120.5	4.5727	1.52423	3.01046	1.20419	7.58315	2.08315
1122	8.33064e-14	1	4.11868	1.37289	3.3026	1.32104	7.42128	1121.5	4.32769	1.44256	3.24787	1.29915	7.57556	2.07556		-0.299146	0		7.57556			1122	8.33064e-14	1	4.11869	1.37289	3.30259	1.32104	7.42128	1121.5	4.3277	1.44256	3.24786	1.29915	7.57556	2.07556
1123	-0.5	0.5	3.37637	1.12546	3.23096	1.29238	6.60733	1122.5	3.72694	1.24231	3.28488	1.31395	7.01182	1.51182		-0.813951	0		7.01181			1123	-0.5	0.5	3.37638	1.12546	3.23095	1.29238	6.60733	1122.5	3.72695	1.24231	3.28487	1.31395	7.01182	1.51182
1124	-0.866025	0.133975	2.53321	0.844402	2.96346	1.18538	5.49667	1123.5	2.93141	0.977136	3.11158	1.24463	6.04299	0.542991		-1.11066	1.11022e-15		6.04297			1124	-0.866025	0.133975	2.53321	0.844403	2.96346	1.18538	5.49667	1123.5	2.93142	0.977137	3.11157	1.24463	6.04299	0.542991
1125	-1	0	1.81512	0.60504	2.57178	1.02871	4.3869	1124.5	2.15425	0.718085	2.77441	1.10977	4.92867	-0.571333		-1.10977	-6.66134e-16		4.92865			1125	-1	0	1.81513	0.605041	2.57178	1.02871	4.3869	1124.5	2.15426	0.718085	2.77441	1.10977	4.92867	-0.571333
1126	-0.866025	0.133975	1.41452	0.471508	2.16087	0.864347	3.57539	1125.5	1.60372	0.534572	2.36372	0.945487	3.96743	-1.53257		-0.811512	-2.22045e-16		3.96743			1126	-0.866025	0.133975	1.41453	0.471509	2.16086	0.864347	3.57539	1125.5	1.60372	0.534573	2.36371	0.945487	3.96743	-1.53257
1127	-0.5	0.5	1.43875	0.479585	1.84082	0.736329	3.27958	1126.5	1.42731	0.47577	1.98954	0.795815	3.41685	-2.08315		-0.295815	0		3.41686			1127	-0.5	0.5	1.43876	0.479585	1.84082	0.736329	3.27958	1126.5	1.42732	0.475771	1.98953	0.795814	3.41685	-2.08315
1128	-9.40871e-14	1	1.88132	0.627106	1.6974	0.678962	3.57872	1127.5	1.67231	0.557436	1.75213	0.700854	3.42444	-2.07556		0.299146	0		3.42446			1128	-9.40871e-14	1	1.88132	0.627106	1.6974	0.678962	3.57872	1127.5	1.67231	0.557436	1.75213	0.700854	3.42444	-2.07556
1129	0.5	1.5	2.62363	0.874544	1.76904	0.707616	4.39267	1128.5	2.27306	0.757686	1.71512	0.686049	3.98818	-1.51182		0.813951	0		3.98821			1129	0.5	1.5	2.62364	0.874544	1.76904	0.707616	4.39267	1128.5	2.27306	0.757686	1.71512	0.686049	3.98818	-1.51182
1130	0.866025	1.86603	3.46679	1.1556	2.03654	0.814615	5.50333	1129.5	3.06859	1.02286	1.88842	0.755367	4.95701	-0.542991		1.11066	0		4.95705			1130	0.866025	1.86603	3.4668	1.1556	2.03653	0.814615	5.50333	1129.5	3.0686	1.02286	1.88841	0.755367	4.95701	-0.542991
1131	1	2	4.18488	1.39496	2.42822	0.971287	6.6131	1130.5	3.84575	1.28192	2.22559	0.890235	6.07133	0.571333		1.10977	0		6.07137			1131	1	2	4.18488	1.39496	2.42821	0.971287	6.6131	1130.5	3.84575	1.28191	2.22558	0.890235	6.07133	0.571333
1132	0.866025	1.86603	4.58548	1.52849	2.83913	1.13565	7.42461	1131.5	4.39628	1.46543	2.63628	1.05451	7.03257	1.53257		0.811512	0		7.0326			1132	0.866025	1.86603	4.58548	1.52849	2.83913	1.13565	7.42461	1131.5	4.39629	1.46543	2.63628	1.05451	7.03257	1.53257
1133	0.5	1.5	4.56125	1.52042	3.15918	1.26367	7.72042	1132.5	4.57269	1.52423	3.01046	1.20419	7.58315	2.08315		0.295815	0		7.58317			1133	0.5	1.5	4.56125	1.52041	3.15917	1.26367	7.72042	1132.5	4.5727	1.52423	3.01046	1.20419	7.58315	2.08315
1134	1.04868e-13	1	4.11868	1.37289	3.3026	1.32104	7.42128	1133.5	4.32769	1.44256	3.24787	1.29915	7.57556	2.07556		-0.299146	0		7.57556			1134	1.04868e-13	1	4.11869	1.37289	3.30259	1.32104	7.42128	1133.5	4.3277	1.44256	3.24786	1.29915	7.57556	2.07556
1135	-0.5	0.5	3.37637	1.12546	3.23096	1.29238	6.60733	1134.5	3.72694	1.24231	3.28488	1.31395	7.01182	1.51182		-0.813951	0		7.01181			1135	-0.5	0.5	3.37638	1.12546	3.23095	1.29238	6.60733	1134.5	3.72695	1.24231	3.28487	1.31395	7.01182	1.51182
1136	-0.866025	0.133975	2.53321	0.844402	2.96346	1.18538	5.49667	1135.5	2.93141	0.977136	3.11158	1.24463	6.04299	0.542991		-1.11066	7.77156e-16		6.04297			1136	-0.866025	0.133975	2.53321	0.844403	2.96346	1.18538	5.49667	1135.5	2.93142	0.977137	3.11157	1.24463	6.04299	0.542991
1137	-1	0	1.81512	0.60504	2.57178	1.02871	4.3869	1136.5	2.15425	0.718085	2.77441	1.10977	4.92867	-0.571333		-1.10977	4.44089e-16		4.92865			1137	-1	0	1.81513	0.605041	2.57178	1.02871	4.3869	1136.5	2.15426	0.718085	2.77441	1.10977	4.92867	-0.571333
1138	-0.866025	0.133975	1.41452	0.471508	2.16087	0.864347	3.57539	1137.5	1.60372	0.534572	2.36372	0.945487	3.96743	-1.53257		-0.811512	-2.22045e-16		3.96743			1138	-0.866025	0.133975	1.41453	0.471509	2.16086	0.864347	3.57539	1137.5	1.60372	0.534573	2.36371	0.945487	3.96743	-1.53257
1139	-0.5	0.5	1.43875	0.479585	1.84082	0.736329	3.27958	1138.5	1.42731	0.47577	1.98954	0.795815	3.41685	-2.08315		-0.295815	0		3.41686			1139	-0.5	0.5	1.43876	0.479585	1.84082	0.736329	3.27958	1138.5	1.42732	0.475771	1.98953	0.795814	3.41685	-2.08315
1140	-1.15648e-13	1	1.88132	0.627106	1.6974	0.678962	3.57872	1139.5	1.67231	0.557436	1.75213	0.700854	3.42444	-2.07556		0.299146	0		3.42446			1140	-1.15648e-13	1	1.88132	0.627106	1.6974	0.678962	3.57872	1139.5	1.67231	0.557436	1.75213	0.700854	3.42444	-2.07556
1141	0.5	1.5	2.62363	0.874544	1.76904	0.707616	4.39267	1140.5	2.27306	0.757686	1.71512	0.686049	3.98818	-1.51182		0.813951	0		3.98821			1141	0.5	1.5	2.62364	0.874544	1.76904	0.707616	4.39267	1140.5	2.27306	0.757686	1.71512	0.686049	3.98818	-1.51182
1142	0.866025	1.86603	3.46679	1.1556	2.03654	0.814615	5.50333	1141.5	3.06859	1.02286	1.88842	0.755367	4.95701	-0.542991		1.11066	0		4.95705			1142	0.866025	1.86603	3.4668	1.1556	2.03653	0.814615	5.50333	1141.5	3.0686	1.02286	1.88841	0.755367	4.95701	-0.542991
1143	1	2	4.18488	1.39496	2.42822	0.971287	6.6131	1142.5	3.84575	1.28192	2.22559	0.890235	6.07133	0.571333		1.10977	0		6.07137			1143	1	2	4.18488	1.39496	2.42821	0.971287	6.6131	1142.5	3.84575	1.28191	2.22558	0.890235	6.07133	0.571333
1144	0.866025	1.86603	4.58548	1.52849	2.83913	1.13565	7.42461	1143.5	4.39628	1.46543	2.63628	1.05451	7.03257	1.53257		0.811512	0		7.0326			1144	0.866025	1.86603	4.58548	1.52849	2.83913	1.13565	7.42461	1143.5	4.39629	1.46543	2.63628	1.05451	7.03257	1.53257
1145	0.5	1.5	4.56125	1.52042	3.15918	1.26367	7.72042	1144.5	4.57269	1.52423	3.01046	1.20419	7.58315	2.08315		0.295815	0		7.58317			1145	0.5	1.5	4.56125	1.52041	3.15917	1.26367	7.72042	1144.5	4.5727	1.52423	3.01046	1.20419	7.58315	2.08315
1146	1.27422e-14	1	4.11868	1.37289	3.3026	1.32104	7.42128	1145.5	4.32769	1.44256	3.24787	1.29915	7.57556	2.07556		-0.299146	0		7.57556			1146	1.27422e-14	1	4.11869	1.37289	3.30259	1.32104	7.42128	1145.5	4.3277	1.44256	3.24786	1.29915	7.57556	2.07556
1147	-0.5	0.5	3.37637	1.12546	3.23096	1.29238	6.60733	1146.5	3.72694	1.24231	3.28488	1.31395	7.01182	1.51182		-0.813951	0		7.01181			1147	-0.5	0.5	3.37638	1.12546	3.23095	1.29238	6.60733	1146.5	3.72695	1.24231	3.28487	1.31395	7.01182	1.51182
1148	-0.866025	0.133975	2.53321	0.844402	2.96346	1.18538	5.49667	1147.5	2.93141	0.977136	3.11158	1.24463	6.04299	0.542991		-1.11066	-1.11022e-15		6.04297			1148	-0.866025	0.133975	2.53321	0.844403	2.96346	1.18538	5.49667	1147.5	2.93142	0.977137	3.11157	1.24463	6.04299	0.542991
1149	-1	0	1.81512	0.60504	2.57178	1.02871	4.3869	1148.5	2.15425	0.718085	2.77441	1.10977	4.92867	-0.571333		-1.10977	4.44089e-16		4.92865			1149	-1	0	1.81513	0.605041	2.57178	1.02871	4.3869	1148.5	2.15426	0.718085	2.77441	1.10977	4.92867	-0.571333
1150	-0.866025	0.133975	1.41452	0.471508	2.16087	0.864347	3.57539	1149.5	1.60372	0.534572	2.36372	0.945487	3.96743	-1.53257		-0.811512	0		3.96743			1150	-0.866025	0.133975	1.41453	0.471509	2.16086	0.864347	3.57539	1149.5	1.60372	0.534573	2.36371	0.945487	3.96743	-1.53257
1151	-0.5	0.5	1.43875	0.479585	1.84082	0.736329	3.27958	1150.5	1.42731	0.47577	1.98954	0.795815	3.41685	-2.08315		-0.295815	0		3.41686			1151	-0.5	0.5	1.43876	0.479585	1.84082	0.736329	3.27958	1150.5	1.42732	0.475771	1.98953	0.795814	3.41685	-2.08315
1152	-2.35229e-14	1	1.88132	0.627106	1.6974	0.678962	3.57872	1151.5	1.67231	0.557436	1.75213	0.700854	3.42444	-2.07556		0.299146	0		3.42446			1152	-2.35229e-14	1	1.88132	0.627106	1.6974	0.678962	3.57872	1151.5	1.67231	0.557436	1.75213	0.700854	3.42444	-2.07556
1153	0.5	1.5	2.62363	0.874544	1.76904	0.707616	4.39267	1152.5	2.27306	0.757686	1.71512	0.686049	3.98818	-1.51182		0.813951	0		3.98821			1153	0.5	1.5	2.62364	0.874544	1.76904	0.707616	4.39267	1152.5	2.27306	0.757686	1.71512	0.686049	3.98818	-1.51182
1154	0.866025	1.86603	3.46679	1.1556	2.03654	0.814615	5.50333	1153.5	3.06859	1.02286	1.88842	0.755367	4.95701	-0.542991		1.11066	0		4.95705			1154	0.866025	1.86603	3.4668	1.1556	2.03653	0.814615	5.50333	1153.5	3.0686	1.02286	1.88841	0.755367	4.95701	-0.542991
1155	1	2	4.18488	1.39496	2.42822	0.971287	6.6131	1154.5	3.84575	1.28192	2.22559	0.890235	6.07133	0.571333		1.10977	0		6.07137			1155	1	2	4.18488	1.39496	2.42821	0.971287	6.6131	1154.5	3.84575	1.28191	2.22558	0.890235	6.07133	0.571333
1156	0.866025	1.86603	4.58548	1.52849	2.83913	1.13565	7.42461	1155.5	4.39628	1.46543	2.63628	1.05451	7.03257	1.53257		0.811512	0		7.0326			1156	0.866025	1.86603	4.58548	1.52849	2.83913	1.13565	7.42461	1155.5	4.39629	1.46543	2.63628	1.05451	7.03257	1.53257
1157	0.5	1.5	4.56125	1.52042	3.15918	1.26367	7.72042	1156.5	4.57269	1.52423	3.01046	1.20419	7.58315	2.08315		0.295815	0		7.58317			1157	0.5	1.5	4.56125	1.52041	3.15917	1.26367	7.72042	1156.5	4.5727	1.52423	3.01046	1.20419	7.58315	2.08315
1158	3.43035e-14	1	4.11868	1.37289	3.3026	1.32104	7.42128	1157.5	4.32769	1.44256	3.24787	1.29915	7.57556	2.07556		-0.299146	0		7.57556			1158	3.43035e-14	1	4.11869	1.37289	3.30259	1.32104	7.42128	1157.5	4.3277	1.44256	3.24786	1.29915	7.57556	2.07556
1159	-0.5	0.5	3.37637	1.12546	3.23096	1.29238	6.60733	1158.5	3.72694	1.24231	3.28488	1.31395	7.01182	1.51182		-0.813951	0		7.01181			1159	-0.5	0.5	3.37638	1.12546	3.23095	1.29238	6.60733	1158.5	3.72695	1.24231	3.28487	1.31395	7.01182	1.51182
1160	-0.866025	0.133975	2.53321	0.844402	2.96346	1.18538	5.49667	1159.5	2.93141	0.977136	3.11158	1.24463	6.04299	0.542991		-1.11066	2.22045e-16		6.04297			1160	-0.866025	0.133975	2.53321	0.844403	2.96346	1.18538	5.49667	1159.5	2.93142	0.977137	3.11157	1.24463	6.04299	0.542991
1161	-1	0	1.81512	0.60504	2.57178	1.02871	4.3869	1160.5	2.15425	0.718085	2.77441	1.10977	4.92867	-0.571333		-1.10977	-2.22045e-16		4.92865			1161	-1	0	1.81513	0.605041	2.57178	1.02871	4.3869	1160.5	2.15426	0.718085	2.77441	1.10977	4.92867	-0.571333
1162	-0.866025	0.133975	1.41452	0.471508	2.16087	0.864347	3.57539	1161.5	1.60372	0.534572	2.36372	0.945487	3.96743	-1.53257		-0.811512	-2.22045e-16		3.96743			1162	-0.866025	0.133975	1.41453	0.471509	2.16086	0.864347	3.57539	1161.5	1.60372	0.534573	2.36371	0.945487	3.96743	-1.53257
1163	-0.5	0.5	1.43875	0.479585	1.84082	0.736329	3.27958	1162.5	1.42731	0.47577	1.98954	0.795815	3.41685	-2.08315		-0.295815	0		3.41686			1163	-0.5	0.5	1.43876	0.479585	1.84082	0.736329	3.27958	1162.5	1.42732	0.475771	1.98953	0.795814	3.41685	-2.08315
1164	-4.50842e-14	1	1.88132	0.627106	1.6974	0.678962	3.57872	1163.5	1.67231	0.557436	1.75213	0.700854	3.42444	-2.07556		0.299146	0		3.42446			1164	-4.50842e-14	1	1.88132	0.627106	1.6974	0.678962	3.57872	1163.5	1.67231	0.557436	1.75213	0.700854	3.42444	-2.07556
1165	0.5	1.5	2.62363	0.874544	1.76904	0.707616	4.39267	1164.5	2.27306	0.757686	1.71512	0.686049	3.98818	-1.51182		0.813951	0		3.98821			1165	0.5	1.5	2.62364	0.874544	1.76904	0.707616	4.39267	1164.5	2.27306	0.757686	1.71512	0.686049	3.98818	-1.51182
1166	0.866025	1.86603	3.46679	1.1556	2.03654	0.814615	5.50333	1165.5	3.06859	1.02286	1.88842	0.755367	4.95701	-0.542991		1.11066	0		4.95705			1166	0.866025	1.86603	3.4668	1.1556	2.03653	0.814615	5.50333	1165.5	3.0686	1.02286	1.88841	0.755367	4.95701	-0.542991
1167	1	2	4.18488	1.39496	2.42822	0.971287	6.6131	1166.5	3.84575	1.28192	2.22559	0.890235	6.07133	0.571333		1.10977	0		6.07137			1167	1	2	4.18488	1.39496	2.42821	0.971287	6.6131	1166.5	3.84575	1.28191	2.22558	0.890235	6.07133	0.571333
1168	0.866025	1.86603	4.58548	1.52849	2.83913	1.13565	7.42461	1167.5	4.39628	1.46543	2.63628	1.05451	7.03257	1.53257		0.811512	0		7.0326			1168	0.866025	1.86603	4.58548	1.52849	2.83913	1.13565	7.42461	1167.5	4.39629	1.46543	2.63628	1.05451	7.03257	1.53257
1169	0.5	1.5	4.56125	1.52042	3.15918	1.26367	7.72042	1168.5	4.57269	1.52423	3.01046	1.20419	7.58315	2.08315		0.295815	0		7.58317			1169	0.5	1.5	4.56125	1.52041	3.15917	1.26367	7.72042	1168.5	4.5727	1.52423	3.01046	1.20419	7.58315	2.08315
1170	5.58648e-14	1	4.11868	1.37289	3.3026	1.32104	7.42128	1169.5	4.32769	1.44256	3.24787	1.29915	7.57556	2.07556		-0.299146	0		7.57556			1170	5.58648e-14	1	4.11869	1.37289	3.30259	1.32104	7.42128	1169.5	4.3277	1.44256	3.24786	1.29915	7.57556	2.07556
1171	-0.5	0.5	3.37637	1.12546	3.23096	1.29238	6.60733	1170.5	3.72694	1.24231	3.28488	1.31395	7.01182	1.51182		-0.813951	0		7.01181			1171	-0.5	0.5	3.37638	1.12546	3.23095	1.29238	6.60733	1170.5	3.72695	1.24231	3.28487	1.31395	7.01182	1.51182
1172	-0.866025	0.133975	2.53321	0.844402	2.96346	1.18538	5.49667	1171.5	2.93141	0.977136	3.11158	1.24463	6.04299	0.542991		-1.11066	3.33067e-16		6.04297			1172	-0.866025	0.133975	2.53321	0.844403	2.96346	1.18538	5.49667	1171.5	2.93142	0.977137	3.11157	1.24463	6.04299	0.542991
1173	-1	0	1.81512	0.60504	2.57178	1.02871	4.3869	1172.5	2.15425	0.718085	2.77441	1.10977	4.92867	-0.571333		-1.10977	4.44089e-16		4.92865			1173	-1	0	1.81513	0.605041	2.57178	1.02871	4.3869	1172.5	2.15426	0.718085	2.77441	1.10977	4.92867	-0.571333
1174	-0.866025	0.133975	1.41452	0.471508	2.16087	0.864347	3.57539	1173.5	1.60372	0.534572	2.36372	0.945487	3.96743	-1.53257		-0.811512	-4.44089e-16		3.96743			1174	-0.866025	0.133975	1.41453	0.471509	2.16086	0.864347	3.57539	1173.5	1.60372	0.534573	2.36371	0.945487	3.96743	-1.53257
1175	-0.5	0.5	1.43875	0.479585	1.84082	0.736329	3.27958	1174.5	1.42731	0.47577	1.98954	0.795815	3.41685	-2.08315		-0.295815	0		3.41686			1175	-0.5	0.5	1.43876	0.479585	1.84082	0.736329	3.27958	1174.5	1.42732	0.475771	1.98953	0.795814	3.41685	-2.08315
1176	-6.66455e-14	1	1.88132	0.627106	1.6974	0.678962	3.57872	1175.5	1.67231	0.557436	1.75213	0.700854	3.42444	-2.07556		0.299146	0		3.42446			1176	-6.66455e-14	1	1.88132	0.627106	1.6974	0.678962	3.57872	1175.5	1.67231	0.557436	1.75213	0.700854	3.42444	-2.07556
1177	0.5	1.5	2.62363	0.874544	1.76904	0.707616	4.39267	1176.5	2.27306	0.757686	1.71512	0.686049	3.98818	-1.51182		0.813951	0		3.98821			1177	0.5	1.5	2.62364	0.874544	1.76904	0.707616	4.39267	1176.5	2.27306	0.757686	1.71512	0.686049	3.98818	-1.51182
1178	0.866025	1.86603	3.46679	1.1556	2.03654	0.814615	5.50333	1177.5	3.06859	1.02286	1.88842	0.755367	4.95701	-0.542991		1.11066	0		4.95705			1178	0.866025	1.86603	3.4668	1.1556	2.03653	0.814615	5.50333	1177.5	3.0686	1.02286	1.88841	0.755367	4.95701	-0.542991
1179	1	2	4.18488	1.39496	2.42822	0.971287	6.6131	1178.5	3.84575	1.28192	2.22559	0.890235	6.07133	0.571333		1.10977	0		6.07137			1179	1	2	4.18488	1.39496	2.42821	0.971287	6.6131	1178.5	3.84575	1.28191	2.22558	0.890235	6.07133	0.571333
1180	0.866025	1.86603	4.58548	1.52849	2.83913	1.13565	7.42461	1179.5	4.39628	1.46543	2.63628	1.05451	7.03257	1.53257		0.811512	0		7.0326			1180	0.866025	1.86603	4.58548	1.52849	2.83913	1.13565	7.42461	1179.5	4.39629	1.46543	2.63628	1.05451	7.03257	1.53257
1181	0.5	1.5	4.56125	1.52042	3.15918	1.26367	7.72042	1180.5	4.57269	1.52423	3.01046	1.20419	7.58315	2.08315		0.295815	0		7.58317			1181	0.5	1.5	4.56125	1.52041	3.15917	1.26367	7.72042	1180.5	4.5727	1.52423	3.01046	1.20419	7.58315	2.08315
1182	7.74261e-14	1	4.11868	1.37289	3.3026	1.32104	7.42128	1181.5	4.32769	1.44256	3.24787	1.29915	7.57556	2.07556		-0.299146	0		7.57556			1182	7.74261e-14	1	4.11869	1.37289	3.30259	1.32104	7.42128	1181.5	4.3277	1.44256	3.24786	1.29915	7.57556	2.07556
1183	-0.5	0.5	3.37637	1.12546	3.23096	1.29238	6.60733	1182.5	3.72694	1.24231	3.28488	1.31395	7.01182	1.51182		-0.813951	-1.11022e-15		7.01181			1183	-0.5	0.5	3.37638	1.12546	3.23095	1.29238	6.60733	1182.5	3.72695	1.24231	3.28487	1.31395	7.01182	1.51182
1184	-0.866025	0.133975	2.53321	0.844402	2.96346	1.18538	5.49667	1183.5	2.93141	0.977136	3.11158	1.24463	6.04299	0.542991		-1.11066	0		6.04297			1184	-0.866025	0.133975	2.53321	0.844403	2.96346	1.18538	5.49667	1183.5	2.93142	0.977137	3.11157	1.24463	6.04299	0.542991
1185	-1	0	1.81512	0.60504	2.57178	1.02871	4.3869	1184.5	2.15425	0.718085	2.77441	1.10977	4.92867	-0.571333		-1.10977	0		4.92865			1185	-1	0	1.81513	0.605041	2.57178	1.02871	4.3869	1184.5	2.15426	0.718085	2.77441	1.10977	4.92867	-0.571333
1186	-0.866025	0.133975	1.41452	0.471508	2.16087	0.864347	3.57539	1185.5	1.60372	0.534572	2.36372	0.945487	3.96743	-1.53257		-0.811512	-4.44089e-16		3.96743			1186	-0.866025	0.133975	1.41453	0.471509	2.16086	0.864347	3.57539	1185.5	1.60372	0.534573	2.36371	0.945487	3.96743	-1.53257
1187	-0.5	0.5	1.43875	0.479585	1.84082	0.736329	3.27958	1186.5	1.42731	0.47577	1.98954	0.795815	3.41685	-2.08315		-0.295815	0		3.41686			1187	-0.5	0.5	1.43876	0.479585	1.84082	0.736329	3.27958	1186.5	1.42732	0.475771	1.98953	0.795814	3.41685	-2.08315
1188	-8.82068e-14	1	1.88132	0.627106	1.6974	0.678962	3.57872	1187.5	1.67231	0.557436	1.75213	0.700854	3.42444	-2.07556		0.299146	0		3.42446			1188	-8.82068e-14	1	1.88132	0.627106	1.6974	0.678962	3.57872	1187.5	1.67231	0.557436	1.75213	0.700854	3.42444	-2.07556
1189	0.5	1.5	2.62363	0.874544	1.76904	0.707616	4.39267	1188.5	2.27306	0.757686	1.71512	0.686049	3.98818	-1.51182		0.813951	0		3.98821			1189	0.5	1.5	2.62364	0.874544	1.76904	0.707616	4.39267	1188.5	2.27306	0.757686	1.71512	0.686049	3.98818	-1.51182
1190	0.866025	1.86603	3.46679	1.1556	2.03654	0.814615	5.50333	1189.5	3.06859	1.02286	1.88842	0.755367	4.95701	-0.542991		1.11066	0		4.95705			1190	0.866025	1.86603	3.4668	1.1556	2.03653	0.814615	5.50333	1189.5	3.0686	1.02286	1.88841	0.755367	4.95701	-0.542991
1191	1	2	4.18488	1.39496	2.42822	0.971287	6.6131	1190.5	3.84575	1.28192	2.22559	0.890235	6.07133	0.571333		1.10977	0		6.07137			1191	1	2	4.18488	1.39496	2.42821	0.971287	6.6131	1190.5	3.84575	1.28191	2.22558	0.890235	6.07133	0.571333
1192	0.866025	1.86603	4.58548	1.52849	2.83913	1.13565	7.42461	1191.5	4.39628	1.46543	2.63628	1.05451	7.03257	1.53257		0.811512	0		7.0326			1192	0.866025	1.86603	4.58548	1.52849	2.83913	1.13565	7.42461	1191.5	4.39629	1.46543	2.63628	1.05451	7.03257	1.53257
1193	0.5	1.5	4.56125	1.52042	3.15918	1.26367	7.72042	1192.5	4.57269	1.52423	3.01046	1.20419	7.58315	2.08315		0.295815	0		7.58317			1193	0.5	1.5	4.56125	1.52041	3.15917	1.26367	7.72042	1192.5	4.5727	1.52423	3.01046	1.20419	7.58315	2.08315
1194	9.89874e-14	1	4.11868	1.37289	3.3026	1.32104	7.42128	1193.5	4.32769	1.44256	3.24787	1.29915	7.57556	2.07556		-0.299146	0		7.57556			1194	9.89874e-14	1	4.11869	1.37289	3.30259	1.32104	7.42128	1193.5	4.3277	1.44256	3.24786	1.29915	7.57556	2.07556
1195	-0.5	0.5	3.37637	1.12546	3.23096	1.29238	6.60733	1194.5	3.72694	1.24231	3.28488	1.31395	7.01182	1.51182		-0.813951	0		7.01181			1195	-0.5	0.5	3.37638	1.12546	3.23095	1.29238	6.60733	1194.5	3.72695	1.24231	3.28487	1.31395	7.01182	1.51182
1196	-0.866025	0.133975	2.53321	0.844402	2.96346	1.18538	5.49667	1195.5	2.93141	0.977136	3.11158	1.24463	6.04299	0.542991		-1.11066	0		6.04297			1196	-0.866025	0.133975	2.53321	0.844403	2.96346	1.18538	5.49667	1195.5	2.93142	0.977137	3.11157	1.24463	6.04299	0.542991
1197	-1	0	1.81512	0.60504	2.57178	1.02871	4.3869	1196.5	2.15425	0.718085	2.77441	1.10977	4.92867	-0.571333		-1.10977	4.44089e-16		4.92865			1197	-1	0	1.81513	0.605041	2.57178	1.02871	4.3869	1196.5	2.15426	0.718085	2.77441	1.10977	4.92867	-0.571333
1198	-0.866025	0.133975	1.41452	0.471508	2.16087	0.864347	3.57539	1197.5	1.60372	0.534572	2.36372	0.945487	3.96743	-1.53257		-0.811512	-4.44089e-16		3.96743			1198	-0.866025	0.133975	1.41453	0.471509	2.16086	0.864347	3.57539	1197.5	1.60372	0.534573	2.36371	0.945487	3.96743	-1.53257
1199	-0.5	0.5	1.43875	0.479585	1.84082	0.736329	3.27958	1198.5	1.42731	0.47577	1.98954	0.795815	3.41685	-2.08315		-0.295815	0		3.41686			1199	-0.5	0.5	1.43876	0.479585	1.84082	0.736329	3.27958	1198.5	1.42732	0.475771	1.98953	0.795814	3.41685	-2.08315
1200	-1.09768e-13	1	1.88132	0.627106	1.6974	0.678962	3.57872	1199.5	1.67231	0.557436	1.75213	0.700854	3.42444	-2.07556		0.299146	0		3.42446			1200	-1.09768e-13	1	1.88132	0.627106	1.6974	0.678962	3.57872	1199.5	1.67231	0.557436	1.75213	0.700854	3.42444	-2.07556
1201	0.5	1.5	2.62363	0.874544	1.76904	0.707616	4.39267	1200.5	2.27306	0.757686	1.71512	0.686049	3.98818	-1.51182		0.813951	0		3.98821			1201	0.5	1.5	2.62364	0.874544	1.76904	0.707616	4.39267	1200.5	2.27306	0.757686	1.71512	0.686049	3.98818	-1.51182
1202	0.866025	1.86603	3.46679	1.1556	2.03654	0.814615	5.50333	1201.5	3.06859	1.02286	1.88842	0.755367	4.95701	-0.542991		1.11066	0		4.95705			1202	0.866025	1.86603	3.4668	1.1556	2.03653	0.814615	5.50333	1201.5	3.0686	1.02286	1.88841	0.755367	4.95701	-0.542991
1203	1	2	4.18488	1.39496	2.42822	0.971287	6.6131	1202.5	3.84575	1.28192	2.22559	0.890235	6.07133	0.571333		1.10977	0		6.07137			1203	1	2	4.18488	1.39496	2.42821	0.971287	6.6131	1202.5	3.84575	1.28191	2.22558	0.890235	6.07133	0.571333
1204	0.866025	1.86603	4.58548	1.52849	2.83913	1.13565	7.42461	1203.5	4.39628	1.46543	2.63628	1.05451	7.03257	1.53257		0.811512	0		7.0326			1204	0.866025	1.86603	4.58548	1.52849	2.83913	1.13565	7.42461	1203.5	4.39629	1.46543	2.63628	1.05451	7.03257	1.53257
1205	0.5	1.5	4.56125	1.52042	3.15918	1.26367	7.72042	1204.5	4.57269	1.52423	3.01046	1.20419	7.58315	2.08315		0.295815	0		7.58317			1205	0.5	1.5	4.56125	1.52041	3.15917	1.26367	7.72042	1204.5	4.5727	1.52423	3.01046	1.20419	7.58315	2.08315
1206	1.20549e-13	1	4.11868	1.37289	3.3026	1.32104	7.42128	1205.5	4.32769	1.44256	3.24787	1.29915	7.57556	2.07556		-0.299146	0		7.57556			1206	1.20549e-13	1	4.11869	1.37289	3.30259	1.32104	7.42128	1205.5	4.3277	1.44256	3.24786	1.29915	7.57556	2.07556
1207	-0.5	0.5	3.37637	1.12546	3.23096	1.29238	6.60733	1206.5	3.72694	1.24231	3.28488	1.31395	7.01182	1.51182		-0.813951	0		7.01181			1207	-0.5	0.5	3.37638	1.12546	3.23095	1.29238	6.60733	1206.5	3.72695	1.24231	3.28487	1.31395	7.01182	1.51182
1208	-0.866025	0.133975	2.53321	0.844402	2.96346	1.18538	5.49667	1207.5	2.93141	0.977136	3.11158	1.24463	6.04299	0.542991		-1.11066	2.22045e-16		6.04297			1208	-0.866025	0.133975	2.53321	0.844403	2.96346	1.18538	5.49667	1207.5	2.93142	0.977137	3.11157	1.24463	6.04299	0.542991
1209	-1	0	1.81512	0.60504	2.57178	1.02871	4.3869	1208.5	2.15425	0.718085	2.77441	1.10977	4.92867	-0.571333		-1.10977	-4.44089e-16		4.92865			1209	-1	0	1.81513	0.605041	2.57178	1.02871	4.3869	1208.5	2.15426	0.718085	2.77441	1.10977	4.92867	-0.571333
1210	-0.866025	0.133975	1.41452	0.471508	2.16087	0.864347	3.57539	1209.5	1.60372	0.534572	2.36372	0.945487	3.96743	-1.53257		-0.811512	0		3.96743			1210	-0.866025	0.133975	1.41453	0.471509	2.16086	0.864347	3.57539	1209.5	1.60372	0.534573	2.36371	0.945487	3.96743	-1.53257
1211	-0.5	0.5	1.43875	0.479585	1.84082	0.736329	3.27958	1210.5	1.42731	0.47577	1.98954	0.795815	3.41685	-2.08315		-0.295815	0		3.41686			1211	-0.5	0.5	1.43876	0.479585	1.84082	0.736329	3.27958	1210.5	1.42732	0.475771	1.98953	0.795814	3.41685	-2.08315
1212	-1.76426e-14	1	1.88132	0.627106	1.6974	0.678962	3.57872	1211.5	1.67231	0.557436	1.75213	0.700854	3.42444	-2.07556		0.299146	0		3.42446			1212	-1.76426e-14	1	1.88132	0.627106	1.6974	0.678962	3.57872	1211.5	1.67231	0.557436	1.75213	0.700854	3.42444	-2.07556
1213	0.5	1.5	2.62363	0.874544	1.76904	0.707616	4.39267	1212.5	2.27306	0.757686	1.71512	0.686049	3.98818	-1.51182		0.813951	0		3.98821			1213	0.5	1.5	2.62364	0.874544	1.76904	0.707616	4.39267	1212.5	2.27306	0.757686	1.71512	0.686049	3.98818	-1.51182
1214	0.866025	1.86603	3.46679	1.1556	2.03654	0.814615	5.50333	1213.5	3.06859	1.02286	1.88842	0.755367	4.95701	-0.542991		1.11066	0		4.95705			1214	0.866025	1.86603	3.4668	1.1556	2.03653	0.814615	5.50333	1213.5	3.0686	1.02286	1.88841	0.755367	4.95701	-0.542991
1215	1	2	4.18488	1.39496	2.42822	0.971287	6.6131	1214.5	3.84575	1.28192	2.22559	0.890235	6.07133	0.571333		1.10977	0		6.07137			1215	1	2	4.18488	1.39496	2.42821	0.971287	6.6131	1214.5	3.84575	1.28191	2.22558	0.890235	6.07133	0.571333
1216	0.866025	1.86603	4.58548	1.52849	2.83913	1.13565	7.42461	1215.5	4.39628	1.46543	2.63628	1.05451	7.03257	1.53257		0.811512	0		7.0326			1216	0.866025	1.86603	4.58548	1.52849	2.83913	1.13565	7.42461	1215.5	4.39629	1.46543	2.63628	1.05451	7.03257	1.53257
1217	0.5	1.5	4.56125	1.52042	3.15918	1.26367	7.72042	1216.5	4.57269	1.52423	3.01046	1.20419	7.58315	2.08315		0.295815	0		7.58317			1217	0.5	1.5	4.56125	1.52041	3.15917	1.26367	7.72042	1216.5	4.5727	1.52423	3.01046	1.20419	7.58315	2.08315
1218	2.84232e-14	1	4.11868	1.37289	3.3026	1.32104	7.42128	1217.5	4.32769	1.44256	3.24787	1.29915	7.57556	2.07556		-0.299146	0		7.57556			1218	2.84232e-14	1	4.11869	1.37289	3.30259	1.32104	7.42128	1217.5	4.3277	1.44256	3.24786	1.29915	7.57556	2.07556
1219	-0.5	0.5	3.37637	1.12546	3.23096	1.29238	6.60733	1218.5	3.72694	1.24231	3.28488	1.31395	7.01182	1.51182		-0.813951	-8.88178e-16		7.01181			1219	-0.5	0.5	3.37638	1.12546	3.23095	1.29238	6.60733	1218.5	3.72695	1.24231	3.28487	1.31395	7.01182	1.51182
1220	-0.866025	0.133975	2.53321	0.844402	2.96346	1.18538	5.49667	1219.5	2.93141	0.977136	3.11158	1.24463	6.04299	0.542991		-1.11066	3.33067e-16		6.04297			1220	-0.866025	0.133975	2.53321	0.844403	2.96346	1.18538	5.49667	1219.5	2.93142	0.977137	3.11157	1.24463	6.04299	0.542991
1221	-1	0	1.81512	0.60504	2.57178	1.02871	4.3869	1220.5	2.15425	0.718085	2.77441	1.10977	4.92867	-0.571333		-1.10977	-4.44089e-16		4.92865			1221	-1	0	1.81513	0.605041	2.57178	1.02871	4.3869	1220.5	2.15426	0.718085	2.77441	1.10977	4.92867	-0.571333
1222	-0.866025	0.133975	1.41452	0.471508	2.16087	0.864347	3.57539	1221.5	1.60372	0.534572	2.36372	0.945487	3.96743	-1.53257		-0.811512	5.55112e-16		3.96743			1222	-0.866025	0.133975	1.41453	0.471509	2.16086	0.864347	3.57539	1221.5	1.60372	0.534573	2.36371	0.945487	3.96743	-1.53257
1223	-0.5	0.5	1.43875	0.479585	1.84082	0.736329	3.27958	1222.5	1.42731	0.47577	1.98954	0.795815	3.41685	-2.08315		-0.295815	0		3.41686			1223	-0.5	0.5	1.43876	0.479585	1.84082	0.736329	3.27958	1222.5	1.42732	0.475771	1.98953	0.795814	3.41685	-2.08315
1224	-3.92039e-14	1	1.88132	0.627106	1.6974	0.678962	3.57872	1223.5	1.67231	0.557436	1.75213	0.700854	3.42444	-2.07556		0.299146	0		3.42446			1224	-3.92039e-14	1	1.88132	0.627106	1.6974	0.678962	3.57872	1223.5	1.67231	0.557436	1.75213	0.700854	3.42444	-2.07556
1225	0.5	1.5	2.62363	0.874544	1.76904	0.707616	4.39267	1224.5	2.27306	0.757686	1.71512	0.686049	3.98818	-1.51182		0.813951	0		3.98821			1225	0.5	1.5	2.62364	0.874544	1.76904	0.707616	4.39267	1224.5	2.27306	0.757686	1.71512	0.686049	3.98818	-1.51182
1226	0.866025	1.86603	3.46679	1.1556	2.03654	0.814615	5.50333	1225.5	3.06859	1.02286	1.88842	0.755367	4.95701	-0.542991		1.11066	0		4.95705			1226	0.866025	1.86603	3.4668	1.1556	2.03653	0.814615	5.50333	1225.5	3.0686	1.02286	1.88841	0.755367	4.95701	-0.542991
1227	1	2	4.18488	1.39496	2.42822	0.971287	6.6131	1226.5	3.84575	1.28192	2.22559	0.890235	6.07133	0.571333		1.10977	0		6.07137			1227	1	2	4.18488	1.39496	2.42821	0.971287	6.6131	1226.5	3.84575	1.28191	2.22558	0.890235	6.07133	0.571333
1228	0.866025	1.86603	4.58548	1.52849	2.83913	1.13565	7.42461	1227.5	4.39628	1.46543	2.63628	1.05451	7.03257	1.53257		0.811512	0		7.0326			1228	0.866025	1.86603	4.58548	1.52849	2.83913	1.13565	7.42461	1227.5	4.39629	1.46543	2.63628	1.05451	7.03257	1.53257
1229	0.5	1.5	4.56125	1.52042	3.15918	1.26367	7.72042	1228.5	4.57269	1.52423	3.01046	1.20419	7.58315	2.08315		0.295815	0		7.58317			1229	0.5	1.5	4.56125	1.52041	3.15917	1.26367	7.72042	1228.5	4.5727	1.52423	3.01046	1.20419	7.58315	2.08315
1230	4.99845e-14	1	4.11868	1.37289	3.3026	1.32104	7.42128	1229.5	4.32769	1.44256	3.24787	1.29915	7.57556	2.07556		-0.299146	0		7.57556			1230	4.99845e-14	1	4.11869	1.37289	3.30259	1.32104	7.42128	1229.5	4.3277	1.44256	3.24786	1.29915	7.57556	2.07556
1231	-0.5	0.5	3.37637	1.12546	3.23096	1.29238	6.60733	1230.5	3.72694	1.24231	3.28488	1.31395	7.01182	1.51182		-0.813951	0		7.01181			1231	-0.5	0.5	3.37638	1.12546	3.23095	1.29238	6.60733	1230.5	3.72695	1.24231	3.28487	1.31395	7.01182	1.51182
1232	-0.866025	0.133975	2.53321	0.844402	2.96346	1.18538	5.49667	1231.5	2.93141	0.977136	3.11158	1.24463	6.04299	0.542991		-1.11066	0		6.04297			1232	-0.866025	0.133975	2.53321	0.844403	2.96346	1.18538	5.49667	1231.5	2.93142	0.977137	3.11157	1.24463	6.04299	0.542991
1233	-1	0	1.81512	0.60504	2.57178	1.02871	4.3869	1232.5	2.15425	0.718085	2.77441	1.10977	4.92867	-0.571333		-1.10977	-2.22045e-16		4.92865			1233	-1	0	1.81513	0.605041	2.57178	1.02871	4.3869	1232.5	2.15426	0.718085	2.77441	1.10977	4.92867	-0.571333
1234	-0.866025	0.133975	1.41452	0.471508	2.16087	0.864347	3.57539	1233.5	1.60372	0.534572	2.36372	0.945487	3.96743	-1.53257		-0.811512	0		3.96743			1234	-0.866025	0.133975	1.41453	0.471509	2.16086	0.864347	3.57539	1233.5	1.60372	0.534573	2.36371	0.945487	3.96743	-1.53257
1235	-0.5	0.5	1.43875	0.479585	1.84082	0.736329	3.27958	1234.5	1.42731	0.47577	1.98954	0.795815	3.41685	-2.08315		-0.295815	0		3.41686			1235	-0.5	0.5	1.43876	0.479585	1.84082	0.736329	3.27958	1234.5	1.42732	0.475771	1.98953	0.795814	3.41685	-2.08315
1236	-6.07652e-14	1	1.88132	0.627106	1.6974	0.678962	3.57872	1235.5	1.67231	0.557436	1.75213	0.700854	3.42444	-2.07556		0.299146	0		3.42446			1236	-6.07652e-14	1	1.88132	0.627106	1.6974	0.678962	3.57872	1235.5	1.67231	0.557436	1.75213	0.700854	3.42444	-2.07556
1237	0.5	1.5	2.62363	0.874544	1.76904	0.707616	4.39267	1236.5	2.27306	0.757686	1.71512	0.686049	3.98818	-1.51182		0.813951	0		3.98821			1237	0.5	1.5	2.62364	0.874544	1.76904	0.707616	4.39267	1236.5	2.27306	0.757686	1.71512	0.686049	3.98818	-1.51182
1238	0.866025	1.86603	3.46679	1.1556	2.03654	0.814615	5.50333	1237.5	3.06859	1.02286	1.88842	0.755367	4.95701	-0.542991		1.11066	0		4.95705			1238	0.866025	1.86603	3.4668	1.1556	2.03653	0.814615	5.50333	1237.5	3.0686	1.02286	1.88841	0.755367	4.95701	-0.542991
1239	1	2	4.18488	1.39496	2.42822	0.971287	6.6131	1238.5	3.84575	1.28192	2.22559	0.890235	6.07133	0.571333		1.10977	0		6.07137			1239	1	2	4.18488	1.39496	2.42821	0.971287	6.6131	1238.5	3.84575	1.28191	2.22558	0.890235	6.07133	0.571333
1240	0.866025	1.86603	4.58548	1.52849	2.83913	1.13565	7.42461	1239.5	4.39628	1.46543	2.63628	1.05451	7.03257	1.53257		0.811512	0		7.0326			1240	0.866025	1.86603	4.58548	1.52849	2.83913	1.13565	7.42461	1239.5	4.39629	1.46543	2.63628	1.05451	7.03257	1.53257
1241	0.5	1.5	4.56125	1.52042	3.15918	1.26367	7.72042	1240.5	4.57269	1.52423	3.01046	1.20419	7.58315	2.08315		0.295815	0		7.58317			1241	0.5	1.5	4.56125	1.52041	3.15917	1.26367	7.72042	1240.5	4.5727	1.52423	3.01046	1.20419	7.58315	2.08315
1242	7.15459e-14	1	4.11868	1.37289	3.3026	1.32104	7.42128	1241.5	4.32769	1.44256	3.24787	1.29915	7.57556	2.07556		-0.299146	0		7.57556			1242	7.15459e-14	1	4.11869	1.37289	3.30259	1.32104	7.42128	1241.5	4.3277	1.44256	3.24786	1.29915	7.57556	2.07556
1243	-0.5	0.5	3.37637	1.12546	3.23096	1.29238	6.60733	1242.5	3.72694	1.24231	3.28488	1.31395	7.01182	1.51182		-0.813951	0		7.01181			1243	-0.5	0.5	3.37638	1.12546	3.23095	1.29238	6.60733	1242.5	3.72695	1.24231	3.28487	1.31395	7.01182	1.51182
1244	-0.866025	0.133975	2.53321	0.844402	2.96346	1.18538	5.49667	1243.5	2.93141	0.977136	3.11158	1.24463	6.04299	0.542991		-1.11066	0		6.04297			1244	-0.866025	0.133975	2.53321	0.844403	2.96346	1.18538	5.49667	1243.5	2.93142	0.977137	3.11157	1.24463	6.04299	0.542991
1245	-1	0	1.81512	0.60504	2.57178	1.02871	4.3869	1244.5	2.15425	0.718085	2.77441	1.10977	4.92867	-0.571333		-1.10977	0		4.92865			1245	-1	0	1.81513	0.605041	2.57178	1.02871	4.3869	1244.5	2.15426	0.718085	2.77441	1.10977	4.92867	-0.571333
1246	-0.866025	0.133975	1.41452	0.471508	2.16087	0.864347	3.57539	1245.5	1.60372	0.534572	2.36372	0.945487	3.96743	-1.53257		-0.811512	0		3.96743			1246	-0.866025	0.133975	1.41453	0.471509	2.16086	0.864347	3.57539	1245.5	1.60372	0.534573	2.36371	0.945487	3.96743	-1.53257
1247	-0.5	0.5	1.43875	0.479585	1.84082	0.736329	3.27958	1246.5	1.42731	0.47577	1.98954	0.795815	3.41685	-2.08315		-0.295815	0		3.41686			1247	-0.5	0.5	1.43876	0.479585	1.84082	0.736329	3.27958	1246.5	1.42732	0.475771	1.98953	0.795814	3.41685	-2.08315
1248	-8.23265e-14	1	1.88132	0.627106	1.6974	0.678962	3.57872	1247.5	1.67231	0.557436	1.75213	0.700854	3.42444	-2.07556		0.299146	0		3.42446			1248	-8.23265e-14	1	1.88132	0.627106	1.6974	0.678962	3.57872	1247.5	1.67231	0.557436	1.75213	0.700854	3.42444	-2.07556
1249	0.5	1.5	2.62363	0.874544	1.76904	0.707616	4.39267	1248.5	2.27306	0.757686	1.71512	0.686049	3.98818	-1.51182		0.813951	0		3.98821			1249	0.5	1.5	2.62364	0.874544	1.76904	0.707616	4.39267	1248.5	2.27306	0.757686	1.71512	0.686049	3.98818	-1.51182
1250	0.866025	1.86603	3.46679	1.1556	2.03654	0.814615	5.50333	1249.5	3.06859	1.02286	1.88842	0.755367	4.95701	-0.542991		1.11066	0		4.95705			1250	0.866025	1.86603	3.4668	1.1556	2.03653	0.814615	5.50333	1249.5	3.0686	1.02286	1.88841	0.755367	4.95701	-0.542991
1251	1	2	4.18488	1.39496	2.42822	0.971287	6.6131	1250.5	3.84575	1.28192	2.22559	0.890235	6.07133	0.571333		1.10977	0		6.07137			1251	1	2	4.18488	1.39496	2.42821	0.971287	6.6131	1250.5	3.84575	1.28191	2.22558	0.890235	6.07133	0.571333
1252	0.866025	1.86603	4.58548	1.52849	2.83913	1.13565	7.42461	1251.5	4.39628	1.46543	2.63628	1.05451	7.03257	1.53257		0.811512	0		7.0326			1252	0.866025	1.86603	4.58548	1.52849	2.83913	1.13565	7.42461	1251.5	4.39629	1.46543	2.63628	1.05451	7.03257	1.53257
1253	0.5	1.5	4.56125	1.52042	3.15918	1.26367	7.72042	1252.5	4.57269	1.52423	3.01046	1.20419	7.58315	2.08315		0.295815	0		7.58317			1253	0.5	1.5	4.56125	1.52041	3.15917	1.26367	7.72042	1252.5	4.5727	1.52423	3.01046	1.20419	7.58315	2.08315
1254	9.31072e-14	1	4.11868	1.37289	3.3026	1.32104	7.42128	1253.5	4.32769	1.44256	3.24787	1.29915	7.57556	2.07556		-0.299146	0		7.57556			1254	9.31072e-14	1	4.11869	1.37289	3.30259	1.32104	7.42128	1253.5	4.3277	1.44256	3.24786	1.29915	7.57556	2.07556
1255	-0.5	0.5	3.37637	1.12546	3.23096	1.29238	6.60733	1254.5	3.72694	1.24231	3.28488	1.31395	7.01182	1.51182		-0.813951	0		7.01181			1255	-0.5	0.5	3.37638	1.12546	3.23095	1.29238	6.60733	1254.5	3.72695	1.24231	3.28487	1.31395	7.01182	1.51182
1256	-0.866025	0.133975	2.53321	0.844402	2.96346	1.18538	5.49667	1255.5	2.93141	0.977136	3.11158	1.24463	6.04299	0.542991		-1.11066	-2.22045e-16		6.04297			1256	-0.866025	0.133975	2.53321	0.844403	2.96346	1.18538	5.49667	1255.5	2.93142	0.977137	3.11157	1.24463	6.04299	0.542991
1257	-1	0	1.81512	0.60504	2.57178	1.02871	4.3869	1256.5	2.15425	0.718085	2.77441	1.10977	4.92867	-0.571333		-1.10977	2.22045e-16		4.92865			1257	-1	0	1.81513	0.605041	2.57178	1.02871	4.3869	1256.5	2.15426	0.718085	2.77441	1.10977	4.92867	-0.571333
1258	-0.866025	0.133975	1.41452	0.471508	2.16087	0.864347	3.57539	1257.5	1.60372	0.534572	2.36372	0.945487	3.96743	-1.53257		-0.811512	-3.33067e-16		3.96743			1258	-0.866025	0.133975	1.41453	0.471509	2.16086	0.864347	3.57539	1257.5	1.60372	0.534573	2.36371	0.945487	3.96743	-1.53257
1259	-0.5	0.5	1.43875	0.479585	1.84082	0.736329	3.27958	1258.5	1.42731	0.47577	1.98954	0.795815	3.41685	-2.08315		-0.295815	0		3.41686			1259	-0.5	0.5	1.43876	0.479585	1.84082	0.736329	3.27958	1258.5	1.42732	0.475771	1.98953	0.795814	3.41685	-2.08315
1260	-1.03888e-13	1	1.88132	0.627106	1.6974	0.678962	3.57872	1259.5	1.67231	0.557436	1.75213	0.700854	3.42444	-2.07556		0.299146	0		3.42446			1260	-1.03888e-13	1	1.88132	0.627106	1.6974	0.678962	3.57872	1259.5	1.67231	0.557436	1.75213	0.700854	3.42444	-2.07556
1261	0.5	1.5	2.62363	0.874544	1.76904	0.707616	4.39267	1260.5	2.27306	0.757686	1.71512	0.686049	3.98818	-1.51182		0.813951	0		3.98821			1261	0.5	1.5	2.62364	0.874544	1.76904	0.707616	4.39267	1260.5	2.27306	0.757686	1.71512	0.686049	3.98818	-1.51182
1262	0.866025	1.86603	3.46679	1.1556	2.03654	0.814615	5.50333	1261.5	3.06859	1.02286	1.88842	0.755367	4.95701	-0.542991		1.11066	0		4.95705			1262	0.866025	1.86603	3.4668	1.1556	2.03653	0.814615	5.50333	1261.5	3.0686	1.02286	1.88841	0.755367	4.95701	-0.542991
1263	1	2	4.18488	1.39496	2.42822	0.971287	6.6131	1262.5	3.84575	1.28192	2.22559	0.890235	6.07133	0.571333		1.10977	0		6.07137			1263	1	2	4.18488	1.39496	2.42821	0.971287	6.6131	1262.5	3.84575	1.28191	2.22558	0.890235	6.07133	0.571333
1264	0.866025	1.86603	4.58548	1.52849	2.83913	1.13565	7.42461	1263.5	4.39628	1.46543	2.63628	1.05451	7.03257	1.53257		0.811512	0		7.0326			1264	0.866025	1.86603	4.58548	1.52849	2.83913	1.13565	7.42461	1263.5	4.39629	1.46543	2.63628	1.05451	7.03257	1.53257
1265	0.5	1.5	4.56125	1.52042	3.15918	1.26367	7.72042	1264.5	4.57269	1.52423	3.01046	1.20419	7.58315	2.08315		0.295815	0		7.58317			1265	0.5	1.5	4.56125	1.52041	3.15917	1.26367	7.72042	1264.5	4.5727	1.52423	3.01046	1.20419	7.58315	2.08315
1266	1.14668e-13	1	4.11868	1.37289	3.3026	1.32104	7.42128	1265.5	4.32769	1.44256	3.24787	1.29915	7.57556	2.07556		-0.299146	0		7.57556			1266	1.14668e-13	1	4.11869	1.37289	3.30259	1.32104	7.42128	1265.5	4.3277	1.44256	3.24786	1.29915	7.57556	2.07556
1267	-0.5	0.5	3.37637	1.12546	3.23096	1.29238	6.60733	1266.5	3.72694	1.24231	3.28488	1.31395	7.01182	1.51182		-0.813951	0		7.01181			1267	-0.5	0.5	3.37638	1.12546	3.23095	1.29238	6.60733	1266.5	3.72695	1.24231	3.28487	1.31395	7.01182	1.51182
1268	-0.866025	0.133975	2.53321	0.844402	2.96346	1.18538	5.49667	1267.5	2.93141	0.977136	3.11158	1.24463	6.04299	0.542991		-1.11066	-5.55112e-16		6.04297			1268	-0.866025	0.133975	2.53321	0.844403	2.96346	1.18538	5.49667	1267.5	2.93142	0.977137	3.11157	1.24463	6.04299	0.542991
1269	-1	0	1.81512	0.60504	2.57178	1.02871	4.3869	1268.5	2.15425	0.718085	2.77441	1.10977	4.92867	-0.571333		-1.10977	-4.44089e-16		4.92865			1269	-1	0	1.81513	0.605041	2.57178	1.02871	4.3869	1268.5	2.15426	0.718085	2.77441	1.10977	4.92867	-0.571333
1270	-0.866025	0.133975	1.41452	0.471508	2.16087	0.864347	3.57539	1269.5	1.60372	0.534572	2.36372	0.945487	3.96743	-1.53257		-0.811512	4.44089e-16		3.96743			1270	-0.866025	0.133975	1.41453	0.471509	2.16086	0.864347	3.57539	1269.5	1.60372	0.534573	2.36371	0.945487	3.96743	-1.53257
1271	-0.5	0.5	1.43875	0.479585	1.84082	0.736329	3.27958	1270.5	1.42731	0.47577	1.98954	0.795815	3.41685	-2.08315		-0.295815	0		3.41686			1271	-0.5	0.5	1.43876	0.479585	1.84082	0.736329	3.27958	1270.5	1.42732	0.475771	1.98953	0.795814	3.41685	-2.08315
1272	-1.25449e-13	1	1.88132	0.627106	1.6974	0.678962	3.57872	1271.5	1.67231	0.557436	1.75213	0.700854	3.42444	-2.07556		0.299146	0		3.42446			1272	-1.25449e-13	1	1.88132	0.627106	1.6974	0.678962	3.57872	1271.5	1.67231	0.557436	1.75213	0.700854	3.42444	-2.07556
1273	0.5	1.5	2.62363	0.874544	1.76904	0.707616	4.39267	1272.5	2.27306	0.757686	1.71512	0.686049	3.98818	-1.51182		0.813951	0		3.98821			1273	0.5	1.5	2.62364	0.874544	1.76904	0.707616	4.39267	1272.5	2.27306	0.757686	1.71512	0.686049	3.98818	-1.51182
1274	0.866025	1.86603	3.46679	1.1556	2.03654	0.814615	5.50333	1273.5	3.06859	1.02286	1.88842	0.755367	4.95701	-0.542991		1.11066	0		4.95705			1274	0.866025	1.86603	3.4668	1.1556	2.03653	0.814615	5.50333	1273.5	3.0686	1.02286	1.88841	0.755367	4.95701	-0.542991
1275	1	2	4.18488	1.39496	2.42822	0.971287	6.6131	1274.5	3.84575	1.28192	2.22559	0.890235	6.07133	0.571333		1.10977	0		6.07137			1275	1	2	4.18488	1.39496	2.42821	0.971287	6.6131	1274.5	3.84575	1.28191	2.22558	0.890235	6.07133	0.571333
1276	0.866025	1.86603	4.58548	1.52849	2.83913	1.13565	7.42461	1275.5	4.39628	1.46543	2.63628	1.05451	7.03257	1.53257		0.811512	0		7.0326			1276	0.866025	1.86603	4.58548	1.52849	2.83913	1.13565	7.42461	1275.5	4.39629	1.46543	2.63628	1.05451	7.03257	1.53257
1277	0.5	1.5	4.56125	1.52042	3.15918	1.26367	7.72042	1276.5	4.57269	1.52423	3.01046	1.20419	7.58315	2.08315		0.295815	0		7.58317			1277	0.5	1.5	4.56125	1.52041	3.15917	1.26367	7.72042	1276.5	4.5727	1.52423	3.01046	1.20419	7.58315	2.08315
1278	2.25429e-14	1	4.11868	1.37289	3.3026	1.32104	7.42128	1277.5	4.32769	1.44256	3.24787	1.29915	7.57556	2.07556		-0.299146	0		7.57556			1278	2.25429e-14	1	4.11869	1.37289	3.30259	1.32104	7.42128	1277.5	4.3277	1.44256	3.24786	1.29915	7.57556	2.07556
1279	-0.5	0.5	3.37637	1.12546	3.23096	1.29238	6.60733	1278.5	3.72694	1.24231	3.28488	1.31395	7.01182	1.51182		-0.813951	0		7.01181			1279	-0.5	0.5	3.37638	1.12546	3.23095	1.29238	6.60733	1278.5	3.72695	1.24231	3.28487	1.31395	7.01182	1.51182
1280	-0.866025	0.133975	2.53321	0.844402	2.96346	1.18538	5.49667	1279.5	2.93141	0.977136	3.11158	1.24463	6.04299	0.542991		-1.11066	0		6.04297			1280	-0.866025	0.133975	2.53321	0.844403	2.96346	1.18538	5.49667	1279.5	2.93142	0.977137	3.11157	1.24463	6.04299	0.542991
1281	-1	0	1.81512	0.60504	2.57178	1.02871	4.3869	1280.5	2.15425	0.718085	2.77441	1.10977	4.92867	-0.571333		-1.10977	8.88178e-16		4.92865			1281	-1	0	1.81513	0.605041	2.57178	1.02871	4.3869	1280.5	2.15426	0.718085	2.77441	1.10977	4.92867	-0.571333
1282	-0.866025	0.133975	1.41452	0.471508	2.16087	0.864347	3.57539	1281.5	1.60372	0.534572	2.36372	0.945487	3.96743	-1.53257		-0.811512	0		3.96743			1282	-0.866025	0.133975	1.41453	0.471509	2.16086	0.864347	3.57539	1281.5	1.60372	0.534573	2.36371	0.945487	3.96743	-1.53257
1283	-0.5	0.5	1.43875	0.479585	1.84082	0.736329	3.27958	1282.5	1.42731	0.47577	1.98954	0.795815	3.41685	-2.08315		-0.295815	0		3.41686			1283	-0.5	0.5	1.43876	0.479585	1.84082	0.736329	3.27958	1282.5	1.42732	0.475771	1.98953	0.795814	3.41685	-2.08315
1284	-3.33236e-14	1	1.88132	0.627106	1.6974	0.678962	3.57872	1283.5	1.67231	0.557436	1.75213	0.700854	3.42444	-2.07556		0.299146	0		3.42446			1284	-3.33236e-14	1	1.88132	0.627106	1.6974	0.678962	3.57872	1283.5	1.67231	0.557436	1.75213	0.700854	3.42444	-2.07556
1285	0.5	1.5	2.62363	0.874544	1.76904	0.707616	4.39267	1284.5	2.27306	0.757686	1.71512	0.686049	3.98818	-1.51182		0.813951	0		3.98821			1285	0.5	1.5	2.62364	0.874544	1.76904	0.707616	4.39267	1284.5	2.27306	0.757686	1.71512	0.686049	3.98818	-1.51182
1286	0.866025	1.86603	3.46679	1.1556	2.03654	0.814615	5.50333	1285.5	3.06859	1.02286	1.88842	0.755367	4.95701	-0.542991		1.11066	0		4.95705			1286	0.866025	1.86603	3.4668	1.1556	2.03653	0.814615	5.50333	1285.5	3.0686	1.02286	1.88841	0.755367	4.95701	-0.542991
1287	1	2	4.18488	1.39496	2.42822	0.971287	6.6131	1286.5	3.84575	1.28192	2.22559	0.890235	6.07133	0.571333		1.10977	0		6.07137			1287	1	2	4.18488	1.39496	2.42821	0.971287	6.6131	1286.5	3.84575	1.28191	2.22558	0.890235	6.07133	0.571333
1288	0.866025	1.86603	4.58548	1.52849	2.83913	1.13565	7.42461	1287.5	4.39628	1.46543	2.63628	1.05451	7.03257	1.53257		0.811512	0		7.0326			1288	0.866025	1.86603	4.58548	1.52849	2.83913	1.13565	7.42461	1287.5	4.39629	1.46543	2.63628	1.05451	7.03257	1.53257
1289	0.5	1.5	4.56125	1.52042	3.15918	1.26367	7.72042	1288.5	4.57269	1.52423	3.01046	1.20419	7.58315	2.08315		0.295815	0		7.58317			1289	0.5	1.5	4.56125	1.52041	3.15917	1.26367	7.72042	1288.5	4.5727	1.52423	3.01046	1.20419	7.58315	2.08315
1290	4.41043e-14	1	4.11868	1.37289	3.3026	1.32104	7.42128	1289.5	4.32769	1.44256	3.24787	1.29915	7.57556	2.07556		-0.299146	0		7.57556			1290	4.41043e-14	1	4.11869	1.37289	3.30259	1.32104	7.42128	1289.5	4.3277	1.44256	3.24786	1.29915	7.57556	2.07556
1291	-0.5	0.5	3.37637	1.12546	3.23096	1.29238	6.60733	1290.5	3.72694	1.24231	3.28488	1.31395	7.01182	1.51182		-0.813951	0		7.01181			1291	-0.5	0.5	3.37638	1.12546	3.23095	1.29238	6.60733	1290.5	3.72695	1.24231	3.28487	1.31395	7.01182	1.51182
1292	-0.866025	0.133975	2.53321	0.844402	2.96346	1.18538	5.49667	1291.5	2.93141	0.977136	3.11158	1.24463	6.04299	0.542991		-1.11066	2.22045e-16		6.04297			1292	-0.866025	0.133975	2.53321	0.844403	2.96346	1.18538	5.49667	1291.5	2.93142	0.977137	3.11157	1.24463	6.04299	0.542991
1293	-1	0	1.81512	0.60504	2.57178	1.02871	4.3869	1292.5	2.15425	0.718085	2.77441	1.10977	4.92867	-0.571333		-1.10977	0		4.92865			1293	-1	0	1.81513	0.605041	2.57178	1.02871	4.3869	1292.5	2.15426	0.718085	2.77441	1.10977	4.92867	-0.571333
1294	-0.866025	0.133975	1.41452	0.471508	2.16087	0.864347	3.57539	1293.5	1.60372	0.534572	2.36372	0.945487	3.96743	-1.53257		-0.811512	-2.22045e-16		3.96743			1294	-0.866025	0.133975	1.41453	0.471509	2.16086	0.864347	3.57539	1293.5	1.60372	0.534573	2.36371	0.945487	3.96743	-1.53257
1295	-0.5	0.5	1.43875	0.479585	1.84082	0.736329	3.27958	1294.5	1.42731	0.47577	1.98954	0.795815	3.41685	-2.08315		-0.295815	0		3.41686			1295	-0.5	0.5	1.43876	0.479585	1.84082	0.736329	3.27958	1294.5	1.42732	0.475771	1.98953	0.795814	3.41685	-2.08315
1296	-5.48849e-14	1	1.88132	0.627106	1.6974	0.678962	3.57872	1295.5	1.67231	0.557436	1.75213	0.700854	3.42444	-2.07556		0.299146	0		3.42446			1296	-5.48849e-14	1	1.88132	0.627106	1.6974	0.678962	3.57872	1295.5	1.67231	0.557436	1.75213	0.700854	3.42444	-2.07556
1297	0.5	1.5	2.62363	0.874544	1.76904	0.707616	4.39267	1296.5	2.27306	0.757686	1.71512	0.686049	3.98818	-1.51182		0.813951	0		3.98821			1297	0.5	1.5	2.62364	0.874544	1.76904	0.707616	4.39267	1296.5	2.27306	0.757686	1.71512	0.686049	3.98818	-1.51182
1298	0.866025	1.86603	3.46679	1.1556	2.03654	0.814615	5.50333	1297.5	3.06859	1.02286	1.88842	0.755367	4.95701	-0.542991		1.11066	0		4.95705			1298	0.866025	1.86603	3.4668	1.1556	2.03653	0.814615	5.50333	1297.5	3.0686	1.02286	1.88841	0.755367	4.95701	-0.542991
1299	1	2	4.18488	1.39496	2.42822	0.971287	6.6131	1298.5	3.84575	1.28192	2.22559	0.890235	6.07133	0.571333		1.10977	0		6.07137			1299	1	2	4.18488	1.39496	2.42821	0.971287	6.6131	1298.5	3.84575	1.28191	2.22558	0.890235	6.07133	0.571333
1300	0.866025	1.86603	4.58548	1.52849	2.83913	1.13565	7.42461	1299.5	4.39628	1.46543	2.63628	1.05451	7.03257	1.53257		0.811512	0		7.0326			1300	0.866025	1.86603	4.58548	1.52849	2.83913	1.13565	7.42461	1299.5	4.39629	1.46543	2.63628	1.05451	7.03257	1.53257
1301	0.5	1.5	4.56125	1.52042	3.15918	1.26367	7.72042	1300.5	4.57269	1.52423	3.01046	1.20419	7.58315	2.08315		0.295815	0		7.58317			1301	0.5	1.5	4.56125	1.52041	3.15917	1.26367	7.72042	1300.5	4.5727	1.52423	3.01046	1.20419	7.58315	2.08315
1302	6.56656e-14	1	4.11868	1.37289	3.3026	1.32104	7.42128	1301.5	4.32769	1.44256	3.24787	1.29915	7.57556	2.07556		-0.299146	0		7.57556			1302	6.56656e-14	1	4.11869	1.37289	3.30259	1.32104	7.42128	1301.5	4.3277	1.44256	3.24786	1.29915	7.57556	2.07556
1303	-0.5	0.5	3.37637	1.12546	3.23096	1.29238	6.60733	1302.5	3.72694	1.24231	3.28488	1.31395	7.01182	1.51182		-0.813951	0		7.01181			1303	-0.5	0.5	3.37638	1.12546	3.23095	1.29238	6.60733	1302.5	3.72695	1.24231	3.28487	1.31395	7.01182	1.51182
1304	-0.866025	0.133975	2.53321	0.844402	2.96346	1.18538	5.49667	1303.5	2.93141	0.977136	3.11158	1.24463	6.04299	0.542991		-1.11066	7.77156e-16		6.04297			1304	-0.866025	0.133975	2.53321	0.844403	2.96346	1.18538	5.49667	1303.5	2.93142	0.977137	3.11157	1.24463	6.04299	0.542991
1305	-1	0	1.81512	0.60504	2.57178	1.02871	4.3869	1304.5	2.15425	0.718085	2.77441	1.10977	4.92867	-0.571333		-1.10977	-4.44089e-16		4.92865			1305	-1	0	1.81513	0.605041	2.57178	1.02871	4.3869	1304.5	2.15426	0.718085	2.77441	1.10977	4.92867	-0.571333
1306	-0.866025	0.133975	1.41452	0.471508	2.16087	0.864347	3.57539	1305.5	1.60372	0.534572	2.36372	0.945487	3.96743	-1.53257		-0.811512	-6.66134e-16		3.96743			1306	-0.866025	0.133975	1.41453	0.471509	2.16086	0.864347	3.57539	1305.5	1.60372	0.534573	2.36371	0.945487	3.96743	-1.53257
1307	-0.5	0.5	1.43875	0.479585	1.84082	0.736329	3.27958	1306.5	1.42731	0.47577	1.98954	0.795815	3.41685	-2.08315		-0.295815	0		3.41686			1307	-0.5	0.5	1.43876	0.479585	1.84082	0.736329	3.27958	1306.5	1.42732	0.475771	1.98953	0.795814	3.41685	-2.08315
1308	-7.64462e-14	1	1.88132	0.627106	1.6974	0.678962	3.57872	1307.5	1.67231	0.557436	1.75213	0.700854	3.42444	-2.07556		0.299146	0		3.42446			1308	-7.64462e-14	1	1.88132	0.627106	1.6974	0.678962	3.57872	1307.5	1.67231	0.557436	1.75213	0.700854	3.42444	-2.07556
1309	0.5	1.5	2.62363	0.874544	1.76904	0.707616	4.39267	1308.5	2.27306	0.757686	1.71512	0.686049	3.98818	-1.51182		0.813951	0		3.98821			1309	0.5	1.5	2.62364	0.874544	1.76904	0.707616	4.39267	1308.5	2.27306	0.757686	1.71512	0.686049	3.98818	-1.51182
1310	0.866025	1.86603	3.46679	1.1556	2.03654	0.814615	5.50333	1309.5	3.06859	1.02286	1.88842	0.755367	4.95701	-0.542991		1.11066	0		4.95705			1310	0.866025	1.86603	3.4668	1.1556	2.03653	0.814615	5.50333	1309.5	3.0686	1.02286	1.88841	0.755367	4.95701	-0.542991
1311	1	2	4.18488	1.39496	2.42822	0.971287	6.6131	1310.5	3.84575	1.28192	2.22559	0.890235	6.07133	0.571333		1.10977	0		6.07137			1311	1	2	4.18488	1.39496	2.42821	0.971287	6.6131	1310.5	3.84575	1.28191	2.22558	0.890235	6.07133	0.571333
1312	0.866025	1.86603	4.58548	1.52849	2.83913	1.13565	7.42461	1311.5	4.39628	1.46543	2.63628	1.05451	7.03257	1.53257		0.811512	0		7.0326			1312	0.866025	1.86603	4.58548	1.52849	2.83913	1.13565	7.42461	1311.5	4.39629	1.46543	2.63628	1.05451	7.03257	1.53257
1313	0.5	1.5	4.56125	1.52042	3.15918	1.26367	7.72042	1312.5	4.57269	1.52423	3.01046	1.20419	7.58315	2.08315		0.295815	0		7.58317			1313	0.5	1.5	4.56125	1.52041	3.15917	1.26367	7.72042	1312.5	4.5727	1.52423	3.01046	1.20419	7.58315	2.08315
1314	8.72269e-14	1	4.11868	1.37289	3.3026	1.32104	7.42128	1313.5	4.32769	1.44256	3.24787	1.29915	7.57556	2.07556		-0.299146	0		7.57556			1314	8.72269e-14	1	4.11869	1.37289	3.30259	1.32104	7.42128	1313.5	4.3277	1.44256	3.24786	1.29915	7.57556	2.07556
1315	-0.5	0.5	3.37637	1.12546	3.23096	1.29238	6.60733	1314.5	3.72694	1.24231	3.28488	1.31395	7.01182	1.51182		-0.813951	0		7.01181			1315	-0.5	0.5	3.37638	1.12546	3.23095	1.29238	6.60733	1314.5	3.72695	1.24231	3.28487	1.31395	7.01182	1.51182
1316	-0.866025	0.133975	2.53321	0.844402	2.96346	1.18538	5.49667	1315.5	2.93141	0.977136	3.11158	1.24463	6.04299	0.542991		-1.11066	8.88178e-16		6.04297			1316	-0.866025	0.133975	2.53321	0.844403	2.96346	1.18538	5.49667	1315.5	2.93142	0.977137	3.11157	1.24463	6.04299	0.542991
1317	-1	0	1.81512	0.60504	2.57178	1.02871	4.3869	1316.5	2.15425	0.718085	2.77441	1.10977	4.92867	-0.571333		-1.10977	2.22045e-16		4.92865			1317	-1	0	1.81513	0.605041	2.57178	1.02871	4.3869	1316.5	2.15426	0.718085	2.77441	1.10977	4.92867	-0.571333
1318	-0.866025	0.133975	1.41452	0.471508	2.16087	0.864347	3.57539	1317.5	1.60372	0.534572	2.36372	0.945487	3.96743	-1.53257		-0.811512	4.44089e-16		3.96743			1318	-0.866025	0.133975	1.41453	0.471509	2.16086	0.864347	3.57539	1317.5	1.60372	0.534573	2.36371	0.945487	3.96743	-1.53257
1319	-0.5	0.5	1.43875	0.479585	1.84082	0.736329	3.27958	1318.5	1.42731	0.47577	1.98954	0.795815	3.41685	-2.08315		-0.295815	0		3.41686			1319	-0.5	0.5	1.43876	0.479585	1.84082	0.736329	3.27958	1318.5	1.42732	0.475771	1.98953	0.795814	3.41685	-2.08315
1320	-9.80075e-14	1	1.88132	0.627106	1.6974	0.678962	3.57872	1319.5	1.67231	0.557436	1.75213	0.700854	3.42444	-2.07556		0.299146	0		3.42446			1320	-9.80075e-14	1	1.88132	0.627106	1.6974	0.678962	3.57872	1319.5	1.67231	0.557436	1.75213	0.700854	3.42444	-2.07556
1321	0.5	1.5	2.62363	0.874544	1.76904	0.707616	4.39267	1320.5	2.27306	0.757686	1.71512	0.686049	3.98818	-1.51182		0.813951	0		3.98821			1321	0.5	1.5	2.62364	0.874544	1.76904	0.707616	4.39267	1320.5	2.27306	0.757686	1.71512	0.686049	3.98818	-1.51182
1322	0.866025	1.86603	3.46679	1.1556	2.03654	0.814615	5.50333	1321.5	3.06859	1.02286	1.88842	0.755367	4.95701	-0.542991		1.11066	0		4.95705			1322	0.866025	1.86603	3.4668	1.1556	2.03653	0.814615	5.50333	1321.5	3.0686	1.02286	1.88841	0.755367	4.95701	-0.542991
1323	1	2	4.18488	1.39496	2.42822	0.971287	6.6131	1322.5	3.84575	1.28192	2.22559	0.890235	6.07133	0.571333		1.10977	0		6.07137			1323	1	2	4.18488	1.39496	2.42821	0.971287	6.6131	1322.5	3.84575	1.28191	2.22558	0.890235	6.07133	0.571333
1324	0.866025	1.86603	4.58548	1.52849	2.83913	1.13565	7.42461	1323.5	4.39628	1.46543	2.63628	1.05451	7.03257	1.53257		0.811512	0		7.0326			1324	0.866025	1.86603	4.58548	1.52849	2.83913	1.13565	7.42461	1323.5	4.39629	1.46543	2.63628	1.05451	7.03257	1.53257
1325	0.5	1.5	4.56125	1.52042	3.15918	1.26367	7.72042	1324.5	4.57269	1.52423	3.01046	1.20419	7.58315	2.08315		0.295815	0		7.58317			1325	0.5	1.5	4.56125	1.52041	3.15917	1.26367	7.72042	1324.5	4.5727	1.52423	3.01046	1.20419	7.58315	2.08315
1326	1.08788e-13	1	4.11868	1.37289	3.3026	1.32104	7.42128	1325.5	4.32769	1.44256	3.24787	1.29915	7.57556	2.07556		-0.299146	0		7.57556			1326	1.08788e-13	1	4.11869	1.37289	3.30259	1.32104	7.42128	1325.5	4.3277	1.44256	3.24786	1.29915	7.57556	2.07556
1327	-0.5	0.5	3.37637	1.12546	3.23096	1.29238	6.60733	1326.5	3.72694	1.24231	3.28488	1.31395	7.01182	1.51182		-0.813951	0		7.01181			1327	-0.5	0.5	3.37638	1.12546	3.23095	1.29238	6.60733	1326.5	3.72695	1.24231	3.28487	1.31395	7.01182	1.51182
1328	-0.866025	0.133975	2.53321	0.844402	2.96346	1.18538	5.49667	1327.5	2.93141	0.977136	3.11158	1.24463	6.04299	0.542991		-1.11066	-9.99201e-16		6.04297			1328	-0.866025	0.133975	2.53321	0.844403	2.96346	1.18538	5.49667	1327.5	2.93142	0.977137	3.11157	1.24463	6.04299	0.542991
1329	-1	0	1.81512	0.60504	2.57178	1.02871	4.3869	1328.5	2.15425	0.718085	2.77441	1.10977	4.92867	-0.571333		-1.10977	-4.44089e-16		4.92865			1329	-1	0	1.81513	0.605041	2.57178	1.02871	4.3869	1328.5	2.15426	0.718085	2.77441	1.10977	4.92867	-0.571333
1330	-0.866025	0.133975	1.41452	0.471508	2.16087	0.864347	3.57539	1329.5	1.60372	0.534572	2.36372	0.945487	3.96743	-1.53257		-0.811512	4.44089e-16		3.96743			1330	-0.866025	0.133975	1.41453	0.471509	2.16086	0.864347	3.57539	1329.5	1.60372	0.534573	2.36371	0.945487	3.96743	-1.53257
1331	-0.5	0.5	1.43875	0.479585	1.84082	0.736329	3.27958	1330.5	1.42731	0.47577	1.98954	0.795815	3.41685	-2.08315		-0.295815	0		3.41686			1331	-0.5	0.5	1.43876	0.479585	1.84082	0.736329	3.27958	1330.5	1.42732	0.475771	1.98953	0.795814	3.41685	-2.08315
1332	-1.19569e-13	1	1.88132	0.627106	1.6974	0.678962	3.57872	1331.5	1.67231	0.557436	1.75213	0.700854	3.42444	-2.07556		0.299146	0		3.42446			1332	-1.19569e-13	1	1.88132	0.627106	1.6974	0.678962	3.57872	1331.5	1.67231	0.557436	1.75213	0.700854	3.42444	-2.07556
1333	0.5	1.5	2.62363	0.874544	1.76904	0.707616	4.39267	1332.5	2.27306	0.757686	1.71512	0.686049	3.98818	-1.51182		0.813951	0		3.98821			1333	0.5	1.5	2.62364	0.874544	1.76904	0.707616	4.39267	1332.5	2.27306	0.757686	1.71512	0.686049	3.98818	-1.51182
1334	0.866025	1.86603	3.46679	1.1556	2.03654	0.814615	5.50333	1333.5	3.06859	1.02286	1.88842	0.755367	4.95701	-0.542991		1.11066	0		4.95705			1334	0.866025	1.86603	3.4668	1.1556	2.03653	0.814615	5.50333	1333.5	3.0686	1.02286	1.88841	0.755367	4.95701	-0.542991
1335	1	2	4.18488	1.39496	2.42822	0.971287	6.6131	1334.5	3.84575	1.28192	2.22559	0.890235	6.07133	0.571333		1.10977	0		6.07137			1335	1	2	4.18488	1.39496	2.42821	0.971287	6.6131	1334.5	3.84575	1.28191	2.22558	0.890235	6.07133	0.571333
1336	0.866025	1.86603	4.58548	1.52849	2.83913	1.13565	7.42461	1335.5	4.39628	1.46543	2.63628	1.05451	7.03257	1.53257		0.811512	0		7.0326			1336	0.866025	1.86603	4.58548	1.52849	2.83913	1.13565	7.42461	1335.5	4.39629	1.46543	2.63628	1.05451	7.03257	1.53257
1337	0.5	1.5	4.56125	1.52042	3.15918	1.26367	7.72042	1336.5	4.57269	1.52423	3.01046	1.20419	7.58315	2.08315		0.295815	0		7.58317			1337	0.5	1.5	4.56125	1.52041	3.15917	1.26367	7.72042	1336.5	4.5727	1.52423	3.01046	1.20419	7.58315	2.08315
1338	1.3035e-13	1	4.11868	1.37289	3.3026	1.32104	7.42128	1337.5	4.32769	1.44256	3.24787	1.29915	7.57556	2.07556		-0.299146	0		7.57556			1338	1.3035e-13	1	4.11869	1.37289	3.30259	1.32104	7.42128	1337.5	4.3277	1.44256	3.24786	1.29915	7.57556	2.07556
1339	-0.5	0.5	3.37637	1.12546	3.23096	1.29238	6.60733	1338.5	3.72694	1.24231	3.28488	1.31395	7.01182	1.51182		-0.813951	0		7.01181			1339	-0.5	0.5	3.37638	1.12546	3.23095	1.29238	6.60733	1338.5	3.72695	1.24231	3.28487	1.31395	7.01182	1.51182
1340	-0.866025	0.133975	2.53321	0.844402	2.96346	1.18538	5.49667	1339.5	2.93141	0.977136	3.11158	1.24463	6.04299	0.542991		-1.11066	2.22045e-16		6.04297			1340	-0.866025	0.133975	2.53321	0.844403	2.96346	1.18538	5.49667	1339.5	2.93142	0.977137	3.11157	1.24463	6.04299	0.542991
1341	-1	0	1.81512	0.60504	2.57178	1.02871	4.3869	1340.5	2.15425	0.718085	2.77441	1.10977	4.92867	-0.571333		-1.10977	-2.22045e-16		4.92865			1341	-1	0	1.81513	0.605041	2.57178	1.02871	4.3869	1340.5	2.15426	0.718085	2.77441	1.10977	4.92867	-0.571333
1342	-0.866025	0.133975	1.41452	0.471508	2.16087	0.864347	3.57539	1341.5	1.60372	0.534572	2.36372	0.945487	3.96743	-1.53257		-0.811512	0		3.96743			1342	-0.866025	0.133975	1.41453	0.471509	2.16086	0.864347	3.57539	1341.5	1.60372	0.534573	2.36371	0.945487	3.96743	-1.53257
1343	-0.5	0.5	1.43875	0.479585	1.84082	0.736329	3.27958	1342.5	1.42731	0.47577	1.98954	0.795815	3.41685	-2.08315		-0.295815	0		3.41686			1343	-0.5	0.5	1.43876	0.479585	1.84082	0.736329	3.27958	1342.5	1.42732	0.475771	1.98953	0.795814	3.41685	-2.08315
1344	-2.74433e-14	1	1.88132	0.627106	1.6974	0.678962	3.57872	1343.5	1.67231	0.557436	1.75213	0.700854	3.42444	-2.07556		0.299146	0		3.42446			1344	-2.74433e-14	1	1.88132	0.627106	1.6974	0.678962	3.57872	1343.5	1.67231	0.557436	1.75213	0.700854	3.42444	-2.07556
1345	0.5	1.5	2.62363	0.874544	1.76904	0.707616	4.39267	1344.5	2.27306	0.757686	1.71512	0.686049	3.98818	-1.51182		0.813951	0		3.98821			1345	0.5	1.5	2.62364	0.874544	1.76904	0.707616	4.39267	1344.5	2.27306	0.757686	1.71512	0.686049	3.98818	-1.51182
1346	0.866025	1.86603	3.46679	1.1556	2.03654	0.814615	5.50333	1345.5	3.06859	1.02286	1.88842	0.755367	4.95701	-0.542991		1.11066	0		4.95705			1346	0.866025	1.86603	3.4668	1.1556	2.03653	0.814615	5.50333	1345.5	3.0686	1.02286	1.88841	0.755367	4.95701	-0.542991
1347	1	2	4.18488	1.39496	2.42822	0.971287	6.6131	1346.5	3.84575	1.28192	2.22559	0.890235	6.07133	0.571333		1.10977	0		6.07137			1347	1	2	4.18488	1.39496	2.42821	0.971287	6.6131	1346.5	3.84575	1.28191	2.22558	0.890235	6.07133	0.571333
1348	0.866025	1.86603	4.58548	1.52849	2.83913	1.13565	7.42461	1347.5	4.39628	1.46543	2.63628	1.05451	7.03257	1.53257		0.811512	0		7.0326			1348	0.866025	1.86603	4.58548	1.52849	2.83913	1.13565	7.42461	1347.5	4.39629	1.46543	2.63628	1.05451	7.03257	1.53257
1349	0.5	1.5	4.56125	1.52042	3.15918	1.26367	7.72042	1348.5	4.57269	1.52423	3.01046	1.20419	7.58315	2.08315		0.295815	0		7.58317			1349	0.5	1.5	4.56125	1.52041	3.15917	1.26367	7.72042	1348.5	4.5727	1.52423	3.01046	1.20419	7.58315	2.08315
1350	3.8224e-14	1	4.11868	1.37289	3.3026	1.32104	7.42128	1349.5	4.32769	1.44256	3.24787	1.29915	7.57556	2.07556		-0.299146	0		7.57556			1350	3.8224e-14	1	4.11869	1.37289	3.30259	1.32104	7.42128	1349.5	4.3277	1.44256	3.24786	1.29915	7.57556	2.07556
1351	-0.5	0.5	3.37637	1.12546	3.23096	1.29238	6.60733	1350.5	3.72694	1.24231	3.28488	1.31395	7.01182	1.51182		-0.813951	0		7.01181			1351	-0.5	0.5	3.37638	1.12546	3.23095	1.29238	6.60733	1350.5	3.72695	1.24231	3.28487	1.31395	7.01182	1.51182
1352	-0.866025	0.133975	2.53321	0.844402	2.96346	1.18538	5.49667	1351.5	2.93141	0.977136	3.11158	1.24463	6.04299	0.542991		-1.11066	-5.55112e-16		6.04297			1352	-0.866025	0.133975	2.53321	0.844403	2.96346	1.18538	5.49667	1351.5	2.93142	0.977137	3.11157	1.24463	6.04299	0.542991
1353	-1	0	1.81512	0.60504	2.57178	1.02871	4.3869	1352.5	2.15425	0.718085	2.77441	1.10977	4.92867	-0.571333		-1.10977	0		4.92865			1353	-1	0	1.81513	0.605041	2.57178	1.02871	4.3869	1352.5	2.15426	0.718085	2.77441	1.10977	4.92867	-0.571333
1354	-0.866025	0.133975	1.41452	0.471508	2.16087	0.864347	3.57539	1353.5	1.60372	0.534572	2.36372	0.945487	3.96743	-1.53257		-0.811512	0		3.96743			1354	-0.866025	0.133975	1.41453	0.471509	2.16086	0.864347	3.57539	1353.5	1.60372	0.534573	2.36371	0.945487	3.96743	-1.53257
1355	-0.5	0.5	1.43875	0.479585	1.84082	0.736329	3.27958	1354.5	1.42731	0.47577	1.98954	0.795815	3.41685	-2.08315		-0.295815	4.44089e-16		3.41686			1355	-0.5	0.5	1.43876	0.479585	1.84082	0.736329	3.27958	1354.5	1.42732	0.475771	1.98953	0.795814	3.41685	-2.08315
1356	-4.90046e-14	1	1.88132	0.627106	1.6974	0.678962	3.57872	1355.5	1.67231	0.557436	1.75213	0.700854	3.42444	-2.07556		0.299146	0		3.42446			1356	-4.90046e-14	1	1.88132	0.627106	1.6974	0.678962	3.57872	1355.5	1.67231	0.557436	1.75213	0.700854	3.42444	-2.07556
1357	0.5	1.5	2.62363	0.874544	1.76904	0.707616	4.39267	1356.5	2.27306	0.757686	1.71512	0.686049	3.98818	-1.51182		0.813951	0		3.98821			1357	0.5	1.5	2.62364	0.874544	1.76904	0.707616	4.39267	1356.5	2.27306	0.757686	1.71512	0.686049	3.98818	-1.51182
1358	0.866025	1.86603	3.46679	1.1556	2.03654	0.814615	5.50333	1357.5	3.06859	1.02286	1.88842	0.755367	4.95701	-0.542991		1.11066	0		4.95705			1358	0.866025	1.86603	3.4668	1.1556	2.03653	0.814615	5.50333	1357.5	3.0686	1.02286	1.88841	0.755367	4.95701	-0.542991
1359	1	2	4.18488	1.39496	2.42822	0.971287	6.6131	1358.5	3.84575	1.28192	2.22559	0.890235	6.07133	0.571333		1.10977	0		6.07137			1359	1	2	4.18488	1.39496	2.42821	0.971287	6.6131	1358.5	3.84575	1.28191	2.22558	0.890235	6.07133	0.571333
1360	0.866025	1.86603	4.58548	1.52849	2.83913	1.13565	7.42461	1359.5	4.39628	1.46543	2.63628	1.05451	7.03257	1.53257		0.811512	0		7.0326			1360	0.866025	1.86603	4.58548	1.52849	2.83913	1.13565	7.42461	1359.5	4.39629	1.46543	2.63628	1.05451	7.03257	1.53257
1361	0.5	1.5	4.56125	1.52042	3.15918	1.26367	7.72042	1360.5	4.57269	1.52423	3.01046	1.20419	7.58315	2.08315		0.295815	0		7.58317			1361	0.5	1.5	4.56125	1.52041	3.15917	1.26367	7.72042	1360.5	4.5727	1.52423	3.01046	1.20419	7.58315	2.08315
1362	5.97853e-14	1	4.11868	1.37289	3.3026	1.32104	7.42128	1361.5	4.32769	1.44256	3.24787	1.29915	7.57556	2.07556		-0.299146	0		7.57556			1362	5.97853e-14	1	4.11869	1.37289	3.30259	1.32104	7.42128	1361.5	4.3277	1.44256	3.24786	1.29915	7.57556	2.07556
1363	-0.5	0.5	3.37637	1.12546	3.23096	1.29238	6.60733	1362.5	3.72694	1.24231	3.28488	1.31395	7.01182	1.51182		-0.813951	0		7.01181			1363	-0.5	0.5	3.37638	1.12546	3.23095	1.29238	6.60733	1362.5	3.72695	1.24231	3.28487	1.31395	7.01182	1.51182
1364	-0.866025	0.133975	2.53321	0.844402	2.96346	1.18538	5.49667	1363.5	2.93141	0.977136	3.11158	1.24463	6.04299	0.542991		-1.11066	-6.66134e-16		6.04297			1364	-0.866025	0.133975	2.53321	0.844403	2.96346	1.18538	5.49667	1363.5	2.93142	0.977137	3.11157	1.24463	6.04299	0.542991
1365	-1	0	1.81512	0.60504	2.57178	1.02871	4.3869	1364.5	2.15425	0.718085	2.77441	1.10977	4.92867	-0.571333		-1.10977	-2.22045e-16		4.92865			1365	-1	0	1.81513	0.605041	2.57178	1.02871	4.3869	1364.5	2.15426	0.718085	2.77441	1.10977	4.92867	-0.571333
1366	-0.866025	0.133975	1.41452	0.471508	2.16087	0.864347	3.57539	1365.5	1.60372	0.534572	2.36372	0.945487	3.96743	-1.53257		-0.811512	0		3.96743			1366	-0.866025	0.133975	1.41453	0.471509	2.16086	0.864347	3.57539	1365.5	1.60372	0.534573	2.36371	0.945487	3.96743	-1.53257
1367	-0.5	0.5	1.43875	0.479585	1.84082	0.736329	3.27958	1366.5	1.42731	0.47577	1.98954	0.795815	3.41685	-2.08315		-0.295815	-5.55112e-16		3.41686			1367	-0.5	0.5	1.43876	0.479585	1.84082	0.736329	3.27958	1366.5	1.42732	0.475771	1.98953	0.795814	3.41685	-2.08315
1368	-7.05659e-14	1	1.88132	0.627106	1.6974	0.678962	3.57872	1367.5	1.67231	0.557436	1.75213	0.700854	3.42444	-2.07556		0.299146	0		3.42446			1368	-7.05659e-14	1	1.88132	0.627106	1.6974	0.678962	3.57872	1367.5	1.67231	0.557436	1.75213	0.700854	3.42444	-2.07556
1369	0.5	1.5	2.62363	0.874544	1.76904	0.707616	4.39267	1368.5	2.27306	0.757686	1.71512	0.686049	3.98818	-1.51182		0.813951	0		3.98821			1369	0.5	1.5	2.62364	0.874544	1.76904	0.707616	4.39267	1368.5	2.27306	0.757686	1.71512	0.686049	3.98818	-1.51182
1370	0.866025	1.86603	3.46679	1.1556	2.03654	0.814615	5.50333	1369.5	3.06859	1.02286	1.88842	0.755367	4.95701	-0.542991		1.11066	0		4.95705			1370	0.866025	1.86603	3.4668	1.1556	2.03653	0.814615	5.50333	1369.5	3.0686	1.02286	1.88841	0.755367	4.95701	-0.542991
1371	1	2	4.18488	1.39496	2.42822	0.971287	6.6131	1370.5	3.84575	1.28192	2.22559	0.890235	6.07133	0.571333		1.10977	0		6.07137			1371	1	2	4.18488	1.39496	2.42821	0.971287	6.6131	1370.5	3.84575	1.28191	2.22558	0.890235	6.07133	0.571333
1372	0.866025	1.86603	4.58548	1.52849	2.83913	1.13565	7.42461	1371.5	4.39628	1.46543	2.63628	1.05451	7.03257	1.53257		0.811512	0		7.0326			1372	0.866025	1.86603	4.58548	1.52849	2.83913	1.13565	7.42461	1371.5	4.39629	1.46543	2.63628	1.05451	7.03257	1.53257
1373	0.5	1.5	4.56125	1.52042	3.15918	1.26367	7.72042	1372.5	4.57269	1.52423	3.01046	1.20419	7.58315	2.08315		0.295815	0		7.58317			1373	0.5	1.5	4.56125	1.52041	3.15917	1.26367	7.72042	1372.5	4.5727	1.52423	3.01046	1.20419	7.58315	2.08315
1374	8.13466e-14	1	4.11868	1.37289	3.3026	1.32104	7.42128	1373.5	4.32769	1.44256	3.24787	1.29915	7.57556	2.07556		-0.299146	0		7.57556			1374	8.13466e-14	1	4.11869	1.37289	3.30259	1.32104	7.42128	1373.5	4.3277	1.44256	3.24786	1.29915	7.57556	2.07556
1375	-0.5	0.5	3.37637	1.12546	3.23096	1.29238	6.60733	1374.5	3.72694	1.24231	3.28488	1.31395	7.01182	1.51182		-0.813951	0		7.01181			1375	-0.5	0.5	3.37638	1.12546	3.23095	1.29238	6.60733	1374.5	3.72695	1.24231	3.28487	1.31395	7.01182	1.51182
1376	-0.866025	0.133975	2.53321	0.844402	2.96346	1.18538	5.49667	1375.5	2.93141	0.977136	3.11158	1.24463	6.04299	0.542991		-1.11066	0		6.04297			1376	-0.866025	0.133975	2.53321	0.844403	2.96346	1.18538	5.49667	1375.5	2.93142	0.977137	3.11157	1.24463	6.04299	0.542991
1377	-1	0	1.81512	0.60504	2.57178	1.02871	4.3869	1376.5	2.15425	0.718085	2.77441	1.10977	4.92867	-0.571333		-1.10977	2.22045e-16		4.92865			1377	-1	0	1.81513	0.605041	2.57178	1.02871	4.3869	1376.5	2.15426	0.718085	2.77441	1.10977	4.92867	-0.571333
1378	-0.866025	0.133975	1.41452	0.471508	2.16087	0.864347	3.57539	1377.5	1.60372	0.534572	2.36372	0.945487	3.96743	-1.53257		-0.811512	-6.66134e-16		3.96743			1378	-0.866025	0.133975	1.41453	0.471509	2.16086	0.864347	3.57539	1377.5	1.60372	0.534573	2.36371	0.945487	3.96743	-1.53257
1379	-0.5	0.5	1.43875	0.479585	1.84082	0.736329	3.27958	1378.5	1.42731	0.47577	1.98954	0.795815	3.41685	-2.08315		-0.295815	4.44089e-16		3.41686			1379	-0.5	0.5	1.43876	0.479585	1.84082	0.736329	3.27958	1378.5	1.42732	0.475771	1.98953	0.795814	3.41685	-2.08315
1380	-9.21273e-14	1	1.88132	0.627106	1.6974	0.678962	3.57872	1379.5	1.67231	0.557436	1.75213	0.700854	3.42444	-2.07556		0.299146	0		3.42446			1380	-9.21273e-14	1	1.88132	0.627106	1.6974	0.678962	3.57872	1379.5	1.67231	0.557436	1.75213	0.700854	3.42444	-2.07556
1381	0.5	1.5	2.62363	0.874544	1.76904	0.707616	4.39267	1380.5	2.27306	0.757686	1.71512	0.686049	3.98818	-1.51182		0.813951	0		3.98821			1381	0.5	1.5	2.62364	0.874544	1.76904	0.707616	4.39267	1380.5	2.27306	0.757686	1.71512	0.686049	3.98818	-1.51182
1382	0.866025	1.86603	3.46679	1.1556	2.03654	0.814615	5.50333	1381.5	3.06859	1.02286	1.88842	0.755367	4.95701	-0.542991		1.11066	0		4.95705			1382	0.866025	1.86603	3.4668	1.1556	2.03653	0.814615	5.50333	1381.5	3.0686	1.02286	1.88841	0.755367	4.95701	-0.542991
1383	1	2	4.18488	1.39496	2.42822	0.971287	6.6131	1382.5	3.84575	1.28192	2.22559	0.890235	6.07133	0.571333		1.10977	0		6.07137			1383	1	2	4.18488	1.39496	2.42821	0.971287	6.6131	1382.5	3.84575	1.28191	2.22558	0.890235	6.07133	0.571333
1384	0.866025	1.86603	4.58548	1.52849	2.83913	1.13565	7.42461	1383.5	4.39628	1.46543	2.63628	1.05451	7.03257	1.53257		0.811512	0		7.0326			1384	0.866025	1.86603	4.58548	1.52849	2.83913	1.13565	7.42461	1383.5	4.39629	1.46543	2.63628	1.05451	7.03257	1.53257
1385	0.5	1.5	4.56125	1.52042	3.15918	1.26367	7.72042	1384.5	4.57269	1.52423	3.01046	1.20419	7.58315	2.08315		0.295815	0		7.58317			1385	0.5	1.5	4.56125	1.52041	3.15917	1.26367	7.72042	1384.5	4.5727	1.52423	3.01046	1.20419	7.58315	2.08315
1386	1.02908e-13	1	4.11868	1.37289	3.3026	1.32104	7.42128	1385.5	4.32769	1.44256	3.24787	1.29915	7.57556	2.07556		-0.299146	0		7.57556			1386	1.02908e-13	1	4.11869	1.37289	3.30259	1.32104	7.42128	1385.5	4.3277	1.44256	3.24786	1.29915	7.57556	2.07556
1387	-0.5	0.5	3.37637	1.12546	3.23096	1.29238	6.60733	1386.5	3.72694	1.24231	3.28488	1.31395	7.01182	1.51182		-0.813951	0		7.01181			1387	-0.5	0.5	3.37638	1.12546	3.23095	1.29238	6.60733	1386.5	3.72695	1.24231	3.28487	1.31395	7.01182	1.51182
1388	-0.866025	0.133975	2.53321	0.844402	2.96346	1.18538	5.49667	1387.5	2.93141	0.977136	3.11158	1.24463	6.04299	0.542991		-1.11066	-3.33067e-16		6.04297			1388	-0.866025	0.133975	2.53321	0.844403	2.96346	1.18538	5.49667	1387.5	2.93142	0.977137	3.11157	1.24463	6.04299	0.542991
1389	-1	0	1.81512	0.60504	2.57178	1.02871	4.3869	1388.5	2.15425	0.718085	2.77441	1.10977	4.92867	-0.571333		-1.10977	4.44089e-16		4.92865			1389	-1	0	1.81513	0.605041	2.57178	1.02871	4.3869	1388.5	2.15426	0.718085	2.77441	1.10977	4.92867	-0.571333
1390	-0.866025	0.133975	1.41452	0.471508	2.16087	0.864347	3.57539	1389.5	1.60372	0.534572	2.36372	0.945487	3.96743	-1.53257		-0.811512	3.33067e-16		3.96743			1390	-0.866025	0.133975	1.41453	0.471509	2.16086	0.864347	3.57539	1389.5	1.60372	0.534573	2.36371	0.945487	3.96743	-1.53257
1391	-0.5	0.5	1.43875	0.479585	1.84082	0.736329	3.27958	1390.5	1.42731	0.47577	1.98954	0.795815	3.41685	-2.08315		-0.295815	0		3.41686			1391	-0.5	0.5	1.43876	0.479585	1.84082	0.736329	3.27958	1390.5	1.42732	0.475771	1.98953	0.795814	3.41685	-2.08315
1392	-1.13689e-13	1	1.88132	0.627106	1.6974	0.678962	3.57872	1391.5	1.67231	0.557436	1.75213	0.700854	3.42444	-2.07556		0.299146	0		3.42446			1392	-1.13689e-13	1	1.88132	0.627106	1.6974	0.678962	3.57872	1391.5	1.67231	0.557436	1.75213	0.700854	3.42444	-2.07556
1393	0.5	1.5	2.62363	0.874544	1.76904	0.707616	4.39267	1392.5	2.27306	0.757686	1.71512	0.686049	3.98818	-1.51182		0.813951	0		3.98821			1393	0.5	1.5	2.62364	0.874544	1.76904	0.707616	4.39267	1392.5	2.27306	0.757686	1.71512	0.686049	3.98818	-1.51182
1394	0.866025	1.86603	3.46679	1.1556	2.03654	0.814615	5.50333	1393.5	3.06859	1.02286	1.88842	0.755367	4.95701	-0.542991		1.11066	0		4.95705			1394	0.866025	1.86603	3.4668	1.1556	2.03653	0.814615	5.50333	1393.5	3.0686	1.02286	1.88841	0.755367	4.95701	-0.542991
1395	1	2	4.18488	1.39496	2.42822	0.971287	6.6131	1394.5	3.84575	1.28192	2.22559	0.890235	6.07133	0.571333		1.10977	0		6.07137			1395	1	2	4.18488	1.39496	2.42821	0.971287	6.6131	1394.5	3.84575	1.28191	2.22558	0.890235	6.07133	0.571333
1396	0.866025	1.86603	4.58548	1.52849	2.83913	1.13565	7.42461	1395.5	4.39628	1.46543	2.63628	1.05451	7.03257	1.53257		0.811512	0		7.0326			1396	0.866025	1.86603	4.58548	1.52849	2.83913	1.13565	7.42461	1395.5	4.39629	1.46543	2.63628	1.05451	7.03257	1.53257
1397	0.5	1.5	4.56125	1.52042	3.15918	1.26367	7.72042	1396.5	4.57269	1.52423	3.01046	1.20419	7.58315	2.08315		0.295815	0		7.58317			1397	0.5	1.5	4.56125	1.52041	3.15917	1.26367	7.72042	1396.5	4.5727	1.52423	3.01046	1.20419	7.58315	2.08315
1398	1.24469e-13	1	4.11868	1.37289	3.3026	1.32104	7.42128	1397.5	4.32769	1.44256	3.24787	1.29915	7.57556	2.07556		-0.299146	0		7.57556			1398	1.24469e-13	1	4.11869	1.37289	3.30259	1.32104	7.42128	1397.5	4.3277	1.44256	3.24786	1.29915	7.57556	2.07556
1399	-0.5	0.5	3.37637	1.12546	3.23096	1.29238	6.60733	1398.5	3.72694	1.24231	3.28488	1.31395	7.01182	1.51182		-0.813951	0		7.01181			1399	-0.5	0.5	3.37638	1.12546	3.23095	1.29238	6.60733	1398.5	3.72695	1.24231	3.28487	1.31395	7.01182	1.51182
1400	-0.866025	0.133975	2.53321	0.844402	2.96346	1.18538	5.49667	1399.5	2.93141	0.977136	3.11158	1.24463	6.04299	0.542991		-1.11066	-2.22045e-16		6.04297			1400	-0.866025	0.133975	2.53321	0.844403	2.96346	1.18538	5.49667	1399.5	2.93142	0.977137	3.11157	1.24463	6.04299	0.542991
1401	-1	0	1.81512	0.60504	2.57178	1.02871	4.3869	1400.5	2.15425	0.718085	2.77441	1.10977	4.92867	-0.571333		-1.10977	-4.44089e-16		4.92865			1401	-1	0	1.81513	0.605041	2.57178	1.02871	4.3869	1400.5	2.15426	0.718085	2.77441	1.10977	4.92867	-0.571333
1402	-0.866025	0.133975	1.41452	0.471508	2.16087	0.864347	3.57539	1401.5	1.60372	0.534572	2.36372	0.945487	3.96743	-1.53257		-0.811512	3.33067e-16		3.96743			1402	-0.866025	0.133975	1.41453	0.471509	2.16086	0.864347	3.57539	1401.5	1.60372	0.534573	2.36371	0.945487	3.96743	-1.53257
1403	-0.5	0.5	1.43875	0.479585	1.84082	0.736329	3.27958	1402.5	1.42731	0.47577	1.98954	0.795815	3.41685	-2.08315		-0.295815	0		3.41686			1403	-0.5	0.5	1.43876	0.479585	1.84082	0.736329	3.27958	1402.5	1.42732	0.475771	1.98953	0.795814	3.41685	-2.08315
1404	-1.3525e-13	1	1.88132	0.627106	1.6974	0.678962	3.57872	1403.5	1.67231	0.557436	1.75213	0.700854	3.42444	-2.07556		0.299146	0		3.42446			1404	-1.3525e-13	1	1.88132	0.627106	1.6974	0.678962	3.57872	1403.5	1.67231	0.557436	1.75213	0.700854	3.42444	-2.07556
1405	0.5	1.5	2.62363	0.874544	1.76904	0.707616	4.39267	1404.5	2.27306	0.757686	1.71512	0.686049	3.98818	-1.51182		0.813951	0		3.98821			1405	0.5	1.5	2.62364	0.874544	1.76904	0.707616	4.39267	1404.5	2.27306	0.757686	1.71512	0.686049	3.98818	-1.51182
1406	0.866025	1.86603	3.46679	1.1556	2.03654	0.814615	5.50333	1405.5	3.06859	1.02286	1.88842	0.755367	4.95701	-0.542991		1.11066	0		4.95705			1406	0.866025	1.86603	3.4668	1.1556	2.03653	0.814615	5.50333	1405.5	3.0686	1.02286	1.88841	0.755367	4.95701	-0.542991
1407	1	2	4.18488	1.39496	2.42822	0.971287	6.6131	1406.5	3.84575	1.28192	2.22559	0.890235	6.07133	0.571333		1.10977	0		6.07137			1407	1	2	4.18488	1.39496	2.42821	0.971287	6.6131	1406.5	3.84575	1.28191	2.22558	0.890235	6.07133	0.571333
1408	0.866025	1.86603	4.58548	1.52849	2.83913	1.13565	7.42461	1407.5	4.39628	1.46543	2.63628	1.05451	7.03257	1.53257		0.811512	0		7.0326			1408	0.866025	1.86603	4.58548	1.52849	2.83913	1.13565	7.42461	1407.5	4.39629	1.46543	2.63628	1.05451	7.03257	1.53257
1409	0.5	1.5	4.56125	1.52042	3.15918	1.26367	7.72042	1408.5	4.57269	1.52423	3.01046	1.20419	7.58315	2.08315		0.295815	0		7.58317			1409	0.5	1.5	4.56125	1.52041	3.15917	1.26367	7.72042	1408.5	4.5727	1.52423	3.01046	1.20419	7.58315	2.08315
1410	3.23437e-14	1	4.11868	1.37289	3.3026	1.32104	7.42128	1409.5	4.32769	1.44256	3.24787	1.29915	7.57556	2.07556		-0.299146	0		7.57556			1410	3.23437e-14	1	4.11869	1.37289	3.30259	1.32104	7.42128	1409.5	4.3277	1.44256	3.24786	1.29915	7.57556	2.07556
1411	-0.5	0.5	3.37637	1.12546	3.23096	1.29238	6.60733	1410.5	3.72694	1.24231	3.28488	1.31395	7.01182	1.51182		-0.813951	0		7.01181			1411	-0.5	0.5	3.37638	1.12546	3.23095	1.29238	6.60733	1410.5	3.72695	1.24231	3.28487	1.31395	7.01182	1.51182
1412	-0.866025	0.133975	2.53321	0.844402	2.96346	1.18538	5.49667	1411.5	2.93141	0.977136	3.11158	1.24463	6.04299	0.542991		-1.11066	-3.33067e-16		6.04297			1412	-0.866025	0.133975	2.53321	0.844403	2.96346	1.18538	5.49667	1411.5	2.93142	0.977137	3.11157	1.24463	6.04299	0.542991
1413	-1	0	1.81512	0.60504	2.57178	1.02871	4.3869	1412.5	2.15425	0.718085	2.77441	1.10977	4.92867	-0.571333		-1.10977	2.22045e-16		4.92865			1413	-1	0	1.81513	0.605041	2.57178	1.02871	4.3869	1412.5	2.15426	0.718085	2.77441	1.10977	4.92867	-0.571333
1414	-0.866025	0.133975	1.41452	0.471508	2.16087	0.864347	3.57539	1413.5	1.60372	0.534572	2.36372	0.945487	3.96743	-1.53257		-0.811512	0		3.96743			1414	-0.866025	0.133975	1.41453	0.471509	2.16086	0.864347	3.57539	1413.5	1.60372	0.534573	2.36371	0.945487	3.96743	-1.53257
1415	-0.5	0.5	1.43875	0.479585	1.84082	0.736329	3.27958	1414.5	1.42731	0.47577	1.98954	0.795815	3.41685	-2.08315		-0.295815	0		3.41686			1415	-0.5	0.5	1.43876	0.479585	1.84082	0.736329	3.27958	1414.5	1.42732	0.475771	1.98953	0.795814	3.41685	-2.08315
1416	-4.31244e-14	1	1.88132	0.627106	1.6974	0.678962	3.57872	1415.5	1.67231	0.557436	1.75213	0.700854	3.42444	-2.07556		0.299146	0		3.42446			1416	-4.31244e-14	1	1.88132	0.627106	1.6974	0.678962	3.57872	1415.5	1.67231	0.557436	1.75213	0.700854	3.42444	-2.07556
1417	0.5	1.5	2.62363	0.874544	1.76904	0.707616	4.39267	1416.5	2.27306	0.757686	1.71512	0.686049	3.98818	-1.51182		0.813951	0		3.98821			1417	0.5	1.5	2.62364	0.874544	1.76904	0.707616	4.39267	1416.5	2.27306	0.757686	1.71512	0.686049	3.98818	-1.51182
1418	0.866025	1.86603	3.46679	1.1556	2.03654	0.814615	5.50333	1417.5	3.06859	1.02286	1.88842	0.755367	4.95701	-0.542991		1.11066	0		4.95705			1418	0.866025	1.86603	3.4668	1.1556	2.03653	0.814615	5.50333	1417.5	3.0686	1.02286	1.88841	0.755367	4.95701	-0.542991
1419	1	2	4.18488	1.39496	2.42822	0.971287	6.6131	1418.5	3.84575	1.28192	2.22559	0.890235	6.07133	0.571333		1.10977	0		6.07137			1419	1	2	4.18488	1.39496	2.42821	0.971287	6.6131	1418.5	3.84575	1.28191	2.22558	0.890235	6.07133	0.571333
1420	0.866025	1.86603	4.58548	1.52849	2.83913	1.13565	7.42461	1419.5	4.39628	1.46543	2.63628	1.05451	7.03257	1.53257		0.811512	0		7.0326			1420	0.866025	1.86603	4.58548	1.52849	2.83913	1.13565	7.42461	1419.5	4.39629	1.46543	2.63628	1.05451	7.03257	1.53257
1421	0.5	1.5	4.56125	1.52042	3.15918	1.26367	7.72042	1420.5	4.57269	1.52423	3.01046	1.20419	7.58315	2.08315		0.295815	0		7.58317			1421	0.5	1.5	4.56125	1.52041	3.15917	1.26367	7.72042	1420.5	4.5727	1.52423	3.01046	1.20419	7.58315	2.08315
1422	5.3905e-14	1	4.11868	1.37289	3.3026	1.32104	7.42128	1421.5	4.32769	1.44256	3.24787	1.29915	7.57556	2.07556		-0.299146	0		7.57556			1422	5.3905e-14	1	4.11869	1.37289	3.30259	1.32104	7.42128	1421.5	4.3277	1.44256	3.24786	1.29915	7.57556	2.07556
1423	-0.5	0.5	3.37637	1.12546	3.23096	1.29238	6.60733	1422.5	3.72694	1.24231	3.28488	1.31395	7.01182	1.51182		-0.813951	0		7.01181			1423	-0.5	0.5	3.37638	1.12546	3.23095	1.29238	6.60733	1422.5	3.72695	1.24231	3.28487	1.31395	7.01182	1.51182
1424	-0.866025	0.133975	2.53321	0.844402	2.96346	1.18538	5.49667	1423.5	2.93141	0.977136	3.11158	1.24463	6.04299	0.542991		-1.11066	6.66134e-16		6.04297			1424	-0.866025	0.133975	2.53321	0.844403	2.96346	1.18538	5.49667	1423.5	2.93142	0.977137	3.11157	1.24463	6.04299	0.542991
1425	-1	0	1.81512	0.60504	2.57178	1.02871	4.3869	1424.5	2.15425	0.718085	2.77441	1.10977	4.92867	-0.571333		-1.10977	-4.44089e-16		4.92865			1425	-1	0	1.81513	0.605041	2.57178	1.02871	4.3869	1424.5	2.15426	0.718085	2.77441	1.10977	4.92867	-0.571333
1426	-0.866025	0.133975	1.41452	0.471508	2.16087	0.864347	3.57539	1425.5	1.60372	0.534572	2.36372	0.945487	3.96743	-1.53257		-0.811512	0		3.96743			1426	-0.866025	0.133975	1.41453	0.471509	2.16086	0.864347	3.57539	1425.5	1.60372	0.534573	2.36371	0.945487	3.96743	-1.53257
1427	-0.5	0.5	1.43875	0.479585	1.84082	0.736329	3.27958	1426.5	1.42731	0.47577	1.98954	0.795815	3.41685	-2.08315		-0.295815	0		3.41686			1427	-0.5	0.5	1.43876	0.479585	1.84082	0.736329	3.27958	1426.5	1.42732	0.475771	1.98953	0.795814	3.41685	-2.08315
1428	-6.46857e-14	1	1.88132	0.627106	1.6974	0.678962	3.57872	1427.5	1.67231	0.557436	1.75213	0.700854	3.42444	-2.07556		0.299146	0		3.42446			1428	-6.46857e-14	1	1.88132	0.627106	1.6974	0.678962	3.57872	1427.5	1.67231	0.557436	1.75213	0.700854	3.42444	-2.07556
1429	0.5	1.5	2.62363	0.874544	1.76904	0.707616	4.39267	1428.5	2.27306	0.757686	1.71512	0.686049	3.98818	-1.51182		0.813951	0		3.98821			1429	0.5	1.5	2.62364	0.874544	1.76904	0.707616	4.39267	1428.5	2.27306	0.757686	1.71512	0.686049	3.98818	-1.51182
1430	0.866025	1.86603	3.46679	1.1556	2.03654	0.814615	5.50333	1429.5	3.06859	1.02286	1.88842	0.755367	4.95701	-0.542991		1.11066	0		4.95705			1430	0.866025	1.86603	3.4668	1.1556	2.03653	0.814615	5.50333	1429.5	3.0686	1.02286	1.88841	0.755367	4.95701	-0.542991
1431	1	2	4.18488	1.39496	2.42822	0.971287	6.6131	1430.5	3.84575	1.28192	2.22559	0.890235	6.07133	0.571333		1.10977	0		6.07137			1431	1	2	4.18488	1.39496	2.42821	0.971287	6.6131	1430.5	3.84575	1.28191	2.22558	0.890235	6.07133	0.571333
1432	0.866025	1.86603	4.58548	1.52849	2.83913	1.13565	7.42461	1431.5	4.39628	1.46543	2.63628	1.05451	7.03257	1.53257		0.811512	0		7.0326			1432	0.866025	1.86603	4.58548	1.52849	2.83913	1.13565	7.42461	1431.5	4.39629	1.46543	2.63628	1.05451	7.03257	1.53257
1433	0.5	1.5	4.56125	1.52042	3.15918	1.26367	7.72042	1432.5	4.57269	1.52423	3.01046	1.20419	7.58315	2.08315		0.295815	0		7.58317			1433	0.5	1.5	4.56125	1.52041	3.15917	1.26367	7.72042	1432.5	4.5727	1.52423	3.01046	1.20419	7.58315	2.08315
1434	7.54663e-14	1	4.11868	1.37289	3.3026	1.32104	7.42128	1433.5	4.32769	1.44256	3.24787	1.29915	7.57556	2.07556		-0.299146	0		7.57556			1434	7.54663e-14	1	4.11869	1.37289	3.30259	1.32104	7.42128	1433.5	4.3277	1.44256	3.24786	1.29915	7.57556	2.07556
1435	-0.5	0.5	3.37637	1.12546	3.23096	1.29238	6.60733	1434.5	3.72694	1.24231	3.28488	1.31395	7.01182	1.51182		-0.813951	0		7.01181			1435	-0.5	0.5	3.37638	1.12546	3.23095	1.29238	6.60733	1434.5	3.72695	1.24231	3.28487	1.31395	7.01182	1.51182
1436	-0.866025	0.133975	2.53321	0.844402	2.96346	1.18538	5.49667	1435.5	2.93141	0.977136	3.11158	1.24463	6.04299	0.542991		-1.11066	7.77156e-16		6.04297			1436	-0.866025	0.133975	2.53321	0.844403	2.96346	1.18538	5.49667	1435.5	2.93142	0.977137	3.11157	1.24463	6.04299	0.542991
1437	-1	0	1.81512	0.60504	2.57178	1.02871	4.3869	1436.5	2.15425	0.718085	2.77441	1.10977	4.92867	-0.571333		-1.10977	-4.44089e-16		4.92865			1437	-1	0	1.81513	0.605041	2.57178	1.02871	4.3869	1436.5	2.15426	0.718085	2.77441	1.10977	4.92867	-0.571333
1438	-0.866025	0.133975	1.41452	0.471508	2.16087	0.864347	3.57539	1437.5	1.60372	0.534572	2.36372	0.945487	3.96743	-1.53257		-0.811512	4.44089e-16		3.96743			1438	-0.866025	0.133975	1.41453	0.471509	2.16086	0.864347	3.57539	1437.5	1.60372	0.534573	2.36371	0.945487	3.96743	-1.53257
1439	-0.5	0.5	1.43875	0.479585	1.84082	0.736329	3.27958	1438.5	1.42731	0.47577	1.98954	0.795815	3.41685	-2.08315		-0.295815	-5.55112e-16		3.41686			1439	-0.5	0.5	1.43876	0.479585	1.84082	0.736329	3.27958	1438.5	1.42732	0.475771	1.98953	0.795814	3.41685	-2.08315
1440	-8.6247e-14	1	1.88132	0.627106	1.6974	0.678962	3.57872	1439.5	1.67231	0.557436	1.75213	0.700854	3.42444	-2.07556		0.299146	0		3.42446			1440	-8.6247e-14	1	1.88132	0.627106	1.6974	0.678962	3.57872	1439.5	1.67231	0.557436	1.75213	0.700854	3.42444	-2.07556
1441	0.5	1.5	2.62363	0.874544	1.76904	0.707616	4.39267	1440.5	2.27306	0.757686	1.71512	0.686049	3.98818	-1.51182		0.813951	0		3.98821			1441	0.5	1.5	2.62364	0.874544	1.76904	0.707616	4.39267	1440.5	2.27306	0.757686	1.71512	0.686049	3.98818	-1.51182
1442	0.866025	1.86603	3.46679	1.1556	2.03654	0.814615	5.50333	1441.5	3.06859	1.02286	1.88842	0.755367	4.95701	-0.542991		1.11066	0		4.95705			1442	0.866025	1.86603	3.4668	1.1556	2.03653	0.814615	5.50333	1441.5	3.0686	1.02286	1.88841	0.755367	4.95701	-0.542991
1443	1	2	4.18488	1.39496	2.42822	0.971287	6.6131	1442.5	3.84575	1.28192	2.22559	0.890235	6.07133	0.571333		1.10977	0		6.07137			1443	1	2	4.18488	1.39496	2.42821	0.971287	6.6131	1442.5	3.84575	1.28191	2.22558	0.890235	6.07133	0.571333
1444	0.866025	1.86603	4.58548	1.52849	2.83913	1.13565	7.42461	1443.5	4.39628	1.46543	2.63628	1.05451	7.03257	1.53257		0.811512	0		7.0326			1444	0.866025	1.86603	4.58548	1.52849	2.83913	1.13565	7.42461	1443.5	4.39629	1.46543	2.63628	1.05451	7.03257	1.53257
1445	0.5	1.5	4.56125	1.52042	3.15918	1.26367	7.72042	1444.5	4.57269	1.52423	3.01046	1.20419	7.58315	2.08315		0.295815	0		7.58317			1445	0.5	1.5	4.56125	1.52041	3.15917	1.26367	7.72042	1444.5	4.5727	1.52423	3.01046	1.20419	7.58315	2.08315
1446	9.70276e-14	1	4.11868	1.37289	3.3026	1.32104	7.42128	1445.5	4.32769	1.44256	3.24787	1.29915	7.57556	2.07556		-0.299146	0		7.57556			1446	9.70276e-14	1	4.11869	1.37289	3.30259	1.32104	7.42128	1445.5	4.3277	1.44256	3.24786	1.29915	7.57556	2.07556
1447	-0.5	0.5	3.37637	1.12546	3.23096	1.29238	6.60733	1446.5	3.72694	1.24231	3.28488	1.31395	7.01182	1.51182		-0.813951	0		7.01181			1447	-0.5	0.5	3.37638	1.12546	3.23095	1.29238	6.60733	1446.5	3.72695	1.24231	3.28487	1.31395	7.01182	1.51182
1448	-0.866025	0.133975	2.53321	0.844402	2.96346	1.18538	5.49667	1447.5	2.93141	0.977136	3.11158	1.24463	6.04299	0.542991		-1.11066	0		6.04297			1448	-0.866025	0.133975	2.53321	0.844403	2.96346	1.18538	5.49667	1447.5	2.93142	0.977137	3.11157	1.24463	6.04299	0.542991
1449	-1	0	1.81512	0.60504	2.57178	1.02871	4.3869	1448.5	2.15425	0.718085	2.77441	1.10977	4.92867	-0.571333		-1.10977	6.66134e-16		4.92865			1449	-1	0	1.81513	0.605041	2.57178	1.02871	4.3869	1448.5	2.15426	0.718085	2.77441	1.10977	4.92867	-0.571333
1450	-0.866025	0.133975	1.41452	0.471508	2.16087	0.864347	3.57539	1449.5	1.60372	0.534572	2.36372	0.945487	3.96743	-1.53257		-0.811512	0		3.96743			1450	-0.866025	0.133975	1.41453	0.471509	2.16086	0.864347	3.57539	1449.5	1.60372	0.534573	2.36371	0.945487	3.96743	-1.53257
1451	-0.5	0.5	1.43875	0.479585	1.84082	0.736329	3.27958	1450.5	1.42731	0.47577	1.98954	0.795815	3.41685	-2.08315		-0.295815	0		3.41686			1451	-0.5	0.5	1.43876	0.479585	1.84082	0.736329	3.27958	1450.5	1.42732	0.475771	1.98953	0.795814	3.41685	-2.08315
1452	-1.07808e-13	1	1.88132	0.627106	1.6974	0.678962	3.57872	1451.5	1.67231	0.557436	1.75213	0.700854	3.42444	-2.07556		0.299146	0		3.42446			1452	-1.07808e-13	1	1.88132	0.627106	1.6974	0.678962	3.57872	1451.5	1.67231	0.557436	1.75213	0.700854	3.42444	-2.07556
1453	0.5	1.5	2.62363	0.874544	1.76904	0.707616	4.39267	1452.5	2.27306	0.757686	1.71512	0.686049	3.98818	-1.51182		0.813951	0		3.98821			1453	0.5	1.5	2.62364	0.874544	1.76904	0.707616	4.39267	1452.5	2.27306	0.757686	1.71512	0.686049	3.98818	-1.51182
1454	0.866025	1.86603	3.46679	1.1556	2.03654	0.814615	5.50333	1453.5	3.06859	1.02286	1.88842	0.755367	4.95701	-0.542991		1.11066	0		4.95705			1454	0.866025	1.86603	3.4668	1.1556	2.03653	0.814615	5.50333	1453.5	3.0686	1.02286	1.88841	0.755367	4.95701	-0.542991
1455	1	2	4.18488	1.39496	2.42822	0.971287	6.6131	1454.5	3.84575	1.28192	2.22559	0.890235	6.07133	0.571333		1.10977	0		6.07137			1455	1	2	4.18488	1.39496	2.42821	0.971287	6.6131	1454.5	3.84575	1.28191	2.22558	0.890235	6.07133	0.571333
1456	0.866025	1.86603	4.58548	1.52849	2.83913	1.13565	7.42461	1455.5	4.39628	1.46543	2.63628	1.05451	7.03257	1.53257		0.811512	0		7.0326			1456	0.866025	1.86603	4.58548	1.52849	2.83913	1.13565	7.42461	1455.5	4.39629	1.46543	2.63628	1.05451	7.03257	1.53257
1457	0.5	1.5	4.56125	1.52042	3.15918	1.26367	7.72042	1456.5	4.57269	1.52423	3.01046	1.20419	7.58315	2.08315		0.295815	0		7.58317			1457	0.5	1.5	4.56125	1.52041	3.15917	1.26367	7.72042	1456.5	4.5727	1.52423	3.01046	1.20419	7.58315	2.08315
1458	1.18589e-13	1	4.11868	1.37289	3.3026	1.32104	7.42128	1457.5	4.32769	1.44256	3.24787	1.29915	7.57556	2.07556		-0.299146	0		7.57556			1458	1.18589e-13	1	4.11869	1.37289	3.30259	1.32104	7.42128	1457.5	4.3277	1.44256	3.24786	1.29915	7.57556	2.07556
1459	-0.5	0.5	3.37637	1.12546	3.23096	1.29238	6.60733	1458.5	3.72694	1.24231	3.28488	1.31395	7.01182	1.51182		-0.813951	0		7.01181			1459	-0.5	0.5	3.37638	1.12546	3.23095	1.29238	6.60733	1458.5	3.72695	1.24231	3.28487	1.31395	7.01182	1.51182
1460	-0.866025	0.133975	2.53321	0.844402	2.96346	1.18538	5.49667	1459.5	2.93141	0.977136	3.11158	1.24463	6.04299	0.542991		-1.11066	0		6.04297			1460	-0.866025	0.133975	2.53321	0.844403	2.96346	1.18538	5.49667	1459.5	2.93142	0.977137	3.11157	1.24463	6.04299	0.542991
1461	-1	0	1.81512	0.60504	2.57178	1.02871	4.3869	1460.5	2.15425	0.718085	2.77441	1.10977	4.92867	-0.571333		-1.10977	0		4.92865			1461	-1	0	1.81513	0.605041	2.57178	1.02871	4.3869	1460.5	2.15426	0.718085	2.77441	1.10977	4.92867	-0.571333
1462	-0.866025	0.133975	1.41452	0.471508	2.16087	0.864347	3.57539	1461.5	1.60372	0.534572	2.36372	0.945487	3.96743	-1.53257		-0.811512	2.22045e-16		3.96743			1462	-0.866025	0.133975	1.41453	0.471509	2.16086	0.864347	3.57539	1461.5	1.60372	0.534573	2.36371	0.945487	3.96743	-1.53257
1463	-0.5	0.5	1.43875	0.479585	1.84082	0.736329	3.27958	1462.5	1.42731	0.47577	1.98954	0.795815	3.41685	-2.08315		-0.295815	0		3.41686			1463	-0.5	0.5	1.43876	0.479585	1.84082	0.736329	3.27958	1462.5	1.42732	0.475771	1.98953	0.795814	3.41685	-2.08315
1464	-1.2937e-13	1	1.88132	0.627106	1.6974	0.678962	3.57872	1463.5	1.67231	0.557436	1.75213	0.700854	3.42444	-2.07556		0.299146	0		3.42446			1464	-1.2937e-13	1	1.88132	0.627106	1.6974	0.678962	3.57872	1463.5	1.67231	0.557436	1.75213	0.700854	3.42444	-2.07556
1465	0.5	1.5	2.62363	0.874544	1.76904	0.707616	4.39267	1464.5	2.27306	0.757686	1.71512	0.686049	3.98818	-1.51182		0.813951	0		3.98821			1465	0.5	1.5	2.62364	0.874544	1.76904	0.707616	4.39267	1464.5	2.27306	0.757686	1.71512	0.686049	3.98818	-1.51182
1466	0.866025	1.86603	3.46679	1.1556	2.03654	0.814615	5.50333	1465.5	3.06859	1.02286	1.88842	0.755367	4.95701	-0.542991		1.11066	0		4.95705			1466	0.866025	1.86603	3.4668	1.1556	2.03653	0.814615	5.50333	1465.5	3.0686	1.02286	1.88841	0.755367	4.95701	-0.542991
1467	1	2	4.18488	1.39496	2.42822	0.971287	6.6131	1466.5	3.84575	1.28192	2.22559	0.890235	6.07133	0.571333		1.10977	0		6.07137			1467	1	2	4.18488	1.39496	2.42821	0.971287	6.6131	1466.5	3.84575	1.28191	2.22558	0.890235	6.07133	0.571333
1468	0.866025	1.86603	4.58548	1.52849	2.83913	1.13565	7.42461	1467.5	4.39628	1.46543	2.63628	1.05451	7.03257	1.53257		0.811512	0		7.0326			1468	0.866025	1.86603	4.58548	1.52849	2.83913	1.13565	7.42461	1467.5	4.39629	1.46543	2.63628	1.05451	7.03257	1.53257
1469	0.5	1.5	4.56125	1.52042	3.15918	1.26367	7.72042	1468.5	4.57269	1.52423	3.01046	1.20419	7.58315	2.08315		0.295815	0		7.58317			1469	0.5	1.5	4.56125	1.52041	3.15917	1.26367	7.72042	1468.5	4.5727	1.52423	3.01046	1.20419	7.58315	2.08315
1470	1.4015e-13	1	4.11868	1.37289	3.3026	1.32104	7.42128	1469.5	4.32769	1.44256	3.24787	1.29915	7.57556	2.07556		-0.299146	0		7.57556			1470	1.4015e-13	1	4.11869	1.37289	3.30259	1.32104	7.42128	1469.5	4.3277	1.44256	3.24786	1.29915	7.57556	2.07556
1471	-0.5	0.5	3.37637	1.12546	3.23096	1.29238	6.60733	1470.5	3.72694	1.24231	3.28488	1.31395	7.01182	1.51182		-0.813951	-8.88178e-16		7.01181			1471	-0.5	0.5	3.37638	1.12546	3.23095	1.29238	6.60733	1470.5	3.72695	1.24231	3.28487	1.31395	7.01182	1.51182
1472	-0.866025	0.133975	2.53321	0.844402	2.96346	1.18538	5.49667	1471.5	2.93141	0.977136	3.11158	1.24463	6.04299	0.542991		-1.11066	-2.22045e-16		6.04297			1472	-0.866025	0.133975	2.53321	0.844403	2.96346	1.18538	5.49667	1471.5	2.93142	0.977137	3.11157	1.24463	6.04299	0.542991
1473	-1	0	1.81512	0.60504	2.57178	1.02871	4.3869	1472.5	2.15425	0.718085	2.77441	1.10977	4.92867	-0.571333		-1.10977	4.44089e-16		4.92865			1473	-1	0	1.81513	0.605041	2.57178	1.02871	4.3869	1472.5	2.15426	0.718085	2.77441	1.10977	4.92867	-0.571333
1474	-0.866025	0.133975	1.41452	0.471508	2.16087	0.864347	3.57539	1473.5	1.60372	0.534572	2.36372	0.945487	3.96743	-1.53257		-0.811512	-3.33067e-16		3.96743			1474	-0.866025	0.133975	1.41453	0.471509	2.16086	0.864347	3.57539	1473.5	1.60372	0.534573	2.36371	0.945487	3.96743	-1.53257
1475	-0.5	0.5	1.43875	0.479585	1.84082	0.736329	3.27958	1474.5	1.42731	0.47577	1.98954	0.795815	3.41685	-2.08315		-0.295815	5.55112e-16		3.41686			1475	-0.5	0.5	1.43876	0.479585	1.84082	0.736329	3.27958	1474.5	1.42732	0.475771	1.98953	0.795814	3.41685	-2.08315
1476	-3.72441e-14	1	1.88132	0.627106	1.6974	0.678962	3.57872	1475.5	1.67231	0.557436	1.75213	0.700854	3.42444	-2.07556		0.299146	0		3.42446			1476	-3.72441e-14	1	1.88132	0.627106	1.6974	0.678962	3.57872	1475.5	1.67231	0.557436	1.75213	0.700854	3.42444	-2.07556
1477	0.5	1.5	2.62363	0.874544	1.76904	0.707616	4.39267	1476.5	2.27306	0.757686	1.71512	0.686049	3.98818	-1.51182		0.813951	0		3.98821			1477	0.5	1.5	2.62364	0.874544	1.76904	0.707616	4.39267	1476.5	2.27306	0.757686	1.71512	0.686049	3.98818	-1.51182
1478	0.866025	1.86603	3.46679	1.1556	2.03654	0.814615	5.50333	1477.5	3.06859	1.02286	1.88842	0.755367	4.95701	-0.542991		1.11066	0		4.95705			1478	0.866025	1.86603	3.4668	1.1556	2.03653	0.814615	5.50333	1477.5	3.0686	1.02286	1.88841	0.755367	4.95701	-0.542991
1479	1	2	4.18488	1.39496	2.42822	0.971287	6.6131	1478.5	3.84575	1.28192	2.22559	0.890235	6.07133	0.571333		1.10977	0		6.07137			1479	1	2	4.18488	1.39496	2.42821	0.971287	6.6131	1478.5	3.84575	1.28191	2.22558	0.890235	6.07133	0.571333
1480	0.866025	1.86603	4.58548	1.52849	2.83913	1.13565	7.42461	1479.5	4.39628	1.46543	2.63628	1.05451	7.03257	1.53257		0.811512	0		7.0326			1480	0.866025	1.86603	4.58548	1.52849	2.83913	1.13565	7.42461	1479.5	4.39629	1.46543	2.63628	1.05451	7.03257	1.53257
1481	0.5	1.5	4.56125	1.52042	3.15918	1.26367	7.72042	1480.5	4.57269	1.52423	3.01046	1.20419	7.58315	2.08315		0.295815	0		7.58317			1481	0.5	1.5	4.56125	1.52041	3.15917	1.26367	7.72042	1480.5	4.5727	1.52423	3.01046	1.20419	7.58315	2.08315
1482	4.80247e-14	1	4.11868	1.37289	3.3026	1.32104	7.42128	1481.5	4.32769	1.44256	3.24787	1.29915	7.57556	2.07556		-0.299146	0		7.57556			1482	4.80247e-14	1	4.11869	1.37289	3.30259	1.32104	7.42128	1481.5	4.3277	1.44256	3.24786	1.29915	7.57556	2.07556
1483	-0.5	0.5	3.37637	1.12546	3.23096	1.29238	6.60733	1482.5	3.72694	1.24231	3.28488	1.31395	7.01182	1.51182		-0.813951	0		7.01181			1483	-0.5	0.5	3.37638	1.12546	3.23095	1.29238	6.60733	1482.5	3.72695	1.24231	3.28487	1.31395	7.01182	1.51182
1484	-0.866025	0.133975	2.53321	0.844402	2.96346	1.18538	5.49667	1483.5	2.93141	0.977136	3.11158	1.24463	6.04299	0.542991		-1.11066	-7.77156e-16		6.04297			1484	-0.866025	0.133975	2.53321	0.844403	2.96346	1.18538	5.49667	1483.5	2.93142	0.977137	3.11157	1.24463	6.04299	0.542991
1485	-1	0	1.81512	0.60504	2.57178	1.02871	4.3869	1484.5	2.15425	0.718085	2.77441	1.10977	4.92867	-0.571333		-1.10977	4.44089e-16		4.92865			1485	-1	0	1.81513	0.605041	2.57178	1.02871	4.3869	1484.5	2.15426	0.718085	2.77441	1.10977	4.92867	-0.571333
1486	-0.866025	0.133975	1.41452	0.471508	2.16087	0.864347	3.57539	1485.5	1.60372	0.534572	2.36372	0.945487	3.96743	-1.53257		-0.811512	0		3.96743			1486	-0.866025	0.133975	1.41453	0.471509	2.16086	0.864347	3.57539	1485.5	1.60372	0.534573	2.36371	0.945487	3.96743	-1.53257
1487	-0.5	0.5	1.43875	0.479585	1.84082	0.736329	3.27958	1486.5	1.42731	0.47577	1.98954	0.795815	3.41685	-2.08315		-0.295815	0		3.41686			1487	-0.5	0.5	1.43876	0.479585	1.84082	0.736329	3.27958	1486.5	1.42732	0.475771	1.98953	0.795814	3.41685	-2.08315
1488	-5.88054e-14	1	1.88132	0.627106	1.6974	0.678962	3.57872	1487.5	1.67231	0.557436	1.75213	0.700854	3.42444	-2.07556		0.299146	0		3.42446			1488	-5.88054e-14	1	1.88132	0.627106	1.6974	0.678962	3.57872	1487.5	1.67231	0.557436	1.75213	0.700854	3.42444	-2.07556
1489	0.5	1.5	2.62363	0.874544	1.76904	0.707616	4.39267	1488.5	2.27306	0.757686	1.71512	0.686049	3.98818	-1.51182		0.813951	0		3.98821			1489	0.5	1.5	2.62364	0.874544	1.76904	0.707616	4.39267	1488.5	2.27306	0.757686	1.71512	0.686049	3.98818	-1.51182
1490	0.866025	1.86603	3.46679	1.1556	2.03654	0.814615	5.50333	1489.5	3.06859	1.02286	1.88842	0.755367	4.95701	-0.542991		1.11066	0		4.95705			1490	0.866025	1.86603	3.4668	1.1556	2.03653	0.814615	5.50333	1489.5	3.0686	1.02286	1.88841	0.755367	4.95701	-0.542991
1491	1	2	4.18488	1.39496	2.42822	0.971287	6.6131	1490.5	3.84575	1.28192	2.22559	0.890235	6.07133	0.571333		1.10977	0		6.07137			1491	1	2	4.18488	1.39496	2.42821	0.971287	6.6131	1490.5	3.84575	1.28191	2.22558	0.890235	6.07133	0.571333
1492	0.866025	1.86603	4.58548	1.52849	2.83913	1.13565	7.42461	1491.5	4.39628	1.46543	2.63628	1.05451	7.03257	1.53257		0.811512	0		7.0326			1492	0.866025	1.86603	4.58548	1.52849	2.83913	1.13565	7.42461	1491.5	4.39629	1.46543	2.63628	1.05451	7.03257	1.53257
1493	0.5	1.5	4.56125	1.52042	3.15918	1.26367	7.72042	1492.5	4.57269	1.52423	3.01046	1.20419	7.58315	2.08315		0.295815	0		7.58317			1493	0.5	1.5	4.56125	1.52041	3.15917	1.26367	7.72042	1492.5	4.5727	1.52423	3.01046	1.20419	7.58315	2.08315
1494	6.9586e-14	1	4.11868	1.37289	3.3026	1.32104	7.42128	1493.5	4.32769	1.44256	3.24787	1.29915	7.57556	2.07556		-0.299146	0		7.57556			1494	6.9586e-14	1	4.11869	1.37289	3.30259	1.32104	7.42128	1493.5	4.3277	1.44256	3.24786	1.29915	7.57556	2.07556
1495	-0.5	0.5	3.37637	1.12546	3.23096	1.29238	6.60733	1494.5	3.72694	1.24231	3.28488	1.31395	7.01182	1.51182		-0.813951	0		7.01181			1495	-0.5	0.5	3.37638	1.12546	3.23095	1.29238	6.60733	1494.5	3.72695	1.24231	3.28487	1.31395	7.01182	1.51182
1496	-0.866025	0.133975	2.53321	0.844402	2.96346	1.18538	5.49667	1495.5	2.93141	0.977136	3.11158	1.24463	6.04299	0.542991		-1.11066	6.66134e-16		6.04297			1496	-0.866025	0.133975	2.53321	0.844403	2.96346	1.18538	5.49667	1495.5	2.93142	0.977137	3.11157	1.24463	6.04299	0.542991
1497	-1	0	1.81512	0.60504	2.57178	1.02871	4.3869	1496.5	2.15425	0.718085	2.77441	1.10977	4.92867	-0.571333		-1.10977	2.22045e-16		4.92865			1497	-1	0	1.81513	0.605041	2.57178	1.02871	4.3869	1496.5	2.15426	0.718085	2.77441	1.10977	4.92867	-0.571333
1498	-0.866025	0.133975	1.41452	0.471508	2.16087	0.864347	3.57539	1497.5	1.60372	0.534572	2.36372	0.945487	3.96743	-1.53257		-0.811512	2.22045e-16		3.96743			1498	-0.866025	0.133975	1.41453	0.471509	2.16086	0.864347	3.57539	1497.5	1.60372	0.534573	2.36371	0.945487	3.96743	-1.53257
1499	-0.5	0.5	1.43875	0.479585	1.84082	0.736329	3.27958	1498.5	1.42731	0.47577	1.98954	0.795815	3.41685	-2.08315		-0.295815	0		3.41686			1499	-0.5	0.5	1.43876	0.479585	1.84082	0.736329	3.27958	1498.5	1.42732	0.475771	1.98953	0.795814	3.41685	-2.08315
1500	-8.03667e-14	1	1.88132	0.627106	1.6974	0.678962	3.57872	1499.5	1.67231	0.557436	1.75213	0.700854	3.42444	-2.07556		0.299146	0		3.42446			1500	-8.03667e-14	1	1.88132	0.627106	1.6974	0.678962	3.57872	1499.5	1.67231	0.557436	1.75213	0.700854	3.42444	-2.07556
1501	0.5	1.5	2.62363	0.874544	1.76904	0.707616	4.39267	1500.5	2.27306	0.757686	1.71512	0.686049	3.98818	-1.51182		0.813951	0		3.98821			1501	0.5	1.5	2.62364	0.874544	1.76904	0.707616	4.39267	1500.5	2.27306	0.757686	1.71512	0.686049	3.98818	-1.51182
1502	0.866025	1.86603	3.46679	1.1556	2.03654	0.814615	5.50333	1501.5	3.06859	1.02286	1.88842	0.755367	4.95701	-0.542991		1.11066	0		4.95705			1502	0.866025	1.86603	3.4668	1.1556	2.03653	0.814615	5.50333	1501.5	3.0686	1.02286	1.88841	0.755367	4.95701	-0.542991
1503	1	2	4.18488	1.39496	2.42822	0.971287	6.6131	1502.5	3.84575	1.28192	2.22559	0.890235	6.07133	0.571333		1.10977	0		6.07137			1503	1	2	4.18488	1.39496	2.42821	0.971287	6.6131	1502.5	3.84575	1.28191	2.22558	0.890235	6.07133	0.571333
1504	0.866025	1.86603	4.58548	1.52849	2.83913	1.13565	7.42461	1503.5	4.39628	1.46543	2.63628	1.05451	7.03257	1.53257		0.811512	0		7.0326			1504	0.866025	1.86603	4.58548	1.52849	2.83913	1.13565	7.42461	1503.5	4.39629	1.46543	2.63628	1.05451	7.03257	1.53257
1505	0.5	1.5	4.56125	1.52042	3.15918	1.26367	7.72042	1504.5	4.57269	1.52423	3.01046	1.20419	7.58315	2.08315		0.295815	0		7.58317			1505	0.5	1.5	4.56125	1.52041	3.15917	1.26367	7.72042	1504.5	4.5727	1.52423	3.01046	1.20419	7.58315	2.08315
1506	9.11474e-14	1	4.11868	1.37289	3.3026	1.32104	7.42128	1505.5	4.32769	1.44256	3.24787	1.29915	7.57556	2.07556		-0.299146	0		7.57556			1506	9.11474e-14	1	4.11869	1.37289	3.30259	1.32104	7.42128	1505.5	4.3277	1.44256	3.24786	1.29915	7.57556	2.07556
1507	-0.5	0.5	3.37637	1.12546	3.23096	1.29238	6.60733	1506.5	3.72694	1.24231	3.28488	1.31395	7.01182	1.51182		-0.813951	0		7.01181			1507	-0.5	0.5	3.37638	1.12546	3.23095	1.29238	6.60733	1506.5	3.72695	1.24231	3.28487	1.31395	7.01182	1.51182
1508	-0.866025	0.133975	2.53321	0.844402	2.96346	1.18538	5.49667	1507.5	2.93141	0.977136	3.11158	1.24463	6.04299	0.542991		-1.11066	2.22045e-16		6.04297			1508	-0.866025	0.133975	2.53321	0.844403	2.96346	1.18538	5.49667	1507.5	2.93142	0.977137	3.11157	1.24463	6.04299	0.542991
1509	-1	0	1.81512	0.60504	2.57178	1.02871	4.3869	1508.5	2.15425	0.718085	2.77441	1.10977	4.92867	-0.571333		-1.10977	4.44089e-16		4.92865			1509	-1	0	1.81513	0.605041	2.57178	1.02871	4.3869	1508.5	2.15426	0.718085	2.77441	1.10977	4.92867	-0.571333
1510	-0.866025	0.133975	1.41452	0.471508	2.16087	0.864347	3.57539	1509.5	1.60372	0.534572	2.36372	0.945487	3.96743	-1.53257		-0.811512	2.22045e-16		3.96743			1510	-0.866025	0.133975	1.41453	0.471509	2.16086	0.864347	3.57539	1509.5	1.60372	0.534573	2.36371	0.945487	3.96743	-1.53257
1511	-0.5	0.5	1.43875	0.479585	1.84082	0.736329	3.27958	1510.5	1.42731	0.47577	1.98954	0.795815	3.41685	-2.08315		-0.295815	0		3.41686			1511	-0.5	0.5	1.43876	0.479585	1.84082	0.736329	3.27958	1510.5	1.42732	0.475771	1.98953	0.795814	3.41685	-2.08315
1512	-1.01928e-13	1	1.88132	0.627106	1.6974	0.678962	3.57872	1511.5	1.67231	0.557436	1.75213	0.700854	3.42444	-2.07556		0.299146	0		3.42446			1512	-1.01928e-13	1	1.88132	0.627106	1.6974	0.678962	3.57872	1511.5	1.67231	0.557436	1.75213	0.700854	3.42444	-2.07556
1513	0.5	1.5	2.62363	0.874544	1.76904	0.707616	4.39267	1512.5	2.27306	0.757686	1.71512	0.686049	3.98818	-1.51182		0.813951	0		3.98821			1513	0.5	1.5	2.62364	0.874544	1.76904	0.707616	4.39267	1512.5	2.27306	0.757686	1.71512	0.686049	3.98818	-1.51182
1514	0.866025	1.86603	3.46679	1.1556	2.03654	0.814615	5.50333	1513.5	3.06859	1.02286	1.88842	0.755367	4.95701	-0.542991		1.11066	0		4.95705			1514	0.866025	1.86603	3.4668	1.1556	2.03653	0.814615	5.50333	1513.5	3.0686	1.02286	1.88841	0.755367	4.95701	-0.542991
1515	1	2	4.18488	1.39496	2.42822	0.971287	6.6131	1514.5	3.84575	1.28192	2.22559	0.890235	6.07133	0.571333		1.10977	0		6.07137			1515	1	2	4.18488	1.39496	2.42821	0.971287	6.6131	1514.5	3.84575	1.28191	2.22558	0.890235	6.07133	0.571333
1516	0.866025	1.86603	4.58548	1.52849	2.83913	1.13565	7.42461	1515.5	4.39628	1.46543	2.63628	1.05451	7.03257	1.53257		0.811512	0		7.0326			1516	0.866025	1.86603	4.58548	1.52849	2.83913	1.13565	7.42461	1515.5	4.39629	1.46543	2.63628	1.05451	7.03257	1.53257
1517	0.5	1.5	4.56125	1.52042	3.15918	1.26367	7.72042	1516.5	4.57269	1.52423	3.01046	1.20419	7.58315	2.08315		0.295815	0		7.58317			1517	0.5	1.5	4.56125	1.52041	3.15917	1.26367	7.72042	1516.5	4.5727	1.52423	3.01046	1.20419	7.58315	2.08315
1518	1.12709e-13	1	4.11868	1.37289	3.3026	1.32104	7.42128	1517.5	4.32769	1.44256	3.24787	1.29915	7.57556	2.07556		-0.299146	0		7.57556			1518	1.12709e-13	1	4.11869	1.37289	3.30259	1.32104	7.42128	1517.5	4.3277	1.44256	3.24786	1.29915	7.57556	2.07556
1519	-0.5	0.5	3.37637	1.12546	3.23096	1.29238	6.60733	1518.5	3.72694	1.24231	3.28488	1.31395	7.01182	1.51182		-0.813951	0		7.01181			1519	-0.5	0.5	3.37638	1.12546	3.23095	1.29238	6.60733	1518.5	3.72695	1.24231	3.28487	1.31395	7.01182	1.51182
1520	-0.866025	0.133975	2.53321	0.844402	2.96346	1.18538	5.49667	1519.5	2.93141	0.977136	3.11158	1.24463	6.04299	0.542991		-1.11066	3.33067e-16		6.04297			1520	-0.866025	0.133975	2.53321	0.844403	2.96346	1.18538	5.49667	1519.5	2.93142	0.977137	3.11157	1.24463	6.04299	0.542991
1521	-1	0	1.81512	0.60504	2.57178	1.02871	4.3869	1520.5	2.15425	0.718085	2.77441	1.10977	4.92867	-0.571333		-1.10977	2.22045e-16		4.92865			1521	-1	0	1.81513	0.605041	2.57178	1.02871	4.3869	1520.5	2.15426	0.718085	2.77441	1.10977	4.92867	-0.571333
1522	-0.866025	0.133975	1.41452	0.471508	2.16087	0.864347	3.57539	1521.5	1.60372	0.534572	2.36372	0.945487	3.96743	-1.53257		-0.811512	0		3.96743			1522	-0.866025	0.133975	1.41453	0.471509	2.16086	0.864347	3.57539	1521.5	1.60372	0.534573	2.36371	0.945487	3.96743	-1.53257
1523	-0.5	0.5	1.43875	0.479585	1.84082	0.736329	3.27958	1522.5	1.42731	0.47577	1.98954	0.795815	3.41685	-2.08315		-0.295815	0		3.41686			1523	-0.5	0.5	1.43876	0.479585	1.84082	0.736329	3.27958	1522.5	1.42732	0.475771	1.98953	0.795814	3.41685	-2.08315
1524	-1.23489e-13	1	1.88132	0.627106	1.6974	0.678962	3.57872	1523.5	1.67231	0.557436	1.75213	0.700854	3.42444	-2.07556		0.299146	0		3.42446			1524	-1.23489e-13	1	1.88132	0.627106	1.6974	0.678962	3.57872	1523.5	1.67231	0.557436	1.75213	0.700854	3.42444	-2.07556
1525	0.5	1.5	2.62363	0.874544	1.76904	0.707616	4.39267	1524.5	2.27306	0.757686	1.71512	0.686049	3.98818	-1.51182		0.813951	0		3.98821			1525	0.5	1.5	2.62364	0.874544	1.76904	0.707616	4.39267	1524.5	2.27306	0.757686	1.71512	0.686049	3.98818	-1.51182
1526	0.866025	1.86603	3.46679	1.1556	2.03654	0.814615	5.50333	1525.5	3.06859	1.02286	1.88842	0.755367	4.95701	-0.542991		1.11066	0		4.95705			1526	0.866025	1.86603	3.4668	1.1556	2.03653	0.814615	5.50333	1525.5	3.0686	1.02286	1.88841	0.755367	4.95701	-0.542991
1527	1	2	4.18488	1.39496	2.42822	0.971287	6.6131	1526.5	3.84575	1.28192	2.22559	0.890235	6.07133	0.571333		1.10977	0		6.07137			1527	1	2	4.18488	1.39496	2.42821	0.971287	6.6131	1526.5	3.84575	1.28191	2.22558	0.890235	6.07133	0.571333
1528	0.866025	1.86603	4.58548	1.52849	2.83913	1.13565	7.42461	1527.5	4.39628	1.46543	2.63628	1.05451	7.03257	1.53257		0.811512	0		7.0326			1528	0.866025	1.86603	4.58548	1.52849	2.83913	1.13565	7.42461	1527.5	4.39629	1.46543	2.63628	1.05451	7.03257	1.53257
1529	0.5	1.5	4.56125	1.52042	3.15918	1.26367	7.72042	1528.5	4.57269	1.52423	3.01046	1.20419	7.58315	2.08315		0.295815	0		7.58317			1529	0.5	1.5	4.56125	1.52041	3.15917	1.26367	7.72042	1528.5	4.5727	1.52423	3.01046	1.20419	7.58315	2.08315
1530	1.3427e-13	1	4.11868	1.37289	3.3026	1.32104	7.42128	1529.5	4.32769	1.44256	3.24787	1.29915	7.57556	2.07556		-0.299146	0		7.57556			1530	1.3427e-13	1	4.11869	1.37289	3.30259	1.32104	7.42128	1529.5	4.3277	1.44256	3.24786	1.29915	7.57556	2.07556
1531	-0.5	0.5	3.37637	1.12546	3.23096	1.29238	6.60733	1530.5	3.72694	1.24231	3.28488	1.31395	7.01182	1.51182		-0.813951	0		7.01181			1531	-0.5	0.5	3.37638	1.12546	3.23095	1.29238	6.60733	1530.5	3.72695	1.24231	3.28487	1.31395	7.01182	1.51182
1532	-0.866025	0.133975	2.53321	0.844402	2.96346	1.18538	5.49667	1531.5	2.93141	0.977136	3.11158	1.24463	6.04299	0.542991		-1.11066	-4.44089e-16		6.04297			1532	-0.866025	0.133975	2.53321	0.844403	2.96346	1.18538	5.49667	1531.5	2.93142	0.977137	3.11157	1.24463	6.04299	0.542991
1533	-1	0	1.81512	0.60504	2.57178	1.02871	4.3869	1532.5	2.15425	0.718085	2.77441	1.10977	4.92867	-0.571333		-1.10977	0		4.92865			1533	-1	0	1.81513	0.605041	2.57178	1.02871	4.3869	1532.5	2.15426	0.718085	2.77441	1.10977	4.92867	-0.571333
1534	-0.866025	0.133975	1.41452	0.471508	2.16087	0.864347	3.57539	1533.5	1.60372	0.534572	2.36372	0.945487	3.96743	-1.53257		-0.811512	2.22045e-16		3.96743			1534	-0.866025	0.133975	1.41453	0.471509	2.16086	0.864347	3.57539	1533.5	1.60372	0.534573	2.36371	0.945487	3.96743	-1.53257
1535	-0.5	0.5	1.43875	0.479585	1.84082	0.736329	3.27958	1534.5	1.42731	0.47577	1.98954	0.795815	3.41685	-2.08315		-0.295815	0		3.41686			1535	-0.5	0.5	1.43876	0.479585	1.84082	0.736329	3.27958	1534.5	1.42732	0.475771	1.98953	0.795814	3.41685	-2.08315
1536	-3.13638e-14	1	1.88132	0.627106	1.6974	0.678962	3.57872	1535.5	1.67231	0.557436	1.75213	0.700854	3.42444	-2.07556		0.299146	0		3.42446			1536	-3.13638e-14	1	1.88132	0.627106	1.6974	0.678962	3.57872	1535.5	1.67231	0.557436	1.75213	0.700854	3.42444	-2.07556
1537	0.5	1.5	2.62363	0.874544	1.76904	0.707616	4.39267	1536.5	2.27306	0.757686	1.71512	0.686049	3.98818	-1.51182		0.813951	0		3.98821			1537	0.5	1.5	2.62364	0.874544	1.76904	0.707616	4.39267	1536.5	2.27306	0.757686	1.71512	0.686049	3.98818	-1.51182
1538	0.866025	1.86603	3.46679	1.1556	2.03654	0.814615	5.50333	1537.5	3.06859	1.02286	1.88842	0.755367	4.95701	-0.542991		1.11066	0		4.95705			1538	0.866025	1.86603	3.4668	1.1556	2.03653	0.814615	5.50333	1537.5	3.0686	1.02286	1.88841	0.755367	4.95701	-0.542991
1539	1	2	4.18488	1.39496	2.42822	0.971287	6.6131	1538.5	3.84575	1.28192	2.22559	0.890235	6.07133	0.571333		1.10977	0		6.07137			1539	1	2	4.18488	1.39496	2.42821	0.971287	6.6131	1538.5	3.84575	1.28191	2.22558	0.890235	6.07133	0.571333
1540	0.866025	1.86603	4.58548	1.52849	2.83913	1.13565	7.42461	1539.5	4.39628	1.46543	2.63628	1.05451	7.03257	1.53257		0.811512	0		7.0326			1540	0.866025	1.86603	4.58548	1.52849	2.83913	1.13565	7.42461	1539.5	4.39629	1.46543	2.63628	1.05451	7.03257	1.53257
1541	0.5	1.5	4.56125	1.52042	3.15918	1.26367	7.72042	1540.5	4.57269	1.52423	3.01046	1.20419	7.58315	2.08315		0.295815	0		7.58317			1541	0.5	1.5	4.56125	1.52041	3.15917	1.26367	7.72042	1540.5	4.5727	1.52423	3.01046	1.20419	7.58315	2.08315
1542	4.21445e-14	1	4.11868	1.37289	3.3026	1.32104	7.42128	1541.5	4.32769	1.44256	3.24787	1.29915	7.57556	2.07556		-0.299146	0		7.57556			1542	4.21445e-14	1	4.11869	1.37289	3.30259	1.32104	7.42128	1541.5	4.3277	1.44256	3.24786	1.29915	7.57556	2.07556
1543	-0.5	0.5	3.37637	1.12546	3.23096	1.29238	6.60733	1542.5	3.72694	1.24231	3.28488	1.31395	7.01182	1.51182		-0.813951	0		7.01181			1543	-0.5	0.5	3.37638	1.12546	3.23095	1.29238	6.60733	1542.5	3.72695	1.24231	3.28487	1.31395	7.01182	1.51182
1544	-0.866025	0.133975	2.53321	0.844402	2.96346	1.18538	5.49667	1543.5	2.93141	0.977136	3.11158	1.24463	6.04299	0.542991		-1.11066	0		6.04297			1544	-0.866025	0.133975	2.53321	0.844403	2.96346	1.18538	5.49667	1543.5	2.93142	0.977137	3.11157	1.24463	6.04299	0.542991
1545	-1	0	1.81512	0.60504	2.57178	1.02871	4.3869	1544.5	2.15425	0.718085	2.77441	1.10977	4.92867	-0.571333		-1.10977	-4.44089e-16		4.92865			1545	-1	0	1.81513	0.605041	2.57178	1.02871	4.3869	1544.5	2.15426	0.718085	2.77441	1.10977	4.92867	-0.571333
1546	-0.866025	0.133975	1.41452	0.471508	2.16087	0.864347	3.57539	1545.5	1.60372	0.534572	2.36372	0.945487	3.96743	-1.53257		-0.811512	3.33067e-16		3.96743			1546	-0.866025	0.133975	1.41453	0.471509	2.16086	0.864347	3.57539	1545.5	1.60372	0.534573	2.36371	0.945487	3.96743	-1.53257
1547	-0.5	0.5	1.43875	0.479585	1.84082	0.736329	3.27958	1546.5	1.42731	0.47577	1.98954	0.795815	3.41685	-2.08315		-0.295815	0		3.41686			1547	-0.5	0.5	1.43876	0.479585	1.84082	0.736329	3.27958	1546.5	1.42732	0.475771	1.98953	0.795814	3.41685	-2.08315
1548	-5.29251e-14	1	1.88132	0.627106	1.6974	0.678962	3.57872	1547.5	1.67231	0.557436	1.75213	0.700854	3.42444	-2.07556		0.299146	0		3.42446			1548	-5.29251e-14	1	1.88132	0.627106	1.6974	0.678962	3.57872	1547.5	1.67231	0.557436	1.75213	0.700854	3.42444	-2.07556
1549	0.5	1.5	2.62363	0.874544	1.76904	0.707616	4.39267	1548.5	2.27306	0.757686	1.71512	0.686049	3.98818	-1.51182		0.813951	0		3.98821			1549	0.5	1.5	2.62364	0.874544	1.76904	0.707616	4.39267	1548.5	2.27306	0.757686	1.71512	0.686049	3.98818	-1.51182
1550	0.866025	1.86603	3.46679	1.1556	2.03654	0.814615	5.50333	1549.5	3.06859	1.02286	1.88842	0.755367	4.95701	-0.542991		1.11066	0		4.95705			1550	0.866025	1.86603	3.4668	1.1556	2.03653	0.814615	5.50333	1549.5	3.0686	1.02286	1.88841	0.755367	4.95701	-0.542991
1551	1	2	4.18488	1.39496	2.42822	0.971287	6.6131	1550.5	3.84575	1.28192	2.22559	0.890235	6.07133	0.571333		1.10977	0		6.07137			1551	1	2	4.18488	1.39496	2.42821	0.971287	6.6131	1550.5	3.84575	1.28191	2.22558	0.890235	6.07133	0.571333
1552	0.866025	1.86603	4.58548	1.52849	2.83913	1.13565	7.42461	1551.5	4.39628	1.46543	2.63628	1.05451	7.03257	1.53257		0.811512	0		7.0326			1552	0.866025	1.86603	4.58548	1.52849	2.83913	1.13565	7.42461	1551.5	4.39629	1.46543	2.63628	1.05451	7.03257	1.53257
1553	0.5	1.5	4.56125	1.52042	3.15918	1.26367	7.72042	1552.5	4.57269	1.52423	3.01046	1.20419	7.58315	2.08315		0.295815	0		7.58317			1553	0.5	1.5	4.56125	1.52041	3.15917	1.26367	7.72042	1552.5	4.5727	1.52423	3.01046	1.20419	7.58315	2.08315
1554	6.37058e-14	1	4.11868	1.37289	3.3026	1.32104	7.42128	1553.5	4.32769	1.44256	3.24787	1.29915	7.57556	2.07556		-0.299146	0		7.57556			1554	6.37058e-14	1	4.11869	1.37289	3.30259	1.32104	7.42128	1553.5	4.3277	1.44256	3.24786	1.29915	7.57556	2.07556
1555	-0.5	0.5	3.37637	1.12546	3.23096	1.29238	6.60733	1554.5	3.72694	1.24231	3.28488	1.31395	7.01182	1.51182		-0.813951	0		7.01181			1555	-0.5	0.5	3.37638	1.12546	3.23095	1.29238	6.60733	1554.5	3.72695	1.24231	3.28487	1.31395	7.01182	1.51182
1556	-0.866025	0.133975	2.53321	0.844402	2.96346	1.18538	5.49667	1555.5	2.93141	0.977136	3.11158	1.24463	6.04299	0.542991		-1.11066	4.44089e-16		6.04297			1556	-0.866025	0.133975	2.53321	0.844403	2.96346	1.18538	5.49667	1555.5	2.93142	0.977137	3.11157	1.24463	6.04299	0.542991
1557	-1	0	1.81512	0.60504	2.57178	1.02871	4.3869	1556.5	2.15425	0.718085	2.77441	1.10977	4.92867	-0.571333		-1.10977	0		4.92865			1557	-1	0	1.81513	0.605041	2.57178	1.02871	4.3869	1556.5	2.15426	0.718085	2.77441	1.10977	4.92867	-0.571333
1558	-0.866025	0.133975	1.41452	0.471508	2.16087	0.864347	3.57539	1557.5	1.60372	0.534572	2.36372	0.945487	3.96743	-1.53257		-0.811512	-2.22045e-16		3.96743			1558	-0.866025	0.133975	1.41453	0.471509	2.16086	0.864347	3.57539	1557.5	1.60372	0.534573	2.36371	0.945487	3.96743	-1.53257
1559	-0.5	0.5	1.43875	0.479585	1.84082	0.736329	3.27958	1558.5	1.42731	0.47577	1.98954	0.795815	3.41685	-2.08315		-0.295815	0		3.41686			1559	-0.5	0.5	1.43876	0.479585	1.84082	0.736329	3.27958	1558.5	1.42732	0.475771	1.98953	0.795814	3.41685	-2.08315
1560	-7.44864e-14	1	1.88132	0.627106	1.6974	0.678962	3.57872	1559.5	1.67231	0.557436	1.75213	0.700854	3.42444	-2.07556		0.299146	0		3.42446			1560	-7.44864e-14	1	1.88132	0.627106	1.6974	0.678962	3.57872	1559.5	1.67231	0.557436	1.75213	0.700854	3.42444	-2.07556
1561	0.5	1.5	2.62363	0.874544	1.76904	0.707616	4.39267	1560.5	2.27306	0.757686	1.71512	0.686049	3.98818	-1.51182		0.813951	0		3.98821			1561	0.5	1.5	2.62364	0.874544	1.76904	0.707616	4.39267	1560.5	2.27306	0.757686	1.71512	0.686049	3.98818	-1.51182
1562	0.866025	1.86603	3.46679	1.1556	2.03654	0.814615	5.50333	1561.5	3.06859	1.02286	1.88842	0.755367	4.95701	-0.542991		1.11066	0		4.95705			1562	0.866025	1.86603	3.4668	1.1556	2.03653	0.814615	5.50333	1561.5	3.0686	1.02286	1.88841	0.755367	4.95701	-0.542991
1563	1	2	4.18488	1.39496	2.42822	0.971287	6.6131	1562.5	3.84575	1.28192	2.22559	0.890235	6.07133	0.571333		1.10977	0		6.07137			1563	1	2	4.18488	1.39496	2.42821	0.971287	6.6131	1562.5	3.84575	1.28191	2.22558	0.890235	6.07133	0.571333
1564	0.866025	1.86603	4.58548	1.52849	2.83913	1.13565	7.42461	1563.5	4.39628	1.46543	2.63628	1.05451	7.03257	1.53257		0.811512	0		7.0326			1564	0.866025	1.86603	4.58548	1.52849	2.83913	1.13565	7.42461	1563.5	4.39629	1.46543	2.63628	1.05451	7.03257	1.53257
1565	0.5	1.5	4.56125	1.52042	3.15918	1.26367	7.72042	1564.5	4.57269	1.52423	3.01046	1.20419	7.58315	2.08315		0.295815	0		7.58317			1565	0.5	1.5	4.56125	1.52041	3.15917	1.26367	7.72042	1564.5	4.5727	1.52423	3.01046	1.20419	7.58315	2.08315
1566	8.52671e-14	1	4.11868	1.37289	3.3026	1.32104	7.42128	1565.5	4.32769	1.44256	3.24787	1.29915	7.57556	2.07556		-0.299146	0		7.57556			1566	8.52671e-14	1	4.11869	1.37289	3.30259	1.32104	7.42128	1565.5	4.3277	1.44256	3.24786	1.29915	7.57556	2.07556
1567	-0.5	0.5	3.37637	1.12546	3.23096	1.29238	6.60733	1566.5	3.72694	1.24231	3.28488	1.31395	7.01182	1.51182		-0.813951	0		7.01181			1567	-0.5	0.5	3.37638	1.12546	3.23095	1.29238	6.60733	1566.5	3.72695	1.24231	3.28487	1.31395	7.01182	1.51182
1568	-0.866025	0.133975	2.53321	0.844402	2.96346	1.18538	5.49667	1567.5	2.93141	0.977136	3.11158	1.24463	6.04299	0.542991		-1.11066	5.55112e-16		6.04297			1568	-0.866025	0.133975	2.53321	0.844403	2.96346	1.18538	5.49667	1567.5	2.93142	0.977137	3.11157	1.24463	6.04299	0.542991
1569	-1	0	1.81512	0.60504	2.57178	1.02871	4.3869	1568.5	2.15425	0.718085	2.77441	1.10977	4.92867	-0.571333		-1.10977	-4.44089e-16		4.92865			1569	-1	0	1.81513	0.605041	2.57178	1.02871	4.3869	1568.5	2.15426	0.718085	2.77441	1.10977	4.92867	-0.571333
1570	-0.866025	0.133975	1.41452	0.471508	2.16087	0.864347	3.57539	1569.5	1.60372	0.534572	2.36372	0.945487	3.96743	-1.53257		-0.811512	5.55112e-16		3.96743			1570	-0.866025	0.133975	1.41453	0.471509	2.16086	0.864347	3.57539	1569.5	1.60372	0.534573	2.36371	0.945487	3.96743	-1.53257
1571	-0.5	0.5	1.43875	0.479585	1.84082	0.736329	3.27958	1570.5	1.42731	0.47577	1.98954	0.795815	3.41685	-2.08315		-0.295815	0		3.41686			1571	-0.5	0.5	1.43876	0.479585	1.84082	0.736329	3.27958	1570.5	1.42732	0.475771	1.98953	0.795814	3.41685	-2.08315
1572	-9.60477e-14	1	1.88132	0.627106	1.6974	0.678962	3.57872	1571.5	1.67231	0.557436	1.75213	0.700854	3.42444	-2.07556		0.299146	0		3.42446			1572	-9.60477e-14	1	1.88132	0.627106	1.6974	0.678962	3.57872	1571.5	1.67231	0.557436	1.75213	0.700854	3.42444	-2.07556
1573	0.5	1.5	2.62363	0.874544	1.76904	0.707616	4.39267	1572.5	2.27306	0.757686	1.71512	0.686049	3.98818	-1.51182		0.813951	0		3.98821			1573	0.5	1.5	2.62364	0.874544	1.76904	0.707616	4.39267	1572.5	2.27306	0.757686	1.71512	0.686049	3.98818	-1.51182
[truncated: 219 more rows]

## Sheet: Synthetic Phase
N Ampl.	N Offset	tau C	tau R	AvgMCm	AvgMRm	AvgMTm	StdMCm/N	StdMRm/N	StdMTm/N	StdRCm/N	StdRRm/N	StdRR / Std RC	StdMR / StdRC						Offset	Offset	Offset	Phase Shift MT-MR	om 1		Phase adaption
[truncated: 1,801 more rows]

## Sheet: Results Sythetic
tC	tR	tC+tR	Std MC / Std N	Std MR / Std N	Std MT / Std N	StdRC / StdN	Std RR / StdN	StdRR / Std RC	StdMR / StdRC		tC	tR	tC+tR	MC Phase	MR Phase	MT Phase	MC Phase Fit	MR Phase Fit	MT Phase Fit	Fit Parameter			tC	tR	tC+tR	MT Phase	MT Phase Fit		Approach	Opti	tC	tR	tC+tR	tR/tC	tC Fit	tR Fit	RMSE RR	RMSE dMT	relError tC	relError tR	relError tC+tR
[truncated: 222 more rows]

[truncated: 4 more sheets: Graphs Synthetic, Amazon, Graphs Amazon, Table 1]
